# Supplementary material for: Seasonal evolution of the effective thermal conductivity of the snow and the soil in high Arctic herb tundra at Bylot Island, Canada
Source: Copernicus journal article supplement (doi:10.5194/tc-2016-107), 2016-05-13
Supplement: Supplementary file 1 [file Data.xlsx]

## Sheet: Thermal conductivity2014-2015
	2014-2015 season
	Thermal conductivity
	Snow	Snow	Snow		Soil
date	22 cm	12 cm	2 cm		-10 cm
2014-07-28					0.731774
2014-07-30					0.745585
2014-08-01					0.732852
2014-08-03					0.713582
2014-08-05					0.70265
2014-08-07					0.709464
2014-08-09					0.708081
2014-08-11					0.772732
2014-08-13					0.723766
2014-08-15					0.744614
2014-08-17					0.755008
2014-08-19					0.739038
2014-08-21					0.723424
2014-08-23					0.700784
2014-08-25					0.688557
2014-08-27					0.700962
2014-08-29					0.726202
2014-08-31					0.750896
2014-09-02					0.76042
2014-09-04					0.736656
2014-09-06					0.724186
2014-09-08					0.766417
2014-09-10					0.736338
2014-09-12					0.767396
2014-09-14			0.0276056		0.731974
2014-09-16					0.743268
2014-09-18			0.0380073		0.749389
2014-09-20					0.733227
2014-09-22					0.756644
2014-09-24			0.0287874		0.726333
2014-09-26			0.032143		0.714023
2014-09-28			0.0488206		0.737225
2014-09-30					0.758457
2014-10-02			0.0336949		1.16381
2014-10-04
2014-10-06			0.0302229
2014-10-08			0.0278303		1.59205
2014-10-10			0.0220042		1.8801
2014-10-12			0.0323956		1.76908
2014-10-14			0.0141455		1.94083
2014-10-16			0.0225743		1.7578
2014-10-18			0.0211301		1.69912
2014-10-20			0.014459		1.80319
2014-10-22			0.015694		1.98599
2014-10-24			0.0174119		1.54987
2014-10-26			0.0163511		1.77576
2014-10-28			0.0180183		1.80111
2014-10-30			0.0193257
2014-11-01			0.0186394		1.9668
2014-11-03		0.0308796	0.0207952		1.95969
2014-11-05			0.0176276		1.88303
2014-11-07			0.0195973
2014-11-09			0.0169492
2014-11-11			0.0202101		1.69695
2014-11-13		0.276743	0.0167384		1.93388
2014-11-15		0.242938	0.0163775
2014-11-17		0.288743	0.0170196
2014-11-19		0.246584	0.0170383
2014-11-21		0.261577	0.018128		1.97862
2014-11-23		0.239088	0.0165293
2014-11-25		0.298432	0.0174225		1.82399
2014-11-27		0.244045	0.0171105
2014-11-29		0.289246	0.0183565
2014-12-01		0.265731	0.0165331		1.59888
2014-12-03		0.258886	0.0179253
2014-12-05		0.244078	0.0172733		1.61577
2014-12-07		0.246199	0.0184469
2014-12-09		0.274775	0.0165113
2014-12-11		0.263504	0.0193473
2014-12-13		0.289812	0.0177876		1.80651
2014-12-15		0.261028	0.0195334		1.73823
2014-12-17		0.253964	0.018978		1.71075
2014-12-19		0.266471	0.017589
2014-12-21		0.253326	0.0189111
2014-12-23		0.254488	0.0190052
2014-12-25		0.251109	0.0179552		1.56759
2014-12-27		0.279875	0.0184467		1.57595
2014-12-29		0.270919	0.0191643		1.76084
2014-12-31		0.306559	0.0179566
2015-01-01		0.230933	0.0176512
2015-01-03		0.260041	0.0194743
2015-01-05		0.241399	0.0177413		1.65152
2015-01-07	0.058533	0.249678	0.0182175		1.95568
2015-01-09	0.0536395	0.271726	0.019155		1.65345
2015-01-11	0.0447057	0.267086	0.0182413
2015-01-13	0.0322928	0.262716	0.0187489		1.64994
2015-01-15		0.264942	0.0178209		1.71449
2015-01-17		0.249948	0.0188237
2015-01-19		0.259624	0.0191433
2015-01-21	0.0678036	0.260643	0.0188647		1.58576
2015-01-23	0.0721069	0.26119	0.0184923
2015-01-25	0.0647051	0.263294	0.0180802
2015-01-27	0.0696738	0.253645	0.0178509
2015-01-29	0.0646489	0.2518	0.0186305		1.5805
2015-01-31	0.0596529	0.26547	0.0192109		1.4819
2015-02-02	0.0637396	0.264396	0.0183866
2015-02-04	0.0596804	0.260378	0.0190437
2015-02-06	0.0605416	0.270339	0.0181418
2015-02-08	0.0600332	0.267316	0.0189074		1.93831
2015-02-10	0.175464	0.269101	0.0183575
2015-02-12	0.183075	0.253419	0.0184038
2015-02-14	0.180781	0.275314	0.0188094
2015-02-16	0.19152	0.266779	0.0192721
2015-02-18	0.209699	0.272476	0.0189972
2015-02-20	0.195747	0.268365	0.0183692
2015-02-22	0.196664	0.266605	0.0189523		1.49377
2015-02-24	0.197834	0.266563	0.0193089		1.67918
2015-02-26	0.202801	0.266634	0.0205568
2015-02-28	0.198123	0.268811	0.0198231		1.79805
2015-03-02	0.199732	0.269892	0.0197326		1.7485
2015-03-04	0.199147	0.265217	0.0190829
2015-03-06	0.201999	0.267705	0.0193606
2015-03-08	0.199319	0.259877	0.0202404		1.70535
2015-03-10	0.205328	0.264332	0.0198212		2.13463
2015-03-12	0.217425	0.268799	0.0203959
2015-03-14	0.197767	0.268531	0.0206901
2015-03-16	0.192539	0.266296	0.0212383
2015-03-18	0.213134	0.265101	0.0224738
2015-03-20	0.216745	0.261713	0.0217395		1.67161
2015-03-22	0.216226	0.266113	0.0217221
2015-03-24	0.222133	0.235052	0.0223248
2015-03-26	0.220046	0.268378	0.0219683		1.77741
2015-03-28	0.226055	0.273699	0.0217923
2015-03-30	0.227994	0.229945	0.0220444		1.6884
2015-04-01	0.225289	0.231276	0.0219009		1.71347
2015-04-03	0.228005	0.228481	0.0218893		1.86605
2015-04-05	0.233367	0.234978	0.0220501
2015-04-07	0.231491	0.234575	0.0223084
2015-04-09	0.234064	0.241912	0.0224278		2.13366
2015-04-11	0.236712	0.229625	0.0225024		1.8875
2015-04-13	0.235365	0.229514	0.0226179
2015-04-15	0.244426	0.228813	0.0226757		1.93928
2015-04-17	0.241834	0.231218	0.0229553
2015-04-19	0.248982	0.232522	0.0232056
2015-04-21	0.25054	0.233394	0.0238153		2.18595
2015-04-23	0.280184	0.249635	0.024153		1.92491
2015-04-25	0.308528	0.240093	0.0238627		2.02104
2015-04-27	0.265104	0.237286	0.0239439		2.0965
2015-04-29	0.279972	0.239359	0.0240804		1.94899
2015-05-01	0.264624	0.236737	0.0240398		2.07239
2015-05-03	0.257908	0.238159	0.0240341		2.16615
2015-05-05	0.266309	0.245446	0.0247222		2.28079
2015-05-07	0.266774	0.253271	0.0239827
2015-05-09	0.25557	0.264834	0.0220002		1.96851
2015-05-11	0.253456	0.270903	0.0223468		2.03885
2015-05-13	0.254598	0.289918	0.0229465		2.23404
2015-05-15	0.247801	0.302829	0.023622		2.04135
2015-05-17	0.255836	0.287491	0.0241951		1.85392
2015-05-19	0.261146	0.320071	0.0239758		1.9821
2015-05-21	0.255364	0.318957	0.024941		2.04857
2015-05-23	0.240752	0.325579	0.0246859		1.86554
2015-05-25	0.255608	0.324983	0.0244991		2.12742
2015-05-27	0.256425	0.32565	0.0247895		1.98723
2015-05-29	0.247633	0.329988	0.0254521		2.03031
2015-05-31	0.265132	0.33036	0.0265694		1.98222
2015-06-02		0.316332	0.0167111		1.76733
2015-06-04		0.33032	0.0287489		1.96448
2015-06-06		0.293963	0.0295541		2.12307
2015-06-08		0.294826	0.0304987		1.66866
2015-06-10					1.90783
2015-06-12					2.11992
2015-06-14					1.72446
2015-06-16					2.05389
2015-06-18					1.99057
2015-06-20					0.806005
2015-06-22					0.717318
2015-06-24					0.701263
2015-06-26					0.708514

## Sheet: Temperature2014-2015
2014-2015 season								2014-2015 season
	Temperatures from TP08 needle probes							10 cm depth	Hourly data from EC5 Decagon probe
date	-10cm	2cm	12cm	22cm				Date	Water Volume%	Temperature
2014-07-28	2.75449	5.10616	5.11249	4.94664				2014-07-28	0.419087	4
2014-07-30	2.95064	5.69109	5.85698	5.5033				2014-07-28 01:00:00	0.419265	3.9
2014-08-01	3.23387	7.39125	7.81574	7.57942				2014-07-28 02:00:00	0.419443	3.7
2014-08-03	2.59813	7.69759	7.74567	6.94095				2014-07-28 03:00:00	0.419798	3.6
2014-08-05	4.41058	4.79666	4.91489	4.68033				2014-07-28 04:00:00	0.419975	3.4
2014-08-07	4.08037	4.23257	4.41841	4.20699				2014-07-28 05:00:00	0.42033	3.3
2014-08-09	2.72282	2.82632	2.53551	2.13178				2014-07-28 06:00:00	0.420506	3.1
2014-08-11	2.45314	2.55	2.60744	2.2827				2014-07-28 07:00:00	0.420683	3
2014-08-13	1.21072	2.36882	2.59953	2.37964				2014-07-28 08:00:00	0.42086	2.9
2014-08-15	1.86238	0.617127	0.483048	0.0192261				2014-07-28 09:00:00	0.421036	2.9
2014-08-17	1.57886	4.48229	4.18823	3.48276				2014-07-28 10:00:00	0.421212	2.9
2014-08-19	2.10742	2.49231	2.71669	2.42274				2014-07-28 11:00:00	0.421388	2.9
2014-08-21	1.40262	2.48152	2.48152	2.18767				2014-07-28 12:00:00	0.421212	2.9
2014-08-23	1.43829	2.23238	2.46199	2.23729				2014-07-28 13:00:00	0.421212	3
2014-08-25	2.39046	2.48152	2.42274	2.18767				2014-07-28 14:00:00	0.421036	3.1
2014-08-27	1.61664	-0.474579	-0.815628	-0.94339				2014-07-28 15:00:00	0.421036	3.2
2014-08-29	2.15996	1.77609	1.15057	-0.123611				2014-07-28 16:00:00	0.42086	3.4
2014-08-31	1.31226	0.111832	-1.18839	-3.1674				2014-07-28 17:00:00	0.420683	3.5
2014-09-02	1.56802	1.90466	0.885055	0.895752				2014-07-28 18:00:00	0.420506	3.6
2014-09-04	0.794586	-0.767609	-0.826218	-1.002				2014-07-28 19:00:00	0.420506	3.7
2014-09-06	0.901291	-1.23634	-1.29488	-1.002				2014-07-28 20:00:00	0.42033	3.8
2014-09-08	0.599289	-4.06094	-4.40352	-4.75746				2014-07-28 21:00:00	0.42033	3.8
2014-09-10	-0.319855	-0.591614	-0.532806	-0.590805				2014-07-28 22:00:00	0.42033	3.8
2014-09-12	-0.458664	-2.48769	-2.87622	-3.13121				2014-07-28 23:00:00	0.42033	3.8
2014-09-14	-0.410645	-3.78545	-3.90237	-4.13614				2014-07-29	0.420506	3.7
2014-09-16	-0.338409	-1.6981	-0.874237	-1.15147				2014-07-29 01:00:00	0.420683	3.6
2014-09-18	-0.375946	-6.19696	-6.1431	-6.42447				2014-07-29 02:00:00	0.42086	3.5
2014-09-20	-0.362671	-1.73747	-4.13602	-4.60306				2014-07-29 03:00:00	0.421036	3.4
2014-09-22	-0.446762	-2.00194	-3.20705	-3.2085				2014-07-29 04:00:00	0.421388	3.3
2014-09-24	-0.432053	-3.80765	-6.02644	-6.43307				2014-07-29 05:00:00	0.421564	3.2
2014-09-26	-0.34697	-5.29188	-7.6254	-8.20789				2014-07-29 06:00:00	0.42174	3.2
2014-09-28	-0.432098	-5.55029	-6.0755	-6.20254				2014-07-29 07:00:00	0.421916	3.1
2014-09-30	-0.346832	-5.11655	-9.54628	-9.76868				2014-07-29 08:00:00	0.422091	3
2014-10-02	-0.432037	-5.39894	-12.4816	-12.6107				2014-07-29 09:00:00	0.422266	3
2014-10-04	-0.40567	-4.88297	-6.92595	-7.33401				2014-07-29 10:00:00	0.422442	3
2014-10-06	-0.48587	-9.91983	-12.1852	-13.1131				2014-07-29 11:00:00	0.422442	3
2014-10-08	-0.863983	-8.96381	-10.1834	-10.1799				2014-07-29 12:00:00	0.422442	3
2014-10-10	-0.98172	-7.45058	-8.26616	-8.7319				2014-07-29 13:00:00	0.422442	3.1
2014-10-12	-0.888825	-2.0266	-1.8909	-2.01343				2014-07-29 14:00:00	0.422266	3.2
2014-10-14	-1.30037	-6.36488	-7.39604	-7.54845				2014-07-29 15:00:00	0.422442	3.3
2014-10-16	-1.54021	-7.41249	-8.52651	-7.87651				2014-07-29 16:00:00	0.422266	3.4
2014-10-18	-3.00671	-9.16336	-10.0941	-10.4429				2014-07-29 17:00:00	0.422266	3.5
2014-10-20	-2.71713	-3.97029	-10.7816	-10.5113				2014-07-29 18:00:00	0.422091	3.6
2014-10-22	-3.36999	-7.38136	-14.9344	-15.5708				2014-07-29 19:00:00	0.422091	3.6
2014-10-24	-6.81857	-8.72179	-13.3124	-13.834				2014-07-29 20:00:00	0.422091	3.7
2014-10-26	-9.96512	-11.9103	-17.6999	-17.9816				2014-07-29 21:00:00	0.422091	3.7
2014-10-28	-9.39293	-9.9442	-14.3554	-13.776				2014-07-29 22:00:00	0.422091	3.7
2014-10-30	-7.59807	-7.6254	-8.61545	-8.84828				2014-07-29 23:00:00	0.422266	3.7
2014-11-01	-8.25032	-9.37173	-12.385	-12.8501				2014-07-30	0.422617	3.7
2014-11-03	-7.80196	-7.07225	-7.64688	-7.68378				2014-07-30 01:00:00	0.423489	3.6
2014-11-05	-8.65007	-12.1776	-20.7329	-20.8002				2014-07-30 02:00:00	0.425395	3.5
2014-11-07	-10.3411	-12.0789	-16.358	-16.8721				2014-07-30 03:00:00	0.426769	3.5
2014-11-09	-10.56	-14.0146	-22.0983	-22.6732				2014-07-30 04:00:00	0.428982	3.4
2014-11-11	-10.7058	-10.2685	-12.7071	-13.3548				2014-07-30 05:00:00	0.433827	3.3
2014-11-13	-13.8126	-15.926	-22.3857	-21.8682				2014-07-30 06:00:00	0.438873	3.3
2014-11-15	-15.4296	-17.9457	-26.8138	-28.8063				2014-07-30 07:00:00	0.449185	3.2
2014-11-17	-15.5862	-17.1094	-21.5512	-21.3209				2014-07-30 08:00:00	0.457073	3.2
2014-11-19	-16.066	-17.7263	-25.1636	-27.4556				2014-07-30 09:00:00	0.465762	3.2
2014-11-21	-18.3696	-18.9275	-22.9599	-23.362				2014-07-30 10:00:00	0.467977	3.1
2014-11-23	-19.8678	-21.7508	-27.7795	-28.5214				2014-07-30 11:00:00	0.468802	3.1
2014-11-25	-20.2998	-21.8833	-27.6658	-26.9307				2014-07-30 12:00:00	0.469349	3.1
2014-11-27	-20.9783	-23.6119	-30.9861	-32.3961				2014-07-30 13:00:00	0.469623	3.2
2014-11-29	-20.5078	-20.9396	-25.3569	-27.6363				2014-07-30 14:00:00	0.469759	3.2
2014-12-01	-22.6221	-26.1611	-36.0795	-41.9579				2014-07-30 15:00:00	0.469623	3.4
2014-12-03	-22.4757	-23.7941	-31.6963	-34.8368				2014-07-30 16:00:00	0.469213	3.5
2014-12-05	-22.0569	-24.9678	-28.8014	-27.3621				2014-07-30 17:00:00	0.468664	3.7
2014-12-07	-21.2147	-22.9039	-27.0278	-27.3679				2014-07-30 18:00:00	0.46784	3.9
2014-12-09	-22.9549	-29.1766	-37.8949	-39.4251				2014-07-30 19:00:00	0.467288	4.1
2014-12-11	-21.4357	-22.1549	-24.6832	-25.4287				2014-07-30 20:00:00	0.467011	4.3
2014-12-13	-20.4522	-24.1759	-30.1886	-31.2097				2014-07-30 21:00:00	0.466873	4.3
2014-12-15	-21.9078	-25.9002	-30.7168	-30.5093				2014-07-30 22:00:00	0.466873	4.4
2014-12-17	-22.5861	-24.1769	-26.7494	-28.0665				2014-07-30 23:00:00	0.467011	4.3
2014-12-19	-22.4266	-26.9508	-34.1359	-37.6473				2014-07-31	0.46784	4.3
2014-12-21	-23.2895	-25.5749	-27.957	-27.9996				2014-07-31 01:00:00	0.468252	4.2
2014-12-23	-22.5571	-25.8617	-30.2123	-31.5251				2014-07-31 02:00:00	0.468802	4
2014-12-25	-23.0895	-27.3224	-33.0387	-36.6702				2014-07-31 03:00:00	0.469349	3.9
2014-12-27	-23.9092	-27.1532	-31.7847	-34.0726				2014-07-31 04:00:00	0.469896	3.7
2014-12-29	-23.9087	-26.4056	-28.8101	-27.6086				2014-07-31 05:00:00	0.470304	3.6
2014-12-31	-24.8929	-30.7334	-39.0348	-43.7937				2014-07-31 06:00:00	0.470848	3.5
2015-01-01	-25.1895	-29.7009	-35.2821	-38.7628				2014-07-31 07:00:00	0.47139	3.4
2015-01-03	-24.4375	-25.726	-26.8162	-26.2336				2014-07-31 08:00:00	0.472469	3.4
2015-01-05	-24.7351	-29.1766	-35.0637	-40.5658				2014-07-31 09:00:00	0.474612	3.3
2015-01-07	-24.7872	-28.6707	-34.7793	-41.8005				2014-07-31 10:00:00	0.474878	3.2
2015-01-09	-24.2804	-26.3155	-29.1235	-31.8973				2014-07-31 11:00:00	0.474745	3.2
2015-01-11	-24.5997	-28.1392	-33.6133	-39.7998				2014-07-31 12:00:00	0.474878	3.2
2015-01-13	-23.9209	-26.7755	-31.6648	-34.5734				2014-07-31 13:00:00	0.474745	3.2
2015-01-15	-25.6973	-30.616	-37.3276	-39.6517				2014-07-31 14:00:00	0.474345	3.2
2015-01-17	-26.8849	-31.7328	-38.5523	-40.8175				2014-07-31 15:00:00	0.473945	3.2
2015-01-19	-27.5158	-28.9284	-30.8145	-31.0428				2014-07-31 16:00:00	0.473276	3.2
2015-01-21	-26.1567	-28.7186	-33.3464	-39.5384				2014-07-31 17:00:00	0.473276	3.2
2015-01-23	-28.0075	-31.9324	-38.7666	-47.2396				2014-07-31 18:00:00	0.47341	3.2
2015-01-25	-28.9943	-32.6528	-38.5731	-43.5236				2014-07-31 19:00:00	0.473543	3.2
2015-01-27	-29.6457	-33.1711	-39.1422	-46.035				2014-07-31 20:00:00	0.473811	3.2
2015-01-29	-28.9224	-31.5358	-36.6645	-43.6201				2014-07-31 21:00:00	0.474078	3.2
2015-01-31	-28.9969	-31.2095	-35.7699	-42.7386				2014-07-31 22:00:00	0.474479	3.2
2015-02-02	-29.2088	-32.0407	-37.2237	-44.4267				2014-07-31 23:00:00	0.474745	3.2
2015-02-04	-29.1362	-31.5043	-36.129	-41.9003				2014-08-01	0.475011	3.2
2015-02-06	-29.8694	-33.3852	-39.0731	-45.7492				2014-08-01 01:00:00	0.475409	3.2
2015-02-08	-29.8819	-31.635	-34.8271	-37.1095				2014-08-01 02:00:00	0.475409	3.2
2015-02-10	-29.1248	-32.7005	-38.1833	-46.3683				2014-08-01 03:00:00	0.475675	3.1
2015-02-12	-30.2129	-33.7276	-38.8464	-44.8958				2014-08-01 04:00:00	0.475939	3.1
2015-02-14	-30.6126	-33.1502	-36.6314	-38.5132				2014-08-01 05:00:00	0.476204	3.1
2015-02-16	-29.9903	-31.734	-34.4137	-38.3346				2014-08-01 06:00:00	0.476336	3.1
2015-02-18	-30.1402	-33.033	-37.3031	-42.32				2014-08-01 07:00:00	0.4766	3
2015-02-20	-30.4898	-33.9078	-39.0821	-45.4592				2014-08-01 08:00:00	0.476732	3
2015-02-22	-31.0656	-34.0622	-37.985	-39.8554				2014-08-01 09:00:00	0.476864	3
2015-02-24	-30.2653	-32.5982	-36.461	-41.8916				2014-08-01 10:00:00	0.476864	3.1
2015-02-26	-28.9411	-29.5422	-31.0273	-35.0711				2014-08-01 11:00:00	0.476995	3.2
2015-02-28	-29.7459	-31.8888	-34.5192	-35.7612				2014-08-01 12:00:00	0.476864	3.3
2015-03-02	-29.226	-31.5523	-35.0393	-40.5346				2014-08-01 13:00:00	0.4766	3.4
2015-03-04	-30.3846	-33.7937	-38.7418	-44.7268				2014-08-01 14:00:00	0.4766	3.5
2015-03-06	-31.0046	-34.1266	-38.7984	-44.8391				2014-08-01 15:00:00	0.4766	3.6
2015-03-08	-30.6916	-32.5573	-35.5666	-39.4818				2014-08-01 16:00:00	0.476468	3.8
2015-03-10	-31.1347	-34.1611	-39.0902	-44.9136				2014-08-01 17:00:00	0.476336	3.9
2015-03-12	-30.4941	-32.2374	-35.1442	-39.9687				2014-08-01 18:00:00	0.476072	4
2015-03-14	-30.4731	-32.044	-34.5041	-37.8392				2014-08-01 19:00:00	0.475939	4.2
2015-03-16	-29.9486	-30.6612	-31.5115	-30.0754				2014-08-01 20:00:00	0.475675	4.3
2015-03-18	-27.6786	-27.0308	-26.2868	-25.9432				2014-08-01 21:00:00	0.475542	4.5
2015-03-20	-26.7137	-26.8428	-26.9041	-27.9359				2014-08-01 22:00:00	0.475277	4.6
2015-03-22	-26.7377	-27.2252	-27.9697	-29.3996				2014-08-01 23:00:00	0.475277	4.6
2015-03-24	-26.3743	-26.5179	-26.7564	-27.4911				2014-08-02	0.475144	4.6
2015-03-26	-26.0784	-26.2886	-26.8036	-28.0614				2014-08-02 01:00:00	0.475144	4.6
2015-03-28	-25.9548	-26.2804	-27.0357	-29.1075				2014-08-02 02:00:00	0.475144	4.5
2015-03-30	-25.8587	-26.1169	-26.6419	-27.2144				2014-08-02 03:00:00	0.475277	4.4
2015-04-01	-25.705	-26.0879	-27.1109	-29.1154				2014-08-02 04:00:00	0.475409	4.2
2015-04-03	-25.7208	-26.0602	-27.1984	-29.5466				2014-08-02 05:00:00	0.475542	4.1
2015-04-05	-25.6477	-26.0785	-27.111	-29.1157				2014-08-02 06:00:00	0.475807	4.1
2015-04-07	-25.4512	-25.7194	-26.695	-28.433				2014-08-02 07:00:00	0.475939	4
2015-04-09	-25.1977	-25.4659	-26.4896	-28.667				2014-08-02 08:00:00	0.475939	3.9
2015-04-11	-25.2455	-25.6763	-26.7183	-29.1709				2014-08-02 09:00:00	0.476072	4
2015-04-13	-25.2177	-25.7637	-26.9689	-29.5466				2014-08-02 10:00:00	0.476072	4
2015-04-15	-25.12	-25.388	-26.2486	-28.0817				2014-08-02 11:00:00	0.476204	4.1
2015-04-17	-24.6441	-24.2809	-24.1183	-23.9461				2014-08-02 12:00:00	0.476204	4.1
2015-04-19	-23.8021	-23.4775	-23.5924	-24.4728				2014-08-02 13:00:00	0.476336	4.3
2015-04-21	-23.3228	-22.4791	-21.6674	-21.2073				2014-08-02 14:00:00	0.476336	4.5
2015-04-23	-22.9108	-22.6401	-22.7015	-24.4048				2014-08-02 15:00:00	0.476204	4.7
2015-04-25	-22.9277	-22.7584	-22.987	-24.6492				2014-08-02 16:00:00	0.476204	4.8
2015-04-27	-22.9096	-22.3049	-22.1769	-23.1424				2014-08-02 17:00:00	0.476204	4.8
2015-04-29	-22.5198	-21.8106	-21.6955	-23.2471				2014-08-02 18:00:00	0.476336	4.8
2015-05-01	-22.2338	-21.8427	-21.7687	-23.238				2014-08-02 19:00:00	0.4766	4.6
2015-05-03	-22.0419	-20.8757	-20.2671	-20.3733				2014-08-02 20:00:00	0.476732	4.5
2015-05-05	-21.498	-20.1013	-19.3283	-19.5915				2014-08-02 21:00:00	0.476995	4.4
2015-05-07	-20.9214	-19.2831	-18.2776	-19.1288				2014-08-02 22:00:00	0.477259	4.4
2015-05-09	-20.5391	-18.5899	-17.2625	-17.2122				2014-08-02 23:00:00	0.477521	4.3
2015-05-11	-20.0919	-18.0447	-16.5488	-16.7028				2014-08-03	0.477784	4.2
2015-05-13	-19.3549	-16.8467	-15.0555	-14.5247				2014-08-03 01:00:00	0.478046	4.1
2015-05-15	-18.6022	-15.9228	-13.8984	-12.6239				2014-08-03 02:00:00	0.478308	3.9
2015-05-17	-18.0907	-15.5638	-13.9562	-13.7246				2014-08-03 03:00:00	0.4787	3.7
2015-05-19	-17.6316	-14.4872	-12.1508	-10.6431				2014-08-03 04:00:00	0.479092	3.5
2015-05-21	-16.7654	-13.4998	-10.8916	-8.85817				2014-08-03 05:00:00	0.479482	3.3
2015-05-23	-16.3097	-13.5516	-11.8448	-11.3807				2014-08-03 06:00:00	0.479872	3.1
2015-05-25	-15.9217	-13.7082	-12.0607	-11.2397				2014-08-03 07:00:00	0.480262	2.9
2015-05-27	-15.3969	-13.7934	-11.9438	-10.7199				2014-08-03 08:00:00	0.480521	2.8
2015-05-29	-14.6793	-13.1942	-11.2353	-10.2494				2014-08-03 09:00:00	0.48078	2.8
2015-05-31	-12.4105	-11.5633	-8.48354	-6.09711				2014-08-03 10:00:00	0.480909	2.8
2015-06-02	-10.8003	-9.79427	-6.36549	-5.0836				2014-08-03 11:00:00	0.480909	2.8
2015-06-04	-9.86711	-9.30275	-6.04359	-4.57085				2014-08-03 12:00:00	0.480909	2.9
2015-06-06	-9.76878	-8.67421	-5.4039	-3.41242				2014-08-03 13:00:00	0.48078	3
2015-06-08	-8.88074	-7.31891	-4.11188	-2.86993				2014-08-03 14:00:00	0.48065	3
2015-06-10	-2.93225	-0.442444	-0.0427704	1.18921				2014-08-03 15:00:00	0.48065	3.1
2015-06-12	-2.47549	-0.405029	1.05104	1.06229				2014-08-03 16:00:00	0.480391	3.1
2015-06-14	-1.61575	1.75851	2.23666	1.93481				2014-08-03 17:00:00	0.480262	3.2
2015-06-16	-0.97995	3.2074	3.32501	2.79585				2014-08-03 18:00:00	0.480132	3.3
2015-06-18	-0.766159	1.88704	1.87648	1.65991				2014-08-03 19:00:00	0.479872	3.4
2015-06-20	-0.407974	7.04002	6.97784	6.44678				2014-08-03 20:00:00	0.480002	3.4
2015-06-22	-0.357025	3.19807	3.42253	3.23523				2014-08-03 21:00:00	0.48065	3.4
2015-06-24	-0.212234	3.58401	3.589	3.11832				2014-08-03 22:00:00	0.48065	3.4
2015-06-26	-0.191864	2.11874	2.17751	1.94257				2014-08-03 23:00:00	0.48078	3.4
								2014-08-04	0.480909	3.3
								2014-08-04 01:00:00	0.480909	3.3
								2014-08-04 02:00:00	0.481038	3.2
								2014-08-04 03:00:00	0.481167	3.2
								2014-08-04 04:00:00	0.481297	3.1
								2014-08-04 05:00:00	0.481426	3
								2014-08-04 06:00:00	0.481555	2.9
								2014-08-04 07:00:00	0.481812	2.8
								2014-08-04 08:00:00	0.481941	2.8
								2014-08-04 09:00:00	0.481941	2.8
								2014-08-04 10:00:00	0.482069	2.9
								2014-08-04 11:00:00	0.481812	3.1
								2014-08-04 12:00:00	0.481555	3.2
								2014-08-04 13:00:00	0.481167	3.4
								2014-08-04 14:00:00	0.480909	3.6
								2014-08-04 15:00:00	0.480521	3.8
								2014-08-04 16:00:00	0.480391	4
								2014-08-04 17:00:00	0.479872	4.2
								2014-08-04 18:00:00	0.479092	4.4
								2014-08-04 19:00:00	0.478831	4.6
								2014-08-04 20:00:00	0.478308	4.7
								2014-08-04 21:00:00	0.478177	4.8
								2014-08-04 22:00:00	0.478046	4.8
								2014-08-04 23:00:00	0.478046	4.8
								2014-08-05	0.478046	4.7
								2014-08-05 01:00:00	0.478177	4.7
								2014-08-05 02:00:00	0.478831	4.6
								2014-08-05 03:00:00	0.478961	4.5
								2014-08-05 04:00:00	0.479222	4.4
								2014-08-05 05:00:00	0.47857	4.2
								2014-08-05 06:00:00	0.478439	4.1
								2014-08-05 07:00:00	0.47857	4
								2014-08-05 08:00:00	0.47857	3.9
								2014-08-05 09:00:00	0.477521	3.8
								2014-08-05 10:00:00	0.47739	3.7
								2014-08-05 11:00:00	0.477259	3.7
								2014-08-05 12:00:00	0.477259	3.7
								2014-08-05 13:00:00	0.47739	3.6
								2014-08-05 14:00:00	0.47739	3.6
								2014-08-05 15:00:00	0.477521	3.7
								2014-08-05 16:00:00	0.477521	3.8
								2014-08-05 17:00:00	0.47739	4
								2014-08-05 18:00:00	0.477127	4.2
								2014-08-05 19:00:00	0.476864	4.3
								2014-08-05 20:00:00	0.4766	4.4
								2014-08-05 21:00:00	0.4766	4.4
								2014-08-05 22:00:00	0.4766	4.4
								2014-08-05 23:00:00	0.476732	4.4
								2014-08-06	0.476864	4.3
								2014-08-06 01:00:00	0.476995	4.2
								2014-08-06 02:00:00	0.477127	4.1
								2014-08-06 03:00:00	0.477259	4
								2014-08-06 04:00:00	0.477521	3.9
								2014-08-06 05:00:00	0.477521	3.8
								2014-08-06 06:00:00	0.477784	3.7
								2014-08-06 07:00:00	0.477915	3.6
								2014-08-06 08:00:00	0.478046	3.5
								2014-08-06 09:00:00	0.478046	3.5
								2014-08-06 10:00:00	0.478177	3.5
								2014-08-06 11:00:00	0.478177	3.5
								2014-08-06 12:00:00	0.478308	3.5
								2014-08-06 13:00:00	0.478439	3.7
								2014-08-06 14:00:00	0.478439	3.8
								2014-08-06 15:00:00	0.478439	4.1
								2014-08-06 16:00:00	0.478308	4.2
								2014-08-06 17:00:00	0.478308	4.4
								2014-08-06 18:00:00	0.478046	4.5
								2014-08-06 19:00:00	0.477784	4.6
								2014-08-06 20:00:00	0.477521	4.7
								2014-08-06 21:00:00	0.47739	4.8
								2014-08-06 22:00:00	0.477259	4.8
								2014-08-06 23:00:00	0.477127	4.8
								2014-08-07	0.477259	4.7
								2014-08-07 01:00:00	0.477259	4.6
								2014-08-07 02:00:00	0.477521	4.5
								2014-08-07 03:00:00	0.477653	4.3
								2014-08-07 04:00:00	0.477653	4.2
								2014-08-07 05:00:00	0.477915	4.1
								2014-08-07 06:00:00	0.478177	3.9
								2014-08-07 07:00:00	0.478177	3.8
								2014-08-07 08:00:00	0.478046	3.7
								2014-08-07 09:00:00	0.47739	3.6
								2014-08-07 10:00:00	0.476995	3.5
								2014-08-07 11:00:00	0.476995	3.5
								2014-08-07 12:00:00	0.477127	3.5
								2014-08-07 13:00:00	0.477259	3.5
								2014-08-07 14:00:00	0.476995	3.5
								2014-08-07 15:00:00	0.476468	3.5
								2014-08-07 16:00:00	0.476336	3.6
								2014-08-07 17:00:00	0.476204	3.7
								2014-08-07 18:00:00	0.476072	3.8
								2014-08-07 19:00:00	0.475939	3.8
								2014-08-07 20:00:00	0.475939	3.8
								2014-08-07 21:00:00	0.475939	3.7
								2014-08-07 22:00:00	0.475939	3.7
								2014-08-07 23:00:00	0.476072	3.6
								2014-08-08	0.476204	3.5
								2014-08-08 01:00:00	0.476336	3.4
								2014-08-08 02:00:00	0.4766	3.3
								2014-08-08 03:00:00	0.476732	3.2
								2014-08-08 04:00:00	0.477127	3.1
								2014-08-08 05:00:00	0.47739	3
								2014-08-08 06:00:00	0.477653	2.9
								2014-08-08 07:00:00	0.477915	2.8
								2014-08-08 08:00:00	0.478046	2.6
								2014-08-08 09:00:00	0.478308	2.5
								2014-08-08 10:00:00	0.47857	2.5
								2014-08-08 11:00:00	0.4787	2.6
								2014-08-08 12:00:00	0.4787	2.6
								2014-08-08 13:00:00	0.4787	2.7
								2014-08-08 14:00:00	0.4787	2.8
								2014-08-08 15:00:00	0.47857	3
								2014-08-08 16:00:00	0.47857	3.1
								2014-08-08 17:00:00	0.478439	3.3
								2014-08-08 18:00:00	0.478308	3.4
								2014-08-08 19:00:00	0.478308	3.5
								2014-08-08 20:00:00	0.478177	3.6
								2014-08-08 21:00:00	0.477521	3.6
								2014-08-08 22:00:00	0.477127	3.6
								2014-08-08 23:00:00	0.476864	3.5
								2014-08-09	0.476864	3.4
								2014-08-09 01:00:00	0.476864	3.4
								2014-08-09 02:00:00	0.476995	3.2
								2014-08-09 03:00:00	0.476995	3.1
								2014-08-09 04:00:00	0.477259	3
								2014-08-09 05:00:00	0.47739	2.9
								2014-08-09 06:00:00	0.477653	2.8
								2014-08-09 07:00:00	0.477784	2.7
								2014-08-09 08:00:00	0.477915	2.6
								2014-08-09 09:00:00	0.478177	2.6
								2014-08-09 10:00:00	0.478177	2.6
								2014-08-09 11:00:00	0.478308	2.6
								2014-08-09 12:00:00	0.478308	2.7
								2014-08-09 13:00:00	0.478308	2.9
								2014-08-09 14:00:00	0.478177	3
								2014-08-09 15:00:00	0.478046	3.2
								2014-08-09 16:00:00	0.477915	3.4
								2014-08-09 17:00:00	0.477784	3.5
								2014-08-09 18:00:00	0.477653	3.7
								2014-08-09 19:00:00	0.47739	3.9
								2014-08-09 20:00:00	0.477259	4
								2014-08-09 21:00:00	0.477127	4.1
								2014-08-09 22:00:00	0.477127	4.1
								2014-08-09 23:00:00	0.476995	4
								2014-08-10	0.476995	4
								2014-08-10 01:00:00	0.477127	3.8
								2014-08-10 02:00:00	0.477127	3.7
								2014-08-10 03:00:00	0.47739	3.6
								2014-08-10 04:00:00	0.477653	3.5
								2014-08-10 05:00:00	0.477653	3.3
								2014-08-10 06:00:00	0.477784	3.2
								2014-08-10 07:00:00	0.477784	3.1
								2014-08-10 08:00:00	0.477653	3
								2014-08-10 09:00:00	0.477653	3
								2014-08-10 10:00:00	0.477653	2.9
								2014-08-10 11:00:00	0.477653	2.9
								2014-08-10 12:00:00	0.477784	2.9
								2014-08-10 13:00:00	0.477915	3
								2014-08-10 14:00:00	0.477915	3
								2014-08-10 15:00:00	0.477915	3.1
								2014-08-10 16:00:00	0.477784	3.3
								2014-08-10 17:00:00	0.477653	3.4
								2014-08-10 18:00:00	0.477521	3.5
								2014-08-10 19:00:00	0.47739	3.5
								2014-08-10 20:00:00	0.477259	3.6
								2014-08-10 21:00:00	0.477259	3.5
								2014-08-10 22:00:00	0.477259	3.5
								2014-08-10 23:00:00	0.477259	3.5
								2014-08-11	0.47739	3.4
								2014-08-11 01:00:00	0.477521	3.3
								2014-08-11 02:00:00	0.477784	3.2
								2014-08-11 03:00:00	0.477915	3.1
								2014-08-11 04:00:00	0.478046	3
								2014-08-11 05:00:00	0.478308	2.9
								2014-08-11 06:00:00	0.4787	2.8
								2014-08-11 07:00:00	0.478961	2.7
								2014-08-11 08:00:00	0.479092	2.6
								2014-08-11 09:00:00	0.479352	2.5
								2014-08-11 10:00:00	0.479612	2.4
								2014-08-11 11:00:00	0.479872	2.4
								2014-08-11 12:00:00	0.480002	2.3
								2014-08-11 13:00:00	0.480132	2.3
								2014-08-11 14:00:00	0.480391	2.3
								2014-08-11 15:00:00	0.480521	2.3
								2014-08-11 16:00:00	0.480521	2.3
								2014-08-11 17:00:00	0.480521	2.3
								2014-08-11 18:00:00	0.48065	2.4
								2014-08-11 19:00:00	0.480521	2.4
								2014-08-11 20:00:00	0.48065	2.3
								2014-08-11 21:00:00	0.48065	2.3
								2014-08-11 22:00:00	0.48078	2.3
								2014-08-11 23:00:00	0.48078	2.3
								2014-08-12	0.48065	2.3
								2014-08-12 01:00:00	0.48065	2.2
								2014-08-12 02:00:00	0.48065	2.2
								2014-08-12 03:00:00	0.48065	2.2
								2014-08-12 04:00:00	0.48065	2.1
								2014-08-12 05:00:00	0.48078	2.1
								2014-08-12 06:00:00	0.480909	2
								2014-08-12 07:00:00	0.481038	2
								2014-08-12 08:00:00	0.481038	1.9
								2014-08-12 09:00:00	0.481167	1.9
								2014-08-12 10:00:00	0.481297	1.8
								2014-08-12 11:00:00	0.481426	1.7
								2014-08-12 12:00:00	0.481426	1.7
								2014-08-12 13:00:00	0.481555	1.8
								2014-08-12 14:00:00	0.481555	1.9
								2014-08-12 15:00:00	0.481555	1.9
								2014-08-12 16:00:00	0.481426	1.9
								2014-08-12 17:00:00	0.481297	2
								2014-08-12 18:00:00	0.481297	2
								2014-08-12 19:00:00	0.481167	2.1
								2014-08-12 20:00:00	0.481038	2.1
								2014-08-12 21:00:00	0.481038	2
								2014-08-12 22:00:00	0.481167	2
								2014-08-12 23:00:00	0.481167	2
								2014-08-13	0.481297	1.9
								2014-08-13 01:00:00	0.481426	1.9
								2014-08-13 02:00:00	0.481555	1.9
								2014-08-13 03:00:00	0.481683	1.8
								2014-08-13 04:00:00	0.481683	1.8
								2014-08-13 05:00:00	0.481812	1.7
								2014-08-13 06:00:00	0.481812	1.7
								2014-08-13 07:00:00	0.481941	1.7
								2014-08-13 08:00:00	0.482198	1.7
								2014-08-13 09:00:00	0.482327	1.6
								2014-08-13 10:00:00	0.482455	1.7
								2014-08-13 11:00:00	0.482327	1.7
								2014-08-13 12:00:00	0.482327	1.7
								2014-08-13 13:00:00	0.482455	1.7
								2014-08-13 14:00:00	0.482583	1.8
								2014-08-13 15:00:00	0.482711	1.8
								2014-08-13 16:00:00	0.48284	1.9
								2014-08-13 17:00:00	0.482968	2
								2014-08-13 18:00:00	0.482968	2
								2014-08-13 19:00:00	0.483096	2.1
								2014-08-13 20:00:00	0.483096	2.1
								2014-08-13 21:00:00	0.483096	2.2
								2014-08-13 22:00:00	0.483096	2.3
								2014-08-13 23:00:00	0.483096	2.3
								2014-08-14	0.483224	2.2
								2014-08-14 01:00:00	0.483224	2.2
								2014-08-14 02:00:00	0.483352	2.1
								2014-08-14 03:00:00	0.483607	2
								2014-08-14 04:00:00	0.483735	1.9
								2014-08-14 05:00:00	0.48399	1.8
								2014-08-14 06:00:00	0.484117	1.7
								2014-08-14 07:00:00	0.484372	1.7
								2014-08-14 08:00:00	0.484627	1.6
								2014-08-14 09:00:00	0.484754	1.6
								2014-08-14 10:00:00	0.484754	1.7
								2014-08-14 11:00:00	0.484754	1.8
								2014-08-14 12:00:00	0.484881	1.9
								2014-08-14 13:00:00	0.484754	2.1
								2014-08-14 14:00:00	0.484754	2.3
								2014-08-14 15:00:00	0.484627	2.4
								2014-08-14 16:00:00	0.484627	2.6
								2014-08-14 17:00:00	0.484499	2.8
								2014-08-14 18:00:00	0.484372	2.9
								2014-08-14 19:00:00	0.484372	3
								2014-08-14 20:00:00	0.484117	3.1
								2014-08-14 21:00:00	0.484117	3.2
								2014-08-14 22:00:00	0.484117	3.2
								2014-08-14 23:00:00	0.48399	3.2
								2014-08-15	0.484117	3.1
								2014-08-15 01:00:00	0.484245	3
								2014-08-15 02:00:00	0.484372	2.9
								2014-08-15 03:00:00	0.484627	2.7
								2014-08-15 04:00:00	0.484881	2.6
								2014-08-15 05:00:00	0.485135	2.5
								2014-08-15 06:00:00	0.485388	2.3
								2014-08-15 07:00:00	0.485641	2.2
								2014-08-15 08:00:00	0.486021	2.1
								2014-08-15 09:00:00	0.486147	2
								2014-08-15 10:00:00	0.486273	1.9
								2014-08-15 11:00:00	0.486652	1.8
								2014-08-15 12:00:00	0.486778	1.8
								2014-08-15 13:00:00	0.486904	1.9
								2014-08-15 14:00:00	0.486778	2.1
								2014-08-15 15:00:00	0.486526	2.3
								2014-08-15 16:00:00	0.486021	2.5
								2014-08-15 17:00:00	0.485641	2.7
								2014-08-15 18:00:00	0.485388	2.8
								2014-08-15 19:00:00	0.485135	2.9
								2014-08-15 20:00:00	0.485008	3
								2014-08-15 21:00:00	0.484754	3
								2014-08-15 22:00:00	0.485641	3
								2014-08-15 23:00:00	0.485768	3
								2014-08-16	0.485894	3
								2014-08-16 01:00:00	0.485894	2.9
								2014-08-16 02:00:00	0.486021	2.8
								2014-08-16 03:00:00	0.486147	2.6
								2014-08-16 04:00:00	0.4864	2.5
								2014-08-16 05:00:00	0.486526	2.4
								2014-08-16 06:00:00	0.486778	2.3
								2014-08-16 07:00:00	0.486904	2.2
								2014-08-16 08:00:00	0.487155	2.1
								2014-08-16 09:00:00	0.487407	2
								2014-08-16 10:00:00	0.487532	2
								2014-08-16 11:00:00	0.487532	2
								2014-08-16 12:00:00	0.487281	2
								2014-08-16 13:00:00	0.48703	2.1
								2014-08-16 14:00:00	0.486904	2.3
								2014-08-16 15:00:00	0.486652	2.4
								2014-08-16 16:00:00	0.486652	2.5
								2014-08-16 17:00:00	0.48703	2.7
								2014-08-16 18:00:00	0.487155	2.8
								2014-08-16 19:00:00	0.48703	2.9
								2014-08-16 20:00:00	0.48703	2.9
								2014-08-16 21:00:00	0.48703	3
								2014-08-16 22:00:00	0.487281	3
								2014-08-16 23:00:00	0.487407	2.9
								2014-08-17	0.487658	2.9
								2014-08-17 01:00:00	0.487783	2.8
								2014-08-17 02:00:00	0.488034	2.6
								2014-08-17 03:00:00	0.48841	2.5
								2014-08-17 04:00:00	0.48866	2.4
								2014-08-17 05:00:00	0.48891	2.3
								2014-08-17 06:00:00	0.489284	2.1
								2014-08-17 07:00:00	0.489533	2
								2014-08-17 08:00:00	0.489782	2
								2014-08-17 09:00:00	0.490155	1.9
								2014-08-17 10:00:00	0.490403	1.8
								2014-08-17 11:00:00	0.490527	1.7
								2014-08-17 12:00:00	0.490527	1.8
								2014-08-17 13:00:00	0.490279	1.9
								2014-08-17 14:00:00	0.489782	2.1
								2014-08-17 15:00:00	0.489533	2.3
								2014-08-17 16:00:00	0.489408	2.5
								2014-08-17 17:00:00	0.489159	2.7
								2014-08-17 18:00:00	0.48891	2.9
								2014-08-17 19:00:00	0.48866	3
								2014-08-17 20:00:00	0.48841	3.2
								2014-08-17 21:00:00	0.488034	3.2
								2014-08-17 22:00:00	0.487909	3.3
								2014-08-17 23:00:00	0.487909	3.3
								2014-08-18	0.487909	3.3
								2014-08-18 01:00:00	0.487909	3.3
								2014-08-18 02:00:00	0.488034	3.2
								2014-08-18 03:00:00	0.488285	3
								2014-08-18 04:00:00	0.488535	2.9
								2014-08-18 05:00:00	0.48866	2.8
								2014-08-18 06:00:00	0.48891	2.6
								2014-08-18 07:00:00	0.489159	2.5
								2014-08-18 08:00:00	0.489408	2.4
								2014-08-18 09:00:00	0.489906	2.2
								2014-08-18 10:00:00	0.490155	2.2
								2014-08-18 11:00:00	0.490155	2.1
								2014-08-18 12:00:00	0.490155	2.2
								2014-08-18 13:00:00	0.490031	2.2
								2014-08-18 14:00:00	0.489782	2.4
								2014-08-18 15:00:00	0.489533	2.5
								2014-08-18 16:00:00	0.489159	2.7
								2014-08-18 17:00:00	0.48891	2.9
								2014-08-18 18:00:00	0.48866	3
								2014-08-18 19:00:00	0.48841	3
								2014-08-18 20:00:00	0.488285	3.1
								2014-08-18 21:00:00	0.488034	3.1
								2014-08-18 22:00:00	0.488034	3.1
								2014-08-18 23:00:00	0.488159	3
								2014-08-19	0.488159	2.9
								2014-08-19 01:00:00	0.488285	2.9
								2014-08-19 02:00:00	0.48841	2.8
								2014-08-19 03:00:00	0.48841	2.7
								2014-08-19 04:00:00	0.48866	2.6
								2014-08-19 05:00:00	0.48866	2.5
								2014-08-19 06:00:00	0.48891	2.4
								2014-08-19 07:00:00	0.489034	2.3
								2014-08-19 08:00:00	0.489782	2.3
								2014-08-19 09:00:00	0.489906	2.3
								2014-08-19 10:00:00	0.488785	2.2
								2014-08-19 11:00:00	0.488785	2.2
								2014-08-19 12:00:00	0.488785	2.2
								2014-08-19 13:00:00	0.48866	2.3
								2014-08-19 14:00:00	0.488785	2.3
								2014-08-19 15:00:00	0.488535	2.4
								2014-08-19 16:00:00	0.48841	2.6
								2014-08-19 17:00:00	0.48841	2.6
								2014-08-19 18:00:00	0.48841	2.7
								2014-08-19 19:00:00	0.48841	2.8
								2014-08-19 20:00:00	0.48841	2.8
								2014-08-19 21:00:00	0.488535	2.8
								2014-08-19 22:00:00	0.48841	2.8
								2014-08-19 23:00:00	0.48866	2.8
								2014-08-20	0.488785	2.7
								2014-08-20 01:00:00	0.488785	2.7
								2014-08-20 02:00:00	0.48891	2.6
								2014-08-20 03:00:00	0.489034	2.6
								2014-08-20 04:00:00	0.489408	2.5
								2014-08-20 05:00:00	0.489658	2.5
								2014-08-20 06:00:00	0.489906	2.4
								2014-08-20 07:00:00	0.490155	2.4
								2014-08-20 08:00:00	0.490403	2.3
								2014-08-20 09:00:00	0.490527	2.3
								2014-08-20 10:00:00	0.490899	2.3
								2014-08-20 11:00:00	0.490899	2.2
								2014-08-20 12:00:00	0.491023	2.2
								2014-08-20 13:00:00	0.49127	2.2
								2014-08-20 14:00:00	0.49127	2.2
								2014-08-20 15:00:00	0.491518	2.2
								2014-08-20 16:00:00	0.491518	2.2
								2014-08-20 17:00:00	0.491888	2.2
								2014-08-20 18:00:00	0.492011	2.2
								2014-08-20 19:00:00	0.492135	2.2
								2014-08-20 20:00:00	0.492135	2.2
								2014-08-20 21:00:00	0.492135	2.2
								2014-08-20 22:00:00	0.492135	2.2
								2014-08-20 23:00:00	0.492258	2.2
								2014-08-21	0.492381	2.2
								2014-08-21 01:00:00	0.492627	2.2
								2014-08-21 02:00:00	0.49275	2.1
								2014-08-21 03:00:00	0.493119	2.1
								2014-08-21 04:00:00	0.493242	2.1
								2014-08-21 05:00:00	0.493487	2
								2014-08-21 06:00:00	0.493487	2
								2014-08-21 07:00:00	0.493732	1.9
								2014-08-21 08:00:00	0.493855	1.9
								2014-08-21 09:00:00	0.494222	1.8
								2014-08-21 10:00:00	0.494344	1.8
								2014-08-21 11:00:00	0.494222	1.8
								2014-08-21 12:00:00	0.494344	1.9
								2014-08-21 13:00:00	0.494222	1.9
								2014-08-21 14:00:00	0.494222	1.9
								2014-08-21 15:00:00	0.494466	2
								2014-08-21 16:00:00	0.494344	2
								2014-08-21 17:00:00	0.493977	2.1
								2014-08-21 18:00:00	0.493977	2.1
								2014-08-21 19:00:00	0.493732	2.2
								2014-08-21 20:00:00	0.493732	2.3
								2014-08-21 21:00:00	0.493732	2.3
								2014-08-21 22:00:00	0.493732	2.4
								2014-08-21 23:00:00	0.493732	2.4
								2014-08-22	0.493732	2.3
								2014-08-22 01:00:00	0.493855	2.3
								2014-08-22 02:00:00	0.493977	2.2
								2014-08-22 03:00:00	0.494099	2.2
								2014-08-22 04:00:00	0.494222	2.1
								2014-08-22 05:00:00	0.494344	2
								2014-08-22 06:00:00	0.494466	2
								2014-08-22 07:00:00	0.494955	1.9
								2014-08-22 08:00:00	0.495198	1.9
								2014-08-22 09:00:00	0.495442	1.8
								2014-08-22 10:00:00	0.495686	1.8
								2014-08-22 11:00:00	0.495929	1.9
								2014-08-22 12:00:00	0.495807	1.9
								2014-08-22 13:00:00	0.495686	2
								2014-08-22 14:00:00	0.495442	2.1
								2014-08-22 15:00:00	0.495198	2.2
								2014-08-22 16:00:00	0.494955	2.3
								2014-08-22 17:00:00	0.494588	2.4
								2014-08-22 18:00:00	0.494344	2.6
								2014-08-22 19:00:00	0.494344	2.6
								2014-08-22 20:00:00	0.494222	2.7
								2014-08-22 21:00:00	0.494344	2.7
								2014-08-22 22:00:00	0.494222	2.7
								2014-08-22 23:00:00	0.494344	2.7
								2014-08-23	0.494466	2.6
								2014-08-23 01:00:00	0.494588	2.5
								2014-08-23 02:00:00	0.494955	2.4
								2014-08-23 03:00:00	0.495198	2.3
								2014-08-23 04:00:00	0.49532	2.2
								2014-08-23 05:00:00	0.495564	2.2
								2014-08-23 06:00:00	0.495686	2.1
								2014-08-23 07:00:00	0.495929	2
								2014-08-23 08:00:00	0.49605	2
								2014-08-23 09:00:00	0.496172	1.9
								2014-08-23 10:00:00	0.496293	1.9
								2014-08-23 11:00:00	0.496172	1.9
								2014-08-23 12:00:00	0.496172	1.9
								2014-08-23 13:00:00	0.496293	2
								2014-08-23 14:00:00	0.496172	2
								2014-08-23 15:00:00	0.496172	2.1
								2014-08-23 16:00:00	0.495929	2.2
								2014-08-23 17:00:00	0.495686	2.3
								2014-08-23 18:00:00	0.495442	2.3
								2014-08-23 19:00:00	0.49532	2.4
								2014-08-23 20:00:00	0.49532	2.5
								2014-08-23 21:00:00	0.495198	2.5
								2014-08-23 22:00:00	0.495198	2.5
								2014-08-23 23:00:00	0.495198	2.5
								2014-08-24	0.495198	2.5
								2014-08-24 01:00:00	0.49532	2.4
								2014-08-24 02:00:00	0.495442	2.4
								2014-08-24 03:00:00	0.495442	2.3
								2014-08-24 04:00:00	0.495442	2.3
								2014-08-24 05:00:00	0.495686	2.2
								2014-08-24 06:00:00	0.495686	2.2
								2014-08-24 07:00:00	0.495929	2.1
								2014-08-24 08:00:00	0.495929	2.1
								2014-08-24 09:00:00	0.49605	2.1
								2014-08-24 10:00:00	0.496415	2.1
								2014-08-24 11:00:00	0.496293	2.1
								2014-08-24 12:00:00	0.49605	2.2
								2014-08-24 13:00:00	0.495686	2.3
								2014-08-24 14:00:00	0.495442	2.4
								2014-08-24 15:00:00	0.495198	2.6
								2014-08-24 16:00:00	0.494833	2.7
								2014-08-24 17:00:00	0.494588	2.9
								2014-08-24 18:00:00	0.494466	3
								2014-08-24 19:00:00	0.494466	3
								2014-08-24 20:00:00	0.491518	3.1
								2014-08-24 21:00:00	0.490651	3.1
								2014-08-24 22:00:00	0.490651	3.1
								2014-08-24 23:00:00	0.490527	3.1
								2014-08-25	0.490527	3
								2014-08-25 01:00:00	0.490527	3
								2014-08-25 02:00:00	0.490651	2.9
								2014-08-25 03:00:00	0.490651	2.9
								2014-08-25 04:00:00	0.490651	2.8
								2014-08-25 05:00:00	0.490651	2.8
								2014-08-25 06:00:00	0.490775	2.7
								2014-08-25 07:00:00	0.490899	2.7
								2014-08-25 08:00:00	0.491023	2.6
								2014-08-25 09:00:00	0.49127	2.5
								2014-08-25 10:00:00	0.49127	2.5
								2014-08-25 11:00:00	0.491394	2.5
								2014-08-25 12:00:00	0.491518	2.5
								2014-08-25 13:00:00	0.491641	2.5
								2014-08-25 14:00:00	0.491641	2.6
								2014-08-25 15:00:00	0.491641	2.6
								2014-08-25 16:00:00	0.491765	2.7
								2014-08-25 17:00:00	0.491641	2.8
								2014-08-25 18:00:00	0.491518	2.8
								2014-08-25 19:00:00	0.491518	2.8
								2014-08-25 20:00:00	0.491641	2.9
								2014-08-25 21:00:00	0.491641	2.8
								2014-08-25 22:00:00	0.491641	2.8
								2014-08-25 23:00:00	0.491765	2.7
								2014-08-26	0.491888	2.6
								2014-08-26 01:00:00	0.492011	2.5
								2014-08-26 02:00:00	0.492135	2.4
								2014-08-26 03:00:00	0.492381	2.3
								2014-08-26 04:00:00	0.492627	2.2
								2014-08-26 05:00:00	0.49275	2.1
								2014-08-26 06:00:00	0.493119	2
								2014-08-26 07:00:00	0.493364	1.9
								2014-08-26 08:00:00	0.49361	1.9
								2014-08-26 09:00:00	0.493855	1.8
								2014-08-26 10:00:00	0.494099	1.7
								2014-08-26 11:00:00	0.494344	1.7
								2014-08-26 12:00:00	0.494466	1.8
								2014-08-26 13:00:00	0.494588	1.9
								2014-08-26 14:00:00	0.494711	2.1
								2014-08-26 15:00:00	0.494588	2.2
								2014-08-26 16:00:00	0.494466	2.3
								2014-08-26 17:00:00	0.494588	2.4
								2014-08-26 18:00:00	0.494588	2.5
								2014-08-26 19:00:00	0.494466	2.6
								2014-08-26 20:00:00	0.494344	2.6
								2014-08-26 21:00:00	0.494344	2.7
								2014-08-26 22:00:00	0.494466	2.7
								2014-08-26 23:00:00	0.494466	2.7
								2014-08-27	0.494466	2.6
								2014-08-27 01:00:00	0.494588	2.6
								2014-08-27 02:00:00	0.494588	2.5
								2014-08-27 03:00:00	0.494833	2.4
								2014-08-27 04:00:00	0.495077	2.3
								2014-08-27 05:00:00	0.49532	2.2
								2014-08-27 06:00:00	0.495442	2.1
								2014-08-27 07:00:00	0.495686	2
								2014-08-27 08:00:00	0.495929	1.9
								2014-08-27 09:00:00	0.496293	1.9
								2014-08-27 10:00:00	0.496415	1.8
								2014-08-27 11:00:00	0.496657	1.7
								2014-08-27 12:00:00	0.496778	1.8
								2014-08-27 13:00:00	0.496778	1.9
								2014-08-27 14:00:00	0.496778	2
								2014-08-27 15:00:00	0.496657	2.1
								2014-08-27 16:00:00	0.496415	2.3
								2014-08-27 17:00:00	0.496172	2.5
								2014-08-27 18:00:00	0.495807	2.6
								2014-08-27 19:00:00	0.495564	2.8
								2014-08-27 20:00:00	0.495442	2.9
								2014-08-27 21:00:00	0.495198	3
								2014-08-27 22:00:00	0.495077	3
								2014-08-27 23:00:00	0.495077	3
								2014-08-28	0.495077	2.9
								2014-08-28 01:00:00	0.495077	2.8
								2014-08-28 02:00:00	0.49532	2.7
								2014-08-28 03:00:00	0.495564	2.6
								2014-08-28 04:00:00	0.495686	2.5
								2014-08-28 05:00:00	0.495807	2.4
								2014-08-28 06:00:00	0.49605	2.3
								2014-08-28 07:00:00	0.496172	2.2
								2014-08-28 08:00:00	0.496415	2.1
								2014-08-28 09:00:00	0.496536	2.1
								2014-08-28 10:00:00	0.496657	2.1
								2014-08-28 11:00:00	0.496778	2.1
								2014-08-28 12:00:00	0.496657	2.2
								2014-08-28 13:00:00	0.496657	2.3
								2014-08-28 14:00:00	0.496899	2.4
								2014-08-28 15:00:00	0.497384	2.5
								2014-08-28 16:00:00	0.497263	2.7
								2014-08-28 17:00:00	0.497021	2.8
								2014-08-28 18:00:00	0.496778	3
								2014-08-28 19:00:00	0.496536	3.1
								2014-08-28 20:00:00	0.496415	3.2
								2014-08-28 21:00:00	0.496172	3.3
								2014-08-28 22:00:00	0.49605	3.4
								2014-08-28 23:00:00	0.49605	3.4
								2014-08-29	0.49605	3.3
								2014-08-29 01:00:00	0.496172	3.3
								2014-08-29 02:00:00	0.496172	3.2
								2014-08-29 03:00:00	0.496415	3.1
								2014-08-29 04:00:00	0.496536	3
								2014-08-29 05:00:00	0.496778	2.8
								2014-08-29 06:00:00	0.497142	2.7
								2014-08-29 07:00:00	0.497263	2.5
								2014-08-29 08:00:00	0.497625	2.4
								2014-08-29 09:00:00	0.497867	2.3
								2014-08-29 10:00:00	0.498229	2.2
								2014-08-29 11:00:00	0.49847	2.1
								2014-08-29 12:00:00	0.498591	2
								2014-08-29 13:00:00	0.498591	2.1
								2014-08-29 14:00:00	0.49847	2.1
								2014-08-29 15:00:00	0.498108	2.3
								2014-08-29 16:00:00	0.497988	2.4
								2014-08-29 17:00:00	0.497746	2.5
								2014-08-29 18:00:00	0.497505	2.7
								2014-08-29 19:00:00	0.497263	2.8
								2014-08-29 20:00:00	0.497142	2.8
								2014-08-29 21:00:00	0.497142	2.8
								2014-08-29 22:00:00	0.497142	2.8
								2014-08-29 23:00:00	0.497142	2.8
								2014-08-30	0.497021	2.7
								2014-08-30 01:00:00	0.497263	2.5
								2014-08-30 02:00:00	0.497263	2.4
								2014-08-30 03:00:00	0.497505	2.3
								2014-08-30 04:00:00	0.497625	2.2
								2014-08-30 05:00:00	0.497988	2.1
								2014-08-30 06:00:00	0.498108	2
								2014-08-30 07:00:00	0.49847	1.9
								2014-08-30 08:00:00	0.498831	1.8
								2014-08-30 09:00:00	0.499192	1.7
								2014-08-30 10:00:00	0.499433	1.7
								2014-08-30 11:00:00	0.499673	1.6
								2014-08-30 12:00:00	0.499793	1.5
								2014-08-30 13:00:00	0.500033	1.5
								2014-08-30 14:00:00	0.500033	1.5
								2014-08-30 15:00:00	0.500033	1.5
								2014-08-30 16:00:00	0.500272	1.6
								2014-08-30 17:00:00	0.500392	1.7
								2014-08-30 18:00:00	0.500512	1.9
								2014-08-30 19:00:00	0.500272	2
								2014-08-30 20:00:00	0.500153	2.1
								2014-08-30 21:00:00	0.500153	2.2
								2014-08-30 22:00:00	0.500153	2.2
								2014-08-30 23:00:00	0.500153	2.2
								2014-08-31	0.500153	2.1
								2014-08-31 01:00:00	0.500392	2.1
								2014-08-31 02:00:00	0.500512	2
								2014-08-31 03:00:00	0.500751	1.9
								2014-08-31 04:00:00	0.500871	1.8
								2014-08-31 05:00:00	0.500871	1.7
								2014-08-31 06:00:00	0.500991	1.6
								2014-08-31 07:00:00	0.50111	1.6
								2014-08-31 08:00:00	0.501707	1.5
								2014-08-31 09:00:00	0.502184	1.4
								2014-08-31 10:00:00	0.502422	1.4
								2014-08-31 11:00:00	0.50266	1.3
								2014-08-31 12:00:00	0.503017	1.3
								2014-08-31 13:00:00	0.503136	1.2
								2014-08-31 14:00:00	0.503254	1.2
								2014-08-31 15:00:00	0.503136	1.2
								2014-08-31 16:00:00	0.503017	1.3
								2014-08-31 17:00:00	0.502779	1.4
								2014-08-31 18:00:00	0.502541	1.6
								2014-08-31 19:00:00	0.502422	1.7
								2014-08-31 20:00:00	0.502184	1.9
								2014-08-31 21:00:00	0.502184	2
								2014-08-31 22:00:00	0.502065	2
								2014-08-31 23:00:00	0.502065	2
								2014-09-01	0.502065	2
								2014-09-01 01:00:00	0.502065	1.9
								2014-09-01 02:00:00	0.502184	1.8
								2014-09-01 03:00:00	0.502184	1.8
								2014-09-01 04:00:00	0.502422	1.7
								2014-09-01 05:00:00	0.502541	1.6
								2014-09-01 06:00:00	0.50266	1.5
								2014-09-01 07:00:00	0.50266	1.5
								2014-09-01 08:00:00	0.502898	1.4
								2014-09-01 09:00:00	0.503136	1.4
								2014-09-01 10:00:00	0.503373	1.3
								2014-09-01 11:00:00	0.50361	1.3
								2014-09-01 12:00:00	0.503848	1.2
								2014-09-01 13:00:00	0.504795	1.2
								2014-09-01 14:00:00	0.50515	1.2
								2014-09-01 15:00:00	0.505268	1.2
								2014-09-01 16:00:00	0.504913	1.3
								2014-09-01 17:00:00	0.504795	1.4
								2014-09-01 18:00:00	0.504677	1.5
								2014-09-01 19:00:00	0.50444	1.7
								2014-09-01 20:00:00	0.504203	1.8
								2014-09-01 21:00:00	0.504085	1.9
								2014-09-01 22:00:00	0.503966	2
								2014-09-01 23:00:00	0.503848	2
								2014-09-02	0.503966	1.9
								2014-09-02 01:00:00	0.503966	1.9
								2014-09-02 02:00:00	0.503848	1.8
								2014-09-02 03:00:00	0.503966	1.7
								2014-09-02 04:00:00	0.504085	1.7
								2014-09-02 05:00:00	0.504203	1.6
								2014-09-02 06:00:00	0.504203	1.6
								2014-09-02 07:00:00	0.50444	1.5
								2014-09-02 08:00:00	0.504558	1.5
								2014-09-02 09:00:00	0.504795	1.4
								2014-09-02 10:00:00	0.504913	1.4
								2014-09-02 11:00:00	0.505032	1.4
								2014-09-02 12:00:00	0.505032	1.4
								2014-09-02 13:00:00	0.504913	1.4
								2014-09-02 14:00:00	0.504795	1.6
								2014-09-02 15:00:00	0.504558	1.7
								2014-09-02 16:00:00	0.504322	1.8
								2014-09-02 17:00:00	0.504085	1.9
								2014-09-02 18:00:00	0.503966	2
								2014-09-02 19:00:00	0.503848	2.1
								2014-09-02 20:00:00	0.503729	2.1
								2014-09-02 21:00:00	0.50361	2.1
								2014-09-02 22:00:00	0.50361	2.1
								2014-09-02 23:00:00	0.503492	2
								2014-09-03	0.503492	1.9
								2014-09-03 01:00:00	0.503492	1.9
								2014-09-03 02:00:00	0.50361	1.8
								2014-09-03 03:00:00	0.503729	1.7
								2014-09-03 04:00:00	0.503729	1.6
								2014-09-03 05:00:00	0.503848	1.5
								2014-09-03 06:00:00	0.503966	1.5
								2014-09-03 07:00:00	0.504085	1.4
								2014-09-03 08:00:00	0.504203	1.3
								2014-09-03 09:00:00	0.504203	1.3
								2014-09-03 10:00:00	0.504322	1.2
								2014-09-03 11:00:00	0.504558	1.2
								2014-09-03 12:00:00	0.504913	1.1
								2014-09-03 13:00:00	0.50515	1.1
								2014-09-03 14:00:00	0.505386	1.1
								2014-09-03 15:00:00	0.505622	1
								2014-09-03 16:00:00	0.50574	1
								2014-09-03 17:00:00	0.50574	1.1
								2014-09-03 18:00:00	0.505622	1.1
								2014-09-03 19:00:00	0.505622	1.2
								2014-09-03 20:00:00	0.505504	1.3
								2014-09-03 21:00:00	0.505504	1.3
								2014-09-03 22:00:00	0.505268	1.4
								2014-09-03 23:00:00	0.505386	1.3
								2014-09-04	0.505386	1.3
								2014-09-04 01:00:00	0.505386	1.3
								2014-09-04 02:00:00	0.505504	1.3
								2014-09-04 03:00:00	0.505504	1.2
								2014-09-04 04:00:00	0.505504	1.2
								2014-09-04 05:00:00	0.505504	1.2
								2014-09-04 06:00:00	0.505622	1.1
								2014-09-04 07:00:00	0.505622	1.1
								2014-09-04 08:00:00	0.505622	1.1
								2014-09-04 09:00:00	0.505858	1
								2014-09-04 10:00:00	0.505976	1
								2014-09-04 11:00:00	0.506447	1
								2014-09-04 12:00:00	0.506683	1
								2014-09-04 13:00:00	0.506683	1
								2014-09-04 14:00:00	0.506565	1.1
								2014-09-04 15:00:00	0.50633	1.2
								2014-09-04 16:00:00	0.506094	1.4
								2014-09-04 17:00:00	0.50574	1.6
								2014-09-04 18:00:00	0.505386	1.8
								2014-09-04 19:00:00	0.505032	1.9
								2014-09-04 20:00:00	0.504795	2
								2014-09-04 21:00:00	0.504795	2
								2014-09-04 22:00:00	0.504677	2
								2014-09-04 23:00:00	0.504677	2
								2014-09-05	0.504558	1.9
								2014-09-05 01:00:00	0.504677	1.8
								2014-09-05 02:00:00	0.504795	1.8
								2014-09-05 03:00:00	0.504913	1.7
								2014-09-05 04:00:00	0.504913	1.6
								2014-09-05 05:00:00	0.504913	1.5
								2014-09-05 06:00:00	0.50515	1.5
								2014-09-05 07:00:00	0.505268	1.4
								2014-09-05 08:00:00	0.505268	1.3
								2014-09-05 09:00:00	0.505386	1.3
								2014-09-05 10:00:00	0.505622	1.2
								2014-09-05 11:00:00	0.50574	1.2
								2014-09-05 12:00:00	0.506094	1.1
								2014-09-05 13:00:00	0.506447	1.1
								2014-09-05 14:00:00	0.506918	1.1
								2014-09-05 15:00:00	0.507036	1.1
								2014-09-05 16:00:00	0.507153	1.1
								2014-09-05 17:00:00	0.507036	1.2
								2014-09-05 18:00:00	0.506801	1.3
								2014-09-05 19:00:00	0.506565	1.5
								2014-09-05 20:00:00	0.50633	1.6
								2014-09-05 21:00:00	0.506212	1.8
								2014-09-05 22:00:00	0.506094	1.8
								2014-09-05 23:00:00	0.505976	1.9
								2014-09-06	0.505976	1.8
								2014-09-06 01:00:00	0.505976	1.8
								2014-09-06 02:00:00	0.505976	1.7
								2014-09-06 03:00:00	0.506094	1.6
								2014-09-06 04:00:00	0.506212	1.5
								2014-09-06 05:00:00	0.50633	1.5
								2014-09-06 06:00:00	0.506447	1.4
								2014-09-06 07:00:00	0.506447	1.4
								2014-09-06 08:00:00	0.506565	1.3
								2014-09-06 09:00:00	0.506801	1.3
								2014-09-06 10:00:00	0.507036	1.2
								2014-09-06 11:00:00	0.507388	1.2
								2014-09-06 12:00:00	0.507623	1.1
								2014-09-06 13:00:00	0.507741	1.1
								2014-09-06 14:00:00	0.507741	1.2
								2014-09-06 15:00:00	0.507741	1.3
								2014-09-06 16:00:00	0.507741	1.4
								2014-09-06 17:00:00	0.507623	1.5
								2014-09-06 18:00:00	0.507388	1.7
								2014-09-06 19:00:00	0.507271	1.8
								2014-09-06 20:00:00	0.507153	1.9
								2014-09-06 21:00:00	0.507036	1.9
								2014-09-06 22:00:00	0.507036	1.9
								2014-09-06 23:00:00	0.507036	1.9
								2014-09-07	0.507036	1.9
								2014-09-07 01:00:00	0.507271	1.8
								2014-09-07 02:00:00	0.507506	1.8
								2014-09-07 03:00:00	0.507623	1.7
								2014-09-07 04:00:00	0.507858	1.6
								2014-09-07 05:00:00	0.508093	1.6
								2014-09-07 06:00:00	0.508562	1.5
								2014-09-07 07:00:00	0.509031	1.4
								2014-09-07 08:00:00	0.509265	1.4
								2014-09-07 09:00:00	0.509616	1.3
								2014-09-07 10:00:00	0.509849	1.3
								2014-09-07 11:00:00	0.510083	1.3
								2014-09-07 12:00:00	0.510083	1.3
								2014-09-07 13:00:00	0.510083	1.3
								2014-09-07 14:00:00	0.509966	1.4
								2014-09-07 15:00:00	0.509966	1.5
								2014-09-07 16:00:00	0.509966	1.6
								2014-09-07 17:00:00	0.509733	1.7
								2014-09-07 18:00:00	0.509616	1.7
								2014-09-07 19:00:00	0.509499	1.8
								2014-09-07 20:00:00	0.509499	1.9
								2014-09-07 21:00:00	0.509382	1.9
								2014-09-07 22:00:00	0.509382	1.8
								2014-09-07 23:00:00	0.509265	1.8
								2014-09-08	0.509382	1.7
								2014-09-08 01:00:00	0.509382	1.6
								2014-09-08 02:00:00	0.509382	1.6
								2014-09-08 03:00:00	0.509265	1.5
								2014-09-08 04:00:00	0.509382	1.4
								2014-09-08 05:00:00	0.509499	1.4
								2014-09-08 06:00:00	0.509499	1.3
								2014-09-08 07:00:00	0.509382	1.3
								2014-09-08 08:00:00	0.509499	1.2
								2014-09-08 09:00:00	0.509499	1.2
								2014-09-08 10:00:00	0.509616	1.1
								2014-09-08 11:00:00	0.509733	1.1
								2014-09-08 12:00:00	0.509849	1
								2014-09-08 13:00:00	0.510083	1
								2014-09-08 14:00:00	0.510317	0.9
								2014-09-08 15:00:00	0.510784	0.9
								2014-09-08 16:00:00	0.51125	0.9
								2014-09-08 17:00:00	0.5116	0.8
								2014-09-08 18:00:00	0.511716	0.8
								2014-09-08 19:00:00	0.511949	0.8
								2014-09-08 20:00:00	0.512065	0.8
								2014-09-08 21:00:00	0.512065	0.8
								2014-09-08 22:00:00	0.512065	0.7
								2014-09-08 23:00:00	0.511949	0.7
								2014-09-09	0.511949	0.7
								2014-09-09 01:00:00	0.511949	0.7
								2014-09-09 02:00:00	0.511949	0.7
								2014-09-09 03:00:00	0.511833	0.7
								2014-09-09 04:00:00	0.511716	0.7
								2014-09-09 05:00:00	0.506565	0.6
								2014-09-09 06:00:00	0.503136	0.6
								2014-09-09 07:00:00	0.50266	0.6
								2014-09-09 08:00:00	0.502303	0.6
								2014-09-09 09:00:00	0.502065	0.6
								2014-09-09 10:00:00	0.501826	0.6
								2014-09-09 11:00:00	0.501826	0.6
								2014-09-09 12:00:00	0.501468	0.6
								2014-09-09 13:00:00	0.500871	0.6
								2014-09-09 14:00:00	0.500871	0.6
								2014-09-09 15:00:00	0.500871	0.6
								2014-09-09 16:00:00	0.500991	0.6
								2014-09-09 17:00:00	0.50111	0.6
								2014-09-09 18:00:00	0.501349	0.5
								2014-09-09 19:00:00	0.501588	0.5
								2014-09-09 20:00:00	0.501707	0.5
								2014-09-09 21:00:00	0.501826	0.5
								2014-09-09 22:00:00	0.501707	0.5
								2014-09-09 23:00:00	0.501588	0.5
								2014-09-10	0.501468	0.5
								2014-09-10 01:00:00	0.501349	0.5
								2014-09-10 02:00:00	0.50123	0.5
								2014-09-10 03:00:00	0.50111	0.5
								2014-09-10 04:00:00	0.500991	0.5
								2014-09-10 05:00:00	0.500991	0.5
								2014-09-10 06:00:00	0.500632	0.5
								2014-09-10 07:00:00	0.500392	0.5
								2014-09-10 08:00:00	0.500272	0.5
								2014-09-10 09:00:00	0.500153	0.5
								2014-09-10 10:00:00	0.500153	0.5
								2014-09-10 11:00:00	0.499913	0.5
								2014-09-10 12:00:00	0.499673	0.5
								2014-09-10 13:00:00	0.499673	0.5
								2014-09-10 14:00:00	0.499673	0.5
								2014-09-10 15:00:00	0.499793	0.5
								2014-09-10 16:00:00	0.499793	0.5
								2014-09-10 17:00:00	0.499793	0.5
								2014-09-10 18:00:00	0.499913	0.5
								2014-09-10 19:00:00	0.499793	0.5
								2014-09-10 20:00:00	0.499913	0.5
								2014-09-10 21:00:00	0.499913	0.5
								2014-09-10 22:00:00	0.499793	0.5
								2014-09-10 23:00:00	0.499793	0.5
								2014-09-11	0.499673	0.5
								2014-09-11 01:00:00	0.499553	0.5
								2014-09-11 02:00:00	0.499433	0.5
								2014-09-11 03:00:00	0.499312	0.5
								2014-09-11 04:00:00	0.499192	0.5
								2014-09-11 05:00:00	0.498952	0.5
								2014-09-11 06:00:00	0.498952	0.5
								2014-09-11 07:00:00	0.498591	0.5
								2014-09-11 08:00:00	0.49847	0.5
								2014-09-11 09:00:00	0.498229	0.5
								2014-09-11 10:00:00	0.498229	0.5
								2014-09-11 11:00:00	0.497988	0.5
								2014-09-11 12:00:00	0.497867	0.5
								2014-09-11 13:00:00	0.497746	0.5
								2014-09-11 14:00:00	0.497746	0.5
								2014-09-11 15:00:00	0.497746	0.5
								2014-09-11 16:00:00	0.497625	0.5
								2014-09-11 17:00:00	0.497625	0.5
								2014-09-11 18:00:00	0.497625	0.5
								2014-09-11 19:00:00	0.497625	0.5
								2014-09-11 20:00:00	0.497625	0.5
								2014-09-11 21:00:00	0.497505	0.5
								2014-09-11 22:00:00	0.497505	0.5
								2014-09-11 23:00:00	0.497384	0.5
								2014-09-12	0.497384	0.5
								2014-09-12 01:00:00	0.497263	0.5
								2014-09-12 02:00:00	0.497142	0.5
								2014-09-12 03:00:00	0.497021	0.5
								2014-09-12 04:00:00	0.496657	0.5
								2014-09-12 05:00:00	0.496415	0.5
								2014-09-12 06:00:00	0.496172	0.5
								2014-09-12 07:00:00	0.495929	0.5
								2014-09-12 08:00:00	0.495564	0.5
								2014-09-12 09:00:00	0.495442	0.5
								2014-09-12 10:00:00	0.495198	0.5
								2014-09-12 11:00:00	0.495077	0.5
								2014-09-12 12:00:00	0.494955	0.5
								2014-09-12 13:00:00	0.494955	0.5
								2014-09-12 14:00:00	0.494955	0.5
								2014-09-12 15:00:00	0.494955	0.5
								2014-09-12 16:00:00	0.494955	0.5
								2014-09-12 17:00:00	0.494955	0.5
								2014-09-12 18:00:00	0.494955	0.5
								2014-09-12 19:00:00	0.494955	0.5
								2014-09-12 20:00:00	0.494955	0.5
								2014-09-12 21:00:00	0.494955	0.5
								2014-09-12 22:00:00	0.494955	0.5
								2014-09-12 23:00:00	0.494955	0.5
								2014-09-13	0.494955	0.5
								2014-09-13 01:00:00	0.494955	0.5
								2014-09-13 02:00:00	0.494955	0.5
								2014-09-13 03:00:00	0.494955	0.5
								2014-09-13 04:00:00	0.495077	0.5
								2014-09-13 05:00:00	0.495077	0.5
								2014-09-13 06:00:00	0.495077	0.5
								2014-09-13 07:00:00	0.495077	0.5
								2014-09-13 08:00:00	0.495077	0.5
								2014-09-13 09:00:00	0.495077	0.5
								2014-09-13 10:00:00	0.495198	0.5
								2014-09-13 11:00:00	0.49532	0.5
								2014-09-13 12:00:00	0.495198	0.5
								2014-09-13 13:00:00	0.49532	0.5
								2014-09-13 14:00:00	0.49532	0.5
								2014-09-13 15:00:00	0.495442	0.5
								2014-09-13 16:00:00	0.495442	0.5
								2014-09-13 17:00:00	0.495564	0.5
								2014-09-13 18:00:00	0.495564	0.5
								2014-09-13 19:00:00	0.495686	0.5
								2014-09-13 20:00:00	0.495807	0.5
								2014-09-13 21:00:00	0.495807	0.5
								2014-09-13 22:00:00	0.495929	0.5
								2014-09-13 23:00:00	0.495929	0.5
								2014-09-14	0.49605	0.5
								2014-09-14 01:00:00	0.496172	0.5
								2014-09-14 02:00:00	0.496172	0.5
								2014-09-14 03:00:00	0.496293	0.5
								2014-09-14 04:00:00	0.496415	0.5
								2014-09-14 05:00:00	0.496536	0.5
								2014-09-14 06:00:00	0.496657	0.5
								2014-09-14 07:00:00	0.496899	0.5
								2014-09-14 08:00:00	0.497021	0.5
								2014-09-14 09:00:00	0.497021	0.5
								2014-09-14 10:00:00	0.497142	0.5
								2014-09-14 11:00:00	0.497142	0.5
								2014-09-14 12:00:00	0.497142	0.5
								2014-09-14 13:00:00	0.497263	0.5
								2014-09-14 14:00:00	0.497263	0.5
								2014-09-14 15:00:00	0.497263	0.5
								2014-09-14 16:00:00	0.497384	0.5
								2014-09-14 17:00:00	0.497384	0.5
								2014-09-14 18:00:00	0.497505	0.5
								2014-09-14 19:00:00	0.497625	0.5
								2014-09-14 20:00:00	0.497746	0.5
								2014-09-14 21:00:00	0.497867	0.5
								2014-09-14 22:00:00	0.497988	0.5
								2014-09-14 23:00:00	0.497988	0.5
								2014-09-15	0.498108	0.5
								2014-09-15 01:00:00	0.498108	0.5
								2014-09-15 02:00:00	0.498108	0.5
								2014-09-15 03:00:00	0.498229	0.5
								2014-09-15 04:00:00	0.498229	0.5
								2014-09-15 05:00:00	0.49835	0.5
								2014-09-15 06:00:00	0.49835	0.5
								2014-09-15 07:00:00	0.49847	0.5
								2014-09-15 08:00:00	0.49847	0.5
								2014-09-15 09:00:00	0.498591	0.5
								2014-09-15 10:00:00	0.498591	0.5
								2014-09-15 11:00:00	0.498591	0.5
								2014-09-15 12:00:00	0.498711	0.5
								2014-09-15 13:00:00	0.498831	0.5
								2014-09-15 14:00:00	0.498831	0.5
								2014-09-15 15:00:00	0.498952	0.5
								2014-09-15 16:00:00	0.498952	0.5
								2014-09-15 17:00:00	0.499072	0.5
								2014-09-15 18:00:00	0.499072	0.5
								2014-09-15 19:00:00	0.499192	0.5
								2014-09-15 20:00:00	0.499192	0.5
								2014-09-15 21:00:00	0.499192	0.5
								2014-09-15 22:00:00	0.499312	0.5
								2014-09-15 23:00:00	0.499312	0.5
								2014-09-16	0.499312	0.5
								2014-09-16 01:00:00	0.499433	0.5
								2014-09-16 02:00:00	0.499553	0.5
								2014-09-16 03:00:00	0.499553	0.5
								2014-09-16 04:00:00	0.499553	0.5
								2014-09-16 05:00:00	0.499553	0.5
								2014-09-16 06:00:00	0.499673	0.5
								2014-09-16 07:00:00	0.499673	0.5
								2014-09-16 08:00:00	0.499793	0.5
								2014-09-16 09:00:00	0.499913	0.5
								2014-09-16 10:00:00	0.500033	0.5
								2014-09-16 11:00:00	0.500033	0.5
								2014-09-16 12:00:00	0.499913	0.5
								2014-09-16 13:00:00	0.499913	0.5
								2014-09-16 14:00:00	0.499913	0.5
								2014-09-16 15:00:00	0.499913	0.5
								2014-09-16 16:00:00	0.499913	0.5
								2014-09-16 17:00:00	0.499913	0.5
								2014-09-16 18:00:00	0.500033	0.5
								2014-09-16 19:00:00	0.500153	0.5
								2014-09-16 20:00:00	0.500272	0.5
								2014-09-16 21:00:00	0.500272	0.5
								2014-09-16 22:00:00	0.500392	0.5
								2014-09-16 23:00:00	0.500392	0.5
								2014-09-17	0.500632	0.5
								2014-09-17 01:00:00	0.500632	0.5
								2014-09-17 02:00:00	0.500751	0.5
								2014-09-17 03:00:00	0.500871	0.5
								2014-09-17 04:00:00	0.500871	0.5
								2014-09-17 05:00:00	0.500871	0.5
								2014-09-17 06:00:00	0.500751	0.5
								2014-09-17 07:00:00	0.500632	0.5
								2014-09-17 08:00:00	0.500512	0.5
								2014-09-17 09:00:00	0.500392	0.5
								2014-09-17 10:00:00	0.500153	0.5
								2014-09-17 11:00:00	0.500033	0.5
								2014-09-17 12:00:00	0.500033	0.5
								2014-09-17 13:00:00	0.500033	0.5
								2014-09-17 14:00:00	0.500153	0.5
								2014-09-17 15:00:00	0.500033	0.5
								2014-09-17 16:00:00	0.499793	0.5
								2014-09-17 17:00:00	0.499553	0.5
								2014-09-17 18:00:00	0.499553	0.5
								2014-09-17 19:00:00	0.499553	0.5
								2014-09-17 20:00:00	0.500033	0.5
								2014-09-17 21:00:00	0.500272	0.5
								2014-09-17 22:00:00	0.500272	0.5
								2014-09-17 23:00:00	0.500272	0.5
								2014-09-18	0.500153	0.5
								2014-09-18 01:00:00	0.499913	0.5
								2014-09-18 02:00:00	0.499793	0.5
								2014-09-18 03:00:00	0.499553	0.5
								2014-09-18 04:00:00	0.499312	0.5
								2014-09-18 05:00:00	0.499192	0.5
								2014-09-18 06:00:00	0.498831	0.5
								2014-09-18 07:00:00	0.498711	0.5
								2014-09-18 08:00:00	0.49835	0.5
								2014-09-18 09:00:00	0.497867	0.5
								2014-09-18 10:00:00	0.497625	0.5
								2014-09-18 11:00:00	0.497384	0.5
								2014-09-18 12:00:00	0.497142	0.5
								2014-09-18 13:00:00	0.497021	0.5
								2014-09-18 14:00:00	0.496778	0.5
								2014-09-18 15:00:00	0.496657	0.5
								2014-09-18 16:00:00	0.496657	0.5
								2014-09-18 17:00:00	0.496657	0.5
								2014-09-18 18:00:00	0.496536	0.5
								2014-09-18 19:00:00	0.496536	0.5
								2014-09-18 20:00:00	0.496415	0.5
								2014-09-18 21:00:00	0.496536	0.5
								2014-09-18 22:00:00	0.496536	0.5
								2014-09-18 23:00:00	0.496536	0.5
								2014-09-19	0.496415	0.5
								2014-09-19 01:00:00	0.496536	0.5
								2014-09-19 02:00:00	0.496536	0.5
								2014-09-19 03:00:00	0.496536	0.5
								2014-09-19 04:00:00	0.495807	0.5
								2014-09-19 05:00:00	0.497384	0.5
								2014-09-19 06:00:00	0.497988	0.5
								2014-09-19 07:00:00	0.498229	0.5
								2014-09-19 08:00:00	0.49835	0.5
								2014-09-19 09:00:00	0.49835	0.5
								2014-09-19 10:00:00	0.49847	0.5
								2014-09-19 11:00:00	0.498591	0.5
								2014-09-19 12:00:00	0.498591	0.5
								2014-09-19 13:00:00	0.498831	0.5
								2014-09-19 14:00:00	0.499312	0.5
								2014-09-19 15:00:00	0.499793	0.5
								2014-09-19 16:00:00	0.499913	0.5
								2014-09-19 17:00:00	0.500033	0.5
								2014-09-19 18:00:00	0.500392	0.5
								2014-09-19 19:00:00	0.500632	0.5
								2014-09-19 20:00:00	0.50111	0.5
								2014-09-19 21:00:00	0.502303	0.5
								2014-09-19 22:00:00	0.502779	0.5
								2014-09-19 23:00:00	0.503017	0.5
								2014-09-20	0.503017	0.5
								2014-09-20 01:00:00	0.503373	0.5
								2014-09-20 02:00:00	0.50361	0.5
								2014-09-20 03:00:00	0.50361	0.5
								2014-09-20 04:00:00	0.503729	0.5
								2014-09-20 05:00:00	0.503966	0.5
								2014-09-20 06:00:00	0.504085	0.5
								2014-09-20 07:00:00	0.504203	0.5
								2014-09-20 08:00:00	0.504558	0.5
								2014-09-20 09:00:00	0.504677	0.5
								2014-09-20 10:00:00	0.504677	0.5
								2014-09-20 11:00:00	0.504677	0.5
								2014-09-20 12:00:00	0.504677	0.5
								2014-09-20 13:00:00	0.505622	0.5
								2014-09-20 14:00:00	0.505976	0.5
								2014-09-20 15:00:00	0.50633	0.5
								2014-09-20 16:00:00	0.506683	0.5
								2014-09-20 17:00:00	0.506801	0.5
								2014-09-20 18:00:00	0.507153	0.5
								2014-09-20 19:00:00	0.507506	0.5
								2014-09-20 20:00:00	0.507623	0.5
								2014-09-20 21:00:00	0.507858	0.5
								2014-09-20 22:00:00	0.507976	0.5
								2014-09-20 23:00:00	0.50821	0.5
								2014-09-21	0.508445	0.5
								2014-09-21 01:00:00	0.508679	0.5
								2014-09-21 02:00:00	0.508914	0.5
								2014-09-21 03:00:00	0.509382	0.5
								2014-09-21 04:00:00	0.509733	0.5
								2014-09-21 05:00:00	0.509966	0.5
								2014-09-21 06:00:00	0.509966	0.5
								2014-09-21 07:00:00	0.510083	0.5
								2014-09-21 08:00:00	0.5102	0.5
								2014-09-21 09:00:00	0.510434	0.5
								2014-09-21 10:00:00	0.51055	0.5
								2014-09-21 11:00:00	0.5109	0.5
								2014-09-21 12:00:00	0.511483	0.5
								2014-09-21 13:00:00	0.512182	0.5
								2014-09-21 14:00:00	0.512298	0.5
								2014-09-21 15:00:00	0.512531	0.5
								2014-09-21 16:00:00	0.51288	0.5
								2014-09-21 17:00:00	0.513925	0.5
								2014-09-21 18:00:00	0.515084	0.5
								2014-09-21 19:00:00	0.515663	0.5
								2014-09-21 20:00:00	0.51601	0.5
								2014-09-21 21:00:00	0.516242	0.5
								2014-09-21 22:00:00	0.516473	0.5
								2014-09-21 23:00:00	0.517166	0.5
								2014-09-22	0.517859	0.5
								2014-09-22 01:00:00	0.517975	0.5
								2014-09-22 02:00:00	0.518321	0.5
								2014-09-22 03:00:00	0.518321	0.5
								2014-09-22 04:00:00	0.518552	0.5
								2014-09-22 05:00:00	0.518783	0.5
								2014-09-22 06:00:00	0.518898	0.5
								2014-09-22 07:00:00	0.519244	0.5
								2014-09-22 08:00:00	0.519244	0.5
								2014-09-22 09:00:00	0.519475	0.5
								2014-09-22 10:00:00	0.519705	0.5
								2014-09-22 11:00:00	0.51982	0.5
								2014-09-22 12:00:00	0.520166	0.5
								2014-09-22 13:00:00	0.520512	0.5
								2014-09-22 14:00:00	0.520627	0.5
								2014-09-22 15:00:00	0.520857	0.5
								2014-09-22 16:00:00	0.520857	0.5
								2014-09-22 17:00:00	0.521088	0.5
								2014-09-22 18:00:00	0.521088	0.5
								2014-09-22 19:00:00	0.521203	0.5
								2014-09-22 20:00:00	0.521548	0.5
								2014-09-22 21:00:00	0.521663	0.5
								2014-09-22 22:00:00	0.521778	0.5
								2014-09-22 23:00:00	0.521894	0.5
								2014-09-23	0.521778	0.5
								2014-09-23 01:00:00	0.522009	0.5
								2014-09-23 02:00:00	0.522009	0.5
								2014-09-23 03:00:00	0.522124	0.5
								2014-09-23 04:00:00	0.522239	0.5
								2014-09-23 05:00:00	0.522239	0.5
								2014-09-23 06:00:00	0.522354	0.5
								2014-09-23 07:00:00	0.522469	0.5
								2014-09-23 08:00:00	0.522469	0.5
								2014-09-23 09:00:00	0.522469	0.5
								2014-09-23 10:00:00	0.522699	0.5
								2014-09-23 11:00:00	0.522814	0.5
								2014-09-23 12:00:00	0.522929	0.5
								2014-09-23 13:00:00	0.523159	0.5
								2014-09-23 14:00:00	0.523274	0.5
								2014-09-23 15:00:00	0.523389	0.5
								2014-09-23 16:00:00	0.523389	0.5
								2014-09-23 17:00:00	0.523619	0.5
								2014-09-23 18:00:00	0.523619	0.5
								2014-09-23 19:00:00	0.523965	0.5
								2014-09-23 20:00:00	0.52408	0.5
								2014-09-23 21:00:00	0.524195	0.5
								2014-09-23 22:00:00	0.524195	0.5
								2014-09-23 23:00:00	0.52431	0.5
								2014-09-24	0.52454	0.5
								2014-09-24 01:00:00	0.524425	0.5
								2014-09-24 02:00:00	0.524425	0.5
								2014-09-24 03:00:00	0.52454	0.5
								2014-09-24 04:00:00	0.52454	0.5
								2014-09-24 05:00:00	0.52454	0.5
								2014-09-24 06:00:00	0.524655	0.5
								2014-09-24 07:00:00	0.52477	0.5
								2014-09-24 08:00:00	0.524885	0.5
								2014-09-24 09:00:00	0.52477	0.5
								2014-09-24 10:00:00	0.52477	0.5
								2014-09-24 11:00:00	0.524655	0.5
								2014-09-24 12:00:00	0.524655	0.5
								2014-09-24 13:00:00	0.524655	0.5
								2014-09-24 14:00:00	0.52477	0.5
								2014-09-24 15:00:00	0.52477	0.5
								2014-09-24 16:00:00	0.524655	0.5
								2014-09-24 17:00:00	0.52477	0.5
								2014-09-24 18:00:00	0.524655	0.5
								2014-09-24 19:00:00	0.52477	0.5
								2014-09-24 20:00:00	0.52477	0.5
								2014-09-24 21:00:00	0.52477	0.5
								2014-09-24 22:00:00	0.52477	0.5
								2014-09-24 23:00:00	0.524885	0.5
								2014-09-25	0.521318	0.5
								2014-09-25 01:00:00	0.51982	0.5
								2014-09-25 02:00:00	0.519705	0.5
								2014-09-25 03:00:00	0.51959	0.5
								2014-09-25 04:00:00	0.519475	0.5
								2014-09-25 05:00:00	0.519359	0.5
								2014-09-25 06:00:00	0.519244	0.5
								2014-09-25 07:00:00	0.519129	0.5
								2014-09-25 08:00:00	0.519013	0.5
								2014-09-25 09:00:00	0.518898	0.5
								2014-09-25 10:00:00	0.518898	0.5
								2014-09-25 11:00:00	0.518667	0.5
								2014-09-25 12:00:00	0.518552	0.5
								2014-09-25 13:00:00	0.518552	0.5
								2014-09-25 14:00:00	0.518206	0.5
								2014-09-25 15:00:00	0.51809	0.5
								2014-09-25 16:00:00	0.517975	0.5
								2014-09-25 17:00:00	0.517744	0.5
								2014-09-25 18:00:00	0.517513	0.5
								2014-09-25 19:00:00	0.517398	0.5
								2014-09-25 20:00:00	0.517398	0.5
								2014-09-25 21:00:00	0.517282	0.5
								2014-09-25 22:00:00	0.517166	0.5
								2014-09-25 23:00:00	0.517051	0.5
								2014-09-26	0.516935	0.5
								2014-09-26 01:00:00	0.51682	0.5
								2014-09-26 02:00:00	0.516704	0.5
								2014-09-26 03:00:00	0.516589	0.5
								2014-09-26 04:00:00	0.516473	0.5
								2014-09-26 05:00:00	0.516357	0.5
								2014-09-26 06:00:00	0.516242	0.5
								2014-09-26 07:00:00	0.516126	0.5
								2014-09-26 08:00:00	0.51601	0.5
								2014-09-26 09:00:00	0.515779	0.5
								2014-09-26 10:00:00	0.515663	0.5
								2014-09-26 11:00:00	0.515547	0.5
								2014-09-26 12:00:00	0.515547	0.5
								2014-09-26 13:00:00	0.515432	0.5
								2014-09-26 14:00:00	0.5152	0.5
								2014-09-26 15:00:00	0.515084	0.5
								2014-09-26 16:00:00	0.514968	0.5
								2014-09-26 17:00:00	0.514852	0.5
								2014-09-26 18:00:00	0.514737	0.5
								2014-09-26 19:00:00	0.514737	0.5
								2014-09-26 20:00:00	0.514621	0.5
								2014-09-26 21:00:00	0.514389	0.5
								2014-09-26 22:00:00	0.514273	0.5
								2014-09-26 23:00:00	0.514273	0.5
								2014-09-27	0.514157	0.5
								2014-09-27 01:00:00	0.514041	0.5
								2014-09-27 02:00:00	0.513809	0.5
								2014-09-27 03:00:00	0.513577	0.5
								2014-09-27 04:00:00	0.513577	0.5
								2014-09-27 05:00:00	0.513344	0.5
								2014-09-27 06:00:00	0.513228	0.5
								2014-09-27 07:00:00	0.512996	0.5
								2014-09-27 08:00:00	0.49847	0.5
								2014-09-27 09:00:00	0.447044	0.5
								2014-09-27 10:00:00	0.44581	0.5
								2014-09-27 11:00:00	0.445035	0.5
								2014-09-27 12:00:00	0.444412	0.5
								2014-09-27 13:00:00	0.4441	0.5
								2014-09-27 14:00:00	0.443787	0.5
								2014-09-27 15:00:00	0.443474	0.5
								2014-09-27 16:00:00	0.443003	0.5
								2014-09-27 17:00:00	0.442689	0.5
								2014-09-27 18:00:00	0.442374	0.5
								2014-09-27 19:00:00	0.4419	0.5
								2014-09-27 20:00:00	0.441584	0.5
								2014-09-27 21:00:00	0.425567	0.5
								2014-09-27 22:00:00	0.41873	0.5
								2014-09-27 23:00:00	0.418016	0.5
								2014-09-28	0.417657	0.5
								2014-09-28 01:00:00	0.417118	0.5
								2014-09-28 02:00:00	0.416758	0.5
								2014-09-28 03:00:00	0.416397	0.5
								2014-09-28 04:00:00	0.416036	0.5
								2014-09-28 05:00:00	0.415674	0.5
								2014-09-28 06:00:00	0.415493	0.5
								2014-09-28 07:00:00	0.414948	0.5
								2014-09-28 08:00:00	0.414584	0.5
								2014-09-28 09:00:00	0.414219	0.5
								2014-09-28 10:00:00	0.412937	0.5
								2014-09-28 11:00:00	0.412386	0.5
								2014-09-28 12:00:00	0.412201	0.5
								2014-09-28 13:00:00	0.411832	0.5
								2014-09-28 14:00:00	0.411463	0.5
								2014-09-28 15:00:00	0.411092	0.5
								2014-09-28 16:00:00	0.410721	0.5
								2014-09-28 17:00:00	0.410349	0.5
								2014-09-28 18:00:00	0.410163	0.5
								2014-09-28 19:00:00	0.40979	0.5
								2014-09-28 20:00:00	0.409417	0.5
								2014-09-28 21:00:00	0.40923	0.5
								2014-09-28 22:00:00	0.408855	0.5
								2014-09-28 23:00:00	0.408668	0.5
								2014-09-29	0.408292	0.5
								2014-09-29 01:00:00	0.407916	0.5
								2014-09-29 02:00:00	0.407539	0.5
								2014-09-29 03:00:00	0.407161	0.5
								2014-09-29 04:00:00	0.406783	0.5
								2014-09-29 05:00:00	0.406404	0.5
								2014-09-29 06:00:00	0.406024	0.5
								2014-09-29 07:00:00	0.405644	0.5
								2014-09-29 08:00:00	0.405262	0.5
								2014-09-29 09:00:00	0.404881	0.5
								2014-09-29 10:00:00	0.404306	0.5
								2014-09-29 11:00:00	0.403923	0.5
								2014-09-29 12:00:00	0.403731	0.5
								2014-09-29 13:00:00	0.403346	0.5
								2014-09-29 14:00:00	0.40296	0.5
								2014-09-29 15:00:00	0.402574	0.5
								2014-09-29 16:00:00	0.402381	0.5
								2014-09-29 17:00:00	0.402187	0.5
								2014-09-29 18:00:00	0.4018	0.5
								2014-09-29 19:00:00	0.401411	0.5
								2014-09-29 20:00:00	0.401217	0.5
								2014-09-29 21:00:00	0.400828	0.5
								2014-09-29 22:00:00	0.400438	0.5
								2014-09-29 23:00:00	0.400047	0.5
								2014-09-30	0.399655	0.5
								2014-09-30 01:00:00	0.399263	0.5
								2014-09-30 02:00:00	0.39887	0.5
								2014-09-30 03:00:00	0.398476	0.5
								2014-09-30 04:00:00	0.398279	0.5
								2014-09-30 05:00:00	0.397884	0.5
								2014-09-30 06:00:00	0.397488	0.5
								2014-09-30 07:00:00	0.396893	0.5
								2014-09-30 08:00:00	0.396695	0.5
								2014-09-30 09:00:00	0.396297	0.5
								2014-09-30 10:00:00	0.395699	0.5
								2014-09-30 11:00:00	0.395299	0.5
								2014-09-30 12:00:00	0.394898	0.5
								2014-09-30 13:00:00	0.394296	0.5
								2014-09-30 14:00:00	0.393692	0.5
								2014-09-30 15:00:00	0.393289	0.5
								2014-09-30 16:00:00	0.392682	0.5
								2014-09-30 17:00:00	0.392277	0.5
								2014-09-30 18:00:00	0.391871	0.5
								2014-09-30 19:00:00	0.39126	0.5
								2014-09-30 20:00:00	0.390852	0.5
								2014-09-30 21:00:00	0.390443	0.5
								2014-09-30 22:00:00	0.389829	0.5
								2014-09-30 23:00:00	0.389418	0.5
								2014-10-01	0.3888	0.5
								2014-10-01 01:00:00	0.388387	0.5
								2014-10-01 02:00:00	0.387767	0.5
								2014-10-01 03:00:00	0.387145	0.5
								2014-10-01 04:00:00	0.386521	0.5
								2014-10-01 05:00:00	0.385895	0.5
								2014-10-01 06:00:00	0.385267	0.5
								2014-10-01 07:00:00	0.384638	0.5
								2014-10-01 08:00:00	0.383796	0.5
								2014-10-01 09:00:00	0.382951	0.5
								2014-10-01 10:00:00	0.382315	0.5
								2014-10-01 11:00:00	0.381465	0.5
								2014-10-01 12:00:00	0.380824	0.5
								2014-10-01 13:00:00	0.379968	0.5
								2014-10-01 14:00:00	0.379324	0.5
								2014-10-01 15:00:00	0.378678	0.5
								2014-10-01 16:00:00	0.37803	0.5
								2014-10-01 17:00:00	0.37738	0.5
								2014-10-01 18:00:00	0.376728	0.5
								2014-10-01 19:00:00	0.376074	0.5
								2014-10-01 20:00:00	0.3752	0.5
								2014-10-01 21:00:00	0.374542	0.5
								2014-10-01 22:00:00	0.373662	0.5
								2014-10-01 23:00:00	0.373	0.5
								2014-10-02	0.371892	0.5
								2014-10-02 01:00:00	0.371002	0.5
								2014-10-02 02:00:00	0.370108	0.5
								2014-10-02 03:00:00	0.368761	0.5
								2014-10-02 04:00:00	0.367633	0.5
								2014-10-02 05:00:00	0.3665	0.5
								2014-10-02 06:00:00	0.365589	0.5
								2014-10-02 07:00:00	0.364904	0.5
								2014-10-02 08:00:00	0.363987	0.5
								2014-10-02 09:00:00	0.363298	0.5
								2014-10-02 10:00:00	0.362375	0.5
								2014-10-02 11:00:00	0.361216	0.5
								2014-10-02 12:00:00	0.360286	0.5
								2014-10-02 13:00:00	0.359351	0.5
								2014-10-02 14:00:00	0.358414	0.5
								2014-10-02 15:00:00	0.357472	0.5
								2014-10-02 16:00:00	0.356764	0.5
								2014-10-02 17:00:00	0.355816	0.5
								2014-10-02 18:00:00	0.354865	0.5
								2014-10-02 19:00:00	0.35391	0.5
								2014-10-02 20:00:00	0.352952	0.5
								2014-10-02 21:00:00	0.351749	0.5
								2014-10-02 22:00:00	0.350782	0.5
								2014-10-02 23:00:00	0.349812	0.5
								2014-10-03	0.348594	0.5
								2014-10-03 01:00:00	0.347615	0.5
								2014-10-03 02:00:00	0.345894	0.5
								2014-10-03 03:00:00	0.344409	0.5
								2014-10-03 04:00:00	0.342916	0.5
								2014-10-03 05:00:00	0.341164	0.5
								2014-10-03 06:00:00	0.339399	0.5
								2014-10-03 07:00:00	0.337624	0.5
								2014-10-03 08:00:00	0.335323	0.5
								2014-10-03 09:00:00	0.333003	0.5
								2014-10-03 10:00:00	0.330924	0.5
								2014-10-03 11:00:00	0.328303	0.5
								2014-10-03 12:00:00	0.325657	0.5
								2014-10-03 13:00:00	0.322987	0.5
								2014-10-03 14:00:00	0.320291	0.5
								2014-10-03 15:00:00	0.31757	0.5
								2014-10-03 16:00:00	0.315099	0.5
								2014-10-03 17:00:00	0.312608	0.5
								2014-10-03 18:00:00	0.310655	0.5
								2014-10-03 19:00:00	0.308408	0.5
								2014-10-03 20:00:00	0.306428	0.5
								2014-10-03 21:00:00	0.304436	0.5
								2014-10-03 22:00:00	0.302717	0.5
								2014-10-03 23:00:00	0.300989	0.5
								2014-10-04	0.299251	0.5
								2014-10-04 01:00:00	0.297504	0.5
								2014-10-04 02:00:00	0.295453	0.5
								2014-10-04 03:00:00	0.293092	0.5
								2014-10-04 04:00:00	0.290715	0.5
								2014-10-04 05:00:00	0.28862	0.5
								2014-10-04 06:00:00	0.286813	0.5
								2014-10-04 07:00:00	0.284997	0.5
								2014-10-04 08:00:00	0.282865	0.5
								2014-10-04 09:00:00	0.280719	0.5
								2014-10-04 10:00:00	0.278869	0.5
								2014-10-04 11:00:00	0.276386	0.5
								2014-10-04 12:00:00	0.273571	0.5
								2014-10-04 13:00:00	0.271366	0.4
								2014-10-04 14:00:00	0.269464	0.5
								2014-10-04 15:00:00	0.267233	0.5
								2014-10-04 16:00:00	0.264987	0.5
								2014-10-04 17:00:00	0.262726	0.4
								2014-10-04 18:00:00	0.260778	0.5
								2014-10-04 19:00:00	0.259145	0.5
								2014-10-04 20:00:00	0.257177	0.4
								2014-10-04 21:00:00	0.254867	0.5
								2014-10-04 22:00:00	0.253208	0.4
								2014-10-04 23:00:00	0.251542	0.4
								2014-10-05	0.249533	0.4
								2014-10-05 01:00:00	0.24785	0.4
								2014-10-05 02:00:00	0.24582	0.4
								2014-10-05 03:00:00	0.244121	0.4
								2014-10-05 04:00:00	0.242071	0.4
								2014-10-05 05:00:00	0.240354	0.4
								2014-10-05 06:00:00	0.23863	0.4
								2014-10-05 07:00:00	0.236899	0.4
								2014-10-05 08:00:00	0.23481	0.4
								2014-10-05 09:00:00	0.232359	0.4
								2014-10-05 10:00:00	0.230247	0.4
								2014-10-05 11:00:00	0.228123	0.4
								2014-10-05 12:00:00	0.225987	0.4
								2014-10-05 13:00:00	0.224199	0.4
								2014-10-05 14:00:00	0.222763	0.4
								2014-10-05 15:00:00	0.220961	0.4
								2014-10-05 16:00:00	0.219513	0.4
								2014-10-05 17:00:00	0.21806	0.4
								2014-10-05 18:00:00	0.216967	0.4
								2014-10-05 19:00:00	0.215505	0.4
								2014-10-05 20:00:00	0.214773	0.4
								2014-10-05 21:00:00	0.213671	0.4
								2014-10-05 22:00:00	0.212566	0.4
								2014-10-05 23:00:00	0.211459	0.4
								2014-10-06	0.210349	0.4
								2014-10-06 01:00:00	0.209235	0.4
								2014-10-06 02:00:00	0.208119	0.4
								2014-10-06 03:00:00	0.207	0.4
								2014-10-06 04:00:00	0.205878	0.4
								2014-10-06 05:00:00	0.204377	0.4
								2014-10-06 06:00:00	0.202871	0.4
								2014-10-06 07:00:00	0.200981	0.4
								2014-10-06 08:00:00	0.199083	0.4
								2014-10-06 09:00:00	0.197177	0.4
								2014-10-06 10:00:00	0.194878	0.4
								2014-10-06 11:00:00	0.192567	0.4
								2014-10-06 12:00:00	0.189857	0.3
								2014-10-06 13:00:00	0.187129	0.3
								2014-10-06 14:00:00	0.184385	0.3
								2014-10-06 15:00:00	0.181229	0.3
								2014-10-06 16:00:00	0.178449	0.3
								2014-10-06 17:00:00	0.175252	0.3
								2014-10-06 18:00:00	0.172436	0.3
								2014-10-06 19:00:00	0.17001	0.3
								2014-10-06 20:00:00	0.167978	0.3
								2014-10-06 21:00:00	0.165937	0.3
								2014-10-06 22:00:00	0.163888	0.3
								2014-10-06 23:00:00	0.16183	0.3
								2014-10-07	0.160177	0.3
								2014-10-07 01:00:00	0.158519	0.3
								2014-10-07 02:00:00	0.156855	0.3
								2014-10-07 03:00:00	0.155185	0.3
								2014-10-07 04:00:00	0.153929	0.3
								2014-10-07 05:00:00	0.15225	0.3
								2014-10-07 06:00:00	0.150986	0.3
								2014-10-07 07:00:00	0.14972	0.3
								2014-10-07 08:00:00	0.14845	0.3
								2014-10-07 09:00:00	0.147177	0.3
								2014-10-07 10:00:00	0.145901	0.2
								2014-10-07 11:00:00	0.144621	0.2
								2014-10-07 12:00:00	0.143766	0.2
								2014-10-07 13:00:00	0.14291	0.2
								2014-10-07 14:00:00	0.142053	0.2
								2014-10-07 15:00:00	0.141623	0.2
								2014-10-07 16:00:00	0.141194	0.2
								2014-10-07 17:00:00	0.140764	0.3
								2014-10-07 18:00:00	0.140333	0.3
								2014-10-07 19:00:00	0.139902	0.3
								2014-10-07 20:00:00	0.139471	0.2
								2014-10-07 21:00:00	0.138608	0.2
								2014-10-07 22:00:00	0.138175	0.2
								2014-10-07 23:00:00	0.137743	0.2
								2014-10-08	0.136877	0.2
								2014-10-08 01:00:00	0.136443	0.2
								2014-10-08 02:00:00	0.135574	0.2
								2014-10-08 03:00:00	0.13514	0.2
								2014-10-08 04:00:00	0.134269	0.2
								2014-10-08 05:00:00	0.133833	0.2
								2014-10-08 06:00:00	0.133397	0.2
								2014-10-08 07:00:00	0.13296	0.2
								2014-10-08 08:00:00	0.132086	0.2
								2014-10-08 09:00:00	0.131648	0.2
								2014-10-08 10:00:00	0.13121	0.2
								2014-10-08 11:00:00	0.130772	0.2
								2014-10-08 12:00:00	0.130333	0.2
								2014-10-08 13:00:00	0.129894	0.2
								2014-10-08 14:00:00	0.129894	0.2
								2014-10-08 15:00:00	0.129894	0.2
								2014-10-08 16:00:00	0.129454	0.2
								2014-10-08 17:00:00	0.129454	0.2
								2014-10-08 18:00:00	0.129454	0.2
								2014-10-08 19:00:00	0.129454	0.2
								2014-10-08 20:00:00	0.129014	0.2
								2014-10-08 21:00:00	0.129014	0.2
								2014-10-08 22:00:00	0.128134	0.2
								2014-10-08 23:00:00	0.128134	0.2
								2014-10-09	0.127693	0.2
								2014-10-09 01:00:00	0.126809	0.1
								2014-10-09 02:00:00	0.126809	0.1
								2014-10-09 03:00:00	0.126367	0.1
								2014-10-09 04:00:00	0.125925	0.1
								2014-10-09 05:00:00	0.125482	0.1
								2014-10-09 06:00:00	0.125039	0.1
								2014-10-09 07:00:00	0.124595	0.1
								2014-10-09 08:00:00	0.124151	0.1
								2014-10-09 09:00:00	0.123707	0.1
								2014-10-09 10:00:00	0.123707	0.1
								2014-10-09 11:00:00	0.123262	0.1
								2014-10-09 12:00:00	0.122817	0.1
								2014-10-09 13:00:00	0.122817	0.1
								2014-10-09 14:00:00	0.122817	0.1
								2014-10-09 15:00:00	0.122372	0.1
								2014-10-09 16:00:00	0.122372	0.1
								2014-10-09 17:00:00	0.122372	0.1
								2014-10-09 18:00:00	0.122372	0.1
								2014-10-09 19:00:00	0.122372	0.1
								2014-10-09 20:00:00	0.122372	0.1
								2014-10-09 21:00:00	0.122372	0.1
								2014-10-09 22:00:00	0.122372	0.1
								2014-10-09 23:00:00	0.121926	0.1
								2014-10-10	0.121926	0.1
								2014-10-10 01:00:00	0.121926	0.1
								2014-10-10 02:00:00	0.121926	0.1
								2014-10-10 03:00:00	0.121926	0.2
								2014-10-10 04:00:00	0.121926	0.2
								2014-10-10 05:00:00	0.121926	0.2
								2014-10-10 06:00:00	0.121926	0.2
								2014-10-10 07:00:00	0.121926	0.2
								2014-10-10 08:00:00	0.121926	0.2
								2014-10-10 09:00:00	0.121926	0.2
								2014-10-10 10:00:00	0.121926	0.2
								2014-10-10 11:00:00	0.12148	0.2
								2014-10-10 12:00:00	0.12148	0.1
								2014-10-10 13:00:00	0.121034	0.1
								2014-10-10 14:00:00	0.121034	0.1
								2014-10-10 15:00:00	0.120587	0.1
								2014-10-10 16:00:00	0.120587	0.1
								2014-10-10 17:00:00	0.120587	0.1
								2014-10-10 18:00:00	0.120139	0.1
								2014-10-10 19:00:00	0.120139	0.1
								2014-10-10 20:00:00	0.120139	0.1
								2014-10-10 21:00:00	0.120139	0.1
								2014-10-10 22:00:00	0.120139	0.1
								2014-10-10 23:00:00	0.120139	0.1
								2014-10-11	0.119692	0.1
								2014-10-11 01:00:00	0.119692	0.1
								2014-10-11 02:00:00	0.120139	0.1
								2014-10-11 03:00:00	0.120139	0.1
								2014-10-11 04:00:00	0.119692	0.1
								2014-10-11 05:00:00	0.120139	0.1
								2014-10-11 06:00:00	0.119692	0.1
								2014-10-11 07:00:00	0.120139	0.1
								2014-10-11 08:00:00	0.119692	0.2
								2014-10-11 09:00:00	0.120139	0.2
								2014-10-11 10:00:00	0.120139	0.2
								2014-10-11 11:00:00	0.120139	0.2
								2014-10-11 12:00:00	0.120139	0.2
								2014-10-11 13:00:00	0.120139	0.2
								2014-10-11 14:00:00	0.120139	0.2
								2014-10-11 15:00:00	0.120587	0.2
								2014-10-11 16:00:00	0.120587	0.2
								2014-10-11 17:00:00	0.120587	0.2
								2014-10-11 18:00:00	0.121034	0.2
								2014-10-11 19:00:00	0.121034	0.2
								2014-10-11 20:00:00	0.121034	0.2
								2014-10-11 21:00:00	0.121034	0.2
								2014-10-11 22:00:00	0.121034	0.2
								2014-10-11 23:00:00	0.121034	0.2
								2014-10-12	0.121034	0.2
								2014-10-12 01:00:00	0.121034	0.2
								2014-10-12 02:00:00	0.121034	0.2
								2014-10-12 03:00:00	0.121034	0.2
								2014-10-12 04:00:00	0.120587	0.2
								2014-10-12 05:00:00	0.120587	0.2
								2014-10-12 06:00:00	0.120587	0.2
								2014-10-12 07:00:00	0.120587	0.2
								2014-10-12 08:00:00	0.120587	0.2
								2014-10-12 09:00:00	0.120587	0.2
								2014-10-12 10:00:00	0.120587	0.2
								2014-10-12 11:00:00	0.120587	0.2
								2014-10-12 12:00:00	0.120587	0.2
								2014-10-12 13:00:00	0.120587	0.2
								2014-10-12 14:00:00	0.120587	0.2
								2014-10-12 15:00:00	0.121034	0.2
								2014-10-12 16:00:00	0.121034	0.2
								2014-10-12 17:00:00	0.121034	0.2
								2014-10-12 18:00:00	0.121034	0.2
								2014-10-12 19:00:00	0.121034	0.2
								2014-10-12 20:00:00	0.12148	0.3
								2014-10-12 21:00:00	0.12148	0.3
								2014-10-12 22:00:00	0.12148	0.3
								2014-10-12 23:00:00	0.12148	0.2
								2014-10-13	0.12148	0.2
								2014-10-13 01:00:00	0.121034	0.2
								2014-10-13 02:00:00	0.121034	0.2
								2014-10-13 03:00:00	0.121034	0.2
								2014-10-13 04:00:00	0.120587	0.2
								2014-10-13 05:00:00	0.120587	0.2
								2014-10-13 06:00:00	0.120139	0.2
								2014-10-13 07:00:00	0.120139	0.2
								2014-10-13 08:00:00	0.119692	0.2
								2014-10-13 09:00:00	0.119244	0.1
								2014-10-13 10:00:00	0.119244	0.1
								2014-10-13 11:00:00	0.119244	0.1
								2014-10-13 12:00:00	0.119244	0.1
								2014-10-13 13:00:00	0.119244	0.2
								2014-10-13 14:00:00	0.118795	0.2
								2014-10-13 15:00:00	0.119244	0.2
								2014-10-13 16:00:00	0.118795	0.2
								2014-10-13 17:00:00	0.119244	0.2
								2014-10-13 18:00:00	0.118795	0.2
								2014-10-13 19:00:00	0.118795	0.1
								2014-10-13 20:00:00	0.118795	0.1
								2014-10-13 21:00:00	0.118347	0.1
								2014-10-13 22:00:00	0.117898	0.1
								2014-10-13 23:00:00	0.117898	0.1
								2014-10-14	0.117448	0.1
								2014-10-14 01:00:00	0.117448	0.1
								2014-10-14 02:00:00	0.116998	0.1
								2014-10-14 03:00:00	0.116548	0.1
								2014-10-14 04:00:00	0.116548	0
								2014-10-14 05:00:00	0.116097	0
								2014-10-14 06:00:00	0.116097	0
								2014-10-14 07:00:00	0.115646	0
								2014-10-14 08:00:00	0.115646	0
								2014-10-14 09:00:00	0.115646	0
								2014-10-14 10:00:00	0.115195	0
								2014-10-14 11:00:00	0.115195	0
								2014-10-14 12:00:00	0.115195	0
								2014-10-14 13:00:00	0.115195	0
								2014-10-14 14:00:00	0.115195	0
								2014-10-14 15:00:00	0.115195	0
								2014-10-14 16:00:00	0.115195	0
								2014-10-14 17:00:00	0.115195	0.1
								2014-10-14 18:00:00	0.115195	0.1
								2014-10-14 19:00:00	0.115195	0.1
								2014-10-14 20:00:00	0.115195	0.1
								2014-10-14 21:00:00	0.115195	0.1
								2014-10-14 22:00:00	0.115195	0.1
								2014-10-14 23:00:00	0.115195	0.1
								2014-10-15	0.115195	0.1
								2014-10-15 01:00:00	0.115195	0.1
								2014-10-15 02:00:00	0.115195	0.1
								2014-10-15 03:00:00	0.115195	0.1
								2014-10-15 04:00:00	0.115195	0.1
								2014-10-15 05:00:00	0.115195	0.1
								2014-10-15 06:00:00	0.115195	0.1
								2014-10-15 07:00:00	0.115195	0.1
								2014-10-15 08:00:00	0.115195	0.1
								2014-10-15 09:00:00	0.115195	0.1
								2014-10-15 10:00:00	0.115195	0.1
								2014-10-15 11:00:00	0.115195	0.1
								2014-10-15 12:00:00	0.115195	0.1
								2014-10-15 13:00:00	0.115195	0.1
								2014-10-15 14:00:00	0.115646	0.1
								2014-10-15 15:00:00	0.115646	0.1
								2014-10-15 16:00:00	0.115646	0.1
								2014-10-15 17:00:00	0.115646	0.1
								2014-10-15 18:00:00	0.116097	0.2
								2014-10-15 19:00:00	0.116097	0.2
								2014-10-15 20:00:00	0.116097	0.2
								2014-10-15 21:00:00	0.116097	0.2
								2014-10-15 22:00:00	0.116097	0.1
								2014-10-15 23:00:00	0.115646	0.1
								2014-10-16	0.115646	0.1
								2014-10-16 01:00:00	0.115646	0.1
								2014-10-16 02:00:00	0.115195	0.1
								2014-10-16 03:00:00	0.115195	0.1
								2014-10-16 04:00:00	0.114743	0
								2014-10-16 05:00:00	0.114743	0
								2014-10-16 06:00:00	0.114291	0
								2014-10-16 07:00:00	0.113839	0
								2014-10-16 08:00:00	0.113839	0
								2014-10-16 09:00:00	0.113386	0
								2014-10-16 10:00:00	0.113386	0
								2014-10-16 11:00:00	0.112933	-0.1
								2014-10-16 12:00:00	0.112933	-0.1
								2014-10-16 13:00:00	0.112479	-0.1
								2014-10-16 14:00:00	0.112479	-0.1
								2014-10-16 15:00:00	0.112025	-0.1
								2014-10-16 16:00:00	0.112025	-0.1
								2014-10-16 17:00:00	0.111571	-0.1
								2014-10-16 18:00:00	0.111571	-0.1
								2014-10-16 19:00:00	0.111116	-0.1
								2014-10-16 20:00:00	0.111116	-0.1
								2014-10-16 21:00:00	0.111116	-0.1
								2014-10-16 22:00:00	0.110661	-0.2
								2014-10-16 23:00:00	0.110206	-0.2
								2014-10-17	0.110206	-0.2
								2014-10-17 01:00:00	0.10975	-0.2
								2014-10-17 02:00:00	0.10975	-0.2
								2014-10-17 03:00:00	0.109294	-0.2
								2014-10-17 04:00:00	0.109294	-0.2
								2014-10-17 05:00:00	0.108837	-0.2
								2014-10-17 06:00:00	0.108837	-0.2
								2014-10-17 07:00:00	0.108837	-0.2
								2014-10-17 08:00:00	0.108837	-0.2
								2014-10-17 09:00:00	0.10838	-0.2
								2014-10-17 10:00:00	0.10838	-0.2
								2014-10-17 11:00:00	0.10838	-0.2
								2014-10-17 12:00:00	0.10838	-0.2
								2014-10-17 13:00:00	0.10838	-0.2
								2014-10-17 14:00:00	0.10838	-0.2
								2014-10-17 15:00:00	0.10838	-0.3
								2014-10-17 16:00:00	0.107923	-0.3
								2014-10-17 17:00:00	0.107923	-0.3
								2014-10-17 18:00:00	0.107465	-0.3
								2014-10-17 19:00:00	0.107465	-0.3
								2014-10-17 20:00:00	0.107007	-0.3
								2014-10-17 21:00:00	0.106549	-0.4
								2014-10-17 22:00:00	0.106549	-0.4
								2014-10-17 23:00:00	0.10609	-0.4
								2014-10-18	0.105631	-0.4
								2014-10-18 01:00:00	0.105631	-0.5
								2014-10-18 02:00:00	0.105171	-0.5
								2014-10-18 03:00:00	0.104711	-0.5
								2014-10-18 04:00:00	0.104711	-0.5
								2014-10-18 05:00:00	0.104711	-0.5
								2014-10-18 06:00:00	0.104251	-0.5
								2014-10-18 07:00:00	0.104251	-0.5
								2014-10-18 08:00:00	0.104251	-0.5
								2014-10-18 09:00:00	0.104251	-0.5
								2014-10-18 10:00:00	0.10379	-0.5
								2014-10-18 11:00:00	0.10379	-0.5
								2014-10-18 12:00:00	0.10379	-0.5
								2014-10-18 13:00:00	0.10379	-0.6
								2014-10-18 14:00:00	0.103329	-0.6
								2014-10-18 15:00:00	0.103329	-0.6
								2014-10-18 16:00:00	0.103329	-0.6
								2014-10-18 17:00:00	0.103329	-0.6
								2014-10-18 18:00:00	0.103329	-0.6
								2014-10-18 19:00:00	0.103329	-0.6
								2014-10-18 20:00:00	0.103329	-0.6
								2014-10-18 21:00:00	0.103329	-0.6
								2014-10-18 22:00:00	0.103329	-0.6
								2014-10-18 23:00:00	0.103329	-0.5
								2014-10-19	0.103329	-0.5
								2014-10-19 01:00:00	0.103329	-0.5
								2014-10-19 02:00:00	0.103329	-0.5
								2014-10-19 03:00:00	0.103329	-0.5
								2014-10-19 04:00:00	0.103329	-0.5
[truncated: 6,366 more rows]

## Sheet: Atmospheric2014-2015
	2014-2015 season
date	Air temp. (°C)	Wind speed (m/s)	Snow depth, m
2014-07-26 10:00:00	12.5287	1.15749	0.004
2014-07-26 11:00:00	14.2833	0.569097	-0.051
2014-07-26 12:00:00	15.2322	0.993055	-0.052
2014-07-26 13:00:00	16.9524	0.849306	-0.057
2014-07-26 14:00:00	15.4825	1.33542	-0.058
2014-07-26 15:00:00	12.8497	0.918403	-0.039
2014-07-26 16:00:00	13.1311	0.195486	-0.037
2014-07-26 17:00:00	11.7418	0.575694	-0.044
2014-07-26 18:00:00	11.6062	1.02014	-0.041
2014-07-26 19:00:00	9.33582	1.10312	-0.061
2014-07-26 20:00:00	6.47448	2.1941	-0.058
2014-07-26 21:00:00	6.06861	2.63646	-0.052
2014-07-26 22:00:00	6.18724	1.7809	-0.049
2014-07-26 23:00:00	6.22244	2.48333	-0.047
2014-07-27	4.79823	1.85694	-0.054
2014-07-27 01:00:00	5.67988	2.03889	-0.05
2014-07-27 02:00:00	5.4086	2.13611	-0.048
2014-07-27 03:00:00	5.64597	2.02639	-0.05
2014-07-27 04:00:00	5.78161	1.74306	-0.043
2014-07-27 05:00:00	7.95184	2.17604	-0.046
2014-07-27 06:00:00	9.20407	1.53507	-0.046
2014-07-27 07:00:00	9.01739	1.28819	-0.05
2014-07-27 08:00:00	9.35708	1.65799	-0.064
2014-07-27 09:00:00	8.30512	2.53819	-0.046
2014-07-27 10:00:00	8.31168	2.76979	-0.051
2014-07-27 11:00:00	8.55465	2.42604	-0.054
2014-07-27 12:00:00	9.16136	2.86389	-0.058
2014-07-27 13:00:00	10.6443	2.44062	-0.065
2014-07-27 14:00:00	11.7288	3.13646	-0.07
2014-07-27 15:00:00	9.98924	2.93299	-0.062
2014-07-27 16:00:00	10.3871	2.4691	-0.077
2014-07-27 17:00:00	7.87871	2.20174	-0.076
2014-07-27 18:00:00	6.57621	2.23889	-0.066
2014-07-27 19:00:00	7.62835	2.43993	-0.06
2014-07-27 20:00:00	5.72963	2.11771	-0.07
2014-07-27 21:00:00	5.33954	1.38299	-0.065
2014-07-27 22:00:00	5.64597	1.69965	-0.056
2014-07-27 23:00:00	4.56086	1.00451	-0.051
2014-07-28	5.68064	1.31354	-0.047
2014-07-28 01:00:00	3.95872	0.980903	-0.06
2014-07-28 02:00:00	4.13837	0.729861	-0.056
2014-07-28 03:00:00	4.91858	1.37639	-0.05
2014-07-28 04:00:00	5.46132	2.2125	-0.047
2014-07-28 05:00:00	5.29171	1.40833	-0.051
2014-07-28 06:00:00	4.98642	0.657639	-0.051
2014-07-28 07:00:00	9.65509	0.823958	-0.046
2014-07-28 08:00:00	6.79893	1.92569	-0.057
2014-07-28 09:00:00	6.56156	2.4868	-0.051
2014-07-28 10:00:00	7.85013	1.93021	-0.053
2014-07-28 11:00:00	8.85737	2.82847	-0.047
2014-07-28 12:00:00	9.52708	2.71458	-0.06
2014-07-28 13:00:00	10.1359	2.52813	-0.055
2014-07-28 14:00:00	8.03392	2.37708	-0.053
2014-07-28 15:00:00	9.69581	1.56875	-0.054
2014-07-28 16:00:00	9.15257	2.60938	-0.049
2014-07-28 17:00:00	10.2932	2.39826	-0.055
2014-07-28 18:00:00	9.38883	2.23333	-0.051
2014-07-28 19:00:00	8.64407	1.70347	-0.042
2014-07-28 20:00:00	7.02093	1.37986	-0.044
2014-07-28 21:00:00	6.79888	1.53924	-0.041
2014-07-28 22:00:00	6.56154	1.39826	-0.038
2014-07-28 23:00:00	5.67988	1.02153	-0.046
2014-07-29	5.67988	0.868055	-0.033
2014-07-29 01:00:00	6.52765	1.08507	-0.034
2014-07-29 02:00:00	6.12073	1.22257	-0.039
2014-07-29 03:00:00	6.42592	1.13403	-0.04
2014-07-29 04:00:00	7.03631	0.615972	-0.034
2014-07-29 05:00:00	7.10412	0.611806	-0.04
2014-07-29 06:00:00	6.6972	1.15069	-0.044
2014-07-29 07:00:00	7.3754	1.16354	-0.047
2014-07-29 08:00:00	8.83352	1.91806	-0.049
2014-07-29 09:00:00	8.39269	2.04132	-0.055
2014-07-29 10:00:00	7.71449	3.66875	-0.058
2014-07-29 11:00:00	8.90134	2.09514	-0.059
2014-07-29 12:00:00	10.1738	1.51805	-0.062
2014-07-29 13:00:00	11.2543	0.778125	-0.063
2014-07-29 14:00:00	11.6949	1.13403	-0.063
2014-07-29 15:00:00	12.4068	0.543403	-0.057
2014-07-29 16:00:00	11.3558	1.01979	-0.063
2014-07-29 17:00:00	11.2542	0.792361	-0.052
2014-07-29 18:00:00	10.4407	1.65035	-0.056
2014-07-29 19:00:00	10.9491	1.17465	-0.053
2014-07-29 20:00:00	9.45763	1.20555	-0.055
2014-07-29 21:00:00	8.84847	0.520139	-0.058
2014-07-29 22:00:00	7.39947	0.887153	-0.038
2014-07-29 23:00:00	6.93454	1.40903	-0.044
2014-07-30	6.765	0.519444	-0.045
2014-07-30 01:00:00	6.83281	0.64375	-0.037
2014-07-30 02:00:00	6.96845	0.914236	-0.029
2014-07-30 03:00:00	6.35808	1.42674	-0.051
2014-07-30 04:00:00	6.59545	0.98368	-0.05
2014-07-30 05:00:00	5.64668	1.21424	-0.05
2014-07-30 06:00:00	6.60348	1.83854	-0.042
2014-07-30 07:00:00	6.52784	2.00312	-0.037
2014-07-30 08:00:00	5.71382	1.93993	-0.042
2014-07-30 09:00:00	6.46661	1.45833	-0.042
2014-07-30 10:00:00	6.66392	0.60868	-0.042
2014-07-30 11:00:00	8.05359	0.954861	-0.035
2014-07-30 12:00:00	10.862	0.751389	-0.041
2014-07-30 13:00:00	10.7119	1.99132	-0.048
2014-07-30 14:00:00	10.2373	2.25069	-0.042
2014-07-30 15:00:00	11.6558	2.61875	-0.056
2014-07-30 16:00:00	14.0296	1.225	-0.058
2014-07-30 17:00:00	10.6526	3.17083	-0.059
2014-07-30 18:00:00	7.91257	3.53715	-0.059
2014-07-30 19:00:00	7.37038	3.20451	-0.061
2014-07-30 20:00:00	8.83758	2.47847	-0.059
2014-07-30 21:00:00	6.40633	2.04201	-0.064
2014-07-30 22:00:00	5.83828	1.71979	-0.049
2014-07-30 23:00:00	4.45913	0.990972	-0.054
2014-07-31	4.22176	1.23785	-0.051
2014-07-31 01:00:00	4.56208	0.840278	-0.049
2014-07-31 02:00:00	4.77926	0.900694	-0.045
2014-07-31 03:00:00	5.56268	0.455556	-0.042
2014-07-31 04:00:00	5.62611	0.299306	-0.042
2014-07-31 05:00:00	6.3658	0.966667	-0.042
2014-07-31 06:00:00	6.69957	0.342014	-0.04
2014-07-31 07:00:00	6.46013	1.33958	-0.033
2014-07-31 08:00:00	6.93556	1.32222	-0.031
2014-07-31 09:00:00	7.54498	1.7875	-0.028
2014-07-31 10:00:00	7.44321	1.72882	-0.031
2014-07-31 11:00:00	6.52765	0.590972	-0.034
2014-07-31 12:00:00	6.19183	0.670833	-0.034
2014-07-31 13:00:00	5.25506	1.0191	-0.033
2014-07-31 14:00:00	7.22523	0.838542	-0.021
2014-07-31 15:00:00	6.84014	1.40347	-0.022
2014-07-31 16:00:00	6.12449	0.923264	-0.032
2014-07-31 17:00:00	6.27445	0.808681	-0.029
2014-07-31 18:00:00	6.20209	1.00382	-0.031
2014-07-31 19:00:00	6.91346	0.332292	-0.027
2014-07-31 20:00:00	7.44426	1.38299	-0.023
2014-07-31 21:00:00	7.34149	0.503472	-0.026
2014-07-31 22:00:00	7.81622	0.595486	-0.026
2014-07-31 23:00:00	7.34149	0.931597	-0.025
2014-08-01	7.44321	0.806597	-0.023
2014-08-01 01:00:00	6.96848	0.827083	-0.025
2014-08-01 02:00:00	6.76597	0.872917	-0.025
2014-08-01 03:00:00	7.04099	0.790625	-0.025
2014-08-01 04:00:00	8.35966	0.931597	-0.026
2014-08-01 05:00:00	7.98578	0.815625	-0.023
2014-08-01 06:00:00	9.40999	0.669792	-0.021
2014-08-01 07:00:00	8.69788	0.982986	-0.025
2014-08-01 08:00:00	10.5629	0.514583	-0.026
2014-08-01 09:00:00	11.0869	0.825347	-0.025
2014-08-01 10:00:00	11.1865	0.595139	-0.029
2014-08-01 11:00:00	12.0339	0.637153	-0.028
2014-08-01 12:00:00	12.4746	0.982986	-0.022
2014-08-01 13:00:00	12.9131	1.57986	-0.025
2014-08-01 14:00:00	13.6402	2.49549	-0.025
2014-08-01 15:00:00	13.3006	1.53681	-0.027
2014-08-01 16:00:00	15.1644	0.539236	-0.028
2014-08-01 17:00:00	14.5883	1.21319	-0.029
2014-08-01 18:00:00	15.3825	0.915625	-0.04
2014-08-01 19:00:00	12.6016	1.21875	-0.042
2014-08-01 20:00:00	11.6739	0.976042	-0.038
2014-08-01 21:00:00	11.6062	1.15069	-0.03
2014-08-01 22:00:00	10.4202	1.03715	-0.035
2014-08-01 23:00:00	8.54062	0.273264	-0.029
2014-08-02	8.61017	0.905555	-0.032
2014-08-02 01:00:00	10.678	1.42292	-0.035
2014-08-02 02:00:00	8.64458	0.714583	-0.03
2014-08-02 03:00:00	9.18707	0.614583	-0.032
2014-08-02 04:00:00	9.45997	0.998264	-0.025
2014-08-02 05:00:00	9.72934	0.705903	-0.027
2014-08-02 06:00:00	11.5932	1.48507	-0.023
2014-08-02 07:00:00	11.5254	1.34583	-0.027
2014-08-02 08:00:00	11.1865	0.846528	-0.027
2014-08-02 09:00:00	16.8939	3.27257	-0.013
2014-08-02 10:00:00	17.9612	3.43819	-0.025
2014-08-02 11:00:00	15.9892	3.95694	-0.025
2014-08-02 12:00:00	13.8947	5.23611	-0.031
2014-08-02 13:00:00	12.0467	5.77986	-0.032
2014-08-02 14:00:00	11.1318	4.74236	-0.029
2014-08-02 15:00:00	5.21837	4.75382	-0.045
2014-08-02 16:00:00	4.89113	4.68368	-0.04
2014-08-02 17:00:00	5.47642	2.7934	-0.032
2014-08-02 18:00:00	5.84943	1.74549	-0.029
2014-08-02 19:00:00	5.3747	2.50417	-0.032
2014-08-02 20:00:00	4.42522	2.56076	-0.034
2014-08-02 21:00:00	3.84875	1.64583	-0.036
2014-08-02 22:00:00	3.57747	1.22049	-0.041
2014-08-02 23:00:00	2.35672	2.42396	-0.04
2014-08-03	2.1009	1.19687	-0.037
2014-08-03 01:00:00	1.45861	1.82569	-0.034
2014-08-03 02:00:00	0.203522	0.712153	-0.036
2014-08-03 03:00:00	2.03671	0.490625	-0.03
2014-08-03 04:00:00	4.40979	0.668056	-0.032
2014-08-03 05:00:00	5.13752	0.834028	-0.034
2014-08-03 06:00:00	7.87885	1.15521	-0.034
2014-08-03 07:00:00	7.62793	0.363194	-0.033
2014-08-03 08:00:00	6.52404	2.29861	-0.03
2014-08-03 09:00:00	6.765	1.78715	-0.031
2014-08-03 10:00:00	6.83281	1.13021	-0.027
2014-08-03 11:00:00	6.765	1.15729	-0.029
2014-08-03 12:00:00	7.30755	1.74063	-0.021
2014-08-03 13:00:00	7.00237	2.13333	-0.021
2014-08-03 14:00:00	10.376	2.02674	-0.027
2014-08-03 15:00:00	8.13562	2.02257	-0.021
2014-08-03 16:00:00	7.2382	0.874653	-0.023
2014-08-03 17:00:00	7.71447	0.434028	-0.021
2014-08-03 18:00:00	6.93454	0.455903	-0.024
2014-08-03 19:00:00	6.59545	2.21806	-0.018
2014-08-03 20:00:00	6.01898	1.22951	-0.019
2014-08-03 21:00:00	6.12345	0.480208	-0.019
2014-08-03 22:00:00	6.02758	0.79375	-0.018
2014-08-03 23:00:00	6.26919	0.998958	-0.015
2014-08-04	5.62851	0.454861	-0.018
2014-08-04 01:00:00	5.29135	0.0940972	-0.019
2014-08-04 02:00:00	4.03663	0.700347	-0.023
2014-08-04 03:00:00	3.56173	1.33403	-0.022
2014-08-04 04:00:00	5.52916	1.20035	-0.017
2014-08-04 05:00:00	10.6349	1.06424	-0.016
2014-08-04 06:00:00	9.39045	0.787847	-0.028
2014-08-04 07:00:00	11.8644	0.478472	-0.023
2014-08-04 08:00:00	11.0509	1.05799	-0.024
2014-08-04 09:00:00	10.8136	0.894097	-0.019
2014-08-04 10:00:00	14.7635	0.941667	-0.03
2014-08-04 11:00:00	11.674	2.375	-0.024
2014-08-04 12:00:00	12.9995	1.72014	-0.023
2014-08-04 13:00:00	12.0129	1.46493	-0.023
2014-08-04 14:00:00	17.8075	0.888542	-0.025
2014-08-04 15:00:00	11.4499	2.02361	-0.033
2014-08-04 16:00:00	10.9961	3.04514	-0.026
2014-08-04 17:00:00	8.01679	2.0059	-0.028
2014-08-04 18:00:00	8.71186	0.797222	-0.026
2014-08-04 19:00:00	9.55932	0.310069	-0.02
2014-08-04 20:00:00	9.15254	0.534375	-0.019
2014-08-04 21:00:00	8.61017	0.775	-0.018
2014-08-04 22:00:00	7.69492	0.28125	-0.017
2014-08-04 23:00:00	6.67997	0.635417	-0.02
2014-08-05	5.47633	0.44375	-0.017
2014-08-05 01:00:00	5.20514	0.195139	-0.015
2014-08-05 02:00:00	5.10342	0.367361	-0.014
2014-08-05 03:00:00	4.96871	0.928125	-0.013
2014-08-05 04:00:00	5.11488	0.375347	-0.01
2014-08-05 05:00:00	4.77944	0.786458	-0.011
2014-08-05 06:00:00	4.40976	2.28542	-0.011
2014-08-05 07:00:00	4.9525	0.933333	-0.008
2014-08-05 08:00:00	5.9023	0.579861	-0.005
2014-08-05 09:00:00	5.02034	1.36597	-0.007
2014-08-05 10:00:00	4.74897	1.76771	-0.005
2014-08-05 11:00:00	5.46132	1.28958	-0.002
2014-08-05 12:00:00	9.31684	1.01146	-0.003
2014-08-05 13:00:00	10.1791	1.07396	-0.009
2014-08-05 14:00:00	10.427	1.81875	-0.018
2014-08-05 15:00:00	7.52527	3.11667	-0.014
2014-08-05 16:00:00	7.35883	1.36632	-0.009
2014-08-05 17:00:00	6.08528	1.65486	-0.013
2014-08-05 18:00:00	7.17191	1.55937	-0.003
2014-08-05 19:00:00	5.3747	2.66146	-0.006
2014-08-05 20:00:00	5.44327	1.4	-0.005
2014-08-05 21:00:00	5.23949	1.22014	-0.006
2014-08-05 22:00:00	4.84939	1.03229	-0.004
2014-08-05 23:00:00	5.56308	0.573958	0
2014-08-06	5.39348	0.500695	-0.002
2014-08-06 01:00:00	5.22387	0.625	-0.004
2014-08-06 02:00:00	3.96878	1.15	-0.007
2014-08-06 03:00:00	4.71505	0.703125	0
2014-08-06 04:00:00	4.9525	0.953472	-0.001
2014-08-06 05:00:00	5.49524	1.55069	0
2014-08-06 06:00:00	4.24015	2.33819	-0.005
2014-08-06 07:00:00	4.88466	1.00417	-0.001
2014-08-06 08:00:00	6.68249	0.457986	0.002
2014-08-06 09:00:00	8.56319	1.18333	0.001
2014-08-06 10:00:00	11.5463	1.51979	0.005
2014-08-06 11:00:00	11.4238	3.0493	-0.005
2014-08-06 12:00:00	10.6441	3.38958	-0.002
2014-08-06 13:00:00	12.5072	2.76701	-0.004
2014-08-06 14:00:00	12.1823	3.46076	-0.004
2014-08-06 15:00:00	12.3518	4.15799	-0.008
2014-08-06 16:00:00	10.4202	2.75035	-0.01
2014-08-06 17:00:00	14.2156	1.28958	-0.015
2014-08-06 18:00:00	13.1984	0.591319	-0.017
2014-08-06 19:00:00	8.58622	2.09757	-0.022
2014-08-06 20:00:00	8.22115	1.48229	-0.012
2014-08-06 21:00:00	7.11864	1.03194	-0.011
2014-08-06 22:00:00	5.12798	1.77743	-0.012
2014-08-06 23:00:00	4.32349	2.11597	-0.01
2014-08-07	5.71379	2.56875	-0.003
2014-08-07 01:00:00	5.30687	2.85208	0.001
2014-08-07 02:00:00	5.1783	2.15347	-0.004
2014-08-07 03:00:00	4.67826	1.11667	-0.005
2014-08-07 04:00:00	4.91858	3.21146	-0.002
2014-08-07 05:00:00	4.64721	2.82743	-0.001
2014-08-07 06:00:00	4.308	1.60243	0.001
2014-08-07 07:00:00	4.37584	2.53264	0
2014-08-07 08:00:00	4.88466	1.89062	0
2014-08-07 09:00:00	5.76661	1.71493	0.003
2014-08-07 10:00:00	7.21911	1.08229	0.001
2014-08-07 11:00:00	5.34081	2.35521	-0.004
2014-08-07 12:00:00	5.35443	2.18264	-0.002
2014-08-07 13:00:00	6.20747	1.34132	0.004
2014-08-07 14:00:00	6.97108	1.54306	0.006
2014-08-07 15:00:00	5.47739	3.3309	0.002
2014-08-07 16:00:00	5.6595	4.06771	0.007
2014-08-07 17:00:00	4.64721	3.38854	0.007
2014-08-07 18:00:00	3.93486	2.86458	0.003
2014-08-07 19:00:00	4.07055	3.70208	0.007
2014-08-07 20:00:00	3.69741	2.57153	0.004
2014-08-07 21:00:00	3.62957	2.48611	0.005
2014-08-07 22:00:00	3.42604	2.13819	0.003
2014-08-07 23:00:00	3.25644	1.92257	0.002
2014-08-08	3.5625	2.18368	0.007
2014-08-08 01:00:00	3.35919	3.84549	0.003
2014-08-08 02:00:00	2.92487	3.40208	0.002
2014-08-08 03:00:00	3.13706	2.53021	0.005
2014-08-08 04:00:00	3.34106	2.95555	0.013
2014-08-08 05:00:00	2.66245	2.53958	0.005
2014-08-08 06:00:00	5.94807	2.09479	0.009
2014-08-08 07:00:00	8.05677	1.68125	-0.002
2014-08-08 08:00:00	6.49374	1.19236	-0.005
2014-08-08 09:00:00	9.61345	1.35069	-0.004
2014-08-08 10:00:00	6.85317	1.76181	-0.006
2014-08-08 11:00:00	10.2916	2.22222	-0.001
2014-08-08 12:00:00	9.531	2.5566	-0.006
2014-08-08 13:00:00	10.3391	2.42014	-0.008
2014-08-08 14:00:00	7.66143	3.24931	-0.004
2014-08-08 15:00:00	8.74805	2.99792	-0.011
2014-08-08 16:00:00	5.71215	3.42639	-0.007
2014-08-08 17:00:00	7.4771	2.35903	-0.006
2014-08-08 18:00:00	4.89996	2.09167	-0.003
2014-08-08 19:00:00	3.85946	2.86632	-0.004
2014-08-08 20:00:00	2.64586	4.29271	-0.002
2014-08-08 21:00:00	2.47625	2.91944	0.001
2014-08-08 22:00:00	2.44351	1.89201	0.003
2014-08-08 23:00:00	2.45404	1.41389	0.005
2014-08-09	2.18866	0.895139	0.003
2014-08-09 01:00:00	2.08686	0.802431	0.003
2014-08-09 02:00:00	2.01899	1.15174	0.006
2014-08-09 03:00:00	1.64573	0.980903	0.005
2014-08-09 04:00:00	1.51	1.01424	0.004
2014-08-09 05:00:00	1.88326	0.878472	0.006
2014-08-09 06:00:00	2.62978	1.21146	0.005
2014-08-09 07:00:00	2.73158	1.34132	0.005
2014-08-09 08:00:00	5.41227	0.522222	0.008
2014-08-09 09:00:00	5.56313	1.0125	0.004
2014-08-09 10:00:00	5.52919	1.84618	-0.001
2014-08-09 11:00:00	8.33941	2.13507	-0.002
2014-08-09 12:00:00	6.83284	2.39618	-0.005
2014-08-09 13:00:00	8.92813	2.38368	-0.003
2014-08-09 14:00:00	11.6272	1.89375	-0.016
2014-08-09 15:00:00	11.1661	1.53819	-0.02
2014-08-09 16:00:00	10.3524	1.89931	-0.017
2014-08-09 17:00:00	8.4209	2.67083	-0.014
2014-08-09 18:00:00	7.37348	3.2684	-0.014
2014-08-09 19:00:00	6.74543	3.25556	-0.015
2014-08-09 20:00:00	4.88136	2.00451	-0.008
2014-08-09 21:00:00	4.35734	1.94097	-0.002
2014-08-09 22:00:00	3.81825	3.06285	-0.001
2014-08-09 23:00:00	3.79917	3.71285	0.003
2014-08-10	2.54409	3.67118	-0.001
2014-08-10 01:00:00	2.84938	3.61389	0.003
2014-08-10 02:00:00	3.79918	3.31597	0.006
2014-08-10 03:00:00	3.22252	4.07535	0.006
2014-08-10 04:00:00	3.45996	3.57049	0.008
2014-08-10 05:00:00	3.15529	3.5875	0.007
2014-08-10 06:00:00	3.22256	4.31354	0.008
2014-08-10 07:00:00	3.35832	4.85208	0.009
2014-08-10 08:00:00	3.46089	4.67917	0.006
2014-08-10 09:00:00	3.93489	4.71805	0.008
2014-08-10 10:00:00	4.51155	4.62569	0.008
2014-08-10 11:00:00	5.76664	3.7434	0.011
2014-08-10 12:00:00	5.85942	3.77118	0.01
2014-08-10 13:00:00	5.25226	3.3934	0.008
2014-08-10 14:00:00	5.3589	3.40313	0.01
2014-08-10 15:00:00	5.01947	3.12153	0.008
2014-08-10 16:00:00	5.05427	2.87917	0.012
2014-08-10 17:00:00	4.88466	3.22187	0.008
2014-08-10 18:00:00	4.74897	3.49063	0.009
2014-08-10 19:00:00	4.40976	2.67917	0.009
2014-08-10 20:00:00	4.03663	2.67674	0.004
2014-08-10 21:00:00	3.59565	3.49514	0.01
2014-08-10 22:00:00	3.18859	3.42083	0.011
2014-08-10 23:00:00	3.22455	2.52326	0.009
2014-08-11	2.96336	3.12639	0.009
2014-08-11 01:00:00	2.62971	2.38472	0.009
2014-08-11 02:00:00	2.59585	2.68542	0.008
2014-08-11 03:00:00	2.32439	2.43333	0.008
2014-08-11 04:00:00	2.66371	2.7368	0.01
2014-08-11 05:00:00	2.73158	2.68299	0.008
2014-08-11 06:00:00	2.73158	2.91597	0.009
2014-08-11 07:00:00	2.90124	2.95	0.009
2014-08-11 08:00:00	2.59585	3.79444	0.008
2014-08-11 09:00:00	3.13877	2.66181	0.011
2014-08-11 10:00:00	3.17271	2.80174	0.011
2014-08-11 11:00:00	3.27451	3.84444	0.011
2014-08-11 12:00:00	4.29249	3.23125	0.011
2014-08-11 13:00:00	4.95311	2.65799	0.01
2014-08-11 14:00:00	4.47763	2.76701	0.009
2014-08-11 15:00:00	3.93489	2.69028	0.009
2014-08-11 16:00:00	3.63059	2.24792	0.01
2014-08-11 17:00:00	3.60726	1.96458	0.014
2014-08-11 18:00:00	4.05014	1.20347	0.016
2014-08-11 19:00:00	4.00591	2.11007	0.014
2014-08-11 20:00:00	3.97808	1.6875	0.013
2014-08-11 21:00:00	3.30567	1.48507	0.01
2014-08-11 22:00:00	3.13877	1.08715	0.01
2014-08-11 23:00:00	2.66371	2.01805	0.008
2014-08-12	2.39225	2.43368	0.009
2014-08-12 01:00:00	2.05292	2.96146	0.009
2014-08-12 02:00:00	1.88326	3.51632	0.01
2014-08-12 03:00:00	1.7136	3.43958	0.01
2014-08-12 04:00:00	1.51	3.4309	0.007
2014-08-12 05:00:00	1.2046	3.5309	0.007
2014-08-12 06:00:00	0.865276	3.84549	0.007
2014-08-12 07:00:00	0.597294	3.29618	0.008
2014-08-12 08:00:00	1.78388	3.71111	0.012
2014-08-12 09:00:00	1.9851	4.43924	0.011
2014-08-12 10:00:00	2.76555	4.35417	0.011
2014-08-12 11:00:00	2.73162	4.71667	0.008
2014-08-12 12:00:00	2.59589	4.96632	0.009
2014-08-12 13:00:00	3.13881	4.47639	0.01
2014-08-12 14:00:00	3.13881	5.10868	0.008
2014-08-12 15:00:00	3.13881	4.16771	0.009
2014-08-12 16:00:00	2.93521	3.74444	0.007
2014-08-12 17:00:00	2.05296	5.29479	0.007
2014-08-12 18:00:00	1.84936	5.66632	0.005
2014-08-12 19:00:00	1.5779	6.08819	0.008
2014-08-12 20:00:00	1.8833	5.80069	0.002
2014-08-12 21:00:00	2.22263	3.81597	0.009
2014-08-12 22:00:00	2.22263	1.89167	0.007
2014-08-12 23:00:00	2.01903	1.3375	0.009
2014-08-13	2.73162	1.71701	0.012
2014-08-13 01:00:00	2.79948	3.56875	0.012
2014-08-13 02:00:00	2.25656	2.05104	0.01
2014-08-13 03:00:00	2.32443	1.18125	0.014
2014-08-13 04:00:00	2.32443	3.21389	0.012
2014-08-13 05:00:00	2.56195	3	0.014
2014-08-13 06:00:00	2.66375	1.04861	0.013
2014-08-13 07:00:00	2.90128	1.92847	0.014
2014-08-13 08:00:00	2.29049	1.93194	0.012
2014-08-13 09:00:00	2.01903	2.25625	0.012
2014-08-13 10:00:00	2.15476	1.87014	0.011
2014-08-13 11:00:00	2.39229	2.03472	0.014
2014-08-13 12:00:00	2.35836	5.21944	0.011
2014-08-13 13:00:00	2.59589	4.99653	0.01
2014-08-13 14:00:00	3.30848	4.55174	0.009
2014-08-13 15:00:00	3.51182	4.63819	0.01
2014-08-13 16:00:00	4.2473	4.10104	0.011
2014-08-13 17:00:00	4.88469	3.06806	0.011
2014-08-13 18:00:00	5.2239	2.76007	0.008
2014-08-13 19:00:00	5.02037	1.9941	0.007
2014-08-13 20:00:00	4.24018	1.90382	0.008
2014-08-13 21:00:00	2.51019	1.32535	0.003
2014-08-13 22:00:00	1.06588	0.665278	0.001
2014-08-13 23:00:00	1.44213	0.561805	0.006
2014-08-14	1.17067	0.591667	0.005
2014-08-14 01:00:00	0.69561	0.766319	0.004
2014-08-14 02:00:00	1.00101	0.659375	0.011
2014-08-14 03:00:00	1.2046	0.55	0.008
2014-08-14 04:00:00	1.7136	0.814236	0.009
2014-08-14 05:00:00	2.59585	0.737153	0.013
2014-08-14 06:00:00	4.66575	0.923264	0.011
2014-08-14 07:00:00	9.62155	0.617014	0
2014-08-14 08:00:00	9.42703	0.901736	-0.008
2014-08-14 09:00:00	9.49155	1.66215	-0.002
2014-08-14 10:00:00	9.45765	1.57361	-0.006
2014-08-14 11:00:00	9.29426	2.76042	0
2014-08-14 12:00:00	9.64141	3.27049	0
2014-08-14 13:00:00	9.90096	3.35903	-0.001
2014-08-14 14:00:00	9.49219	4.2434	-0.005
2014-08-14 15:00:00	9.25431	5.13229	-0.005
2014-08-14 16:00:00	9.05283	5.23542	-0.004
2014-08-14 17:00:00	7.83104	5.53576	-0.006
2014-08-14 18:00:00	7.01984	5.9059	-0.004
2014-08-14 19:00:00	5.86637	6.24861	-0.005
2014-08-14 20:00:00	4.7627	4.91632	-0.006
2014-08-14 21:00:00	3.57747	3.23264	-0.007
2014-08-14 22:00:00	2.42454	2.59965	-0.003
2014-08-14 23:00:00	1.2549	1.81806	-0.003
2014-08-15	1.22116	1.80903	-0.003
2014-08-15 01:00:00	0.20866	1.5691	-0.002
2014-08-15 02:00:00	-0.0848427	1.67743	-0.004
2014-08-15 03:00:00	0.0169563	1.59375	0
2014-08-15 04:00:00	-0.220573	1.8566	0.003
2014-08-15 05:00:00	0.32235	1.45521	0.004
2014-08-15 06:00:00	1.10281	1.58333	0
2014-08-15 07:00:00	2.73158	0.45	0.001
2014-08-15 08:00:00	4.8512	0.277431	0
2014-08-15 09:00:00	8.81956	0.547917	-0.005
2014-08-15 10:00:00	10.2495	0.941319	-0.005
2014-08-15 11:00:00	8.85899	2.24236	-0.005
2014-08-15 12:00:00	8.86646	3.47535	0
2014-08-15 13:00:00	8.79958	5.87986	0
2014-08-15 14:00:00	9.23658	6.23576	-0.003
2014-08-15 15:00:00	9.02974	6.0941	-0.001
2014-08-15 16:00:00	7.54087	7.34965	-0.006
2014-08-15 17:00:00	6.7989	7.71528	-0.002
2014-08-15 18:00:00	6.85664	6.04167	-0.008
2014-08-15 19:00:00	8.27243	4.00938	0
2014-08-15 20:00:00	7.28816	5.25278	-0.005
2014-08-15 21:00:00	5.93767	4.75	-0.005
2014-08-15 22:00:00	4.39129	4.86215	-0.011
2014-08-15 23:00:00	4.22176	3.14722	0.001
2014-08-16	2.64466	1.76146	-0.004
2014-08-16 01:00:00	4.51152	2.66736	0.007
2014-08-16 02:00:00	4.0027	4.29618	0.002
2014-08-16 03:00:00	4.37584	3.33438	0.007
2014-08-16 04:00:00	4.57937	3.75243	0.007
2014-08-16 05:00:00	5.4274	3.1434	0.005
2014-08-16 06:00:00	5.58981	3.13576	0.004
2014-08-16 07:00:00	7.81638	1.98785	0.003
2014-08-16 08:00:00	8.73179	3.41042	0.003
2014-08-16 09:00:00	8.66079	4.96458	0.003
2014-08-16 10:00:00	9.33773	5.87153	0.004
2014-08-16 11:00:00	10.1756	4.08785	0.002
2014-08-16 12:00:00	9.83143	3.8441	0.002
2014-08-16 13:00:00	10.5424	3.97431	-0.003
2014-08-16 14:00:00	8.74579	3.39792	-0.003
2014-08-16 15:00:00	8.20341	3.3816	-0.004
2014-08-16 16:00:00	6.37425	4.08889	-0.001
2014-08-16 17:00:00	6.08658	5.89792	-0.003
2014-08-16 18:00:00	7.30609	6.18194	-0.001
2014-08-16 19:00:00	6.68396	4.76632	-0.007
2014-08-16 20:00:00	4.89338	4.31701	-0.011
2014-08-16 21:00:00	3.91653	3.00243	-0.013
2014-08-16 22:00:00	2.69582	1.96146	-0.011
2014-08-16 23:00:00	1.25491	2.2184	-0.01
2014-08-17	0.440971	1.4434	-0.008
2014-08-17 01:00:00	1.33939	2.56597	-0.003
2014-08-17 02:00:00	1.51	2.45555	0.001
2014-08-17 03:00:00	1.7136	1.28993	-0.004
2014-08-17 04:00:00	0.593811	1.26562	-0.001
2014-08-17 05:00:00	2.86731	2.45	0
2014-08-17 06:00:00	2.95164	1.56354	-0.007
2014-08-17 07:00:00	6.49484	0.403125	-0.009
2014-08-17 08:00:00	7.73544	0.982639	-0.013
2014-08-17 09:00:00	8.64409	0.942361	-0.012
2014-08-17 10:00:00	10.6102	0.920486	-0.007
2014-08-17 11:00:00	10.4566	1.26528	-0.009
2014-08-17 12:00:00	10.1355	2.43715	-0.009
2014-08-17 13:00:00	10.492	2.52014	-0.012
2014-08-17 14:00:00	11.6063	2.86389	-0.012
2014-08-17 15:00:00	12.5212	2.25556	-0.015
2014-08-17 16:00:00	10.5558	0.945833	-0.013
2014-08-17 17:00:00	9.65247	1.49444	-0.008
2014-08-17 18:00:00	7.32203	1.8684	-0.011
2014-08-17 19:00:00	7.79661	1.16528	-0.008
2014-08-17 20:00:00	6.64407	1.42604	-0.015
2014-08-17 21:00:00	4.98295	1.4691	-0.017
2014-08-17 22:00:00	3.15839	0.539236	-0.017
2014-08-17 23:00:00	2.9671	0.625	-0.014
2014-08-18	2.3372	1.25972	-0.007
2014-08-18 01:00:00	1.5943	0.992361	-0.007
2014-08-18 02:00:00	0.0339127	0.810764	-0.011
2014-08-18 03:00:00	0.215187	1.28264	-0.009
2014-08-18 04:00:00	0.0508881	0.699306	-0.006
2014-08-18 05:00:00	3.07019	0.510764	-0.002
2014-08-18 06:00:00	3.25649	0.614583	-0.004
2014-08-18 07:00:00	7.42878	0.2625	-0.001
2014-08-18 08:00:00	6.42594	0.32118	-0.009
2014-08-18 09:00:00	6.42592	1.28194	-0.007
2014-08-18 10:00:00	6.32419	0.976042	-0.006
2014-08-18 11:00:00	7.7484	1.00104	-0.007
2014-08-18 12:00:00	8.38519	1.45799	-0.005
2014-08-18 13:00:00	7.43938	2.43021	-0.004
2014-08-18 14:00:00	6.49372	3.22222	-0.001
2014-08-18 15:00:00	6.4259	3.39236	0.005
2014-08-18 16:00:00	5.51033	3.23333	-0.005
2014-08-18 17:00:00	5.54424	2.71528	-0.003
2014-08-18 18:00:00	4.4011	2.40139	-0.004
2014-08-18 19:00:00	4.47759	2.38472	-0.003
2014-08-18 20:00:00	4.17231	1.87118	-0.002
2014-08-18 21:00:00	3.18859	1.08785	-0.004
2014-08-18 22:00:00	3.49389	1.91771	-0.001
2014-08-18 23:00:00	3.12075	1.90972	-0.002
2014-08-19	3.12075	1.63715	0
2014-08-19 01:00:00	3.16014	1.40972	0.001
2014-08-19 02:00:00	3.63749	1.44549	0.002
2014-08-19 03:00:00	2.88811	0.690972	0.002
2014-08-19 04:00:00	3.40575	0.895486	0.002
2014-08-19 05:00:00	2.96875	1.13194	0.002
2014-08-19 06:00:00	3.3763	1.62118	0.006
2014-08-19 07:00:00	3.27301	1.28646	0.008
2014-08-19 08:00:00	3.40964	1.36771	0.012
2014-08-19 09:00:00	3.64723	1.14444	0.012
2014-08-19 10:00:00	4.18051	1.42778	0.012
2014-08-19 11:00:00	5.56311	2.27743	0.009
2014-08-19 12:00:00	8.10721	3.28715	0.01
2014-08-19 13:00:00	6.49376	3.58125	0.009
2014-08-19 14:00:00	9.57953	3.84583	0.017
2014-08-19 15:00:00	7.68058	3.92118	0.01
2014-08-19 16:00:00	7.57885	3.66354	0.01
2014-08-19 17:00:00	8.22314	3.97951	0.013
2014-08-19 18:00:00	7.54495	3.64167	0.01
2014-08-19 19:00:00	7.10412	3.8	0.009
2014-08-19 20:00:00	6.90066	4.62083	0.007
2014-08-19 21:00:00	5.38626	4.22222	0.007
2014-08-19 22:00:00	5.4274	4.06771	0.005
2014-08-19 23:00:00	4.85074	4.37951	0.006
2014-08-20	4.37584	4.21632	0.006
2014-08-20 01:00:00	4.74897	5.17222	0.005
2014-08-20 02:00:00	4.20623	5.15069	0.004
2014-08-20 03:00:00	3.73134	5.13056	0.006
2014-08-20 04:00:00	3.69741	5.30208	0.006
2014-08-20 05:00:00	3.39212	4.32292	0.003
2014-08-20 06:00:00	3.25644	7.31042	0.003
2014-08-20 07:00:00	3.05291	7.19479	0.004
2014-08-20 08:00:00	3.29036	6.82743	0.005
2014-08-20 09:00:00	3.01899	5.99444	0.003
2014-08-20 10:00:00	3.18859	6.10868	0.004
2014-08-20 11:00:00	3.49389	6.45903	0.005
2014-08-20 12:00:00	3.62957	6.63472	0.005
2014-08-20 13:00:00	3.73134	6.6993	0.005
2014-08-20 14:00:00	3.66349	7.08403	0.005
2014-08-20 15:00:00	4.27407	5.37222	0.008
2014-08-20 16:00:00	6.95386	5.60278	0.01
2014-08-20 17:00:00	4.4776	6.54201	-0.001
2014-08-20 18:00:00	4.44368	6.39826	0.003
2014-08-20 19:00:00	3.76525	7.33403	0.005
2014-08-20 20:00:00	3.66349	7.85451	0.005
2014-08-20 21:00:00	3.56173	7.51215	0.004
2014-08-20 22:00:00	3.62957	6.65972	0.005
2014-08-20 23:00:00	3.76525	6.37014	0.004
2014-08-21	3.52781	5.66042	0.003
2014-08-21 01:00:00	3.39212	5.09896	0.004
2014-08-21 02:00:00	3.05291	4.85139	0.003
2014-08-21 03:00:00	3.05401	6.4316	0.004
2014-08-21 04:00:00	3.12235	6.0691	0.005
2014-08-21 05:00:00	2.68468	5.69201	0.005
2014-08-21 06:00:00	3.90218	5.51528	0.007
2014-08-21 07:00:00	4.17234	4.49896	0.007
2014-08-21 08:00:00	4.81684	4.91319	0.008
2014-08-21 09:00:00	4.98645	4.38403	0.007
2014-08-21 10:00:00	4.95253	4.97917	0.007
2014-08-21 11:00:00	5.42743	5.17604	0.01
2014-08-21 12:00:00	5.76664	4.6125	0.008
2014-08-21 13:00:00	6.54683	4.25035	0.008
2014-08-21 14:00:00	6.54683	3.90972	0.008
2014-08-21 15:00:00	7.48275	4.4368	0.007
2014-08-21 16:00:00	6.52765	3.74063	0.005
2014-08-21 17:00:00	6.02043	2.87708	0.007
2014-08-21 18:00:00	6.39866	2.51493	0.008
2014-08-21 19:00:00	5.99173	1.95243	0.006
2014-08-21 20:00:00	4.78166	0.766667	0.005
2014-08-21 21:00:00	4.4776	1.66979	0.003
2014-08-21 22:00:00	3.25644	2.03715	-0.001
2014-08-21 23:00:00	2.81546	2.67674	0.003
2014-08-22	3.39299	2.39583	0.004
2014-08-22 01:00:00	2.85316	1.68958	0.004
2014-08-22 02:00:00	2.89807	2.00417	0.004
2014-08-22 03:00:00	2.56192	1.22014	0.003
2014-08-22 04:00:00	2.83338	1.29271	0.005
2014-08-22 05:00:00	2.73158	0.928472	0.006
2014-08-22 06:00:00	3.13877	1.46493	0.01
2014-08-22 07:00:00	3.54597	1.51458	0.011
2014-08-22 08:00:00	3.98399	1.22014	0.012
2014-08-22 09:00:00	4.17357	0.916667	0.012
2014-08-22 10:00:00	4.61331	1.80208	0.01
2014-08-22 11:00:00	5.18998	2.05313	0.009
2014-08-22 12:00:00	5.42743	1.95625	0.01
2014-08-22 13:00:00	6.61467	1.22917	0.007
2014-08-22 14:00:00	7.03687	0.950347	0.007
2014-08-22 15:00:00	6.84172	4.57014	0.001
2014-08-22 16:00:00	4.90755	5.0059	0
2014-08-22 17:00:00	4.07055	4.30903	0
2014-08-22 18:00:00	3.93486	4.79305	0.001
2014-08-22 19:00:00	3.73134	5.02951	0.003
2014-08-22 20:00:00	4.07055	3.24514	0.003
2014-08-22 21:00:00	3.15468	2.27743	0.003
2014-08-22 22:00:00	2.9184	1.8375	0.001
2014-08-22 23:00:00	1.61023	1.22049	0.002
2014-08-23	2.49405	3.30556	0.003
2014-08-23 01:00:00	2.52798	3.27014	0.005
2014-08-23 02:00:00	2.66371	3.14514	0.004
2014-08-23 03:00:00	2.25652	1.20972	0.002
2014-08-23 04:00:00	2.12079	2.12986	0.003
2014-08-23 05:00:00	2.39225	2.33299	0.008
2014-08-23 06:00:00	2.42619	2.87604	0.003
2014-08-23 07:00:00	3.07091	2.34236	0.007
2014-08-23 08:00:00	4.36036	0.903472	0.008
2014-08-23 09:00:00	3.81632	2.89792	0.008
2014-08-23 10:00:00	3.57483	2.70035	0.008
2014-08-23 11:00:00	3.34218	1.74028	0.007
2014-08-23 12:00:00	5.56459	1.3875	0.008
2014-08-23 13:00:00	4.13842	1.31806	0.005
2014-08-23 14:00:00	3.90097	1.68958	0.007
2014-08-23 15:00:00	5.02037	2.35938	0.011
2014-08-23 16:00:00	5.66488	3.16076	0.009
2014-08-23 17:00:00	6.03629	3.62014	0.007
2014-08-23 18:00:00	5.32564	4.65521	0.008
2014-08-23 19:00:00	5.59701	4.18368	0.007
2014-08-23 20:00:00	4.61329	4.82847	0.006
2014-08-23 21:00:00	4.34192	4.59305	0.008
2014-08-23 22:00:00	4.0027	2.48056	0.007
2014-08-23 23:00:00	3.62957	2.25347	0.005
2014-08-24	3.12425	2.01389	0.006
2014-08-24 01:00:00	3.10187	0.907639	0.006
2014-08-24 02:00:00	3.24057	1.81701	0.007
2014-08-24 03:00:00	3.03698	0.933681	0.006
2014-08-24 04:00:00	3.41024	0.797222	0.007
2014-08-24 05:00:00	3.30844	0.269792	0.008
2014-08-24 06:00:00	4.46215	0.504861	0.011
2014-08-24 07:00:00	4.98685	0.55625	0.011
2014-08-24 08:00:00	4.98645	0.905555	0.01
2014-08-24 09:00:00	5.83448	0.872917	0.013
2014-08-24 10:00:00	7.72781	2.85764	0.012
2014-08-24 11:00:00	9.40999	2.49375	0.012
2014-08-24 12:00:00	8.24675	1.81042	0
2014-08-24 13:00:00	6.96841	3.46458	0.006
2014-08-24 14:00:00	8.96913	3.11736	0.011
2014-08-24 15:00:00	8.96913	1.72951	0.007
2014-08-24 16:00:00	6.96845	3.6875	0.007
2014-08-24 17:00:00	5.84943	3.4434	0.01
2014-08-24 18:00:00	5.11806	2.74514	0.013
2014-08-24 19:00:00	4.54545	2.16701	0.015
2014-08-24 20:00:00	3.45996	3.29965	0.013
2014-08-24 21:00:00	4.40976	2.84549	0.02
2014-08-24 22:00:00	3.93486	3.98194	0.018
2014-08-24 23:00:00	4.0027	3.61354	0.018
2014-08-25	4.51155	2.14618	0.021
2014-08-25 01:00:00	3.93489	1.94583	0.018
2014-08-25 02:00:00	3.90097	2.73993	0.018
2014-08-25 03:00:00	3.66352	1.57431	0.017
2014-08-25 04:00:00	3.39653	1.30694	0.017
2014-08-25 05:00:00	2.3219	2.2559	0.013
2014-08-25 06:00:00	2.29045	4.26597	0.012
2014-08-25 07:00:00	2.69765	4.77431	0.017
2014-08-25 08:00:00	3.17271	4.30104	0.019
2014-08-25 09:00:00	3.4781	4.80938	0.017
2014-08-25 10:00:00	3.5799	4.8743	0.017
2014-08-25 11:00:00	4.01274	5.73958	0.017
2014-08-25 12:00:00	4.61338	5.73785	0.017
2014-08-25 13:00:00	5.18998	5.86007	0.017
2014-08-25 14:00:00	4.78292	6.06944	0.013
2014-08-25 15:00:00	4.40979	6.80937	0.014
2014-08-25 16:00:00	4.17234	7.07674	0.01
2014-08-25 17:00:00	4.34194	6.43056	0.01
2014-08-25 18:00:00	4.13842	5.85278	0.009
2014-08-25 19:00:00	3.29038	6.72743	0.006
2014-08-25 20:00:00	2.51019	6.47743	0.008
2014-08-25 21:00:00	2.00137	5.88021	0.009
2014-08-25 22:00:00	1.86897	6.29063	0.011
2014-08-25 23:00:00	1.77964	6.59514	0.01
2014-08-26	1.78146	6.24236	0.013
2014-08-26 01:00:00	1.54393	6.99896	0.012
2014-08-26 02:00:00	1.2046	5.70208	0.01
2014-08-26 03:00:00	1.13674	4.17118	0.012
2014-08-26 04:00:00	1.44213	4.32535	0.013
2014-08-26 05:00:00	0.492012	2.81389	0.01
2014-08-26 06:00:00	1.3064	0.688542	0.013
2014-08-26 07:00:00	2.52798	0.642708	0.015
2014-08-26 08:00:00	2.96822	1.4441	0.016
2014-08-26 09:00:00	4.10545	1.37986	0.015
2014-08-26 10:00:00	5.05429	1.57431	0.014
2014-08-26 11:00:00	6.35979	1.38576	0.004
2014-08-26 12:00:00	6.29964	3.07292	0.008
2014-08-26 13:00:00	6.66345	3.93403	0.005
2014-08-26 14:00:00	7.47713	3.69444	0.001
2014-08-26 15:00:00	7.71449	3.31597	0.002
2014-08-26 16:00:00	7.78231	2.08264	0.001
2014-08-26 17:00:00	8.03688	1.30243	-0.004
2014-08-26 18:00:00	4.9575	2.20035	-0.001
2014-08-26 19:00:00	3.27228	1.19931	0.001
2014-08-26 20:00:00	2.63931	1.34583	0.004
2014-08-26 21:00:00	2.27272	1.33646	0.006
2014-08-26 22:00:00	1.62822	1.16424	0.008
2014-08-26 23:00:00	0.592167	1.35278	0.009
2014-08-27	1.44213	1.52431	0.011
2014-08-27 01:00:00	1.37427	1.33646	0.011
2014-08-27 02:00:00	-0.15271	1.21528	0.007
2014-08-27 03:00:00	-0.220573	1.87049	0.011
2014-08-27 04:00:00	-0.593834	1.19861	0.01
2014-08-27 05:00:00	-0.959392	1.30486	0.009
2014-08-27 06:00:00	1.98656	0.642708	0.01
2014-08-27 07:00:00	5.15906	0.194444	0.005
2014-08-27 08:00:00	8.52884	0.264583	-0.004
2014-08-27 09:00:00	9.57301	0.783681	-0.004
2014-08-27 10:00:00	10.0679	0.576042	-0.004
2014-08-27 11:00:00	5.52679	2.08611	0.003
2014-08-27 12:00:00	8.22312	2.33021	0.004
2014-08-27 13:00:00	12.4761	1.60278	-0.002
2014-08-27 14:00:00	10.0953	1.84167	-0.006
2014-08-27 15:00:00	11.5046	1.68229	-0.006
2014-08-27 16:00:00	11.0641	1.01806	-0.01
2014-08-27 17:00:00	6.40383	1.98021	-0.003
2014-08-27 18:00:00	6.17584	0.734722	0.004
2014-08-27 19:00:00	4.59416	0.429861	0.003
2014-08-27 20:00:00	3.27229	0.572222	0.003
2014-08-27 21:00:00	2.66757	1.12049	0.001
2014-08-27 22:00:00	1.89959	0.284722	0.004
2014-08-27 23:00:00	2.81546	1.33542	0.01
2014-08-28	2.64586	0.820139	0.01
2014-08-28 01:00:00	2.44403	0.709028	0.012
2014-08-28 02:00:00	3.29619	0.733333	0.015
2014-08-28 03:00:00	3.60222	0.797222	0.017
2014-08-28 04:00:00	2.72183	0.471875	0.014
2014-08-28 05:00:00	2.4564	0.494097	0.012
2014-08-28 06:00:00	3.34017	0.465972	0.019
2014-08-28 07:00:00	4.75209	0.664583	0.019
2014-08-28 08:00:00	5.69879	0.264236	0.018
2014-08-28 09:00:00	7.05565	0.401042	0.015
2014-08-28 10:00:00	8.08889	0.194097	0.011
2014-08-28 11:00:00	7.98578	0.784375	0.01
2014-08-28 12:00:00	8.7657	1.43194	0.012
2014-08-28 13:00:00	8.15532	2.19375	0.015
2014-08-28 14:00:00	9.23943	1.17118	0.013
2014-08-28 15:00:00	8.92254	0.992708	0.012
2014-08-28 16:00:00	8.55563	1.25104	0.013
2014-08-28 17:00:00	8.45249	0.987847	0.012
2014-08-28 18:00:00	8.34952	0.82743	0.012
2014-08-28 19:00:00	7.42959	0.369444	0.01
2014-08-28 20:00:00	6.79871	0.679861	0.011
2014-08-28 21:00:00	5.4086	0.940625	0.008
2014-08-28 22:00:00	5.00169	0.69375	0.01
2014-08-28 23:00:00	3.72621	0.70243	0.006
2014-08-29	2.7137	1.27118	0.007
2014-08-29 01:00:00	1.66214	1.30104	0.008
2014-08-29 02:00:00	1.29858	1.91701	0.014
2014-08-29 03:00:00	-0.186657	0.700347	0.004
2014-08-29 04:00:00	-0.254509	0.76493	0.008
2014-08-29 05:00:00	0.593811	0.621528	0.012
2014-08-29 06:00:00	3.8853	0.394444	0.007
2014-08-29 07:00:00	7.05566	0.21875	0.002
2014-08-29 08:00:00	5.91727	1.3125	0
2014-08-29 09:00:00	9.91863	0.738889	0
2014-08-29 10:00:00	10.2386	0.755556	-0.002
2014-08-29 11:00:00	9.32231	1.19931	0.004
2014-08-29 12:00:00	7.93232	2.18125	-0.001
2014-08-29 13:00:00	7.1206	2.64826	-0.004
2014-08-29 14:00:00	7.18654	2.74271	-0.005
2014-08-29 15:00:00	6.95151	2.69514	-0.008
2014-08-29 16:00:00	4.3465	2.70799	-0.008
2014-08-29 17:00:00	4.12003	2.10174	-0.004
2014-08-29 18:00:00	3.91657	1.84896	-0.005
2014-08-29 19:00:00	3.23838	2.30521	-0.002
2014-08-29 20:00:00	2.52627	1.77847	-0.002
2014-08-29 21:00:00	0.880203	2.625	-0.003
2014-08-29 22:00:00	0.610577	3.3566	0.005
2014-08-29 23:00:00	0.016819	2.53472	0.006
2014-08-30	-0.356308	2.58785	0.007
2014-08-30 01:00:00	-0.0169792	2.2875	0.008
2014-08-30 02:00:00	-0.933163	1.6934	0.008
2014-08-30 03:00:00	-1.71048	1.57257	0.008
2014-08-30 04:00:00	-1.19625	1.03333	0.008
2014-08-30 05:00:00	-1.94167	1.41007	0.005
2014-08-30 06:00:00	1.07484	0.848611	0.007
2014-08-30 07:00:00	4.58908	0.600694	0.004
2014-08-30 08:00:00	8.39579	0.258681	-0.004
2014-08-30 09:00:00	4.89998	1.93958	0
2014-08-30 10:00:00	5.31084	2.79028	0.006
2014-08-30 11:00:00	6.16471	2.45139	0.009
2014-08-30 12:00:00	7.64669	1.60035	0.003
2014-08-30 13:00:00	10.7469	1.11701	-0.007
2014-08-30 14:00:00	9.86443	2.16181	-0.003
2014-08-30 15:00:00	8.84749	3.93056	0
2014-08-30 16:00:00	7.62821	3.56667	-0.001
2014-08-30 17:00:00	6.68956	4.62118	-0.001
2014-08-30 18:00:00	6.05289	4.01632	0.004
2014-08-30 19:00:00	5.71214	2.87847	0.002
2014-08-30 20:00:00	3.88252	2.20625	-0.001
2014-08-30 21:00:00	2.15326	2.53507	-0.003
2014-08-30 22:00:00	1.59428	2.94583	0.006
2014-08-30 23:00:00	0.984577	2.23333	0.008
2014-08-31	0.933106	2.76875	0.005
2014-08-31 01:00:00	-0.186642	1.72917	0.009
2014-08-31 02:00:00	-1.34036	1.35625	0.008
2014-08-31 03:00:00	-1.10283	2.7875	0.009
2014-08-31 04:00:00	-1.40389	2.21493	0.009
2014-08-31 05:00:00	-2.31569	0.566667	0.007
2014-08-31 06:00:00	3.64903	1.15104	0.01
2014-08-31 07:00:00	4.51265	0.51493	0.001
2014-08-31 08:00:00	8.42696	0.342708	-0.007
2014-08-31 09:00:00	6.35463	0.499653	-0.007
2014-08-31 10:00:00	6.83176	1.05521	-0.004
2014-08-31 11:00:00	9.23627	1.05347	-0.004
2014-08-31 12:00:00	10.1721	1.32083	-0.002
2014-08-31 13:00:00	11.0848	1.6875	-0.005
2014-08-31 14:00:00	12.2965	1.26215	-0.007
2014-08-31 15:00:00	11.7418	1.16701	-0.015
2014-08-31 16:00:00	9.09863	2.07743	-0.012
2014-08-31 17:00:00	9.23709	1.99722	-0.01
2014-08-31 18:00:00	7.27734	1.51597	-0.012
2014-08-31 19:00:00	6.21825	0.896528	-0.016
2014-08-31 20:00:00	2.91384	0.812847	-0.017
2014-08-31 21:00:00	0.52232	0.707986	-0.015
2014-08-31 22:00:00	2.1338	1.18472	-0.002
2014-08-31 23:00:00	-0.373142	0.8875	0
2014-09-01	1.3607	1.89271	0.004
2014-09-01 01:00:00	0.15255	1.17049	0.002
2014-09-01 02:00:00	0.186619	1.49028	0.007
2014-09-01 03:00:00	0.0169563	1.84896	0.007
2014-09-01 04:00:00	-0.322372	1.4066	0.005
2014-09-01 05:00:00	0.220551	1.07396	0.015
2014-09-01 06:00:00	2.56192	0.973958	0.008
2014-09-01 07:00:00	5.53029	1.1	0.004
2014-09-01 08:00:00	6.19177	1.0934	-0.001
2014-09-01 09:00:00	5.81554	3.03264	0.005
2014-09-01 10:00:00	6.6972	2.63229	0.008
2014-09-01 11:00:00	8.59615	2.03125	0.005
2014-09-01 12:00:00	8.0875	3.85799	0.007
2014-09-01 13:00:00	9.36592	3.6441	0.002
2014-09-01 14:00:00	11.1187	2.49722	0
2014-09-01 15:00:00	11.0848	2.42222	-0.004
2014-09-01 16:00:00	8.00003	2.26632	-0.002
2014-09-01 17:00:00	6.57645	1.7566	0.003
2014-09-01 18:00:00	6.08676	1.88681	0.007
2014-09-01 19:00:00	5.95116	1.57674	0.014
2014-09-01 20:00:00	4.56086	1.38056	0.008
2014-09-01 21:00:00	3.07972	1.93785	-0.003
2014-09-01 22:00:00	3.93486	1.60972	0.01
2014-09-01 23:00:00	4.71505	1.16944	0.013
2014-09-02	4.57937	2.47153	0.012
2014-09-02 01:00:00	4.03663	3.2441	0.003
2014-09-02 02:00:00	3.96878	3.55868	0.009
2014-09-02 03:00:00	3.3582	4.18194	0.005
2014-09-02 04:00:00	1.08548	1.23333	-0.001
2014-09-02 05:00:00	2.62814	1.64236	0.006
2014-09-02 06:00:00	2.78362	1.39618	-0.003
2014-09-02 07:00:00	6.1737	0.861458	-0.001
2014-09-02 08:00:00	6.29034	1.14201	-0.003
2014-09-02 09:00:00	8.56224	1.49861	-0.003
2014-09-02 10:00:00	6.71754	1.76215	0.001
2014-09-02 11:00:00	6.93454	4.35938	0.001
2014-09-02 12:00:00	4.83214	5.41528	0.006
2014-09-02 13:00:00	6.62936	4.73229	0.005
2014-09-02 14:00:00	7.98575	5.64514	-0.002
2014-09-02 15:00:00	6.90064	7.0059	-0.008
2014-09-02 16:00:00	5.27296	7.83437	-0.006
2014-09-02 17:00:00	4.52695	7.75035	-0.004
2014-09-02 18:00:00	3.78141	6.65139	-0.007
2014-09-02 19:00:00	3.11074	4.45139	-0.007
2014-09-02 20:00:00	1.16995	1.60694	-0.018
2014-09-02 21:00:00	0.237408	2.9316	-0.007
2014-09-02 22:00:00	-0.798245	3.35139	-0.005
2014-09-02 23:00:00	-1.54395	1.42743	0
2014-09-03	-1.64575	2.01632	-0.003
2014-09-03 01:00:00	-1.70949	2.5625	0.002
2014-09-03 02:00:00	-2.18035	2.58264	0.001
2014-09-03 03:00:00	-2.20676	1.11111	0.002
2014-09-03 04:00:00	-2.13851	1.56354	0.004
2014-09-03 05:00:00	-2.10457	2.11736	0.006
2014-09-03 06:00:00	0.203648	1.17951	0.006
2014-09-03 07:00:00	4.08905	0.396875	-0.002
2014-09-03 08:00:00	6.70934	0.319097	-0.01
2014-09-03 09:00:00	7.51104	0.471528	-0.009
2014-09-03 10:00:00	7.91795	0.684028	-0.012
2014-09-03 11:00:00	8.73179	0.723611	-0.005
2014-09-03 12:00:00	8.90033	1.26042	-0.007
2014-09-03 13:00:00	10.2035	1.12986	-0.009
2014-09-03 14:00:00	9.05087	1.99028	-0.008
2014-09-03 15:00:00	9.82711	1.3441	-0.016
2014-09-03 16:00:00	9.3361	1.52951	-0.018
2014-09-03 17:00:00	4.30497	1.94236	-0.015
2014-09-03 18:00:00	6.23731	0.814583	-0.015
2014-09-03 19:00:00	3.08723	0.535069	-0.017
2014-09-03 20:00:00	1.06814	0.732292	-0.012
2014-09-03 21:00:00	-0.373234	1.12187	-0.01
2014-09-03 22:00:00	0.383362	1.95694	-0.002
2014-09-03 23:00:00	0.763477	0.919792	0.001
2014-09-04	0.831341	1.3684	0.004
2014-09-04 01:00:00	0.118751	0.593403	0.002
2014-09-04 02:00:00	0.559879	0.634722	0.004
2014-09-04 03:00:00	-0.695633	0.436458	-0.003
2014-09-04 04:00:00	0.424149	0.941667	0.003
2014-09-04 05:00:00	-0.0161896	0.857292	0.003
2014-09-04 06:00:00	0.186657	0.32118	-0.001
2014-09-04 07:00:00	2.05296	0.184028	0.002
2014-09-04 08:00:00	4.11029	0.539583	0.005
2014-09-04 09:00:00	7.83584	0.333333	0.002
2014-09-04 10:00:00	11.4787	0.636806	-0.008
2014-09-04 11:00:00	5.23869	1.12743	-0.005
2014-09-04 12:00:00	7.20582	1.0816	-0.001
2014-09-04 13:00:00	8.4944	1.21319	-0.002
2014-09-04 14:00:00	8.1892	1.41458	-0.007
2014-09-04 15:00:00	10.1899	0.887153	-0.009
2014-09-04 16:00:00	9.32214	1.83958	-0.013
2014-09-04 17:00:00	7.35596	1.97951	-0.011
2014-09-04 18:00:00	6.67799	0.908681	-0.013
2014-09-04 19:00:00	2.81358	0.464236	-0.02
2014-09-04 20:00:00	1.61052	1.43924	-0.011
2014-09-04 21:00:00	-0.203617	0.668403	-0.005
2014-09-04 22:00:00	0.479404	2.43056	-0.003
2014-09-04 23:00:00	0.186619	1.66944	-0.001
2014-09-05	0.390217	1.20555	0
2014-09-05 01:00:00	-0.0169792	1.8809	-0.002
2014-09-05 02:00:00	-0.525971	0.931944	-0.007
2014-09-05 03:00:00	-1.06835	1.12917	0.002
2014-09-05 04:00:00	-0.821907	1.60764	-0.001
2014-09-05 05:00:00	-0.856743	0.601042	-0.003
2014-09-05 06:00:00	2.16251	0.902431	-0.003
2014-09-05 07:00:00	0.899246	0.931944	-0.008
2014-09-05 08:00:00	1.74757	0.488542	0.001
2014-09-05 09:00:00	3.24061	0.908333	0.008
2014-09-05 10:00:00	5.5975	0.242014	0.007
2014-09-05 11:00:00	4.57939	1.4566	0.01
2014-09-05 12:00:00	5.63095	1.01528	0.005
2014-09-05 13:00:00	6.07193	1.62604	0.004
2014-09-05 14:00:00	7.32687	1.04965	-0.003
2014-09-05 15:00:00	10.2578	0.383333	-0.01
2014-09-05 16:00:00	9.5274	0.336458	-0.004
2014-09-05 17:00:00	7.25537	0.743055	-0.002
2014-09-05 18:00:00	6.59113	0.914583	0.001
2014-09-05 19:00:00	4.79823	1.42535	0.001
2014-09-05 20:00:00	3.96786	1.46076	-0.001
2014-09-05 21:00:00	1.35685	0.515278	0
2014-09-05 22:00:00	1.0569	0.377431	-0.001
2014-09-05 23:00:00	1.00101	0.420139	0.003
2014-09-06	0.831341	0.612847	0.006
2014-09-06 01:00:00	0.32235	0.734722	0
2014-09-06 02:00:00	0.797409	0.3375	0.003
2014-09-06 03:00:00	1.51	0.376389	0.004
2014-09-06 04:00:00	0.729542	0.3875	0.001
2014-09-06 05:00:00	0.254486	0.565625	-0.003
2014-09-06 06:00:00	0.525948	0.826042	0.001
2014-09-06 07:00:00	2.05292	1.66562	0.001
2014-09-06 08:00:00	3.32613	1.27882	0.003
2014-09-06 09:00:00	2.71372	1.86944	-0.001
2014-09-06 10:00:00	5.35958	0.69618	-0.001
2014-09-06 11:00:00	6.68251	0.655903	-0.005
2014-09-06 12:00:00	4.4746	0.987847	-0.007
2014-09-06 13:00:00	4.61329	1.3434	-0.003
2014-09-06 14:00:00	4.34192	0.855208	0.002
2014-09-06 15:00:00	3.66349	0.971181	0
2014-09-06 16:00:00	2.78154	1.70278	0.005
2014-09-06 17:00:00	2.88526	0.85243	0.004
2014-09-06 18:00:00	2.1844	0.690625	0.004
2014-09-06 19:00:00	2.05292	0.639236	0.004
2014-09-06 20:00:00	1.4082	1.21632	0.002
2014-09-06 21:00:00	1.27247	1.23056	0.002
2014-09-06 22:00:00	0.627747	2.57882	0.001
2014-09-06 23:00:00	-0.220573	1.78715	0
2014-09-07	-0.212841	1.83576	0.005
2014-09-07 01:00:00	-0.75428	1.63542	0.004
2014-09-07 02:00:00	-1.0527	1.68125	0.005
2014-09-07 03:00:00	-0.746792	0.955208	0.008
2014-09-07 04:00:00	-0.882568	0.531597	0.009
2014-09-07 05:00:00	-1.15413	1.62986	0.008
2014-09-07 06:00:00	-1.62935	1.63681	0.008
2014-09-07 07:00:00	-1.15413	1.59236	0.011
2014-09-07 08:00:00	-0.780735	1.5309	0.008
2014-09-07 09:00:00	-0.373406	2.17778	0.007
2014-09-07 10:00:00	0.441261	1.26771	0.008
2014-09-07 11:00:00	0.942203	1.53438	0.005
2014-09-07 12:00:00	4.49617	1.34514	0.003
2014-09-07 13:00:00	7.1239	0.85	-0.002
2014-09-07 14:00:00	7.4429	1.17396	-0.011
2014-09-07 15:00:00	7.3567	1.09653	-0.018
2014-09-07 16:00:00	7.32206	1.85382	-0.011
2014-09-07 17:00:00	4.89988	3.83472	-0.006
2014-09-07 18:00:00	4.30728	2.93785	-0.002
2014-09-07 19:00:00	2.06897	0.920486	-0.011
2014-09-07 20:00:00	-0.915985	0.787153	-0.01
2014-09-07 21:00:00	-1.10386	1.70625	0.003
2014-09-07 22:00:00	-2.01901	1.49549	0.005
2014-09-07 23:00:00	-1.83994	2.03125	0.004
2014-09-08	-3.29274	3.04236	0.006
2014-09-08 01:00:00	-3.46234	2.54271	0.007
2014-09-08 02:00:00	-3.69852	1.82431	0.015
2014-09-08 03:00:00	-3.75734	1.71528	0.009
2014-09-08 04:00:00	-3.55088	1.99444	0.013
2014-09-08 05:00:00	-4.23137	2.10278	0.013
2014-09-08 06:00:00	-2.22412	1.95799	0.012
2014-09-08 07:00:00	-0.100113	1.40417	0.019
2014-09-08 08:00:00	2.22435	1.04896	0.006
2014-09-08 09:00:00	4.83377	0.747222	-0.01
2014-09-08 10:00:00	5.63095	0.349305	-0.002
2014-09-08 11:00:00	5.68636	0.685764	-0.013
2014-09-08 12:00:00	7.71449	0.995833	-0.007
2014-09-08 13:00:00	9.91331	0.653819	-0.018
2014-09-08 14:00:00	5.18647	1.57465	-0.02
2014-09-08 15:00:00	6.00848	2.30347	-0.017
2014-09-08 16:00:00	4.28956	2.76875	-0.02
2014-09-08 17:00:00	2.66191	2.71701	-0.02
2014-09-08 18:00:00	1.49202	1.85069	-0.012
2014-09-08 19:00:00	0.305283	1.02535	-0.013
2014-09-08 20:00:00	-1.14702	0.831597	-0.006
2014-09-08 21:00:00	-1.88328	2.7368	0.002
2014-09-08 22:00:00	-1.875	2.44653	0.003
2014-09-08 23:00:00	-3.19368	1.00069	0.007
2014-09-09	-2.98712	1.3066	0.009
2014-09-09 01:00:00	-2.91923	2.37292	0.008
2014-09-09 02:00:00	-2.95317	1.75417	0.01
2014-09-09 03:00:00	-3.05288	1.47465	0.012
2014-09-09 04:00:00	-3.0835	1.48785	0.013
2014-09-09 05:00:00	-2.80685	2.67778	0.015
2014-09-09 06:00:00	-1.37954	1.84722	0.014
2014-09-09 07:00:00	1.22205	1.39236	0.016
2014-09-09 08:00:00	0.424397	0.916667	0.009
2014-09-09 09:00:00	2.39229	0.492014	0.01
2014-09-09 10:00:00	5.20455	0.307986	0.005
2014-09-09 11:00:00	5.12213	0.865625	0.005
2014-09-09 12:00:00	5.18998	1.31354	-0.001
2014-09-09 13:00:00	5.59703	1.34792	-0.005
2014-09-09 14:00:00	5.42743	1.79097	-0.009
2014-09-09 15:00:00	4.6293	2.16528	-0.007
2014-09-09 16:00:00	4.40949	2.84931	-0.006
2014-09-09 17:00:00	2.61193	2.81285	-0.006
2014-09-09 18:00:00	1.7639	3.09931	-0.006
2014-09-09 19:00:00	0.864304	3.70625	-0.005
2014-09-09 20:00:00	-0.593834	3.22674	-0.002
2014-09-09 21:00:00	-0.729568	1.03507	0.007
2014-09-09 22:00:00	0.8666	2.32569	0.005
2014-09-09 23:00:00	0.494091	4.52153	0.004
2014-09-10	0.699268	3.6809	0.005
2014-09-10 01:00:00	0.566002	3.20764	0.003
2014-09-10 02:00:00	0.158848	3.33299	0.002
2014-09-10 03:00:00	0.128025	3.89514	0.002
2014-09-10 04:00:00	-0.482513	5.03993	0.005
2014-09-10 05:00:00	-0.0741348	4.18507	0.005
2014-09-10 06:00:00	-0.0419159	4.24271	0.006
2014-09-10 07:00:00	0.433666	2.96319	0.005
2014-09-10 08:00:00	1.07567	3.0441	0.009
2014-09-10 09:00:00	0.973064	2.60868	0.005
2014-09-10 10:00:00	1.00556	2.81875	0
2014-09-10 11:00:00	1.00473	4.26806	0.001
2014-09-10 12:00:00	1.24215	3.65243	0.004
2014-09-10 13:00:00	1.17238	5.01875	0.004
2014-09-10 14:00:00	1.03529	6.37257	0.005
2014-09-10 15:00:00	0.86583	5.77431	0.001
2014-09-10 16:00:00	0.395267	6.61493	-0.007
2014-09-10 17:00:00	0.0574226	5.45868	0.001
2014-09-10 18:00:00	-0.3475	3.97187	-0.002
2014-09-10 19:00:00	-0.177727	3.21771	0
2014-09-10 20:00:00	-0.482819	3.15799	0
2014-09-10 21:00:00	-0.543781	4.89444	0.001
2014-09-10 22:00:00	-0.678921	4.78715	0.003
2014-09-10 23:00:00	-0.746853	5.28472	0.005
2014-09-11	-1.15413	4.97604	0.005
2014-09-11 01:00:00	-1.42568	5.01389	-0.001
2014-09-11 02:00:00	-1.42568	5.54583	0.005
2014-09-11 03:00:00	-1.52751	4.61771	0.004
2014-09-11 04:00:00	-1.93484	4.58507	0.005
2014-09-11 05:00:00	-1.79906	4.06944	0.007
2014-09-11 06:00:00	-1.69723	3.33542	0.004
2014-09-11 07:00:00	-1.32384	3.45903	0.009
2014-09-11 08:00:00	-1.01835	3.63194	0.006
2014-09-11 09:00:00	-0.746792	3.80938	0.003
2014-09-11 10:00:00	-1.08624	3.88437	0.002
2014-09-11 11:00:00	0.644924	3.39514	0.001
2014-09-11 12:00:00	1.69475	3.26319	-0.002
2014-09-11 13:00:00	1.04418	4.87153	0.002
2014-09-11 14:00:00	1.04211	4.10347	0.004
2014-09-11 15:00:00	2.63236	4.50764	0.006
2014-09-11 16:00:00	3.27454	4.62014	0.005
2014-09-11 17:00:00	2.52802	4.87465	-0.006
2014-09-11 18:00:00	-0.35627	4.47049	-0.002
2014-09-11 19:00:00	-0.483845	4.34757	0.001
2014-09-11 20:00:00	-1.19083	5.73194	-0.003
2014-09-11 21:00:00	-1.42568	5.38958	0
2014-09-11 22:00:00	-1.45962	5.37396	0.001
2014-09-11 23:00:00	-1.42568	5.08889	-0.001
2014-09-12	-1.69723	4.3309	0.001
2014-09-12 01:00:00	-2.74951	3.21146	-0.001
2014-09-12 02:00:00	-2.91871	1.91562	-0.002
2014-09-12 03:00:00	-2.77696	1.57917	-0.002
2014-09-12 04:00:00	-1.68816	1.8625	0.001
2014-09-12 05:00:00	-2.53619	1.01597	-0.003
2014-09-12 06:00:00	-2.43255	1.19549	-0.002
2014-09-12 07:00:00	-1.99083	1.60451	-0.004
2014-09-12 08:00:00	-1.82443	2.3434	-0.005
2014-09-12 09:00:00	-1.92677	2.09375	-0.004
2014-09-12 10:00:00	-1.15043	3.66562	-0.002
2014-09-12 11:00:00	2.13851	2.66632	0.01
2014-09-12 12:00:00	1.00303	3.55868	0.006
2014-09-12 13:00:00	1.44334	4.58542	0.005
2014-09-12 14:00:00	1.06942	5.6559	0.003
2014-09-12 15:00:00	-0.313663	5.87326	-0.003
2014-09-12 16:00:00	-0.0696373	5.11285	0.008
2014-09-12 17:00:00	-0.714207	5.47118	0.017
2014-09-12 18:00:00	-0.984402	5.35799	0.019
2014-09-12 19:00:00	-1.25595	5.55417	0.023
2014-09-12 20:00:00	-1.39173	5.14271	0.024
2014-09-12 21:00:00	-1.18807	5.84896	0.022
2014-09-12 22:00:00	-1.08624	5.50208	0.026
2014-09-12 23:00:00	-1.08624	6.17326	0.036
2014-09-13	-1.25595	7.22396	0.031
2014-09-13 01:00:00	-1.45962	6.31042	0.026
2014-09-13 02:00:00	-1.35779	6.05833	0.026
2014-09-13 03:00:00	-1.42568	5.95104	0.05
2014-09-13 04:00:00	-1.35779	5.70937	0.047
2014-09-13 05:00:00	-1.2899	4.9191	0.044
2014-09-13 06:00:00	-1.56146	4.99236	0.045
2014-09-13 07:00:00	-0.848625	4.38264	0.068
2014-09-13 08:00:00	-0.135796	4.67847	0.039
2014-09-13 09:00:00	0.135761	3.63368	0.05
2014-09-13 10:00:00	-0.407349	3.38056	0.081
2014-09-13 11:00:00	0.609444	3.55833	0.079
2014-09-13 12:00:00	0.933628	3.15313	0.071
2014-09-13 13:00:00	1.10284	3.8566	0.058
2014-09-13 14:00:00	4.14098	2.90625	0.047
2014-09-13 15:00:00	0.745976	2.05104	0.029
2014-09-13 16:00:00	-0.949802	1.00417	0.033
2014-09-13 17:00:00	-1.47724	1.35486	0.049
2014-09-13 18:00:00	-1.64575	2.38472	0.051
2014-09-13 19:00:00	-2.24264	2.47674	0.057
2014-09-13 20:00:00	-3.22473	1.05139	0.052
2014-09-13 21:00:00	-4.57621	2.25069	0.05
2014-09-13 22:00:00	-5.17846	3.14826	0.054
2014-09-13 23:00:00	-4.94058	3.15521	0.057
2014-09-14	-5.17827	3.49514	0.063
2014-09-14 01:00:00	-3.58235	2.75382	0.064
2014-09-14 02:00:00	-2.56367	1.27118	0.07
2014-09-14 03:00:00	-2.6995	1.07118	0.065
2014-09-14 04:00:00	-2.83532	1.91042	0.066
2014-09-14 05:00:00	-3.03905	3.80278	0.062
2014-09-14 06:00:00	-3.48048	4.01597	0.058
2014-09-14 07:00:00	-2.93719	3.83472	0.065
2014-09-14 08:00:00	-1.81746	2.68715	0.061
2014-09-14 09:00:00	1.19161	2.39132	0.059
2014-09-14 10:00:00	1.9175	1.73576	0.059
2014-09-14 11:00:00	4.29253	3.71285	0.056
2014-09-14 12:00:00	6.37958	3.78299	0.042
2014-09-14 13:00:00	5.93625	2.16458	0.032
2014-09-14 14:00:00	4.90174	1.82986	0.03
2014-09-14 15:00:00	3.763	2.60347	0.029
2014-09-14 16:00:00	2.88331	4.6684	0.031
2014-09-14 17:00:00	1.88279	4.3625	0.032
2014-09-14 18:00:00	1.17067	3.17708	0.028
2014-09-14 19:00:00	0.118751	3.77604	0.028
2014-09-14 20:00:00	0.255909	3.85104	0.038
2014-09-14 21:00:00	0.0898781	5.20312	0.036
2014-09-14 22:00:00	-0.0762749	4.7184	0.034
2014-09-14 23:00:00	0.0266571	3.57882	0.035
2014-09-15	0.263523	4.78785	0.035
2014-09-15 01:00:00	-0.0762367	3.20972	0.036
2014-09-15 02:00:00	-0.176781	2.42604	0.038
2014-09-15 03:00:00	0.0263023	3.37708	0.038
2014-09-15 04:00:00	0.331848	3.15382	0.037
2014-09-15 05:00:00	-0.617649	1.78715	0.036
2014-09-15 06:00:00	0.166622	1.09896	0.037
2014-09-15 07:00:00	-0.0358353	2.05313	0.039
2014-09-15 08:00:00	0.707233	1.57951	0.038
2014-09-15 09:00:00	1.34255	1.09444	0.037
2014-09-15 10:00:00	2.12083	1.76458	0.037
2014-09-15 11:00:00	3.7496	0.808681	0.035
2014-09-15 12:00:00	1.98486	3.18056	0.032
2014-09-15 13:00:00	2.56192	4.06667	0.031
2014-09-15 14:00:00	5.12917	2.31354	0.031
2014-09-15 15:00:00	4.10449	1.21806	0.029
2014-09-15 16:00:00	5.01465	2.01354	0.025
2014-09-15 17:00:00	3.42604	3.6118	0.027
2014-09-15 18:00:00	1.62822	3.78194	0.03
2014-09-15 19:00:00	1.40818	4.84028	0.035
2014-09-15 20:00:00	1.17067	4.07917	0.035
2014-09-15 21:00:00	0.627747	2.39583	0.036
2014-09-15 22:00:00	1.00101	1.8816	0.038
2014-09-15 23:00:00	0.220551	3.81979	0.033
2014-09-16	-0.661701	2.07639	0.03
2014-09-16 01:00:00	-0.347958	2.71493	0.034
2014-09-16 02:00:00	-1.738	2.04028	0.029
2014-09-16 03:00:00	-2.47823	3.29514	0.029
2014-09-16 04:00:00	-2.24034	1.49618	0.036
2014-09-16 05:00:00	0.339428	5.0434	0.038
2014-09-16 06:00:00	0.203648	2.33472	0.042
2014-09-16 07:00:00	1.65811	3.64444	0.04
2014-09-16 08:00:00	2.76648	3.25104	0.039
2014-09-16 09:00:00	2.39229	5.26042	0.036
2014-09-16 10:00:00	2.0869	4.93264	0.034
2014-09-16 11:00:00	3.13881	5.35174	0.03
2014-09-16 12:00:00	2.90128	3.3566	0.035
2014-09-16 13:00:00	2.0869	3.88993	0.03
2014-09-16 14:00:00	1.17071	1.3875	0.026
2014-09-16 15:00:00	0.933178	1.96354	0.025
2014-09-16 16:00:00	-0.254471	2.16319	0.022
2014-09-16 17:00:00	-0.589817	1.27118	0.021
2014-09-16 18:00:00	-1.19449	1.52986	0.025
2014-09-16 19:00:00	-2.27439	2.97917	0.026
2014-09-16 20:00:00	-1.01835	3.08819	0.03
2014-09-16 21:00:00	-3.15684	3.43438	0.022
2014-09-16 22:00:00	-4.506	4.73646	0.024
2014-09-16 23:00:00	-3.00996	1.90833	0.032
2014-09-17	-2.02637	2.23264	0.031
2014-09-17 01:00:00	-3.04443	1.92743	0.031
2014-09-17 02:00:00	-4.49952	1.42188	0.029
2014-09-17 03:00:00	-6.36673	1.53646	0.025
2014-09-17 04:00:00	-6.5312	2.95521	0.025
2014-09-17 05:00:00	-6.01893	1.4243	0.033
2014-09-17 06:00:00	-4.93291	1.70035	0.035
2014-09-17 07:00:00	-4.52534	1.01458	0.033
2014-09-17 08:00:00	-3.24254	0.496528	0.037
2014-09-17 09:00:00	-1.03854	0.274305	0.033
2014-09-17 10:00:00	-0.33939	1.40417	0.03
2014-09-17 11:00:00	4.63406	0.551042	0.019
2014-09-17 12:00:00	1.34037	2.38125	0.022
2014-09-17 13:00:00	0.152725	1.93576	0.018
2014-09-17 14:00:00	2.46015	1.07604	0.02
2014-09-17 15:00:00	1.53888	1.50833	0.019
2014-09-17 16:00:00	0.17976	0.759028	0.021
2014-09-17 17:00:00	0.0848198	0.613889	0.026
2014-09-17 18:00:00	-1.95115	0.995833	0.024
2014-09-17 19:00:00	-2.75063	1.37257	0.027
2014-09-17 20:00:00	-3.22473	1.0625	0.03
2014-09-17 21:00:00	-3.48562	2.09896	0.028
2014-09-17 22:00:00	-4.63629	1.61667	0.027
2014-09-17 23:00:00	-4.49916	2.32778	0.03
2014-09-18	-3.03905	1.4684	0.036
2014-09-18 01:00:00	-3.98982	1.73993	0.031
2014-09-18 02:00:00	-5.21223	1.75833	0.03
2014-09-18 03:00:00	-5.48312	1.06528	0.032
2014-09-18 04:00:00	-5.10373	1.28299	0.034
2014-09-18 05:00:00	-4.93224	1.84757	0.032
2014-09-18 06:00:00	-5.84906	1.96181	0.032
2014-09-18 07:00:00	-5.54422	2.17917	0.032
2014-09-18 08:00:00	0.458996	0.773264	0.029
2014-09-18 09:00:00	-0.271462	0.498264	0.021
2014-09-18 10:00:00	-0.169914	1.34688	0.032
2014-09-18 11:00:00	0.467743	1.14861	0.031
2014-09-18 12:00:00	1.04119	1.55313	0.032
2014-09-18 13:00:00	3.17274	1.0875	0.026
2014-09-18 14:00:00	1.47611	1.23576	0.026
2014-09-18 15:00:00	0.661717	1.68021	0.028
2014-09-18 16:00:00	1.13678	0.430208	0.029
2014-09-18 17:00:00	0.763516	0.547569	0.029
2014-09-18 18:00:00	-0.661663	0.330903	0.029
2014-09-18 19:00:00	-0.51651	0.384375	0.034
2014-09-18 20:00:00	-0.814682	0.879514	0.035
2014-09-18 21:00:00	-0.475239	1.30313	0.039
2014-09-18 22:00:00	-0.644958	1.57812	0.038
2014-09-18 23:00:00	-0.441292	0.471181	0.038
2014-09-19	-0.407349	0.268403	0.039
2014-09-19 01:00:00	-0.373406	0.347917	0.039
2014-09-19 02:00:00	-0.0679054	0.954167	0.043
2014-09-19 03:00:00	0.237595	2.67917	0.042
2014-09-19 04:00:00	-0.0339622	3.59167	0.041
2014-09-19 05:00:00	-0.780735	3.44062	0.036
2014-09-19 06:00:00	-0.644958	4.10347	0.037
2014-09-19 07:00:00	-0.509182	3.40069	0.037
2014-09-19 08:00:00	-0.746792	2.93542	0.036
2014-09-19 09:00:00	-1.18807	3.95243	0.04
2014-09-19 10:00:00	-0.0679054	2.70312	0.04
2014-09-19 11:00:00	0.779911	1.56563	0.029
2014-09-19 12:00:00	0.527023	0.892708	0.032
2014-09-19 13:00:00	1.71363	0.825	0.029
2014-09-19 14:00:00	0.661717	0.738194	0.027
2014-09-19 15:00:00	-0.661663	2.06319	0.027
2014-09-19 16:00:00	-1.13672	1.97882	0.027
2014-09-19 17:00:00	-1.53509	1.34132	0.028
2014-09-19 18:00:00	-2.24035	1.09583	0.025
2014-09-19 19:00:00	-2.81739	1.49861	0.022
2014-09-19 20:00:00	-2.9436	2.15556	0.044
2014-09-19 21:00:00	-3.04204	1.68958	0.048
2014-09-19 22:00:00	-3.10964	1.64062	0.054
2014-09-19 23:00:00	-3.82021	1.7316	0.055
2014-09-20	-3.95586	1.36701	0.023
2014-09-20 01:00:00	-3.71817	0.724653	0.042
2014-09-20 02:00:00	-3.6163	0.134375	0.062
2014-09-20 03:00:00	-3.75213	0.203819	0.067
2014-09-20 04:00:00	-3.82004	0.704861	0.08
2014-09-20 05:00:00	-3.82004	0.420486	0.08
2014-09-20 06:00:00	-3.82004	0.164583	0.075
2014-09-20 07:00:00	-3.51444	0.465972	0.039
2014-09-20 08:00:00	-2.1562	0.419444	0.079
2014-09-20 09:00:00	-3.03912	1.20903	0.076
2014-09-20 10:00:00	-0.90456	1.43993	0.075
2014-09-20 11:00:00	-0.475201	0.847917	0.072
2014-09-20 12:00:00	1.48998	1.1316	0.069
2014-09-20 13:00:00	-1.47516	1.73299	0.067
2014-09-20 14:00:00	-1.16201	2.04514	0.069
2014-09-20 15:00:00	-0.21957	0.743055	0.066
2014-09-20 16:00:00	-1.13672	0.544097	0.063
2014-09-20 17:00:00	-1.91718	0.804861	0.064
2014-09-20 18:00:00	-2.98965	1.19757	0.072
2014-09-20 19:00:00	-3.56417	0.903819	0.074
2014-09-20 20:00:00	-4.23179	0.832986	0.078
2014-09-20 21:00:00	-4.63498	1.61111	0.079
2014-09-20 22:00:00	-4.22751	2.04236	0.083
2014-09-20 23:00:00	-4.05773	1.20625	0.085
2014-09-21	-4.4652	0.889583	0.079
2014-09-21 01:00:00	-4.4652	0.569444	0.081
2014-09-21 02:00:00	-4.05658	0.720139	0.086
2014-09-21 03:00:00	-4.02363	0.998958	0.086
2014-09-21 04:00:00	-4.02375	0.971528	0.08
2014-09-21 05:00:00	-3.9898	0.483681	0.087
2014-09-21 06:00:00	-4.46464	0.45	0.085
2014-09-21 07:00:00	-3.58148	0.124653	0.096
2014-09-21 08:00:00	-2.22409	0.0270833	0.089
2014-09-21 09:00:00	-1.8197	0.427083	0.103
2014-09-21 10:00:00	-0.644329	0.545486	0.094
2014-09-21 11:00:00	1.3578	0.500695	0.09
2014-09-21 12:00:00	0.424381	0.621875	0.091
2014-09-21 13:00:00	-0.627731	0.759722	0.092
2014-09-21 14:00:00	-1.03492	1.03125	0.094
2014-09-21 15:00:00	-0.831329	0.996181	0.093
2014-09-21 16:00:00	-2.25651	0.927083	0.093
2014-09-21 17:00:00	-1.60302	0.283681	0.097
2014-09-21 18:00:00	-2.98726	0.579167	0.099
2014-09-21 19:00:00	-2.88448	0.652778	0.106
2014-09-21 20:00:00	-3.24746	1.07674	0.103
2014-09-21 21:00:00	-3.34658	1.53542	0.104
2014-09-21 22:00:00	-4.80476	1.54375	0.094
2014-09-21 23:00:00	-4.53311	1.68299	0.093
2014-09-22	-4.22751	1.40347	0.1
2014-09-22 01:00:00	-3.71817	1.10451	0.105
2014-09-22 02:00:00	-1.95247	4.04965	0.108
2014-09-22 03:00:00	-2.29203	4.92396	0.106
2014-09-22 04:00:00	-2.4618	4.94618	0.105
2014-09-22 05:00:00	-2.63175	2.99063	0.103
2014-09-22 06:00:00	-3.03907	1.61319	0.099
2014-09-22 07:00:00	-2.93719	1.26354	0.1
2014-09-22 08:00:00	-2.32598	1.0375	0.099
2014-09-22 09:00:00	-2.05882	1.85069	0.099
2014-09-22 10:00:00	-1.11095	1.82917	0.096
2014-09-22 11:00:00	-0.780697	1.99896	0.094
2014-09-22 12:00:00	-0.577034	1.97951	0.094
2014-09-22 13:00:00	-0.951294	3.3559	0.094
2014-09-22 14:00:00	-0.848625	2.65451	0.092
2014-09-22 15:00:00	-1.15413	2.07639	0.093
2014-09-22 16:00:00	-2.41006	3.35833	0.092
2014-09-22 17:00:00	-3.05458	2.51944	0.093
2014-09-22 18:00:00	-3.45139	2.69097	0.094
2014-09-22 19:00:00	-4.36334	2.60833	0.094
2014-09-22 20:00:00	-4.12564	2.52917	0.096
2014-09-22 21:00:00	-3.98982	2.51354	0.095
2014-09-22 22:00:00	-4.09169	2.60139	0.096
2014-09-22 23:00:00	-3.48048	2.42743	0.098
2014-09-23	-3.6163	2.4125	0.097
2014-09-23 01:00:00	-3.54839	2.14688	0.098
2014-09-23 02:00:00	-4.22751	1.55035	0.095
2014-09-23 03:00:00	-4.39667	2.1118	0.095
2014-09-23 04:00:00	-4.35882	1.15486	0.094
2014-09-23 05:00:00	-4.66312	1.17292	0.093
2014-09-23 06:00:00	-5.10315	1.74097	0.093
2014-09-23 07:00:00	-4.83038	1.54722	0.094
2014-09-23 08:00:00	-4.21967	1.89236	0.094
2014-09-23 09:00:00	-3.48001	1.94757	0.092
2014-09-23 10:00:00	-3.4465	2.00694	0.088
2014-09-23 11:00:00	-3.17486	2.96979	0.087
2014-09-23 12:00:00	-3.61959	3.40833	0.085
2014-09-23 13:00:00	-1.04081	2.79271	0.081
2014-09-23 14:00:00	-4.75219	2.27326	0.067
2014-09-23 15:00:00	-4.94758	2.30799	0.075
2014-09-23 16:00:00	-6.67248	1.48264	0.073
2014-09-23 17:00:00	-6.26423	2.76389	0.083
2014-09-23 18:00:00	-6.5283	1.2809	0.084
2014-09-23 19:00:00	-7.57977	1.63368	0.085
2014-09-23 20:00:00	-7.16713	1.42535	0.085
2014-09-23 21:00:00	-6.89539	0.593055	0.086
2014-09-23 22:00:00	-7.77854	1.30035	0.084
2014-09-23 23:00:00	-7.37093	0.871181	0.091
2014-09-24	-6.86142	1.93264	0.088
2014-09-24 01:00:00	-6.96332	0.860417	0.089
2014-09-24 02:00:00	-6.55571	1.10799	0.09
2014-09-24 03:00:00	-6.45381	1.05486	0.089
2014-09-24 04:00:00	-6.11414	1.19792	0.091
2014-09-24 05:00:00	-6.01223	0.634722	0.091
2014-09-24 06:00:00	-5.97827	0.901736	0.089
2014-09-24 07:00:00	-5.63859	1.47361	0.09
2014-09-24 08:00:00	-4.99321	1.10625	0.09
2014-09-24 09:00:00	-4.5249	1.42674	0.089
2014-09-24 10:00:00	-4.42298	2.81042	0.085
2014-09-24 11:00:00	-4.08799	2.90035	0.085
2014-09-24 12:00:00	-4.02375	2.37917	0.082
2014-09-24 13:00:00	-4.2954	2.63194	0.079
2014-09-24 14:00:00	-3.9898	2.88333	0.08
2014-09-24 15:00:00	-3.51442	1.43264	0.077
2014-09-24 16:00:00	-3.82306	0.65625	0.076
2014-09-24 17:00:00	-4.90681	1.3	0.078
2014-09-24 18:00:00	-5.11036	1.1743	0.081
2014-09-24 19:00:00	-5.40929	0.930555	0.084
2014-09-24 20:00:00	-5.44233	1.6743	0.084
2014-09-24 21:00:00	-5.74595	2.16181	0.084
2014-09-24 22:00:00	-5.8792	1.27257	0.085
2014-09-24 23:00:00	-5.94431	1.19687	0.087
2014-09-25	-6.01223	1.17118	0.085
2014-09-25 01:00:00	-6.28397	0.700347	0.086
2014-09-25 02:00:00	-6.65762	1.59306	0.081
2014-09-25 03:00:00	-6.96332	1.40417	0.083
2014-09-25 04:00:00	-7.33511	0.686458	0.083
2014-09-25 05:00:00	-6.99192	1.37153	0.084
2014-09-25 06:00:00	-6.78715	1.34444	0.084
2014-09-25 07:00:00	-6.58526	1.11806	0.084
2014-09-25 08:00:00	-6.07944	1.36319	0.085
2014-09-25 09:00:00	-4.65352	0.590625	0.082
2014-09-25 10:00:00	-4.79657	1.69826	0.079
2014-09-25 11:00:00	-4.02172	1.01562	0.073
2014-09-25 12:00:00	-4.63496	1.39236	0.07
2014-09-25 13:00:00	-4.66892	1.70938	0.068
2014-09-25 14:00:00	-3.82002	1.32882	0.07
2014-09-25 15:00:00	-4.36502	0.558681	0.066
2014-09-25 16:00:00	-5.07642	0.783681	0.073
2014-09-25 17:00:00	-5.28014	0.491667	0.075
2014-09-25 18:00:00	-7.48234	0.549653	0.065
2014-09-25 19:00:00	-6.42053	1.03507	0.071
2014-09-25 20:00:00	-7.8125	1.11979	0.073
2014-09-25 21:00:00	-8.1482	1.09028	0.084
2014-09-25 22:00:00	-8.24456	1.6434	0.083
2014-09-25 23:00:00	-7.83345	2.53576	0.081
2014-09-26	-9.12336	1.97396	0.079
2014-09-26 01:00:00	-10.1427	1.20521	0.078
2014-09-26 02:00:00	-10.0068	0.835417	0.086
2014-09-26 03:00:00	-9.83167	1.24479	0.073
2014-09-26 04:00:00	-8.74604	1.66701	0.064
2014-09-26 05:00:00	-7.90008	1.4691	0.081
2014-09-26 06:00:00	-7.15255	0.548264	0.083
2014-09-26 07:00:00	-6.77878	1.25799	0.086
2014-09-26 08:00:00	-6.06522	1.34653	0.08
2014-09-26 09:00:00	-5.57001	0.776042	0.08
2014-09-26 10:00:00	-5.33375	1.29132	0.077
2014-09-26 11:00:00	-5.34045	2.37917	0.077
2014-09-26 12:00:00	-5.0687	3.3559	0.074
2014-09-26 13:00:00	-4.76474	2.39305	0.059
2014-09-26 14:00:00	-6.69903	3.73889	0.071
2014-09-26 15:00:00	-5.67356	3.05347	0.077
2014-09-26 16:00:00	-7.77855	2.97812	0.076
2014-09-26 17:00:00	-8.08411	3.46285	0.077
2014-09-26 18:00:00	-8.00521	3.48299	0.079
2014-09-26 19:00:00	-8.44378	2.66181	0.083
2014-09-26 20:00:00	-8.44378	2.03785	0.083
2014-09-26 21:00:00	-9.0554	2.1875	0.08
2014-09-26 22:00:00	-8.98744	2.33646	0.081
2014-09-26 23:00:00	-9.39519	3.24444	0.078
2014-09-27	-9.83692	2.34306	0.077
2014-09-27 01:00:00	-10.1037	2.47604	0.072
2014-09-27 02:00:00	-9.21836	2.1191	0.081
2014-09-27 03:00:00	-9.04929	2.03229	0.076
2014-09-27 04:00:00	-9.45714	1.62882	0.083
2014-09-27 05:00:00	-9.1164	1.80729	0.081
2014-09-27 06:00:00	-9.04843	1.96632	0.087
2014-09-27 07:00:00	-9.11644	2.44236	0.086
2014-09-27 08:00:00	-9.15039	3.00625	0.085
2014-09-27 09:00:00	-8.64062	3.58125	0.093
2014-09-27 10:00:00	-8.03435	3.01146	0.09
2014-09-27 11:00:00	-6.60889	2.50069	0.097
2014-09-27 12:00:00	-5.16289	1.14271	0.084
2014-09-27 13:00:00	-5.40831	1.39861	0.081
2014-09-27 14:00:00	-4.89972	1.67986	0.08
2014-09-27 15:00:00	-5.06902	1.11875	0.082
2014-09-27 16:00:00	-5.95303	1.16667	0.082
2014-09-27 17:00:00	-5.81457	1.33333	0.089
2014-09-27 18:00:00	-6.6916	0.682639	0.084
2014-09-27 19:00:00	-7.09919	0.754861	0.089
2014-09-27 20:00:00	-6.41755	1.14583	0.089
2014-09-27 21:00:00	-6.58482	0.949653	0.091
2014-09-27 22:00:00	-5.39535	0.764236	0.096
2014-09-27 23:00:00	-4.58554	1.62813	0.096
2014-09-28	-4.44972	1.84583	0.093
2014-09-28 01:00:00	-4.99319	2.44826	0.09
2014-09-28 02:00:00	-4.95924	3.17708	0.091
2014-09-28 03:00:00	-5.43479	2.80313	0.089
2014-09-28 04:00:00	-5.67256	2.31736	0.089
2014-09-28 05:00:00	-5.60463	2.51493	0.089
2014-09-28 06:00:00	-5.50272	2.94201	0.091
2014-09-28 07:00:00	-5.57066	3.79306	0.084
2014-09-28 08:00:00	-5.70653	4.66111	0.083
2014-09-28 09:00:00	-5.29892	3.99479	0.086
2014-09-28 10:00:00	-4.72274	3.4934	0.084
2014-09-28 11:00:00	-4.45729	2.03611	0.083
2014-09-28 12:00:00	-3.51128	2.46076	0.081
2014-09-28 13:00:00	-4.15935	3.57014	0.082
2014-09-28 14:00:00	-4.12138	4.88125	0.084
2014-09-28 15:00:00	-4.08594	5.16146	0.085
2014-09-28 16:00:00	-4.32536	5.80972	0.082
2014-09-28 17:00:00	-6.32458	2.98438	0.088
2014-09-28 18:00:00	-5.50988	3.51944	0.091
2014-09-28 19:00:00	-7.00322	3.15104	0.088
2014-09-28 20:00:00	-9.98642	2.51597	0.075
2014-09-28 21:00:00	-10.4829	2.71528	0.083
2014-09-28 22:00:00	-9.2253	3.57153	0.094
2014-09-28 23:00:00	-7.90012	1.41076	0.087
2014-09-29	-8.95346	1.82708	0.089
2014-09-29 01:00:00	-8.07001	1.96597	0.086
2014-09-29 02:00:00	-9.12336	2.61701	0.085
2014-09-29 03:00:00	-10.1427	2.42674	0.079
2014-09-29 04:00:00	-8.91949	2.01181	0.109
2014-09-29 05:00:00	-10.1765	1.89757	0.105
2014-09-29 06:00:00	-13.5345	2.23993	0.079
2014-09-29 07:00:00	-11.0135	2.22326	0.09
2014-09-29 08:00:00	-9.55132	3.65	0.095
2014-09-29 09:00:00	-10.0668	1.27465	0.109
2014-09-29 10:00:00	-7.9969	1.34097	0.083
2014-09-29 11:00:00	-6.2691	2.34861	0.077
2014-09-29 12:00:00	-5.6708	1.83299	0.105
2014-09-29 13:00:00	-5.78119	2.16667	0.091
2014-09-29 14:00:00	-4.56137	1.14305	0.087
2014-09-29 15:00:00	-6.97283	1.00243	0.109
2014-09-29 16:00:00	-6.1213	1.26979	0.086
2014-09-29 17:00:00	-8.6652	1.87986	0.084
2014-09-29 18:00:00	-7.7054	1.73785	0.092
2014-09-29 19:00:00	-10.0408	1.34444	0.068
2014-09-29 20:00:00	-9.53111	1.12396	0.097
2014-09-29 21:00:00	-9.05528	1.58507	0.103
2014-09-29 22:00:00	-8.64762	2.77917	0.105
2014-09-29 23:00:00	-8.54569	3.88854	0.097
2014-09-30	-11.332	2.62535	0.087
2014-09-30 01:00:00	-10.1767	3.31944	0.082
2014-09-30 02:00:00	-9.8341	2.15313	0.089
2014-09-30 03:00:00	-9.66042	1.76771	0.085
2014-09-30 04:00:00	-8.87851	2.22153	0.098
2014-09-30 05:00:00	-7.76401	3.49167	0.096
2014-09-30 06:00:00	-9.73495	2.09444	0.092
2014-09-30 07:00:00	-10.2786	2.25972	0.094
2014-09-30 08:00:00	-8.64756	2.32569	0.095
2014-09-30 09:00:00	-8.91945	1.72292	0.092
2014-09-30 10:00:00	-6.23512	2.46181	0.1
2014-09-30 11:00:00	-2.34091	3.81181	0.098
2014-09-30 12:00:00	-2.72526	3.12222	0.09
2014-09-30 13:00:00	-2.12207	1.25208	0.083
2014-09-30 14:00:00	-1.22782	0.581597	0.061
2014-09-30 15:00:00	3.17277	0.594444	0.066
2014-09-30 16:00:00	-4.46214	0.834375	0.067
2014-09-30 17:00:00	-7.73246	1.83924	0.074
2014-09-30 18:00:00	-10.1273	2.97951	0.08
2014-09-30 19:00:00	-11.1969	3.65937	0.086
2014-09-30 20:00:00	-11.8417	2.49757	0.089
2014-09-30 21:00:00	-11.5975	1.8309	0.095
2014-09-30 22:00:00	-11.4274	2.75035	0.094
2014-09-30 23:00:00	-11.8346	3.39375	0.096
2014-10-01	-11.8629	2.81285	0.091
2014-10-01 01:00:00	-11.3868	2.88056	0.1
2014-10-01 02:00:00	-11.6247	3.63125	0.1
2014-10-01 03:00:00	-11.6927	3.31528	0.096
2014-10-01 04:00:00	-10.0272	1.69896	0.106
2014-10-01 05:00:00	-9.9932	2.24201	0.102
2014-10-01 06:00:00	-10.4691	2.4066	0.101
2014-10-01 07:00:00	-11.0469	2.10833	0.096
2014-10-01 08:00:00	-10.4691	2.18819	0.1
2014-10-01 09:00:00	-10.0965	2.46181	0.094
2014-10-01 10:00:00	-10.5054	4.20833	0.096
2014-10-01 11:00:00	-7.38289	3.16632	0.094
2014-10-01 12:00:00	-7.01663	2.19236	0.091
2014-10-01 13:00:00	-7.60176	3.57535	0.085
2014-10-01 14:00:00	-6.77893	4.12014	0.091
2014-10-01 15:00:00	-7.73787	2.84896	0.085
2014-10-01 16:00:00	-10.1088	4.26701	0.083
2014-10-01 17:00:00	-10.4109	3.96354	0.09
2014-10-01 18:00:00	-9.15039	3.59236	0.102
2014-10-01 19:00:00	-8.43671	2.16736	0.104
2014-10-01 20:00:00	-8.02998	1.27257	0.105
2014-10-01 21:00:00	-8.37299	1.23125	0.102
2014-10-01 22:00:00	-8.20399	1.51632	0.077
2014-10-01 23:00:00	-8.06973	1.99514	0.11
2014-10-02	-8.13794	1.75451	0.104
2014-10-02 01:00:00	-7.96804	1.3309	0.096
2014-10-02 02:00:00	-8.40977	1.71979	0.104
2014-10-02 03:00:00	-9.32063	1.69236	0.1
2014-10-02 04:00:00	-10.2719	2.15069	0.088
2014-10-02 05:00:00	-11.3224	2.75625	0.095
2014-10-02 06:00:00	-12.5425	2.61632	0.084
2014-10-02 07:00:00	-12.4745	2.77917	0.097
2014-10-02 08:00:00	-10.4011	2.69618	0.086
2014-10-02 09:00:00	-9.44935	2.78299	0.094
2014-10-02 10:00:00	-8.94627	2.53472	0.086
2014-10-02 11:00:00	-8.67775	3.78958	0.087
2014-10-02 12:00:00	-7.76298	4.22778	0.08
2014-10-02 13:00:00	-6.71082	3.07847	0.071
2014-10-02 14:00:00	-6.27305	3.17535	0.075
2014-10-02 15:00:00	-6.28358	2.92743	0.078
2014-10-02 16:00:00	-7.33695	2.46181	0.081
2014-10-02 17:00:00	-8.1745	2.52986	0.081
2014-10-02 18:00:00	-10.3466	1.84861	0.091
2014-10-02 19:00:00	-10.0376	1.70555	0.091
2014-10-02 20:00:00	-11.0196	1.16458	0.081
2014-10-02 21:00:00	-11.4941	1.325	0.099
2014-10-02 22:00:00	-9.85914	1.91597	0.093
2014-10-02 23:00:00	-9.62523	3.18021	0.108
2014-10-03	-8.3006	2.65729	0.1
2014-10-03 01:00:00	-9.04842	2.70486	0.105
2014-10-03 02:00:00	-10.2719	3.34514	0.109
2014-10-03 03:00:00	-10.2363	2.90486	0.095
2014-10-03 04:00:00	-10.1639	2.28542	0.107
2014-10-03 05:00:00	-10.3672	3.92083	0.101
2014-10-03 06:00:00	-10.571	3.61632	0.099
2014-10-03 07:00:00	-10.741	3.04896	0.111
2014-10-03 08:00:00	-10.3331	2.95	0.106
2014-10-03 09:00:00	-9.48334	3.63472	0.099
2014-10-03 10:00:00	-6.94095	2.97535	0.107
2014-10-03 11:00:00	-6.84674	1.45938	0.101
2014-10-03 12:00:00	-5.70481	1.32292	0.096
2014-10-03 13:00:00	-4.52411	1.11632	0.097
2014-10-03 14:00:00	-5.23853	1.75903	0.095
2014-10-03 15:00:00	-5.23832	2	0.096
2014-10-03 16:00:00	-5.67466	1.98889	0.097
2014-10-03 17:00:00	-6.11414	2.28715	0.098
2014-10-03 18:00:00	-6.61953	2.24931	0.1
2014-10-03 19:00:00	-6.85322	1.84514	0.099
2014-10-03 20:00:00	-6.9153	2.35833	0.102
2014-10-03 21:00:00	-7.18656	2.49201	0.103
2014-10-03 22:00:00	-7.45839	2.84514	0.104
2014-10-03 23:00:00	-7.35646	1.78958	0.101
2014-10-04	-7.35646	1.92396	0.101
2014-10-04 01:00:00	-7.69624	2.07014	0.098
2014-10-04 02:00:00	-7.62828	2.64305	0.099
2014-10-04 03:00:00	-7.66227	2.80069	0.1
2014-10-04 04:00:00	-7.7642	1.45868	0.1
2014-10-04 05:00:00	-7.22054	2.40868	0.106
2014-10-04 06:00:00	-7.73022	2.44931	0.102
2014-10-04 07:00:00	-7.96807	3.7368	0.106
2014-10-04 08:00:00	-7.86614	3.6875	0.115
2014-10-04 09:00:00	-7.42441	3.30694	0.117
2014-10-04 10:00:00	-6.94871	3.21632	0.108
2014-10-04 11:00:00	-6.64832	2.83264	0.101
2014-10-04 12:00:00	-6.6506	2.67361	0.098
2014-10-04 13:00:00	-6.24916	3.05208	0.098
2014-10-04 14:00:00	-5.26493	1.62639	0.097
2014-10-04 15:00:00	-6.42244	2.0684	0.094
2014-10-04 16:00:00	-6.55571	1.85799	0.096
2014-10-04 17:00:00	-6.65762	1.65069	0.099
2014-10-04 18:00:00	-6.85519	1.39618	0.099
2014-10-04 19:00:00	-6.95314	1.50972	0.099
2014-10-04 20:00:00	-6.95222	0.935764	0.099
2014-10-04 21:00:00	-7.32259	1.86146	0.098
2014-10-04 22:00:00	-7.62828	3.39583	0.097
2014-10-04 23:00:00	-7.35646	3.02882	0.099
2014-10-05	-7.96807	3.28924	0.094
2014-10-05 01:00:00	-8.51174	4.04653	0.096
2014-10-05 02:00:00	-8.54571	3.71563	0.096
2014-10-05 03:00:00	-8.23991	3.55069	0.098
2014-10-05 04:00:00	-8.13797	3.47118	0.097
2014-10-05 05:00:00	-8.37582	3.23333	0.097
2014-10-05 06:00:00	-8.30786	3.27535	0.099
2014-10-05 07:00:00	-8.17195	3.05208	0.098
2014-10-05 08:00:00	-8.00206	3.30104	0.098
2014-10-05 09:00:00	-7.69624	2.70625	0.097
2014-10-05 10:00:00	-7.18656	2.26389	0.097
2014-10-05 11:00:00	-7.05064	2.39549	0.096
2014-10-05 12:00:00	-6.41359	2.16354	0.094
2014-10-05 13:00:00	-6.6576	2.86979	0.093
2014-10-05 14:00:00	-6.69156	2.61319	0.093
2014-10-05 15:00:00	-7.03124	2.57708	0.093
2014-10-05 16:00:00	-7.9077	3.3184	0.092
2014-10-05 17:00:00	-8.71563	2.62361	0.091
2014-10-05 18:00:00	-10.0068	1.47361	0.09
2014-10-05 19:00:00	-10.7538	1.88715	0.088
2014-10-05 20:00:00	-12.9227	2.04792	0.088
2014-10-05 21:00:00	-12.2707	2.82083	0.087
2014-10-05 22:00:00	-11.6927	2.60069	0.09
2014-10-05 23:00:00	-11.9307	3.02257	0.093
2014-10-06	-12.6105	2.53854	0.091
2014-10-06 01:00:00	-11.861	1.53021	0.096
2014-10-06 02:00:00	-10.8752	2.17708	0.097
2014-10-06 03:00:00	-11.0809	2.05903	0.097
2014-10-06 04:00:00	-11.3528	2.49167	0.094
2014-10-06 05:00:00	-11.7947	1.73021	0.099
2014-10-06 06:00:00	-10.1291	3.31285	0.099
2014-10-06 07:00:00	-12.8484	1.45035	0.099
2014-10-06 08:00:00	-11.3528	1.44201	0.094
2014-10-06 09:00:00	-10.0952	0.590972	0.089
2014-10-06 10:00:00	-8.81002	0.886806	0.098
2014-10-06 11:00:00	-5.99721	1.84965	0.095
2014-10-06 12:00:00	-6.92766	1.11424	0.073
2014-10-06 13:00:00	-4.65968	1.49896	0.083
2014-10-06 14:00:00	-5.16991	2.80313	0.09
2014-10-06 15:00:00	-5.84859	2.76146	0.083
2014-10-06 16:00:00	-7.67664	3.13646	0.083
2014-10-06 17:00:00	-10.6187	2.61563	0.075
2014-10-06 18:00:00	-9.49713	2.08993	0.096
2014-10-06 19:00:00	-9.5957	3.41944	0.09
2014-10-06 20:00:00	-9.42226	4.01493	0.099
2014-10-06 21:00:00	-9.89805	2.77951	0.093
2014-10-06 22:00:00	-8.98044	1.78542	0.099
2014-10-06 23:00:00	-9.99999	2.45521	0.102
2014-10-07	-9.0824	2.30903	0.097
2014-10-07 01:00:00	-9.58978	1.13507	0.099
2014-10-07 02:00:00	-9.76093	3.37188	0.096
2014-10-07 03:00:00	-14.6197	1.52014	0.081
2014-10-07 04:00:00	-13.9361	0.731597	0.102
2014-10-07 05:00:00	-8.8031	2.46319	0.105
2014-10-07 06:00:00	-9.85722	2.81736	0.096
2014-10-07 07:00:00	-9.61929	3.58958	0.1
2014-10-07 08:00:00	-9.24539	3.48264	0.099
2014-10-07 09:00:00	-9.51739	2.86528	0.101
2014-10-07 10:00:00	-8.87843	3.08472	0.093
2014-10-07 11:00:00	-7.79759	3.8875	0.097
2014-10-07 12:00:00	-8.88547	1.82118	0.091
2014-10-07 13:00:00	-7.0201	2.03333	0.098
2014-10-07 14:00:00	-7.06179	2.30972	0.089
2014-10-07 15:00:00	-6.24934	2.83681	0.088
2014-10-07 16:00:00	-8.41017	3.93333	0.092
2014-10-07 17:00:00	-10.0408	1.62708	0.095
2014-10-07 18:00:00	-10.272	2.45764	0.095
2014-10-07 19:00:00	-8.91249	3.26042	0.102
2014-10-07 20:00:00	-8.94648	2.43715	0.097
2014-10-07 21:00:00	-9.86396	1.94826	0.098
2014-10-07 22:00:00	-9.72811	2.72674	0.097
2014-10-07 23:00:00	-10.2348	2.90903	0.101
2014-10-08	-8.94599	2.17813	0.1
2014-10-08 01:00:00	-9.32029	2.2059	0.098
2014-10-08 02:00:00	-10.034	2.49306	0.098
2014-10-08 03:00:00	-9.35428	2.68889	0.096
2014-10-08 04:00:00	-8.60661	2.16007	0.105
2014-10-08 05:00:00	-8.02887	1.78854	0.105
2014-10-08 06:00:00	-8.33474	3.11146	0.103
2014-10-08 07:00:00	-8.36872	1.63472	0.106
2014-10-08 08:00:00	-7.62232	1.72326	0.098
2014-10-08 09:00:00	-5.14778	1.89931	0.108
2014-10-08 10:00:00	-4.92301	2.19514	0.095
2014-10-08 11:00:00	-4.31384	3.81111	0.093
2014-10-08 12:00:00	-3.60536	3.44132	0.089
2014-10-08 13:00:00	-2.7979	2.68542	0.09
2014-10-08 14:00:00	-3.04373	1.82604	0.076
2014-10-08 15:00:00	-5.01304	2.29201	0.08
2014-10-08 16:00:00	-7.9287	1.9375	0.075
2014-10-08 17:00:00	-7.88063	2.96319	0.09
2014-10-08 18:00:00	-7.39284	1.82083	0.073
2014-10-08 19:00:00	-9.66702	1.35972	0.091
2014-10-08 20:00:00	-8.64766	1.58715	0.099
2014-10-08 21:00:00	-9.52765	1.70625	0.095
2014-10-08 22:00:00	-9.08419	2.14514	0.094
2014-10-08 23:00:00	-9.79984	2.22569	0.101
2014-10-09	-9.3611	2.7434	0.104
2014-10-09 01:00:00	-9.87078	1.20938	0.095
2014-10-09 02:00:00	-8.34068	1.99792	0.096
2014-10-09 03:00:00	-8.3401	2.84132	0.1
2014-10-09 04:00:00	-7.96683	2.26805	0.1
2014-10-09 05:00:00	-11.3263	1.26875	0.093
2014-10-09 06:00:00	-9.62617	0.942708	0.099
2014-10-09 07:00:00	-7.38318	2.15139	0.102
2014-10-09 08:00:00	-7.58895	2.72917	0.102
2014-10-09 09:00:00	-6.74376	3.31424	0.102
2014-10-09 10:00:00	-5.31768	2.21424	0.1
2014-10-09 11:00:00	-6.01205	1.86736	0.089
2014-10-09 12:00:00	-5.61082	1.79896	0.075
2014-10-09 13:00:00	-4.19351	1.6684	0.085
2014-10-09 14:00:00	-4.29619	0.892014	0.075
2014-10-09 15:00:00	-5.24623	3.36285	0.085
2014-10-09 16:00:00	-6.97095	0.933681	0.09
2014-10-09 17:00:00	-7.30309	3.30174	0.092
2014-10-09 18:00:00	-7.19466	2.69861	0.093
2014-10-09 19:00:00	-10.5847	2.55451	0.087
2014-10-09 20:00:00	-8.23991	2.52083	0.094
2014-10-09 21:00:00	-7.42441	1.09583	0.099
2014-10-09 22:00:00	-7.83216	1.56563	0.098
2014-10-09 23:00:00	-7.1186	1.89931	0.102
2014-10-10	-6.60892	2.37326	0.102
2014-10-10 01:00:00	-6.98269	2.32708	0.099
2014-10-10 02:00:00	-7.42441	2.69687	0.098
2014-10-10 03:00:00	-7.96807	2.58819	0.096
2014-10-10 04:00:00	-8.10399	2.46007	0.097
2014-10-10 05:00:00	-8.71561	2.20451	0.096
2014-10-10 06:00:00	-8.17195	3.15521	0.099
2014-10-10 07:00:00	-9.83692	3.24618	0.092
2014-10-10 08:00:00	-11.0893	2.92222	0.088
2014-10-10 09:00:00	-11.8692	3.3441	0.087
2014-10-10 10:00:00	-8.57196	2.92535	0.098
2014-10-10 11:00:00	-7.28799	2.62569	0.095
2014-10-10 12:00:00	-6.84674	2.75729	0.092
2014-10-10 13:00:00	-6.44682	2.8809	0.093
2014-10-10 14:00:00	-7.57467	2.57396	0.094
2014-10-10 15:00:00	-9.40271	2.55625	0.087
2014-10-10 16:00:00	-7.73022	2.19062	0.099
2014-10-10 17:00:00	-8.10399	2.68924	0.101
2014-10-10 18:00:00	-5.86138	1.02326	0.112
2014-10-10 19:00:00	-6.50772	2.20729	0.103
2014-10-10 20:00:00	-5.58955	1.85833	0.107
2014-10-10 21:00:00	-6.37109	1.8184	0.105
2014-10-10 22:00:00	-6.09924	2.43299	0.108
2014-10-10 23:00:00	-5.83195	1.29062	0.106
2014-10-11	-6.92059	1.71181	0.102
2014-10-11 01:00:00	-5.56186	2.13715	0.105
2014-10-11 02:00:00	-6.95725	1.64097	0.098
2014-10-11 03:00:00	-4.54258	1.54653	0.113
2014-10-11 04:00:00	-5.02708	1.86528	0.106
2014-10-11 05:00:00	-3.46466	1.75694	0.112
2014-10-11 06:00:00	-2.52087	1.11701	0.107
2014-10-11 07:00:00	-2.52069	1.03229	0.105
2014-10-11 08:00:00	-3.57426	1.34653	0.104
2014-10-11 09:00:00	-3.50637	1.13889	0.105
2014-10-11 10:00:00	-2.69275	1.10729	0.103
2014-10-11 11:00:00	-3.5144	0.899305	0.096
2014-10-11 12:00:00	-2.19014	1.18437	0.102
2014-10-11 13:00:00	-1.58042	0.995833	0.098
2014-10-11 14:00:00	0.657059	1.46354	0.1
2014-10-11 15:00:00	-2.00266	1.53264	0.094
2014-10-11 16:00:00	-2.63802	0.752431	0.098
2014-10-11 17:00:00	-1.17152	1.90972	0.107
2014-10-11 18:00:00	-1.10357	2.35	0.107
2014-10-11 19:00:00	-3.17488	1.38333	0.099
2014-10-11 20:00:00	-3.51444	1.9309	0.104
2014-10-11 21:00:00	-4.96972	0.996181	0.099
2014-10-11 22:00:00	-3.98122	1.43125	0.114
2014-10-11 23:00:00	-6.93645	1.47361	0.103
2014-10-12	-5.44167	1.10694	0.093
2014-10-12 01:00:00	-4.11166	1.37917	0.108
2014-10-12 02:00:00	-2.62321	2.09722	0.114
2014-10-12 03:00:00	-4.53086	3.01285	0.098
2014-10-12 04:00:00	-4.7339	2.61424	0.095
2014-10-12 05:00:00	-1.26691	1.87882	0.111
2014-10-12 06:00:00	-1.57893	2.23264	0.095
2014-10-12 07:00:00	-2.42783	1.11632	0.106
2014-10-12 08:00:00	-1.64684	1.5	0.109
2014-10-12 09:00:00	-2.22409	1.32153	0.103
2014-10-12 10:00:00	-1.3752	1.41771	0.106
2014-10-12 11:00:00	-0.496162	1.09306	0.103
2014-10-12 12:00:00	-2.54514	1.37292	0.093
2014-10-12 13:00:00	-2.53546	1.16597	0.098
2014-10-12 14:00:00	-0.665394	2.58125	0.105
2014-10-12 15:00:00	-0.948303	3.25312	0.101
2014-10-12 16:00:00	-0.98423	4.43229	0.1
2014-10-12 17:00:00	-1.72247	2.03785	0.103
2014-10-12 18:00:00	-2.22777	4.04132	0.104
2014-10-12 19:00:00	-2.36044	4.19444	0.101
2014-10-12 20:00:00	-2.32663	4.23472	0.096
2014-10-12 21:00:00	-6.12904	2.54062	0.096
2014-10-12 22:00:00	-3.98931	3.29375	0.105
2014-10-12 23:00:00	-2.66552	4.65417	0.105
2014-10-13	-4.19353	1.74618	0.096
2014-10-13 01:00:00	-5.95744	1.41389	0.095
2014-10-13 02:00:00	-9.10945	1.85938	0.081
2014-10-13 03:00:00	-8.15226	1.91597	0.08
2014-10-13 04:00:00	-9.1712	1.83646	0.097
2014-10-13 05:00:00	-6.11289	1.85278	0.101
2014-10-13 06:00:00	-4.58558	1.90938	0.108
2014-10-13 07:00:00	-5.36683	0.909028	0.104
2014-10-13 08:00:00	-3.12674	1.13715	0.107
2014-10-13 09:00:00	-2.79282	1.03646	0.109
2014-10-13 10:00:00	-2.32555	2.27986	0.106
2014-10-13 11:00:00	-4.43123	2.12465	0.097
2014-10-13 12:00:00	-4.90661	1.80903	0.095
2014-10-13 13:00:00	-2.12223	1.97049	0.092
2014-10-13 14:00:00	-4.36331	2.99757	0.089
2014-10-13 15:00:00	-5.98857	4.05139	0.094
2014-10-13 16:00:00	-7.37453	3.67743	0.095
2014-10-13 17:00:00	-10.7337	1.82882	0.077
2014-10-13 18:00:00	-7.26245	3.91215	0.096
2014-10-13 19:00:00	-7.90309	2.41111	0.101
2014-10-13 20:00:00	-6.23536	1.57014	0.106
2014-10-13 21:00:00	-6.64897	4.29201	0.1
2014-10-13 22:00:00	-7.32975	3.22604	0.099
2014-10-13 23:00:00	-7.56072	1.95243	0.101
2014-10-14	-9.53111	1.56076	0.103
2014-10-14 01:00:00	-7.83216	2.28993	0.108
2014-10-14 02:00:00	-7.86614	1.45139	0.104
2014-10-14 03:00:00	-8.98744	1.66806	0.098
2014-10-14 04:00:00	-6.57494	0.5125	0.103
2014-10-14 05:00:00	-6.23951	1.14618	0.101
2014-10-14 06:00:00	-6.0715	1.32118	0.108
2014-10-14 07:00:00	-5.63539	1.88194	0.104
2014-10-14 08:00:00	-7.5694	0.590972	0.104
2014-10-14 09:00:00	-9.22763	0.401389	0.101
2014-10-14 10:00:00	-4.70745	1.80729	0.11
2014-10-14 11:00:00	-5.0271	2.89722	0.104
2014-10-14 12:00:00	-4.31384	2.32292	0.106
2014-10-14 13:00:00	-3.67613	2.72465	0.106
2014-10-14 14:00:00	-3.70964	2.51597	0.107
2014-10-14 15:00:00	-3.71025	2.67882	0.105
2014-10-14 16:00:00	-3.8122	2.5691	0.106
2014-10-14 17:00:00	-3.94728	2.85347	0.103
2014-10-14 18:00:00	-4.7631	3.31215	0.104
2014-10-14 19:00:00	-5.77525	4.3941	0.1
2014-10-14 20:00:00	-4.3818	3.85139	0.104
2014-10-14 21:00:00	-6.62365	3.19618	0.102
2014-10-14 22:00:00	-4.61957	3.24826	0.107
2014-10-14 23:00:00	-4.07704	3.01181	0.107
2014-10-15	-5.43746	2.4191	0.103
2014-10-15 01:00:00	-3.70498	1.81319	0.108
2014-10-15 02:00:00	-4.32119	1.63507	0.105
2014-10-15 03:00:00	-3.57402	0.76875	0.105
2014-10-15 04:00:00	-5.30649	1.03021	0.1
2014-10-15 05:00:00	-3.6054	1.38264	0.111
2014-10-15 06:00:00	-4.72914	0.953125	0.108
2014-10-15 07:00:00	-4.99923	0.589931	0.102
2014-10-15 08:00:00	-4.38938	1.36597	0.105
2014-10-15 09:00:00	-2.82594	2.05903	0.109
2014-10-15 10:00:00	-2.7626	1.7309	0.108
2014-10-15 11:00:00	-1.47707	2.84549	0.108
2014-10-15 12:00:00	-1.10355	1.87813	0.106
2014-10-15 13:00:00	-0.837883	0.907639	0.105
2014-10-15 14:00:00	-1.92825	1.3434	0.094
2014-10-15 15:00:00	-1.07805	1.54618	0.1
2014-10-15 16:00:00	-1.99074	2.64722	0.103
2014-10-15 17:00:00	-3.82004	2.49792	0.098
2014-10-15 18:00:00	-3.51444	2.4434	0.105
2014-10-15 19:00:00	-5.00849	2.74028	0.099
2014-10-15 20:00:00	-5.57783	4.75521	0.096
2014-10-15 21:00:00	-5.81506	3.92153	0.098
2014-10-15 22:00:00	-5.84271	4.76007	0.099
2014-10-15 23:00:00	-6.69158	4.18576	0.095
2014-10-16	-6.35191	4.26493	0.098
2014-10-16 01:00:00	-7.20109	2.46215	0.091
2014-10-16 02:00:00	-8.35196	3.07639	0.106
2014-10-16 03:00:00	-7.90968	2.14028	0.087
2014-10-16 04:00:00	-6.54994	3.29375	0.098
2014-10-16 05:00:00	-5.05704	2.60764	0.113
2014-10-16 06:00:00	-6.08015	2.35312	0.091
2014-10-16 07:00:00	-6.5526	1.6118	0.102
2014-10-16 08:00:00	-6.07918	1.94444	0.1
2014-10-16 09:00:00	-8.38443	0.975347	0.104
2014-10-16 10:00:00	-10.7244	0.835764	0.072
2014-10-16 11:00:00	-5.92934	1.14097	0.097
2014-10-16 12:00:00	-4.78873	1.00382	0.092
2014-10-16 13:00:00	-5.00044	2.18264	0.093
2014-10-16 14:00:00	-5.71384	2.34063	0.088
2014-10-16 15:00:00	-5.78193	1.74653	0.087
2014-10-16 16:00:00	-8.66185	3.35868	0.09
2014-10-16 17:00:00	-8.68244	4.41875	0.101
2014-10-16 18:00:00	-9.53111	3.575	0.091
2014-10-16 19:00:00	-8.37582	3.62431	0.099
2014-10-16 20:00:00	-10.5165	3.06354	0.092
2014-10-16 21:00:00	-9.73425	2.21111	0.095
2014-10-16 22:00:00	-10.1367	3.89444	0.092
2014-10-16 23:00:00	-9.66016	3.44757	0.106
2014-10-17	-9.49023	3.26389	0.099
2014-10-17 01:00:00	-9.96602	2.73229	0.102
2014-10-17 02:00:00	-8.47069	2.50347	0.104
2014-10-17 03:00:00	-9.32031	1.2691	0.099
2014-10-17 04:00:00	-10.7137	1.31181	0.096
2014-10-17 05:00:00	-8.98047	1.98368	0.107
2014-10-17 06:00:00	-8.2328	1.7625	0.104
2014-10-17 07:00:00	-9.18713	2.04514	0.101
2014-10-17 08:00:00	-8.60737	1.39792	0.104
2014-10-17 09:00:00	-8.03561	1.29722	0.101
2014-10-17 10:00:00	-10.0721	1.53264	0.098
2014-10-17 11:00:00	-9.42227	2.99549	0.096
2014-10-17 12:00:00	-8.7141	1.92951	0.091
2014-10-17 13:00:00	-9.42914	2.92465	0.097
2014-10-17 14:00:00	-8.23988	2.59097	0.088
2014-10-17 15:00:00	-10.6184	3.07674	0.095
[truncated: 6,265 more rows]

## Sheet: Thermal conductivity2013-2014
	2013-2014 season				2013-2014 season
	Thermal conductivity				Thermal conductivity
	Snow				Soil
date	7 cm			date	-10 cm
2013-09-02				2013-07-12	0.686033
2013-09-04				2013-07-14	0.681628
2013-09-06				2013-07-16	0.700266
2013-09-08				2013-07-18	0.680094
2013-09-10				2013-07-20	0.696302
2013-09-12				2013-07-22	0.711206
2013-09-14				2013-07-24	0.727749
2013-09-16				2013-07-26	0.767115
2013-09-18				2013-07-28	1.67605
2013-09-20				2013-07-30	2.55385
2013-09-22				2013-08-01
2013-09-24				2013-08-03	0.694034
2013-09-26				2013-08-05	0.694582
2013-09-28				2013-08-07	0.72313
2013-09-30				2013-08-09	0.826658
2013-10-02				2013-08-11	0.728446
2013-10-04				2013-08-13	0.678132
2013-10-06				2013-08-15	0.670691
2013-10-08				2013-08-17	0.723991
2013-10-10				2013-08-19	0.733641
2013-10-12				2013-08-21	0.713402
2013-10-14				2013-08-23	0.725925
2013-10-16	0.0391244			2013-08-25	0.717616
2013-10-18	0.0275766			2013-08-27	0.714516
2013-10-20				2013-08-29	0.732515
2013-10-22				2013-08-31	0.731772
2013-10-24	0.0357324			2013-09-02	0.692847
2013-10-26	0.0248539			2013-09-04	0.694119
2013-10-28	0.0298543			2013-09-06	0.735699
2013-10-30	0.0324522			2013-09-08	0.740504
2013-11-01	0.0382374			2013-09-10	0.718697
2013-11-03	0.0375942			2013-09-12	0.712138
2013-11-05	0.0465143			2013-09-14	0.744628
2013-11-07	0.0502847			2013-09-16	0.709402
2013-11-09	0.0941995			2013-09-18	0.6874
2013-11-11	0.0934304			2013-09-20	0.723886
2013-11-13	0.100936			2013-09-22	1.01832
2013-11-15	0.0831088			2013-09-24
2013-11-17	0.101384			2013-09-26	1.68339
2013-11-19	0.129957			2013-09-28
2013-11-21	0.175754			2013-09-30
2013-11-23	0.0766042			2013-10-02	1.36826
2013-11-25	0.0813505			2013-10-04	1.55857
2013-11-27	0.0841758			2013-10-06	1.56107
2013-11-29	0.0840365			2013-10-08	1.69133
2013-12-01				2013-10-10	1.54598
2013-12-03	0.15557			2013-10-12
2013-12-05	0.192109			2013-10-14	1.83288
2013-12-07	0.2062			2013-10-16	1.66453
2013-12-09	0.217712			2013-10-18	1.63895
2013-12-11	0.21569			2013-10-20	1.54594
2013-12-13	0.238551			2013-10-22	1.73508
2013-12-15	0.216411			2013-10-24	1.85141
2013-12-17	0.200587			2013-10-26	1.47999
2013-12-19	0.224869			2013-10-28
2013-12-21	0.221866			2013-10-30
2013-12-23	0.186521			2013-11-01
2013-12-25	0.221057			2013-11-03
2013-12-27	0.226448			2013-11-05
2013-12-29	0.28571			2013-11-07
2013-12-31	0.219906			2013-11-09	1.85092
2014-01-01	0.215111			2013-11-11	1.99871
2014-01-03	0.212961			2013-11-13	1.83152
2014-01-05	0.219792			2013-11-15	1.85791
2014-01-07	0.220992			2013-11-17
2014-01-09	0.221575			2013-11-19
2014-01-11	0.279225			2013-11-21	1.97695
2014-01-13	0.270507			2013-11-23
2014-01-15	0.229141			2013-11-25	1.58489
2014-01-17	0.230319			2013-11-27
2014-01-19	0.249328			2013-11-29	1.87164
2014-01-21	0.232544			2013-12-01
2014-01-23	0.205929			2013-12-03
2014-01-25	0.226049			2013-12-05
2014-01-27	0.228526			2013-12-07	1.66631
2014-01-29	0.247109			2013-12-09	1.75179
2014-01-31	0.216167			2013-12-11
2014-02-02	0.250514			2013-12-13
2014-02-04	0.217925			2013-12-15
2014-02-06	0.231582			2013-12-17
2014-02-08	0.241367			2013-12-19
2014-02-10	0.224274			2013-12-21
2014-02-12	0.224107			2013-12-23
2014-02-14	0.229116			2013-12-25
2014-02-16	0.22749			2013-12-27
2014-02-18	0.218016			2013-12-29
2014-02-20	0.211808			2013-12-31
2014-02-22	0.223579			2014-01-01	1.57282
2014-02-24	0.227771			2014-01-03
2014-02-26	0.210556			2014-01-05
2014-02-28	0.246663			2014-01-07
2014-03-02	0.238054			2014-01-09
2014-03-04	0.224602			2014-01-11
2014-03-06	0.234937			2014-01-13
2014-03-08	0.193595			2014-01-15
2014-03-10	0.198206			2014-01-17
2014-03-12	0.200237			2014-01-19	1.98902
2014-03-14	0.193297			2014-01-21
2014-03-16	0.19199			2014-01-23	1.67381
2014-03-18	0.194413			2014-01-25
2014-03-20	0.195552			2014-01-27
2014-03-22	0.194657			2014-01-29
2014-03-24	0.198227			2014-01-31	1.5484
2014-03-26	0.207966			2014-02-02
2014-03-28	0.176756			2014-02-04
2014-03-30	0.195344			2014-02-06
2014-04-01	0.200549			2014-02-08	2.10264
2014-04-03	0.199949			2014-02-10
2014-04-05	0.205158			2014-02-12
2014-04-07	0.202075			2014-02-14
2014-04-09	0.20142			2014-02-16
2014-04-11	0.206296			2014-02-18
2014-04-13	0.207638			2014-02-20
2014-04-15	0.207515			2014-02-22
2014-04-17	0.209384			2014-02-24
2014-04-19	0.223986			2014-02-26
2014-04-21	0.253092			2014-02-28	1.68094
2014-04-23	0.244928			2014-03-02	1.87898
2014-04-25	0.23129			2014-03-04	1.69633
2014-04-27	0.23089			2014-03-06
2014-04-29	0.235952			2014-03-08
2014-05-01	0.241998			2014-03-10
2014-05-03	0.233923			2014-03-12	1.71082
2014-05-05	0.233111			2014-03-14
2014-05-07	0.230659			2014-03-16	1.66827
2014-05-09	0.222304			2014-03-18	2.11926
2014-05-11	0.222321			2014-03-20
2014-05-13	0.251864			2014-03-22	1.84177
				2014-03-24
				2014-03-26	2.09223
				2014-03-28
				2014-03-30	2.00689
				2014-04-01
				2014-04-03	1.92996
				2014-04-05
				2014-04-07
				2014-04-09
				2014-04-11	2.11449
				2014-04-13
				2014-04-15
				2014-04-17	1.92728
				2014-04-19	2.08717
				2014-04-21	1.94605
				2014-04-23
				2014-04-25	2.13767
				2014-04-27	1.72525
				2014-04-29	1.64287
				2014-05-01	1.75634
				2014-05-03	2.00877
				2014-05-05	1.91676
				2014-05-07	2.11336
				2014-05-09	1.97134
				2014-05-11	1.9742
				2014-05-13
				2014-05-15	2.12039
				2014-05-17	1.60483
				2014-05-19	2.08881
				2014-05-21	2.10292
				2014-05-23	2.19406
				2014-05-25	1.9868
				2014-05-27	1.84863
				2014-05-29	1.52672
				2014-05-31	1.78391
				2014-06-02	1.7552
				2014-06-04	1.98087
				2014-06-06	1.78565
				2014-06-08
				2014-06-10	1.18812
				2014-06-12
				2014-06-14	1.51372
				2014-06-16
				2014-06-18
				2014-06-20	0.792637
				2014-06-22	1.4302
				2014-06-24	0.713943
				2014-06-26
				2014-06-28	0.701017
				2014-06-30	0.719351
				2014-07-02	1.27371

## Sheet: Temperature2013-2014
2013-2014 season						2013-2014 season
Temperatures from TP08 needle probes						10 cm depth	Hourly data from EC5 Decagon probe
date	-10cm	7cm				Date	Water Volume%	Temperature
2013-07-12						2013-07-10 14:00:00	0.573931	2.2
2013-07-14						2013-07-10 15:00:00	0.576449	2.1
2013-07-16						2013-07-10 16:00:00	0.575783	1.9
2013-07-18						2013-07-10 17:00:00	0.576316	1.8
2013-07-20						2013-07-10 18:00:00	0.576849	1.8
2013-07-22						2013-07-10 19:00:00	0.576983	1.8
2013-07-24						2013-07-10 20:00:00	0.57725	1.8
2013-07-26						2013-07-10 21:00:00	0.577384	1.8
2013-07-28	1.8213					2013-07-10 22:00:00	0.577518	1.7
2013-07-30	0.893204					2013-07-10 23:00:00	0.577652	1.7
2013-08-01	0.637177					2013-07-11	0.577518	1.6
2013-08-03	2.17366					2013-07-11 01:00:00	0.577652	1.6
2013-08-05	1.48823					2013-07-11 02:00:00	0.577652	1.5
2013-08-07	3.06145					2013-07-11 03:00:00	0.577786	1.4
2013-08-09	1.91614					2013-07-11 04:00:00	0.577921	1.3
2013-08-11	2.45238					2013-07-11 05:00:00	0.577786	1.3
2013-08-13	1.752					2013-07-11 06:00:00	0.578055	1.2
2013-08-15	1.38959					2013-07-11 07:00:00	0.577921	1.2
2013-08-17	-0.0756073					2013-07-11 08:00:00	0.578055	1.2
2013-08-19	0.626679					2013-07-11 09:00:00	0.578189	1.2
2013-08-21	0.75354					2013-07-11 10:00:00	0.578189	1.2
2013-08-23	-0.0725708					2013-07-11 11:00:00	0.578189	1.2
2013-08-25	0.22345					2013-07-11 12:00:00	0.577786	1.3
2013-08-27	-0.146362					2013-07-11 13:00:00	0.577786	1.4
2013-08-29	0.0189209					2013-07-11 14:00:00	0.577518	1.6
2013-08-31	-0.157623					2013-07-11 15:00:00	0.577117	1.8
2013-09-02	0.0189209					2013-07-11 16:00:00	0.576716	2
2013-09-04	-0.0983887					2013-07-11 17:00:00	0.576582	2.1
2013-09-06	-0.109116					2013-07-11 18:00:00	0.575916	2.2
2013-09-08	-0.459061					2013-07-11 19:00:00	0.576316	2.3
2013-09-10	-0.402222					2013-07-11 20:00:00	0.576049	2.4
2013-09-12	-0.460831					2013-07-11 21:00:00	0.575651	2.4
2013-09-14	-0.459274					2013-07-11 22:00:00	0.57512	2.4
2013-09-16	-0.497711					2013-07-11 23:00:00	0.574723	2.4
2013-09-18	-0.354355					2013-07-12	0.574459	2.3
2013-09-20	-0.460831					2013-07-12 01:00:00	0.574327	2.2
2013-09-22	-0.48526					2013-07-12 02:00:00	0.574063	2.1
2013-09-24	-0.503647					2013-07-12 03:00:00	0.573931	2
2013-09-26	-0.460861					2013-07-12 04:00:00	0.573931	1.9
2013-09-28	-0.677704					2013-07-12 05:00:00	0.573931	1.8
2013-09-30	-0.786316					2013-07-12 06:00:00	0.573931	1.7
2013-10-02	-1.0572					2013-07-12 07:00:00	0.573931	1.6
2013-10-04	-1.78247					2013-07-12 08:00:00	0.573931	1.6
2013-10-06	-3.56145					2013-07-12 09:00:00	0.574063	1.5
2013-10-08	-6.04723					2013-07-12 10:00:00	0.573405	1.5
2013-10-10	-7.99756					2013-07-12 11:00:00	0.57288	1.5
2013-10-12	-6.83211					2013-07-12 12:00:00	0.572749	1.5
2013-10-14	-5.14061					2013-07-12 13:00:00	0.572226	1.6
2013-10-16	-4.68407	-3.36726				2013-07-12 14:00:00	0.571835	1.7
2013-10-18	-4.412	-7.2511				2013-07-12 15:00:00	0.569887	1.8
2013-10-20	-4.75395	-5.07298				2013-07-12 16:00:00	0.565663	1.9
2013-10-22	-6.99597	-16.6135				2013-07-12 17:00:00	0.570146	1.9
2013-10-24	-6.71281	-9.94742				2013-07-12 18:00:00	0.575385	1.9
2013-10-26	-6.87201	-11.829				2013-07-12 19:00:00	0.579268	1.9
2013-10-28	-7.97514	-20.5187				2013-07-12 20:00:00	0.585447	1.8
2013-10-30	-9.31509	-19.7117				2013-07-12 21:00:00	0.590107	1.8
2013-11-01	-9.23547	-22.2159				2013-07-12 22:00:00	0.591542	1.8
2013-11-03	-10.6168	-22.3212				2013-07-12 23:00:00	0.591254	1.7
2013-11-05	-10.6516	-16.1342				2013-07-13	0.589536	1.6
2013-11-07	-9.8455	-13.4079				2013-07-13 01:00:00	0.588258	1.5
2013-11-09	-10.4736	-25.5135				2013-07-13 02:00:00	0.586566	1.5
2013-11-11	-13.3877	-30.3905				2013-07-13 03:00:00	0.583919	1.4
2013-11-13	-14.762	-23.45				2013-07-13 04:00:00	0.582402	1.3
2013-11-15	-14.8855	-31.5842				2013-07-13 05:00:00	0.581443	1.3
2013-11-17	-15.1583	-25.0111				2013-07-13 06:00:00	0.580081	1.2
2013-11-19	-14.7943	-21.8694				2013-07-13 07:00:00	0.578728	1.2
2013-11-21	-15.9528	-23.8816				2013-07-13 08:00:00	0.578055	1.2
2013-11-23	-19.8229	-34.9764				2013-07-13 09:00:00	0.576983	1.2
2013-11-25	-21.4188	-35.9876				2013-07-13 10:00:00	0.576849	1.2
2013-11-27	-22.3396	-37.4307				2013-07-13 11:00:00	0.576716	1.2
2013-11-29	-23.3854	-27.0794				2013-07-13 12:00:00	0.577518	1.3
2013-12-01	-17.6148	-16.2667				2013-07-13 13:00:00	0.578055	1.4
2013-12-03	-18.1541	-22.1004				2013-07-13 14:00:00	0.577786	1.6
2013-12-05	-20.1591	-29.3244				2013-07-13 15:00:00	0.578055	1.7
2013-12-07	-23.4452	-37.1911				2013-07-13 16:00:00	0.577921	1.8
2013-12-09	-24.5481	-31.6301				2013-07-13 17:00:00	0.577786	2
2013-12-11	-25.5938	-38.4638				2013-07-13 18:00:00	0.578189	2.1
2013-12-13	-26.8323	-37.7275				2013-07-13 19:00:00	0.578459	2.2
2013-12-15	-26.6826	-38.2308				2013-07-13 20:00:00	0.579133	2.3
2013-12-17	-27.8192	-39.4657				2013-07-13 21:00:00	0.579539	2.4
2013-12-19	-28.7604	-41.2467				2013-07-13 22:00:00	0.580081	2.4
2013-12-21	-27.1407	-28.3198				2013-07-13 23:00:00	0.580761	2.4
2013-12-23	-29.2373	-41.2152				2013-07-14	0.581306	2.4
2013-12-25	-26.2943	-26.3058				2013-07-14 01:00:00	0.581716	2.4
2013-12-27	-24.4737	-24.2234				2013-07-14 02:00:00	0.582127	2.3
2013-12-29	-26.4683	-36.9403				2013-07-14 03:00:00	0.582402	2.2
2013-12-31	-28.6552	-39.5352				2013-07-14 04:00:00	0.582952	2.1
2014-01-01	-28.4012	-31.2312				2013-07-14 05:00:00	0.58309	2.1
2014-01-03	-29.0764	-35.0007				2013-07-14 06:00:00	0.583504	2
2014-01-05	-28.213	-32.4674				2013-07-14 07:00:00	0.583919	1.9
2014-01-07	-28.5152	-41.0796				2013-07-14 08:00:00	0.584473	1.9
2014-01-09	-26.0044	-22.7081				2013-07-14 09:00:00	0.584612	1.9
2014-01-11	-24.5966	-25.6237				2013-07-14 10:00:00	0.58489	1.9
2014-01-13	-26.1122	-31.5934				2013-07-14 11:00:00	0.585168	1.9
2014-01-15	-26.2821	-24.772				2013-07-14 12:00:00	0.585726	2
2014-01-17	-24.7055	-27.8397				2013-07-14 13:00:00	0.585866	2.1
2014-01-19	-27.1842	-35.6035				2013-07-14 14:00:00	0.586566	2.2
2014-01-21	-28.0551	-37.5752				2013-07-14 15:00:00	0.586847	2.4
2014-01-23	-28.5138	-37.859				2013-07-14 16:00:00	0.587128	2.6
2014-01-25	-27.8176	-28.5709				2013-07-14 17:00:00	0.587833	2.8
2014-01-27	-27.3672	-32.3766				2013-07-14 18:00:00	0.588541	3
2014-01-29	-27.0665	-31.0963				2013-07-14 19:00:00	0.588683	3.1
2014-01-31	-25.2596	-27.0747				2013-07-14 20:00:00	0.588967	3.1
2014-02-02	-26.2594	-29.2014				2013-07-14 21:00:00	0.589251	3.1
2014-02-04	-25.5916	-29.662				2013-07-14 22:00:00	0.589678	3
2014-02-06	-26.2409	-34.0774				2013-07-14 23:00:00	0.589821	2.9
2014-02-08	-25.0691	-27.382				2013-07-15	0.590107	2.8
2014-02-10	-26.9923	-36.9085				2013-07-15 01:00:00	0.590536	2.7
2014-02-12	-26.905	-35.1136				2013-07-15 02:00:00	0.590966	2.6
2014-02-14	-28.24	-39.2791				2013-07-15 03:00:00	0.591398	2.4
2014-02-16	-29.627	-40.6259				2013-07-15 04:00:00	0.59183	2.3
2014-02-18	-29.7739	-36.771				2013-07-15 05:00:00	0.592119	2.2
2014-02-20	-29.75	-36.0593				2013-07-15 06:00:00	0.592697	2.1
2014-02-22	-28.3956	-33.9182				2013-07-15 07:00:00	0.592697	2
2014-02-24	-28.2995	-34.8286				2013-07-15 08:00:00	0.593132	2
2014-02-26	-28.9471	-32.9175				2013-07-15 09:00:00	0.593569	2
2014-02-28	-28.682	-34.9519				2013-07-15 10:00:00	0.59386	2
2014-03-02	-27.8407	-30.9566				2013-07-15 11:00:00	0.593714	2
2014-03-04	-27.0182	-28.1829				2013-07-15 12:00:00	0.593714	2.1
2014-03-06	-26.2545	-30.352				2013-07-15 13:00:00	0.593423	2.1
2014-03-08	-28.3687	-39.8661				2013-07-15 14:00:00	0.593278	2.2
2014-03-10	-29.6952	-39.6397				2013-07-15 15:00:00	0.592987	2.3
2014-03-12	-29.8932	-38.7562				2013-07-15 16:00:00	0.592552	2.4
2014-03-14	-29.8289	-37.7736				2013-07-15 17:00:00	0.592408	2.5
2014-03-16	-29.2605	-29.0538				2013-07-15 18:00:00	0.592552	2.5
2014-03-18	-28.35	-36.1445				2013-07-15 19:00:00	0.592408	2.5
2014-03-20	-29.4262	-38.4639				2013-07-15 20:00:00	0.592552	2.4
2014-03-22	-29.836	-38.0104				2013-07-15 21:00:00	0.592408	2.4
2014-03-24	-29.8933	-37.2225				2013-07-15 22:00:00	0.592552	2.4
2014-03-26	-29.3224	-33.2826				2013-07-15 23:00:00	0.592697	2.3
2014-03-28	-27.9729	-30.9347				2013-07-16	0.592842	2.3
2014-03-30	-28.1563	-34.518				2013-07-16 01:00:00	0.592697	2.2
2014-04-01	-25.6108	-23.9784				2013-07-16 02:00:00	0.592842	2.1
2014-04-03	-25.462	-27.7881				2013-07-16 03:00:00	0.592842	2.1
2014-04-05	-24.3513	-24.0497				2013-07-16 04:00:00	0.592842	2
2014-04-07	-25.4498	-26.2993				2013-07-16 05:00:00	0.593132	2
2014-04-09	-25.9679	-29.8501				2013-07-16 06:00:00	0.593132	1.9
2014-04-11	-24.5721	-24.4915				2013-07-16 07:00:00	0.593132	1.9
2014-04-13	-23.2018	-24.5415				2013-07-16 08:00:00	0.592842	1.9
2014-04-15	-23.3823	-24.2127				2013-07-16 09:00:00	0.592552	1.9
2014-04-17	-21.8226	-21.2588				2013-07-16 10:00:00	0.592263	1.9
2014-04-19	-20.0057	-20.5617				2013-07-16 11:00:00	0.591974	2
2014-04-21	-20.0934	-18.2299				2013-07-16 12:00:00	0.591542	2.1
2014-04-23	-20.6235	-24.2828				2013-07-16 13:00:00	0.590966	2.3
2014-04-25	-19.8183	-18.9324				2013-07-16 14:00:00	0.590536	2.5
2014-04-27	-20.7956	-25.6572				2013-07-16 15:00:00	0.589964	2.7
2014-04-29	-20.6001	-19.468				2013-07-16 16:00:00	0.589251	2.9
2014-05-01	-17.8133	-15.2443				2013-07-16 17:00:00	0.588825	3.1
2014-05-03	-18.5441	-19.6376				2013-07-16 18:00:00	0.588258	3.3
2014-05-05	-18.1148	-15.753				2013-07-16 19:00:00	0.58741	3.4
2014-05-07	-17.0894	-16.5872				2013-07-16 20:00:00	0.586707	3.5
2014-05-09	-16.3316	-16.3584				2013-07-16 21:00:00	0.586286	3.6
2014-05-11	-15.2608	-13.3619				2013-07-16 22:00:00	0.586146	3.7
2014-05-13	-13.3061	-9.19896				2013-07-16 23:00:00	0.586707	3.7
2014-05-15	-12.8672	-10.3378				2013-07-17	0.586707	3.6
2014-05-17	-13.7903	-11.3201				2013-07-17 01:00:00	0.586847	3.5
2014-05-19	-13.7383	-13.0206				2013-07-17 02:00:00	0.586988	3.4
2014-05-21	-13.4966	-10.7268				2013-07-17 03:00:00	0.586707	3.3
2014-05-23	-12.3384	-7.55644				2013-07-17 04:00:00	0.586988	3.2
2014-05-25	-11.7254	-9.04979				2013-07-17 05:00:00	0.586988	3
2014-05-27	-10.3313	-6.4613				2013-07-17 06:00:00	0.586707	3
2014-05-29	-5.7618	-4.43367				2013-07-17 07:00:00	0.586426	2.9
2014-05-31	-2.46075	-4.70567				2013-07-17 08:00:00	0.586146	2.8
2014-06-02	-2.61072	-0.231644				2013-07-17 09:00:00	0.585447	2.7
2014-06-04	-3.51877	-3.03032				2013-07-17 10:00:00	0.58489	2.7
2014-06-06	-2.11591	-0.103683				2013-07-17 11:00:00	0.584057	2.7
2014-06-08	-1.29137	2.02672				2013-07-17 12:00:00	0.582814	2.8
2014-06-10	-0.449966	2.98813				2013-07-17 13:00:00	0.581716	2.9
2014-06-12	-0.655747	2.14529				2013-07-17 14:00:00	0.580217	3
2014-06-14	-0.491226	2.13281				2013-07-17 15:00:00	0.579133	3.2
2014-06-16	-0.500168	2.47087				2013-07-17 16:00:00	0.578459	3.5
2014-06-18	-0.476517	2.06796				2013-07-17 17:00:00	0.578189	3.7
2014-06-20	-0.476517	6.89748				2013-07-17 18:00:00	0.577117	3.9
2014-06-22	-0.369949	3.47902				2013-07-17 19:00:00	0.576449	4.1
2014-06-24	-0.339142	6.44081				2013-07-17 20:00:00	0.576182	4.2
2014-06-26	-0.359421	4.53857				2013-07-17 21:00:00	0.575916	4.3
2014-06-28		9.04359				2013-07-17 22:00:00	0.575916	4.3
2014-06-30		4.42018				2013-07-17 23:00:00	0.575783	4.2
2014-07-02		5.71399				2013-07-18	0.575651	4.1
						2013-07-18 01:00:00	0.575783	4
						2013-07-18 02:00:00	0.576049	3.8
						2013-07-18 03:00:00	0.576182	3.6
						2013-07-18 04:00:00	0.576049	3.4
						2013-07-18 05:00:00	0.576449	3.3
						2013-07-18 06:00:00	0.576582	3.1
						2013-07-18 07:00:00	0.576582	3
						2013-07-18 08:00:00	0.576316	2.9
						2013-07-18 09:00:00	0.576182	2.8
						2013-07-18 10:00:00	0.575916	2.8
						2013-07-18 11:00:00	0.575916	2.8
						2013-07-18 12:00:00	0.575385	2.9
						2013-07-18 13:00:00	0.57512	3
						2013-07-18 14:00:00	0.574723	3.2
						2013-07-18 15:00:00	0.574195	3.4
						2013-07-18 16:00:00	0.5738	3.6
						2013-07-18 17:00:00	0.573274	3.8
						2013-07-18 18:00:00	0.573011	3.9
						2013-07-18 19:00:00	0.572749	4.1
						2013-07-18 20:00:00	0.572488	4.1
						2013-07-18 21:00:00	0.572357	4.1
						2013-07-18 22:00:00	0.572226	4.1
						2013-07-18 23:00:00	0.572226	4.1
						2013-07-19	0.572357	4
						2013-07-19 01:00:00	0.572226	3.9
						2013-07-19 02:00:00	0.572357	3.8
						2013-07-19 03:00:00	0.572488	3.6
						2013-07-19 04:00:00	0.572618	3.4
						2013-07-19 05:00:00	0.572749	3.2
						2013-07-19 06:00:00	0.57288	3.1
						2013-07-19 07:00:00	0.573011	3
						2013-07-19 08:00:00	0.573011	2.9
						2013-07-19 09:00:00	0.573011	2.9
						2013-07-19 10:00:00	0.572749	2.9
						2013-07-19 11:00:00	0.572749	2.9
						2013-07-19 12:00:00	0.572618	3
						2013-07-19 13:00:00	0.572357	3
						2013-07-19 14:00:00	0.572226	3.1
						2013-07-19 15:00:00	0.571965	3.2
						2013-07-19 16:00:00	0.571574	3.3
						2013-07-19 17:00:00	0.571314	3.4
						2013-07-19 18:00:00	0.571054	3.5
						2013-07-19 19:00:00	0.570794	3.6
						2013-07-19 20:00:00	0.570664	3.7
						2013-07-19 21:00:00	0.570405	3.7
						2013-07-19 22:00:00	0.570275	3.7
						2013-07-19 23:00:00	0.570275	3.6
						2013-07-20	0.570275	3.6
						2013-07-20 01:00:00	0.570405	3.5
						2013-07-20 02:00:00	0.570534	3.3
						2013-07-20 03:00:00	0.570534	3.2
						2013-07-20 04:00:00	0.570664	3
						2013-07-20 05:00:00	0.570794	2.9
						2013-07-20 06:00:00	0.570924	2.7
						2013-07-20 07:00:00	0.571054	2.6
						2013-07-20 08:00:00	0.571184	2.5
						2013-07-20 09:00:00	0.571314	2.5
						2013-07-20 10:00:00	0.571444	2.5
						2013-07-20 11:00:00	0.571314	2.6
						2013-07-20 12:00:00	0.571444	2.7
						2013-07-20 13:00:00	0.571184	2.8
						2013-07-20 14:00:00	0.571054	2.9
						2013-07-20 15:00:00	0.571054	3.1
						2013-07-20 16:00:00	0.570924	3.2
						2013-07-20 17:00:00	0.570534	3.4
						2013-07-20 18:00:00	0.570405	3.6
						2013-07-20 19:00:00	0.570146	3.8
						2013-07-20 20:00:00	0.569887	3.9
						2013-07-20 21:00:00	0.5695	4
						2013-07-20 22:00:00	0.569371	4
						2013-07-20 23:00:00	0.569242	4
						2013-07-21	0.569242	3.9
						2013-07-21 01:00:00	0.568985	3.9
						2013-07-21 02:00:00	0.569242	3.7
						2013-07-21 03:00:00	0.569371	3.5
						2013-07-21 04:00:00	0.5695	3.3
						2013-07-21 05:00:00	0.569629	3.1
						2013-07-21 06:00:00	0.570017	2.9
						2013-07-21 07:00:00	0.570017	2.8
						2013-07-21 08:00:00	0.570405	2.7
						2013-07-21 09:00:00	0.570405	2.6
						2013-07-21 10:00:00	0.570534	2.6
						2013-07-21 11:00:00	0.570534	2.7
						2013-07-21 12:00:00	0.570534	2.8
						2013-07-21 13:00:00	0.570405	3
						2013-07-21 14:00:00	0.570017	3.1
						2013-07-21 15:00:00	0.569887	3.3
						2013-07-21 16:00:00	0.569629	3.4
						2013-07-21 17:00:00	0.569113	3.6
						2013-07-21 18:00:00	0.568856	3.8
						2013-07-21 19:00:00	0.56847	4
						2013-07-21 20:00:00	0.568214	4.1
						2013-07-21 21:00:00	0.567957	4.1
						2013-07-21 22:00:00	0.567829	4.1
						2013-07-21 23:00:00	0.567701	4.1
						2013-07-22	0.567701	4
						2013-07-22 01:00:00	0.567829	3.9
						2013-07-22 02:00:00	0.567829	3.7
						2013-07-22 03:00:00	0.567957	3.5
						2013-07-22 04:00:00	0.568214	3.3
						2013-07-22 05:00:00	0.568214	3.1
						2013-07-22 06:00:00	0.56847	3
						2013-07-22 07:00:00	0.568599	2.8
						2013-07-22 08:00:00	0.568856	2.7
						2013-07-22 09:00:00	0.568985	2.6
						2013-07-22 10:00:00	0.569242	2.6
						2013-07-22 11:00:00	0.569113	2.6
						2013-07-22 12:00:00	0.569242	2.7
						2013-07-22 13:00:00	0.569371	2.7
						2013-07-22 14:00:00	0.569242	2.8
						2013-07-22 15:00:00	0.569113	2.9
						2013-07-22 16:00:00	0.568727	3.1
						2013-07-22 17:00:00	0.568727	3.2
						2013-07-22 18:00:00	0.568214	3.4
						2013-07-22 19:00:00	0.567829	3.5
						2013-07-22 20:00:00	0.567573	3.6
						2013-07-22 21:00:00	0.567701	3.6
						2013-07-22 22:00:00	0.567573	3.6
						2013-07-22 23:00:00	0.567446	3.6
						2013-07-23	0.567573	3.5
						2013-07-23 01:00:00	0.567573	3.4
						2013-07-23 02:00:00	0.567573	3.3
						2013-07-23 03:00:00	0.567573	3.1
						2013-07-23 04:00:00	0.567701	2.9
						2013-07-23 05:00:00	0.567957	2.7
						2013-07-23 06:00:00	0.567957	2.5
						2013-07-23 07:00:00	0.568342	2.4
						2013-07-23 08:00:00	0.568599	2.3
						2013-07-23 09:00:00	0.568599	2.2
						2013-07-23 10:00:00	0.568599	2.3
						2013-07-23 11:00:00	0.568599	2.4
						2013-07-23 12:00:00	0.568599	2.5
						2013-07-23 13:00:00	0.56847	2.7
						2013-07-23 14:00:00	0.568214	2.9
						2013-07-23 15:00:00	0.567957	3.1
						2013-07-23 16:00:00	0.567573	3.4
						2013-07-23 17:00:00	0.56719	3.6
						2013-07-23 18:00:00	0.566553	3.8
						2013-07-23 19:00:00	0.566171	4
						2013-07-23 20:00:00	0.56579	4.1
						2013-07-23 21:00:00	0.565536	4.2
						2013-07-23 22:00:00	0.565157	4.2
						2013-07-23 23:00:00	0.565157	4.2
						2013-07-24	0.565157	4.1
						2013-07-24 01:00:00	0.565283	4
						2013-07-24 02:00:00	0.565283	3.8
						2013-07-24 03:00:00	0.565157	3.7
						2013-07-24 04:00:00	0.56541	3.5
						2013-07-24 05:00:00	0.565663	3.3
						2013-07-24 06:00:00	0.566044	3.1
						2013-07-24 07:00:00	0.566171	3
						2013-07-24 08:00:00	0.566298	2.9
						2013-07-24 09:00:00	0.566171	2.9
						2013-07-24 10:00:00	0.566171	2.9
						2013-07-24 11:00:00	0.565917	3
						2013-07-24 12:00:00	0.56579	3.2
						2013-07-24 13:00:00	0.565663	3.3
						2013-07-24 14:00:00	0.565536	3.5
						2013-07-24 15:00:00	0.565536	3.7
						2013-07-24 16:00:00	0.564904	4
						2013-07-24 17:00:00	0.564651	4.2
						2013-07-24 18:00:00	0.564399	4.4
						2013-07-24 19:00:00	0.564021	4.6
						2013-07-24 20:00:00	0.563643	4.8
						2013-07-24 21:00:00	0.563517	4.9
						2013-07-24 22:00:00	0.563266	4.9
						2013-07-24 23:00:00	0.563141	4.9
						2013-07-25	0.563266	4.9
						2013-07-25 01:00:00	0.563141	4.7
						2013-07-25 02:00:00	0.563266	4.6
						2013-07-25 03:00:00	0.563392	4.4
						2013-07-25 04:00:00	0.563392	4.2
						2013-07-25 05:00:00	0.563895	4.1
						2013-07-25 06:00:00	0.564146	4
						2013-07-25 07:00:00	0.564273	3.9
						2013-07-25 08:00:00	0.564525	3.8
						2013-07-25 09:00:00	0.565536	3.7
						2013-07-25 10:00:00	0.566425	3.7
						2013-07-25 11:00:00	0.566807	3.7
						2013-07-25 12:00:00	0.567318	3.7
						2013-07-25 13:00:00	0.568086	3.7
						2013-07-25 14:00:00	0.567829	3.7
						2013-07-25 15:00:00	0.567829	3.7
						2013-07-25 16:00:00	0.567701	3.8
						2013-07-25 17:00:00	0.567573	3.8
						2013-07-25 18:00:00	0.567446	3.9
						2013-07-25 19:00:00	0.56719	3.9
						2013-07-25 20:00:00	0.567446	3.9
						2013-07-25 21:00:00	0.567318	3.9
						2013-07-25 22:00:00	0.567318	3.8
						2013-07-25 23:00:00	0.56719	3.8
						2013-07-26	0.567318	3.7
						2013-07-26 01:00:00	0.567318	3.7
						2013-07-26 02:00:00	0.567573	3.6
						2013-07-26 03:00:00	0.567446	3.5
						2013-07-26 04:00:00	0.567573	3.4
						2013-07-26 05:00:00	0.567701	3.3
						2013-07-26 06:00:00	0.567829	3.1
						2013-07-26 07:00:00	0.567957	3.1
						2013-07-26 08:00:00	0.568214	3
						2013-07-26 09:00:00	0.568214	2.9
						2013-07-26 10:00:00	0.568214	2.9
						2013-07-26 11:00:00	0.56847	2.8
						2013-07-26 12:00:00	0.568342	2.8
						2013-07-26 13:00:00	0.56847	2.9
						2013-07-26 14:00:00	0.568342	3
						2013-07-26 15:00:00	0.568342	3.1
						2013-07-26 16:00:00	0.56847	3.2
						2013-07-26 17:00:00	0.568342	3.3
						2013-07-26 18:00:00	0.568086	3.5
						2013-07-26 19:00:00	0.567957	3.6
						2013-07-26 20:00:00	0.567701	3.8
						2013-07-26 21:00:00	0.567446	3.9
						2013-07-26 22:00:00	0.567318	3.9
						2013-07-26 23:00:00	0.567318	3.9
						2013-07-27	0.567318	3.9
						2013-07-27 01:00:00	0.567318	3.8
						2013-07-27 02:00:00	0.567318	3.7
						2013-07-27 03:00:00	0.567573	3.6
						2013-07-27 04:00:00	0.567701	3.5
						2013-07-27 05:00:00	0.567829	3.4
						2013-07-27 06:00:00	0.567829	3.4
						2013-07-27 07:00:00	0.567957	3.3
						2013-07-27 08:00:00	0.568214	3.2
						2013-07-27 09:00:00	0.56847	3.2
						2013-07-27 10:00:00	0.568342	3.1
						2013-07-27 11:00:00	0.56847	3.1
						2013-07-27 12:00:00	0.568342	3.1
						2013-07-27 13:00:00	0.568342	3.2
						2013-07-27 14:00:00	0.568214	3.2
						2013-07-27 15:00:00	0.568086	3.3
						2013-07-27 16:00:00	0.567957	3.4
						2013-07-27 17:00:00	0.567829	3.5
						2013-07-27 18:00:00	0.567701	3.6
						2013-07-27 19:00:00	0.567446	3.7
						2013-07-27 20:00:00	0.567062	3.8
						2013-07-27 21:00:00	0.567062	3.9
						2013-07-27 22:00:00	0.567062	3.9
						2013-07-27 23:00:00	0.566935	3.9
						2013-07-28	0.566935	3.8
						2013-07-28 01:00:00	0.567062	3.7
						2013-07-28 02:00:00	0.56719	3.5
						2013-07-28 03:00:00	0.567446	3.4
						2013-07-28 04:00:00	0.567446	3.3
						2013-07-28 05:00:00	0.567829	3.2
						2013-07-28 06:00:00	0.567701	3.1
						2013-07-28 07:00:00	0.567701	3
						2013-07-28 08:00:00	0.568086	2.9
						2013-07-28 09:00:00	0.567957	2.8
						2013-07-28 10:00:00	0.568086	2.8
						2013-07-28 11:00:00	0.567957	2.8
						2013-07-28 12:00:00	0.568214	2.7
						2013-07-28 13:00:00	0.568086	2.8
						2013-07-28 14:00:00	0.568086	2.8
						2013-07-28 15:00:00	0.568214	2.7
						2013-07-28 16:00:00	0.568086	2.7
						2013-07-28 17:00:00	0.568214	2.7
						2013-07-28 18:00:00	0.568214	2.7
						2013-07-28 19:00:00	0.568214	2.7
						2013-07-28 20:00:00	0.568214	2.8
						2013-07-28 21:00:00	0.568086	2.8
						2013-07-28 22:00:00	0.567957	2.8
						2013-07-28 23:00:00	0.567957	2.7
						2013-07-29	0.568086	2.6
						2013-07-29 01:00:00	0.567957	2.5
						2013-07-29 02:00:00	0.568086	2.4
						2013-07-29 03:00:00	0.568214	2.2
						2013-07-29 04:00:00	0.568342	2.1
						2013-07-29 05:00:00	0.568342	2
						2013-07-29 06:00:00	0.568342	1.9
						2013-07-29 07:00:00	0.568599	1.8
						2013-07-29 08:00:00	0.568727	1.7
						2013-07-29 09:00:00	0.568856	1.6
						2013-07-29 10:00:00	0.568985	1.6
						2013-07-29 11:00:00	0.569242	1.6
						2013-07-29 12:00:00	0.569113	1.8
						2013-07-29 13:00:00	0.568985	1.9
						2013-07-29 14:00:00	0.568727	2.1
						2013-07-29 15:00:00	0.568342	2.3
						2013-07-29 16:00:00	0.567829	2.5
						2013-07-29 17:00:00	0.567573	2.6
						2013-07-29 18:00:00	0.567446	2.8
						2013-07-29 19:00:00	0.567318	2.9
						2013-07-29 20:00:00	0.567062	2.9
						2013-07-29 21:00:00	0.56719	2.9
						2013-07-29 22:00:00	0.56719	2.9
						2013-07-29 23:00:00	0.56719	2.9
						2013-07-30	0.56719	2.8
						2013-07-30 01:00:00	0.567318	2.7
						2013-07-30 02:00:00	0.56719	2.6
						2013-07-30 03:00:00	0.567318	2.4
						2013-07-30 04:00:00	0.567446	2.3
						2013-07-30 05:00:00	0.567573	2.2
						2013-07-30 06:00:00	0.567573	2.1
						2013-07-30 07:00:00	0.567701	1.9
						2013-07-30 08:00:00	0.568086	1.8
						2013-07-30 09:00:00	0.568086	1.8
						2013-07-30 10:00:00	0.568214	1.7
						2013-07-30 11:00:00	0.568214	1.6
						2013-07-30 12:00:00	0.56847	1.7
						2013-07-30 13:00:00	0.568214	1.8
						2013-07-30 14:00:00	0.568214	1.9
						2013-07-30 15:00:00	0.568086	2.1
						2013-07-30 16:00:00	0.567829	2.2
						2013-07-30 17:00:00	0.567957	2.3
						2013-07-30 18:00:00	0.567829	2.4
						2013-07-30 19:00:00	0.567829	2.4
						2013-07-30 20:00:00	0.567829	2.5
						2013-07-30 21:00:00	0.567701	2.5
						2013-07-30 22:00:00	0.567957	2.4
						2013-07-30 23:00:00	0.568086	2.4
						2013-07-31	0.567957	2.4
						2013-07-31 01:00:00	0.568086	2.3
						2013-07-31 02:00:00	0.568214	2.3
						2013-07-31 03:00:00	0.568214	2.2
						2013-07-31 04:00:00	0.568214	2.2
						2013-07-31 05:00:00	0.568214	2.1
						2013-07-31 06:00:00	0.568342	2
						2013-07-31 07:00:00	0.56847	2
						2013-07-31 08:00:00	0.568599	1.9
						2013-07-31 09:00:00	0.568599	1.9
						2013-07-31 10:00:00	0.568599	1.8
						2013-07-31 11:00:00	0.568727	1.8
						2013-07-31 12:00:00	0.568727	1.8
						2013-07-31 13:00:00	0.568599	1.9
						2013-07-31 14:00:00	0.56847	2
						2013-07-31 15:00:00	0.56847	2.1
						2013-07-31 16:00:00	0.568214	2.2
						2013-07-31 17:00:00	0.567957	2.3
						2013-07-31 18:00:00	0.567701	2.4
						2013-07-31 19:00:00	0.567573	2.4
						2013-07-31 20:00:00	0.567446	2.4
						2013-07-31 21:00:00	0.56719	2.4
						2013-07-31 22:00:00	0.567318	2.4
						2013-07-31 23:00:00	0.567318	2.4
						2013-08-01	0.56719	2.3
						2013-08-01 01:00:00	0.567446	2.3
						2013-08-01 02:00:00	0.567573	2.1
						2013-08-01 03:00:00	0.567573	2
						2013-08-01 04:00:00	0.567701	1.9
						2013-08-01 05:00:00	0.567829	1.8
						2013-08-01 06:00:00	0.567957	1.7
						2013-08-01 07:00:00	0.568086	1.6
						2013-08-01 08:00:00	0.56847	1.5
						2013-08-01 09:00:00	0.568342	1.5
						2013-08-01 10:00:00	0.56847	1.5
						2013-08-01 11:00:00	0.568599	1.6
						2013-08-01 12:00:00	0.568342	1.7
						2013-08-01 13:00:00	0.568342	1.9
						2013-08-01 14:00:00	0.567957	2.2
						2013-08-01 15:00:00	0.567701	2.4
						2013-08-01 16:00:00	0.567446	2.7
						2013-08-01 17:00:00	0.567062	2.9
						2013-08-01 18:00:00	0.56668	3.1
						2013-08-01 19:00:00	0.566171	3.3
						2013-08-01 20:00:00	0.566044	3.5
						2013-08-01 21:00:00	0.56579	3.5
						2013-08-01 22:00:00	0.565536	3.6
						2013-08-01 23:00:00	0.565536	3.5
						2013-08-02	0.565663	3.5
						2013-08-02 01:00:00	0.565536	3.4
						2013-08-02 02:00:00	0.565663	3.3
						2013-08-02 03:00:00	0.565663	3.2
						2013-08-02 04:00:00	0.565917	3.1
						2013-08-02 05:00:00	0.565917	3
						2013-08-02 06:00:00	0.566171	2.9
						2013-08-02 07:00:00	0.566171	2.8
						2013-08-02 08:00:00	0.566298	2.7
						2013-08-02 09:00:00	0.566298	2.6
						2013-08-02 10:00:00	0.566298	2.6
						2013-08-02 11:00:00	0.566298	2.7
						2013-08-02 12:00:00	0.566171	2.9
						2013-08-02 13:00:00	0.565917	3
						2013-08-02 14:00:00	0.56579	3.3
						2013-08-02 15:00:00	0.565536	3.5
						2013-08-02 16:00:00	0.565157	3.7
						2013-08-02 17:00:00	0.564777	3.9
						2013-08-02 18:00:00	0.564525	4.1
						2013-08-02 19:00:00	0.564273	4.2
						2013-08-02 20:00:00	0.564021	4.3
						2013-08-02 21:00:00	0.563895	4.4
						2013-08-02 22:00:00	0.563643	4.4
						2013-08-02 23:00:00	0.563643	4.3
						2013-08-03	0.563769	4.2
						2013-08-03 01:00:00	0.563769	4.1
						2013-08-03 02:00:00	0.564021	3.9
						2013-08-03 03:00:00	0.564021	3.8
						2013-08-03 04:00:00	0.564146	3.6
						2013-08-03 05:00:00	0.564273	3.4
						2013-08-03 06:00:00	0.564399	3.3
						2013-08-03 07:00:00	0.564525	3.2
						2013-08-03 08:00:00	0.564777	3.1
						2013-08-03 09:00:00	0.564904	3
						2013-08-03 10:00:00	0.564777	3
						2013-08-03 11:00:00	0.564904	3
						2013-08-03 12:00:00	0.564904	3
						2013-08-03 13:00:00	0.564777	3.1
						2013-08-03 14:00:00	0.564777	3.2
						2013-08-03 15:00:00	0.564525	3.3
						2013-08-03 16:00:00	0.564525	3.4
						2013-08-03 17:00:00	0.564399	3.4
						2013-08-03 18:00:00	0.564399	3.5
						2013-08-03 19:00:00	0.564273	3.5
						2013-08-03 20:00:00	0.564146	3.6
						2013-08-03 21:00:00	0.564146	3.5
						2013-08-03 22:00:00	0.564021	3.5
						2013-08-03 23:00:00	0.564021	3.5
						2013-08-04	0.564021	3.4
						2013-08-04 01:00:00	0.564146	3.3
						2013-08-04 02:00:00	0.564273	3.2
						2013-08-04 03:00:00	0.564273	3.1
						2013-08-04 04:00:00	0.564525	2.9
						2013-08-04 05:00:00	0.564651	2.8
						2013-08-04 06:00:00	0.564904	2.6
						2013-08-04 07:00:00	0.564904	2.5
						2013-08-04 08:00:00	0.56503	2.4
						2013-08-04 09:00:00	0.565157	2.4
						2013-08-04 10:00:00	0.565157	2.4
						2013-08-04 11:00:00	0.565283	2.4
						2013-08-04 12:00:00	0.565157	2.4
						2013-08-04 13:00:00	0.565157	2.6
						2013-08-04 14:00:00	0.565157	2.7
						2013-08-04 15:00:00	0.564777	2.9
						2013-08-04 16:00:00	0.564399	3
						2013-08-04 17:00:00	0.564273	3.2
						2013-08-04 18:00:00	0.563895	3.3
						2013-08-04 19:00:00	0.563769	3.3
						2013-08-04 20:00:00	0.563769	3.4
						2013-08-04 21:00:00	0.563517	3.4
						2013-08-04 22:00:00	0.563392	3.3
						2013-08-04 23:00:00	0.563266	3.3
						2013-08-05	0.563392	3.2
						2013-08-05 01:00:00	0.563392	3.1
						2013-08-05 02:00:00	0.563517	3
						2013-08-05 03:00:00	0.563643	2.9
						2013-08-05 04:00:00	0.563769	2.8
						2013-08-05 05:00:00	0.563769	2.7
						2013-08-05 06:00:00	0.564021	2.6
						2013-08-05 07:00:00	0.564146	2.5
						2013-08-05 08:00:00	0.564146	2.5
						2013-08-05 09:00:00	0.564146	2.4
						2013-08-05 10:00:00	0.564146	2.5
						2013-08-05 11:00:00	0.564146	2.5
						2013-08-05 12:00:00	0.564021	2.7
						2013-08-05 13:00:00	0.564021	2.8
						2013-08-05 14:00:00	0.563769	3
						2013-08-05 15:00:00	0.563517	3.2
						2013-08-05 16:00:00	0.563266	3.4
						2013-08-05 17:00:00	0.563266	3.6
						2013-08-05 18:00:00	0.563141	3.8
						2013-08-05 19:00:00	0.563015	4
						2013-08-05 20:00:00	0.562765	4.1
						2013-08-05 21:00:00	0.562389	4.2
						2013-08-05 22:00:00	0.562264	4.2
						2013-08-05 23:00:00	0.562014	4.2
						2013-08-06	0.561889	4.1
						2013-08-06 01:00:00	0.562014	4
						2013-08-06 02:00:00	0.562139	3.8
						2013-08-06 03:00:00	0.562264	3.6
						2013-08-06 04:00:00	0.562389	3.4
						2013-08-06 05:00:00	0.562514	3.3
						2013-08-06 06:00:00	0.562765	3.1
						2013-08-06 07:00:00	0.563015	2.9
						2013-08-06 08:00:00	0.563141	2.8
						2013-08-06 09:00:00	0.563266	2.7
						2013-08-06 10:00:00	0.563517	2.8
						2013-08-06 11:00:00	0.563266	2.9
						2013-08-06 12:00:00	0.563141	3.1
						2013-08-06 13:00:00	0.562639	3.3
						2013-08-06 14:00:00	0.562389	3.6
						2013-08-06 15:00:00	0.562014	3.9
						2013-08-06 16:00:00	0.561515	4.1
						2013-08-06 17:00:00	0.561017	4.2
						2013-08-06 18:00:00	0.56052	4.4
						2013-08-06 19:00:00	0.560396	4.6
						2013-08-06 20:00:00	0.560272	4.7
						2013-08-06 21:00:00	0.560272	4.8
						2013-08-06 22:00:00	0.560148	4.7
						2013-08-06 23:00:00	0.560024	4.7
						2013-08-07	0.560148	4.6
						2013-08-07 01:00:00	0.560272	4.5
						2013-08-07 02:00:00	0.560396	4.4
						2013-08-07 03:00:00	0.560396	4.2
						2013-08-07 04:00:00	0.560769	4.1
						2013-08-07 05:00:00	0.560769	3.9
						2013-08-07 06:00:00	0.560893	3.8
						2013-08-07 07:00:00	0.561017	3.7
						2013-08-07 08:00:00	0.560893	3.6
						2013-08-07 09:00:00	0.561142	3.6
						2013-08-07 10:00:00	0.561142	3.6
						2013-08-07 11:00:00	0.561017	3.7
						2013-08-07 12:00:00	0.560893	3.8
						2013-08-07 13:00:00	0.560769	4
						2013-08-07 14:00:00	0.560272	4.2
						2013-08-07 15:00:00	0.5599	4.4
						2013-08-07 16:00:00	0.559529	4.6
						2013-08-07 17:00:00	0.559159	4.8
						2013-08-07 18:00:00	0.558788	5
						2013-08-07 19:00:00	0.558788	5
						2013-08-07 20:00:00	0.558542	5
						2013-08-07 21:00:00	0.558665	5
						2013-08-07 22:00:00	0.558665	4.9
						2013-08-07 23:00:00	0.558788	4.8
						2013-08-08	0.558912	4.7
						2013-08-08 01:00:00	0.558912	4.6
						2013-08-08 02:00:00	0.559035	4.6
						2013-08-08 03:00:00	0.559035	4.5
						2013-08-08 04:00:00	0.559035	4.4
						2013-08-08 05:00:00	0.559159	4.3
						2013-08-08 06:00:00	0.559282	4.1
						2013-08-08 07:00:00	0.559406	4
						2013-08-08 08:00:00	0.559406	3.9
						2013-08-08 09:00:00	0.559406	3.9
						2013-08-08 10:00:00	0.559529	3.8
						2013-08-08 11:00:00	0.559653	3.8
						2013-08-08 12:00:00	0.559529	3.8
						2013-08-08 13:00:00	0.559529	3.8
						2013-08-08 14:00:00	0.559529	3.8
						2013-08-08 15:00:00	0.559406	3.9
						2013-08-08 16:00:00	0.559282	3.9
						2013-08-08 17:00:00	0.559282	3.9
						2013-08-08 18:00:00	0.559282	4
						2013-08-08 19:00:00	0.559159	4
						2013-08-08 20:00:00	0.558912	4
						2013-08-08 21:00:00	0.558912	4
						2013-08-08 22:00:00	0.559035	4
						2013-08-08 23:00:00	0.558912	3.9
						2013-08-09	0.558788	3.8
						2013-08-09 01:00:00	0.559035	3.7
						2013-08-09 02:00:00	0.559035	3.6
						2013-08-09 03:00:00	0.559159	3.4
						2013-08-09 04:00:00	0.559282	3.3
						2013-08-09 05:00:00	0.559529	3.1
						2013-08-09 06:00:00	0.559653	3
						2013-08-09 07:00:00	0.559777	2.8
						2013-08-09 08:00:00	0.5599	2.8
						2013-08-09 09:00:00	0.5599	2.7
						2013-08-09 10:00:00	0.560024	2.7
						2013-08-09 11:00:00	0.560024	2.7
						2013-08-09 12:00:00	0.5599	2.8
						2013-08-09 13:00:00	0.5599	2.9
						2013-08-09 14:00:00	0.559777	3.1
						2013-08-09 15:00:00	0.559653	3.2
						2013-08-09 16:00:00	0.559529	3.3
						2013-08-09 17:00:00	0.559406	3.3
						2013-08-09 18:00:00	0.559159	3.5
						2013-08-09 19:00:00	0.559282	3.5
						2013-08-09 20:00:00	0.559159	3.6
						2013-08-09 21:00:00	0.558912	3.6
						2013-08-09 22:00:00	0.558788	3.6
						2013-08-09 23:00:00	0.558665	3.6
						2013-08-10	0.558788	3.5
						2013-08-10 01:00:00	0.558788	3.4
						2013-08-10 02:00:00	0.558912	3.2
						2013-08-10 03:00:00	0.559035	3
						2013-08-10 04:00:00	0.559282	2.9
						2013-08-10 05:00:00	0.559282	2.7
						2013-08-10 06:00:00	0.559529	2.6
						2013-08-10 07:00:00	0.559529	2.4
						2013-08-10 08:00:00	0.559777	2.3
						2013-08-10 09:00:00	0.5599	2.3
						2013-08-10 10:00:00	0.5599	2.3
						2013-08-10 11:00:00	0.560024	2.4
						2013-08-10 12:00:00	0.560024	2.5
						2013-08-10 13:00:00	0.5599	2.8
						2013-08-10 14:00:00	0.559529	2.9
						2013-08-10 15:00:00	0.559282	3.2
						2013-08-10 16:00:00	0.558912	3.3
						2013-08-10 17:00:00	0.558788	3.5
						2013-08-10 18:00:00	0.558296	3.7
						2013-08-10 19:00:00	0.55805	3.9
						2013-08-10 20:00:00	0.557681	4
						2013-08-10 21:00:00	0.557681	4.1
						2013-08-10 22:00:00	0.557558	4.1
						2013-08-10 23:00:00	0.557436	4.1
						2013-08-11	0.557313	4
						2013-08-11 01:00:00	0.557313	3.9
						2013-08-11 02:00:00	0.557436	3.8
						2013-08-11 03:00:00	0.557436	3.6
						2013-08-11 04:00:00	0.557558	3.5
						2013-08-11 05:00:00	0.557558	3.3
						2013-08-11 06:00:00	0.557927	3.2
						2013-08-11 07:00:00	0.557804	3.2
						2013-08-11 08:00:00	0.557804	3.1
						2013-08-11 09:00:00	0.557804	3.1
						2013-08-11 10:00:00	0.557804	3.1
						2013-08-11 11:00:00	0.557804	3.2
						2013-08-11 12:00:00	0.557558	3.3
						2013-08-11 13:00:00	0.557436	3.4
						2013-08-11 14:00:00	0.557313	3.5
						2013-08-11 15:00:00	0.557068	3.7
						2013-08-11 16:00:00	0.556946	3.9
						2013-08-11 17:00:00	0.556701	4.1
						2013-08-11 18:00:00	0.556334	4.2
						2013-08-11 19:00:00	0.55609	4.3
						2013-08-11 20:00:00	0.55609	4.4
						2013-08-11 21:00:00	0.555968	4.4
						2013-08-11 22:00:00	0.555846	4.3
						2013-08-11 23:00:00	0.555846	4.3
						2013-08-12	0.555846	4.3
						2013-08-12 01:00:00	0.555968	4.2
						2013-08-12 02:00:00	0.55609	4.1
						2013-08-12 03:00:00	0.55609	4
						2013-08-12 04:00:00	0.55609	3.9
						2013-08-12 05:00:00	0.556212	3.7
						2013-08-12 06:00:00	0.556456	3.5
						2013-08-12 07:00:00	0.556456	3.4
						2013-08-12 08:00:00	0.556701	3.3
						2013-08-12 09:00:00	0.556823	3.2
						2013-08-12 10:00:00	0.556823	3.2
						2013-08-12 11:00:00	0.556579	3.2
						2013-08-12 12:00:00	0.556579	3.3
						2013-08-12 13:00:00	0.556579	3.5
						2013-08-12 14:00:00	0.556579	3.6
						2013-08-12 15:00:00	0.556212	3.7
						2013-08-12 16:00:00	0.55609	3.9
						2013-08-12 17:00:00	0.555846	4
						2013-08-12 18:00:00	0.555846	4
						2013-08-12 19:00:00	0.555724	4
						2013-08-12 20:00:00	0.555846	4
						2013-08-12 21:00:00	0.555724	4
						2013-08-12 22:00:00	0.555846	3.9
						2013-08-12 23:00:00	0.555968	3.8
						2013-08-13	0.555968	3.7
						2013-08-13 01:00:00	0.556212	3.5
						2013-08-13 02:00:00	0.556334	3.4
						2013-08-13 03:00:00	0.556579	3.2
						2013-08-13 04:00:00	0.556701	3
						2013-08-13 05:00:00	0.556946	2.8
						2013-08-13 06:00:00	0.557068	2.7
						2013-08-13 07:00:00	0.557191	2.5
						2013-08-13 08:00:00	0.557313	2.4
						2013-08-13 09:00:00	0.557681	2.3
						2013-08-13 10:00:00	0.557804	2.3
						2013-08-13 11:00:00	0.557436	2.5
						2013-08-13 12:00:00	0.557313	2.7
						2013-08-13 13:00:00	0.557068	2.8
						2013-08-13 14:00:00	0.556946	3
						2013-08-13 15:00:00	0.556701	3.1
						2013-08-13 16:00:00	0.556456	3.2
						2013-08-13 17:00:00	0.556334	3.3
						2013-08-13 18:00:00	0.556212	3.4
						2013-08-13 19:00:00	0.55609	3.4
						2013-08-13 20:00:00	0.555968	3.4
						2013-08-13 21:00:00	0.555846	3.3
						2013-08-13 22:00:00	0.555968	3.3
						2013-08-13 23:00:00	0.555968	3.2
						2013-08-14	0.55609	3.1
						2013-08-14 01:00:00	0.556334	3
						2013-08-14 02:00:00	0.556334	3
						2013-08-14 03:00:00	0.556579	2.8
						2013-08-14 04:00:00	0.556456	2.7
						2013-08-14 05:00:00	0.556579	2.5
						2013-08-14 06:00:00	0.556701	2.4
						2013-08-14 07:00:00	0.556946	2.3
						2013-08-14 08:00:00	0.557068	2.2
						2013-08-14 09:00:00	0.557191	2.1
						2013-08-14 10:00:00	0.557191	2.1
						2013-08-14 11:00:00	0.557313	2.2
						2013-08-14 12:00:00	0.557191	2.3
						2013-08-14 13:00:00	0.557068	2.4
						2013-08-14 14:00:00	0.557068	2.4
						2013-08-14 15:00:00	0.557068	2.5
						2013-08-14 16:00:00	0.556946	2.5
						2013-08-14 17:00:00	0.557068	2.6
						2013-08-14 18:00:00	0.557191	2.6
						2013-08-14 19:00:00	0.557191	2.6
						2013-08-14 20:00:00	0.557068	2.7
						2013-08-14 21:00:00	0.557804	2.6
						2013-08-14 22:00:00	0.559035	2.6
						2013-08-14 23:00:00	0.559653	2.6
						2013-08-15	0.559653	2.5
						2013-08-15 01:00:00	0.559653	2.5
						2013-08-15 02:00:00	0.559529	2.4
						2013-08-15 03:00:00	0.559529	2.4
						2013-08-15 04:00:00	0.559529	2.3
						2013-08-15 05:00:00	0.559529	2.3
						2013-08-15 06:00:00	0.559529	2.2
						2013-08-15 07:00:00	0.559777	2.2
						2013-08-15 08:00:00	0.559777	2.1
						2013-08-15 09:00:00	0.559777	2.1
						2013-08-15 10:00:00	0.560024	2.1
						2013-08-15 11:00:00	0.560024	2.1
						2013-08-15 12:00:00	0.560024	2.1
						2013-08-15 13:00:00	0.560024	2.1
						2013-08-15 14:00:00	0.560024	2.2
						2013-08-15 15:00:00	0.560024	2.3
						2013-08-15 16:00:00	0.5599	2.3
						2013-08-15 17:00:00	0.5599	2.3
						2013-08-15 18:00:00	0.5599	2.3
						2013-08-15 19:00:00	0.5599	2.2
						2013-08-15 20:00:00	0.5599	2.2
						2013-08-15 21:00:00	0.559777	2.1
						2013-08-15 22:00:00	0.5599	2
						2013-08-15 23:00:00	0.5599	1.9
						2013-08-16	0.560148	1.8
						2013-08-16 01:00:00	0.560024	1.7
						2013-08-16 02:00:00	0.560024	1.6
						2013-08-16 03:00:00	0.560148	1.5
						2013-08-16 04:00:00	0.560272	1.5
						2013-08-16 05:00:00	0.560148	1.4
						2013-08-16 06:00:00	0.560272	1.3
						2013-08-16 07:00:00	0.560148	1.3
						2013-08-16 08:00:00	0.560396	1.2
						2013-08-16 09:00:00	0.560396	1.2
						2013-08-16 10:00:00	0.560644	1.2
						2013-08-16 11:00:00	0.560769	1.1
						2013-08-16 12:00:00	0.560893	1.1
						2013-08-16 13:00:00	0.561017	1.1
						2013-08-16 14:00:00	0.561017	1.1
						2013-08-16 15:00:00	0.561017	1.1
						2013-08-16 16:00:00	0.561266	1.1
						2013-08-16 17:00:00	0.561266	1.1
						2013-08-16 18:00:00	0.561142	1.1
						2013-08-16 19:00:00	0.561266	1.1
						2013-08-16 20:00:00	0.561142	1.2
						2013-08-16 21:00:00	0.561142	1.2
						2013-08-16 22:00:00	0.561142	1.2
						2013-08-16 23:00:00	0.561266	1.1
						2013-08-17	0.561266	1.1
						2013-08-17 01:00:00	0.561017	1.1
						2013-08-17 02:00:00	0.561142	1.1
						2013-08-17 03:00:00	0.561142	1
						2013-08-17 04:00:00	0.561142	1
						2013-08-17 05:00:00	0.561017	1
						2013-08-17 06:00:00	0.561017	0.9
						2013-08-17 07:00:00	0.561017	0.9
						2013-08-17 08:00:00	0.560893	0.9
						2013-08-17 09:00:00	0.561017	0.9
						2013-08-17 10:00:00	0.561017	0.9
						2013-08-17 11:00:00	0.561017	0.9
						2013-08-17 12:00:00	0.560893	0.9
						2013-08-17 13:00:00	0.560893	1
						2013-08-17 14:00:00	0.561017	1
						2013-08-17 15:00:00	0.560769	1.1
						2013-08-17 16:00:00	0.560769	1.2
						2013-08-17 17:00:00	0.560644	1.2
						2013-08-17 18:00:00	0.560644	1.3
						2013-08-17 19:00:00	0.560644	1.3
						2013-08-17 20:00:00	0.56052	1.3
						2013-08-17 21:00:00	0.560396	1.3
						2013-08-17 22:00:00	0.560272	1.4
						2013-08-17 23:00:00	0.560396	1.3
						2013-08-18	0.560644	1.3
						2013-08-18 01:00:00	0.560769	1.3
						2013-08-18 02:00:00	0.560893	1.2
						2013-08-18 03:00:00	0.560769	1.2
						2013-08-18 04:00:00	0.560893	1.2
						2013-08-18 05:00:00	0.560893	1.1
						2013-08-18 06:00:00	0.561017	1.1
						2013-08-18 07:00:00	0.561017	1
						2013-08-18 08:00:00	0.561017	1
						2013-08-18 09:00:00	0.561142	1
						2013-08-18 10:00:00	0.561391	1
						2013-08-18 11:00:00	0.561391	1
						2013-08-18 12:00:00	0.561266	1
						2013-08-18 13:00:00	0.561266	1.1
						2013-08-18 14:00:00	0.561266	1.2
						2013-08-18 15:00:00	0.561142	1.3
						2013-08-18 16:00:00	0.561017	1.4
						2013-08-18 17:00:00	0.561017	1.6
						2013-08-18 18:00:00	0.560893	1.7
						2013-08-18 19:00:00	0.560644	1.9
						2013-08-18 20:00:00	0.560644	2
						2013-08-18 21:00:00	0.560396	2
						2013-08-18 22:00:00	0.560396	2.1
						2013-08-18 23:00:00	0.560396	2
						2013-08-19	0.560396	2
						2013-08-19 01:00:00	0.560272	2
						2013-08-19 02:00:00	0.56052	1.9
						2013-08-19 03:00:00	0.560396	1.8
						2013-08-19 04:00:00	0.56052	1.7
						2013-08-19 05:00:00	0.56052	1.7
						2013-08-19 06:00:00	0.560644	1.6
						2013-08-19 07:00:00	0.560644	1.5
						2013-08-19 08:00:00	0.560769	1.5
						2013-08-19 09:00:00	0.560893	1.4
						2013-08-19 10:00:00	0.560769	1.4
						2013-08-19 11:00:00	0.560893	1.5
						2013-08-19 12:00:00	0.560893	1.5
						2013-08-19 13:00:00	0.560893	1.6
						2013-08-19 14:00:00	0.560644	1.8
						2013-08-19 15:00:00	0.560769	1.9
						2013-08-19 16:00:00	0.560644	2
						2013-08-19 17:00:00	0.56052	2.2
						2013-08-19 18:00:00	0.560272	2.3
						2013-08-19 19:00:00	0.560148	2.5
						2013-08-19 20:00:00	0.5599	2.5
						2013-08-19 21:00:00	0.5599	2.6
						2013-08-19 22:00:00	0.5599	2.6
						2013-08-19 23:00:00	0.5599	2.6
						2013-08-20	0.5599	2.5
						2013-08-20 01:00:00	0.5599	2.5
						2013-08-20 02:00:00	0.560148	2.4
						2013-08-20 03:00:00	0.560396	2.4
						2013-08-20 04:00:00	0.560893	2.3
						2013-08-20 05:00:00	0.560893	2.3
						2013-08-20 06:00:00	0.561765	2.3
						2013-08-20 07:00:00	0.563141	2.2
						2013-08-20 08:00:00	0.564777	2.2
						2013-08-20 09:00:00	0.566298	2.1
						2013-08-20 10:00:00	0.568342	2.1
						2013-08-20 11:00:00	0.569758	2.1
						2013-08-20 12:00:00	0.570275	2.1
						2013-08-20 13:00:00	0.570146	2.1
						2013-08-20 14:00:00	0.570017	2.2
						2013-08-20 15:00:00	0.569887	2.2
						2013-08-20 16:00:00	0.569629	2.2
						2013-08-20 17:00:00	0.569113	2.2
						2013-08-20 18:00:00	0.568599	2.3
						2013-08-20 19:00:00	0.568086	2.3
						2013-08-20 20:00:00	0.567957	2.3
						2013-08-20 21:00:00	0.567701	2.3
						2013-08-20 22:00:00	0.567573	2.3
						2013-08-20 23:00:00	0.567318	2.3
						2013-08-21	0.567446	2.2
						2013-08-21 01:00:00	0.567318	2.2
						2013-08-21 02:00:00	0.567318	2.1
						2013-08-21 03:00:00	0.567318	2
						2013-08-21 04:00:00	0.567318	2
						2013-08-21 05:00:00	0.567318	1.9
						2013-08-21 06:00:00	0.567446	1.8
						2013-08-21 07:00:00	0.567446	1.8
						2013-08-21 08:00:00	0.567446	1.7
						2013-08-21 09:00:00	0.567573	1.6
						2013-08-21 10:00:00	0.567573	1.6
						2013-08-21 11:00:00	0.567446	1.6
						2013-08-21 12:00:00	0.567318	1.6
						2013-08-21 13:00:00	0.567062	1.7
						2013-08-21 14:00:00	0.566935	1.7
						2013-08-21 15:00:00	0.56668	1.8
						2013-08-21 16:00:00	0.566171	1.9
						2013-08-21 17:00:00	0.56579	2
						2013-08-21 18:00:00	0.565663	2.1
						2013-08-21 19:00:00	0.565283	2.1
						2013-08-21 20:00:00	0.565157	2.1
						2013-08-21 21:00:00	0.564904	2.1
						2013-08-21 22:00:00	0.564904	2.1
						2013-08-21 23:00:00	0.564777	2
						2013-08-22	0.564525	1.9
						2013-08-22 01:00:00	0.564525	1.8
						2013-08-22 02:00:00	0.564399	1.8
						2013-08-22 03:00:00	0.564525	1.7
						2013-08-22 04:00:00	0.564273	1.6
						2013-08-22 05:00:00	0.564399	1.5
						2013-08-22 06:00:00	0.564146	1.4
						2013-08-22 07:00:00	0.564146	1.4
						2013-08-22 08:00:00	0.564146	1.3
						2013-08-22 09:00:00	0.564021	1.3
						2013-08-22 10:00:00	0.563895	1.2
						2013-08-22 11:00:00	0.563895	1.2
						2013-08-22 12:00:00	0.564146	1.1
						2013-08-22 13:00:00	0.564021	1.1
						2013-08-22 14:00:00	0.564021	1
						2013-08-22 15:00:00	0.564021	1
						2013-08-22 16:00:00	0.564021	1
						2013-08-22 17:00:00	0.563895	1
						2013-08-22 18:00:00	0.563769	1.1
						2013-08-22 19:00:00	0.563517	1.1
						2013-08-22 20:00:00	0.563266	1.1
						2013-08-22 21:00:00	0.563266	1.1
						2013-08-22 22:00:00	0.563015	1.1
						2013-08-22 23:00:00	0.56289	1.1
						2013-08-23	0.562639	1.1
						2013-08-23 01:00:00	0.562514	1
						2013-08-23 02:00:00	0.562264	1
						2013-08-23 03:00:00	0.562139	1
						2013-08-23 04:00:00	0.562014	0.9
						2013-08-23 05:00:00	0.56164	0.9
						2013-08-23 06:00:00	0.561266	0.9
						2013-08-23 07:00:00	0.560893	0.8
						2013-08-23 08:00:00	0.560769	0.8
						2013-08-23 09:00:00	0.560893	0.8
						2013-08-23 10:00:00	0.560769	0.7
						2013-08-23 11:00:00	0.560893	0.7
						2013-08-23 12:00:00	0.561017	0.7
						2013-08-23 13:00:00	0.561142	0.7
						2013-08-23 14:00:00	0.561266	0.7
						2013-08-23 15:00:00	0.561266	0.6
						2013-08-23 16:00:00	0.56164	0.6
						2013-08-23 17:00:00	0.56164	0.6
						2013-08-23 18:00:00	0.561889	0.6
						2013-08-23 19:00:00	0.561889	0.6
						2013-08-23 20:00:00	0.562014	0.6
						2013-08-23 21:00:00	0.562014	0.6
						2013-08-23 22:00:00	0.562014	0.6
						2013-08-23 23:00:00	0.562139	0.6
						2013-08-24	0.562264	0.7
						2013-08-24 01:00:00	0.562639	0.7
						2013-08-24 02:00:00	0.562639	0.8
						2013-08-24 03:00:00	0.562765	0.8
						2013-08-24 04:00:00	0.562639	0.9
						2013-08-24 05:00:00	0.56289	1
						2013-08-24 06:00:00	0.562765	1
						2013-08-24 07:00:00	0.56289	1.1
						2013-08-24 08:00:00	0.562765	1.1
						2013-08-24 09:00:00	0.562765	1.1
						2013-08-24 10:00:00	0.562765	1.2
						2013-08-24 11:00:00	0.56289	1.2
						2013-08-24 12:00:00	0.563015	1.3
						2013-08-24 13:00:00	0.56289	1.3
						2013-08-24 14:00:00	0.56289	1.4
						2013-08-24 15:00:00	0.562639	1.6
						2013-08-24 16:00:00	0.562639	1.7
						2013-08-24 17:00:00	0.562389	1.8
						2013-08-24 18:00:00	0.562389	1.8
						2013-08-24 19:00:00	0.562264	1.9
						2013-08-24 20:00:00	0.562139	1.9
						2013-08-24 21:00:00	0.562014	1.9
						2013-08-24 22:00:00	0.562014	1.9
						2013-08-24 23:00:00	0.562014	1.8
						2013-08-25	0.562014	1.7
						2013-08-25 01:00:00	0.562014	1.6
						2013-08-25 02:00:00	0.561889	1.6
						2013-08-25 03:00:00	0.561889	1.5
						2013-08-25 04:00:00	0.561889	1.4
						2013-08-25 05:00:00	0.561765	1.3
						2013-08-25 06:00:00	0.561765	1.3
						2013-08-25 07:00:00	0.56164	1.2
						2013-08-25 08:00:00	0.561765	1.2
						2013-08-25 09:00:00	0.56164	1.1
						2013-08-25 10:00:00	0.561765	1.1
						2013-08-25 11:00:00	0.561889	1
						2013-08-25 12:00:00	0.562139	1
						2013-08-25 13:00:00	0.562264	1
						2013-08-25 14:00:00	0.562389	0.9
						2013-08-25 15:00:00	0.562514	0.9
						2013-08-25 16:00:00	0.562514	1
						2013-08-25 17:00:00	0.562389	1.1
						2013-08-25 18:00:00	0.562389	1.2
						2013-08-25 19:00:00	0.562139	1.3
						2013-08-25 20:00:00	0.562139	1.3
						2013-08-25 21:00:00	0.562014	1.4
						2013-08-25 22:00:00	0.561889	1.4
						2013-08-25 23:00:00	0.561765	1.4
						2013-08-26	0.56164	1.3
						2013-08-26 01:00:00	0.56164	1.3
						2013-08-26 02:00:00	0.561391	1.2
						2013-08-26 03:00:00	0.561391	1.2
						2013-08-26 04:00:00	0.561266	1.1
						2013-08-26 05:00:00	0.561266	1.1
						2013-08-26 06:00:00	0.561142	1
						2013-08-26 07:00:00	0.561017	1
						2013-08-26 08:00:00	0.561017	0.9
						2013-08-26 09:00:00	0.561142	0.9
						2013-08-26 10:00:00	0.561391	0.9
						2013-08-26 11:00:00	0.561515	0.8
						2013-08-26 12:00:00	0.561391	0.8
						2013-08-26 13:00:00	0.56164	0.8
						2013-08-26 14:00:00	0.561889	0.7
						2013-08-26 15:00:00	0.562014	0.7
						2013-08-26 16:00:00	0.562264	0.7
						2013-08-26 17:00:00	0.562264	0.7
						2013-08-26 18:00:00	0.562514	0.7
						2013-08-26 19:00:00	0.562514	0.8
						2013-08-26 20:00:00	0.562389	0.9
						2013-08-26 21:00:00	0.562389	1
						2013-08-26 22:00:00	0.562264	1
						2013-08-26 23:00:00	0.562389	1.1
						2013-08-27	0.562389	1.1
						2013-08-27 01:00:00	0.562389	1
						2013-08-27 02:00:00	0.562389	1
						2013-08-27 03:00:00	0.562514	1
						2013-08-27 04:00:00	0.562389	0.9
						2013-08-27 05:00:00	0.562389	0.9
						2013-08-27 06:00:00	0.562514	0.9
						2013-08-27 07:00:00	0.562514	0.8
						2013-08-27 08:00:00	0.562639	0.8
						2013-08-27 09:00:00	0.562765	0.8
						2013-08-27 10:00:00	0.56289	0.7
						2013-08-27 11:00:00	0.56289	0.8
						2013-08-27 12:00:00	0.56289	0.8
						2013-08-27 13:00:00	0.563141	1
						2013-08-27 14:00:00	0.56289	1.1
						2013-08-27 15:00:00	0.562765	1.3
						2013-08-27 16:00:00	0.562639	1.4
						2013-08-27 17:00:00	0.562389	1.6
						2013-08-27 18:00:00	0.562264	1.7
						2013-08-27 19:00:00	0.562264	1.8
						2013-08-27 20:00:00	0.562014	1.8
						2013-08-27 21:00:00	0.562014	1.9
						2013-08-27 22:00:00	0.562014	1.8
						2013-08-27 23:00:00	0.561889	1.8
						2013-08-28	0.562014	1.7
						2013-08-28 01:00:00	0.562014	1.7
						2013-08-28 02:00:00	0.562014	1.6
						2013-08-28 03:00:00	0.562014	1.5
						2013-08-28 04:00:00	0.562139	1.4
						2013-08-28 05:00:00	0.562264	1.4
						2013-08-28 06:00:00	0.562139	1.3
						2013-08-28 07:00:00	0.562264	1.3
						2013-08-28 08:00:00	0.562389	1.2
						2013-08-28 09:00:00	0.562389	1.2
						2013-08-28 10:00:00	0.562514	1.1
						2013-08-28 11:00:00	0.562639	1.1
						2013-08-28 12:00:00	0.562639	1.1
						2013-08-28 13:00:00	0.562765	1.1
						2013-08-28 14:00:00	0.562765	1.1
						2013-08-28 15:00:00	0.562639	1.1
						2013-08-28 16:00:00	0.562639	1.2
						2013-08-28 17:00:00	0.562639	1.2
						2013-08-28 18:00:00	0.562514	1.3
						2013-08-28 19:00:00	0.562514	1.3
						2013-08-28 20:00:00	0.562389	1.3
						2013-08-28 21:00:00	0.562514	1.3
						2013-08-28 22:00:00	0.562514	1.3
						2013-08-28 23:00:00	0.562389	1.2
						2013-08-29	0.562389	1.2
						2013-08-29 01:00:00	0.562389	1.1
						2013-08-29 02:00:00	0.562514	1.1
						2013-08-29 03:00:00	0.562514	1
						2013-08-29 04:00:00	0.562639	1
						2013-08-29 05:00:00	0.562765	1
						2013-08-29 06:00:00	0.56289	0.9
						2013-08-29 07:00:00	0.56289	0.9
						2013-08-29 08:00:00	0.563015	0.9
						2013-08-29 09:00:00	0.563015	0.9
						2013-08-29 10:00:00	0.563015	0.8
						2013-08-29 11:00:00	0.563141	0.8
						2013-08-29 12:00:00	0.563266	0.8
						2013-08-29 13:00:00	0.563392	0.8
						2013-08-29 14:00:00	0.563392	0.8
						2013-08-29 15:00:00	0.563266	0.9
						2013-08-29 16:00:00	0.563392	0.9
						2013-08-29 17:00:00	0.563266	1
						2013-08-29 18:00:00	0.563141	1
						2013-08-29 19:00:00	0.563141	1
						2013-08-29 20:00:00	0.563015	1.1
						2013-08-29 21:00:00	0.56289	1.1
						2013-08-29 22:00:00	0.562765	1.1
						2013-08-29 23:00:00	0.562765	1
						2013-08-30	0.562514	1
						2013-08-30 01:00:00	0.562639	0.9
						2013-08-30 02:00:00	0.562639	0.9
						2013-08-30 03:00:00	0.562639	0.9
						2013-08-30 04:00:00	0.562765	0.8
						2013-08-30 05:00:00	0.563015	0.8
						2013-08-30 06:00:00	0.563015	0.8
						2013-08-30 07:00:00	0.563141	0.8
						2013-08-30 08:00:00	0.563141	0.7
						2013-08-30 09:00:00	0.563141	0.7
						2013-08-30 10:00:00	0.563266	0.7
						2013-08-30 11:00:00	0.563266	0.7
						2013-08-30 12:00:00	0.563643	0.7
						2013-08-30 13:00:00	0.563769	0.6
						2013-08-30 14:00:00	0.563895	0.6
						2013-08-30 15:00:00	0.563895	0.6
						2013-08-30 16:00:00	0.563895	0.7
						2013-08-30 17:00:00	0.564021	0.7
						2013-08-30 18:00:00	0.564021	0.9
						2013-08-30 19:00:00	0.563895	0.9
						2013-08-30 20:00:00	0.564021	1
						2013-08-30 21:00:00	0.563895	1
						2013-08-30 22:00:00	0.563895	1
						2013-08-30 23:00:00	0.563895	1
						2013-08-31	0.563895	1
						2013-08-31 01:00:00	0.563895	0.9
						2013-08-31 02:00:00	0.564021	0.9
						2013-08-31 03:00:00	0.564021	0.8
						2013-08-31 04:00:00	0.564146	0.8
						2013-08-31 05:00:00	0.564273	0.8
						2013-08-31 06:00:00	0.564273	0.7
						2013-08-31 07:00:00	0.564399	0.7
						2013-08-31 08:00:00	0.564525	0.7
						2013-08-31 09:00:00	0.564525	0.7
						2013-08-31 10:00:00	0.564525	0.7
						2013-08-31 11:00:00	0.564525	0.7
						2013-08-31 12:00:00	0.564525	0.7
						2013-08-31 13:00:00	0.564651	0.7
						2013-08-31 14:00:00	0.564651	0.8
						2013-08-31 15:00:00	0.564525	0.9
						2013-08-31 16:00:00	0.564525	0.9
						2013-08-31 17:00:00	0.564525	1
						2013-08-31 18:00:00	0.564399	1.1
						2013-08-31 19:00:00	0.564399	1.1
						2013-08-31 20:00:00	0.564525	1.1
						2013-08-31 21:00:00	0.564525	1.1
						2013-08-31 22:00:00	0.564525	1.1
						2013-08-31 23:00:00	0.564525	1
						2013-09-01	0.564651	1
						2013-09-01 01:00:00	0.564525	1
						2013-09-01 02:00:00	0.564525	0.9
						2013-09-01 03:00:00	0.564399	0.9
						2013-09-01 04:00:00	0.564525	0.9
						2013-09-01 05:00:00	0.564399	0.8
						2013-09-01 06:00:00	0.564399	0.8
						2013-09-01 07:00:00	0.564525	0.8
						2013-09-01 08:00:00	0.564525	0.7
						2013-09-01 09:00:00	0.564399	0.7
						2013-09-01 10:00:00	0.564525	0.7
						2013-09-01 11:00:00	0.564525	0.7
						2013-09-01 12:00:00	0.564525	0.7
						2013-09-01 13:00:00	0.564777	0.7
						2013-09-01 14:00:00	0.564777	0.6
						2013-09-01 15:00:00	0.564777	0.7
						2013-09-01 16:00:00	0.564777	0.8
						2013-09-01 17:00:00	0.564651	0.9
						2013-09-01 18:00:00	0.564651	1
						2013-09-01 19:00:00	0.564777	1.1
						2013-09-01 20:00:00	0.564525	1.2
						2013-09-01 21:00:00	0.564525	1.2
						2013-09-01 22:00:00	0.564525	1.2
						2013-09-01 23:00:00	0.564525	1.2
						2013-09-02	0.564525	1.2
						2013-09-02 01:00:00	0.564525	1.1
						2013-09-02 02:00:00	0.564651	1.1
						2013-09-02 03:00:00	0.564651	1
						2013-09-02 04:00:00	0.564651	1
						2013-09-02 05:00:00	0.564651	1
						2013-09-02 06:00:00	0.564651	0.9
						2013-09-02 07:00:00	0.564651	0.9
						2013-09-02 08:00:00	0.564777	0.9
						2013-09-02 09:00:00	0.564651	0.8
						2013-09-02 10:00:00	0.564777	0.8
						2013-09-02 11:00:00	0.564904	0.8
						2013-09-02 12:00:00	0.564777	0.8
						2013-09-02 13:00:00	0.564904	0.8
						2013-09-02 14:00:00	0.56503	0.9
						2013-09-02 15:00:00	0.564904	0.9
						2013-09-02 16:00:00	0.564777	0.9
						2013-09-02 17:00:00	0.564904	1
						2013-09-02 18:00:00	0.564777	1
						2013-09-02 19:00:00	0.565157	1.1
						2013-09-02 20:00:00	0.565157	1.1
						2013-09-02 21:00:00	0.565283	1.1
						2013-09-02 22:00:00	0.56541	1.1
						2013-09-02 23:00:00	0.565536	1
						2013-09-03	0.565536	1
						2013-09-03 01:00:00	0.565536	1
						2013-09-03 02:00:00	0.565536	1
						2013-09-03 03:00:00	0.565536	0.9
						2013-09-03 04:00:00	0.565536	0.9
						2013-09-03 05:00:00	0.565663	0.9
						2013-09-03 06:00:00	0.565663	0.8
						2013-09-03 07:00:00	0.565663	0.8
						2013-09-03 08:00:00	0.565663	0.8
						2013-09-03 09:00:00	0.565663	0.7
						2013-09-03 10:00:00	0.565663	0.7
						2013-09-03 11:00:00	0.56579	0.7
						2013-09-03 12:00:00	0.566044	0.7
						2013-09-03 13:00:00	0.566171	0.7
						2013-09-03 14:00:00	0.56668	0.7
						2013-09-03 15:00:00	0.566807	0.7
						2013-09-03 16:00:00	0.56668	0.8
						2013-09-03 17:00:00	0.56668	0.8
						2013-09-03 18:00:00	0.566553	0.9
						2013-09-03 19:00:00	0.566425	1
						2013-09-03 20:00:00	0.566425	1
						2013-09-03 21:00:00	0.566425	1
						2013-09-03 22:00:00	0.566298	1
						2013-09-03 23:00:00	0.566171	1
						2013-09-04	0.566425	1
						2013-09-04 01:00:00	0.566425	1
						2013-09-04 02:00:00	0.566425	0.9
						2013-09-04 03:00:00	0.566425	0.9
						2013-09-04 04:00:00	0.566553	0.9
						2013-09-04 05:00:00	0.566553	0.9
						2013-09-04 06:00:00	0.566553	0.8
						2013-09-04 07:00:00	0.566553	0.8
						2013-09-04 08:00:00	0.566553	0.8
						2013-09-04 09:00:00	0.566553	0.7
						2013-09-04 10:00:00	0.56668	0.7
						2013-09-04 11:00:00	0.566807	0.7
						2013-09-04 12:00:00	0.566807	0.7
						2013-09-04 13:00:00	0.566935	0.8
						2013-09-04 14:00:00	0.566807	0.8
						2013-09-04 15:00:00	0.56668	0.9
						2013-09-04 16:00:00	0.56668	1.1
						2013-09-04 17:00:00	0.566425	1.2
						2013-09-04 18:00:00	0.566298	1.3
						2013-09-04 19:00:00	0.566298	1.4
						2013-09-04 20:00:00	0.566171	1.4
						2013-09-04 21:00:00	0.566044	1.4
						2013-09-04 22:00:00	0.566171	1.4
						2013-09-04 23:00:00	0.566044	1.4
						2013-09-05	0.566044	1.3
						2013-09-05 01:00:00	0.566171	1.2
						2013-09-05 02:00:00	0.566171	1.2
						2013-09-05 03:00:00	0.566171	1.2
						2013-09-05 04:00:00	0.566171	1.1
						2013-09-05 05:00:00	0.566171	1.1
						2013-09-05 06:00:00	0.566171	1
						2013-09-05 07:00:00	0.566044	1
						2013-09-05 08:00:00	0.566171	0.9
						2013-09-05 09:00:00	0.566298	0.9
						2013-09-05 10:00:00	0.566298	0.9
						2013-09-05 11:00:00	0.566425	0.8
						2013-09-05 12:00:00	0.566298	0.8
						2013-09-05 13:00:00	0.566553	0.8
						2013-09-05 14:00:00	0.566553	0.8
						2013-09-05 15:00:00	0.56668	0.8
						2013-09-05 16:00:00	0.56668	0.8
						2013-09-05 17:00:00	0.566553	0.9
						2013-09-05 18:00:00	0.566298	1
						2013-09-05 19:00:00	0.566298	1
						2013-09-05 20:00:00	0.566298	1.1
						2013-09-05 21:00:00	0.566171	1.1
						2013-09-05 22:00:00	0.566171	1.1
						2013-09-05 23:00:00	0.565917	1
						2013-09-06	0.565917	1
						2013-09-06 01:00:00	0.56579	1
						2013-09-06 02:00:00	0.56579	0.9
						2013-09-06 03:00:00	0.565663	0.9
						2013-09-06 04:00:00	0.565663	0.9
						2013-09-06 05:00:00	0.56541	0.8
						2013-09-06 06:00:00	0.565157	0.8
						2013-09-06 07:00:00	0.564904	0.8
						2013-09-06 08:00:00	0.562639	0.7
						2013-09-06 09:00:00	0.557927	0.7
						2013-09-06 10:00:00	0.557558	0.7
						2013-09-06 11:00:00	0.557436	0.7
						2013-09-06 12:00:00	0.557436	0.6
						2013-09-06 13:00:00	0.557558	0.6
						2013-09-06 14:00:00	0.557927	0.6
						2013-09-06 15:00:00	0.55805	0.6
						2013-09-06 16:00:00	0.558173	0.6
						2013-09-06 17:00:00	0.55805	0.6
						2013-09-06 18:00:00	0.55805	0.5
						2013-09-06 19:00:00	0.557927	0.5
						2013-09-06 20:00:00	0.557804	0.5
						2013-09-06 21:00:00	0.557558	0.5
						2013-09-06 22:00:00	0.557191	0.5
						2013-09-06 23:00:00	0.556823	0.5
						2013-09-07	0.556701	0.5
						2013-09-07 01:00:00	0.556579	0.5
						2013-09-07 02:00:00	0.556456	0.5
						2013-09-07 03:00:00	0.556456	0.5
						2013-09-07 04:00:00	0.556456	0.5
						2013-09-07 05:00:00	0.556334	0.5
						2013-09-07 06:00:00	0.556334	0.5
						2013-09-07 07:00:00	0.555968	0.5
						2013-09-07 08:00:00	0.555968	0.5
						2013-09-07 09:00:00	0.555968	0.5
						2013-09-07 10:00:00	0.555968	0.5
						2013-09-07 11:00:00	0.555968	0.5
						2013-09-07 12:00:00	0.55609	0.5
						2013-09-07 13:00:00	0.55609	0.5
						2013-09-07 14:00:00	0.55609	0.5
						2013-09-07 15:00:00	0.556212	0.5
						2013-09-07 16:00:00	0.556212	0.5
						2013-09-07 17:00:00	0.556334	0.5
						2013-09-07 18:00:00	0.556212	0.5
						2013-09-07 19:00:00	0.55609	0.5
						2013-09-07 20:00:00	0.55609	0.4
						2013-09-07 21:00:00	0.55609	0.4
						2013-09-07 22:00:00	0.555968	0.5
						2013-09-07 23:00:00	0.555968	0.5
						2013-09-08	0.555968	0.4
						2013-09-08 01:00:00	0.555724	0.5
						2013-09-08 02:00:00	0.55548	0.5
						2013-09-08 03:00:00	0.55548	0.5
						2013-09-08 04:00:00	0.555237	0.4
						2013-09-08 05:00:00	0.554994	0.4
						2013-09-08 06:00:00	0.554629	0.5
						2013-09-08 07:00:00	0.554386	0.4
						2013-09-08 08:00:00	0.554144	0.4
						2013-09-08 09:00:00	0.553902	0.4
						2013-09-08 10:00:00	0.55378	0.4
						2013-09-08 11:00:00	0.553538	0.4
						2013-09-08 12:00:00	0.553418	0.4
						2013-09-08 13:00:00	0.553176	0.4
						2013-09-08 14:00:00	0.553176	0.4
						2013-09-08 15:00:00	0.553176	0.4
						2013-09-08 16:00:00	0.553055	0.4
						2013-09-08 17:00:00	0.553176	0.4
						2013-09-08 18:00:00	0.553055	0.4
						2013-09-08 19:00:00	0.553055	0.4
						2013-09-08 20:00:00	0.552934	0.5
						2013-09-08 21:00:00	0.552934	0.4
						2013-09-08 22:00:00	0.552693	0.5
						2013-09-08 23:00:00	0.552572	0.5
						2013-09-09	0.552572	0.4
						2013-09-09 01:00:00	0.552452	0.4
						2013-09-09 02:00:00	0.552452	0.4
						2013-09-09 03:00:00	0.552331	0.5
						2013-09-09 04:00:00	0.55209	0.4
						2013-09-09 05:00:00	0.55209	0.4
						2013-09-09 06:00:00	0.55209	0.4
						2013-09-09 07:00:00	0.55197	0.4
						2013-09-09 08:00:00	0.55197	0.4
						2013-09-09 09:00:00	0.55185	0.4
						2013-09-09 10:00:00	0.55185	0.5
						2013-09-09 11:00:00	0.551729	0.5
						2013-09-09 12:00:00	0.55185	0.5
						2013-09-09 13:00:00	0.551609	0.4
						2013-09-09 14:00:00	0.551729	0.5
						2013-09-09 15:00:00	0.551489	0.4
						2013-09-09 16:00:00	0.551369	0.5
						2013-09-09 17:00:00	0.551369	0.4
						2013-09-09 18:00:00	0.551489	0.4
						2013-09-09 19:00:00	0.551369	0.4
						2013-09-09 20:00:00	0.551369	0.4
						2013-09-09 21:00:00	0.551129	0.5
						2013-09-09 22:00:00	0.551009	0.4
						2013-09-09 23:00:00	0.550889	0.5
						2013-09-10	0.550649	0.4
						2013-09-10 01:00:00	0.550649	0.5
						2013-09-10 02:00:00	0.550529	0.4
						2013-09-10 03:00:00	0.55029	0.4
						2013-09-10 04:00:00	0.55017	0.4
						2013-09-10 05:00:00	0.549811	0.4
						2013-09-10 06:00:00	0.549692	0.4
						2013-09-10 07:00:00	0.549453	0.5
						2013-09-10 08:00:00	0.549334	0.4
						2013-09-10 09:00:00	0.548857	0.4
						2013-09-10 10:00:00	0.54838	0.4
						2013-09-10 11:00:00	0.548142	0.5
						2013-09-10 12:00:00	0.548023	0.4
						2013-09-10 13:00:00	0.547904	0.5
						2013-09-10 14:00:00	0.547786	0.5
						2013-09-10 15:00:00	0.547786	0.5
						2013-09-10 16:00:00	0.547667	0.5
						2013-09-10 17:00:00	0.547667	0.4
						2013-09-10 18:00:00	0.547667	0.4
						2013-09-10 19:00:00	0.547429	0.4
						2013-09-10 20:00:00	0.547311	0.4
						2013-09-10 21:00:00	0.547073	0.5
						2013-09-10 22:00:00	0.547073	0.4
						2013-09-10 23:00:00	0.546836	0.4
						2013-09-11	0.546836	0.4
						2013-09-11 01:00:00	0.546718	0.4
						2013-09-11 02:00:00	0.546481	0.4
						2013-09-11 03:00:00	0.546244	0.4
						2013-09-11 04:00:00	0.546126	0.4
						2013-09-11 05:00:00	0.545889	0.4
						2013-09-11 06:00:00	0.545535	0.4
						2013-09-11 07:00:00	0.545299	0.4
						2013-09-11 08:00:00	0.545063	0.4
						2013-09-11 09:00:00	0.544945	0.5
						2013-09-11 10:00:00	0.544591	0.4
						2013-09-11 11:00:00	0.544473	0.5
						2013-09-11 12:00:00	0.544356	0.4
						2013-09-11 13:00:00	0.544002	0.4
						2013-09-11 14:00:00	0.544002	0.4
						2013-09-11 15:00:00	0.543767	0.4
						2013-09-11 16:00:00	0.54365	0.5
						2013-09-11 17:00:00	0.543532	0.4
						2013-09-11 18:00:00	0.543415	0.4
						2013-09-11 19:00:00	0.54318	0.4
						2013-09-11 20:00:00	0.543062	0.4
						2013-09-11 21:00:00	0.542828	0.4
						2013-09-11 22:00:00	0.54271	0.4
						2013-09-11 23:00:00	0.542476	0.4
						2013-09-12	0.542241	0.4
						2013-09-12 01:00:00	0.539087	0.4
						2013-09-12 02:00:00	0.526265	0.4
						2013-09-12 03:00:00	0.525	0.5
						2013-09-12 04:00:00	0.524195	0.4
						2013-09-12 05:00:00	0.523619	0.5
						2013-09-12 06:00:00	0.523159	0.5
						2013-09-12 07:00:00	0.522584	0.4
						2013-09-12 08:00:00	0.522124	0.5
						2013-09-12 09:00:00	0.521778	0.4
						2013-09-12 10:00:00	0.521318	0.4
						2013-09-12 11:00:00	0.521088	0.4
						2013-09-12 12:00:00	0.520742	0.5
						2013-09-12 13:00:00	0.520512	0.4
						2013-09-12 14:00:00	0.520166	0.4
						2013-09-12 15:00:00	0.520051	0.4
						2013-09-12 16:00:00	0.51982	0.4
						2013-09-12 17:00:00	0.51959	0.5
						2013-09-12 18:00:00	0.519359	0.4
						2013-09-12 19:00:00	0.519129	0.4
						2013-09-12 20:00:00	0.518783	0.4
						2013-09-12 21:00:00	0.518552	0.4
						2013-09-12 22:00:00	0.518206	0.4
						2013-09-12 23:00:00	0.517975	0.4
						2013-09-13	0.517513	0.5
						2013-09-13 01:00:00	0.517166	0.4
						2013-09-13 02:00:00	0.51682	0.4
						2013-09-13 03:00:00	0.516357	0.5
						2013-09-13 04:00:00	0.515895	0.5
						2013-09-13 05:00:00	0.515432	0.4
						2013-09-13 06:00:00	0.514968	0.4
						2013-09-13 07:00:00	0.514505	0.5
						2013-09-13 08:00:00	0.514041	0.4
						2013-09-13 09:00:00	0.513577	0.4
						2013-09-13 10:00:00	0.513112	0.4
						2013-09-13 11:00:00	0.512763	0.5
						2013-09-13 12:00:00	0.512531	0.4
						2013-09-13 13:00:00	0.512182	0.5
						2013-09-13 14:00:00	0.512065	0.5
						2013-09-13 15:00:00	0.511949	0.4
						2013-09-13 16:00:00	0.511716	0.4
						2013-09-13 17:00:00	0.511483	0.4
						2013-09-13 18:00:00	0.511367	0.4
						2013-09-13 19:00:00	0.511017	0.4
						2013-09-13 20:00:00	0.5109	0.4
						2013-09-13 21:00:00	0.510667	0.4
						2013-09-13 22:00:00	0.510317	0.4
						2013-09-13 23:00:00	0.510083	0.4
						2013-09-14	0.509733	0.4
						2013-09-14 01:00:00	0.509265	0.4
						2013-09-14 02:00:00	0.508562	0.4
						2013-09-14 03:00:00	0.507858	0.4
						2013-09-14 04:00:00	0.507153	0.4
						2013-09-14 05:00:00	0.506565	0.4
						2013-09-14 06:00:00	0.506094	0.4
						2013-09-14 07:00:00	0.505504	0.4
						2013-09-14 08:00:00	0.504913	0.4
						2013-09-14 09:00:00	0.504203	0.4
						2013-09-14 10:00:00	0.503848	0.4
						2013-09-14 11:00:00	0.503492	0.4
						2013-09-14 12:00:00	0.503136	0.4
						2013-09-14 13:00:00	0.502898	0.4
						2013-09-14 14:00:00	0.50266	0.4
						2013-09-14 15:00:00	0.502422	0.4
						2013-09-14 16:00:00	0.502303	0.4
						2013-09-14 17:00:00	0.502065	0.4
						2013-09-14 18:00:00	0.502065	0.4
						2013-09-14 19:00:00	0.501946	0.4
						2013-09-14 20:00:00	0.501707	0.4
						2013-09-14 21:00:00	0.501588	0.4
						2013-09-14 22:00:00	0.501349	0.4
						2013-09-14 23:00:00	0.50111	0.4
						2013-09-15	0.500871	0.4
						2013-09-15 01:00:00	0.500632	0.4
						2013-09-15 02:00:00	0.500392	0.4
						2013-09-15 03:00:00	0.500033	0.4
						2013-09-15 04:00:00	0.499673	0.4
						2013-09-15 05:00:00	0.499312	0.4
						2013-09-15 06:00:00	0.498952	0.4
						2013-09-15 07:00:00	0.498591	0.4
						2013-09-15 08:00:00	0.498108	0.4
						2013-09-15 09:00:00	0.497746	0.4
						2013-09-15 10:00:00	0.497505	0.4
						2013-09-15 11:00:00	0.497263	0.4
						2013-09-15 12:00:00	0.497142	0.4
						2013-09-15 13:00:00	0.497021	0.4
						2013-09-15 14:00:00	0.496778	0.4
						2013-09-15 15:00:00	0.496657	0.5
						2013-09-15 16:00:00	0.496536	0.4
						2013-09-15 17:00:00	0.496415	0.4
						2013-09-15 18:00:00	0.496293	0.4
						2013-09-15 19:00:00	0.496172	0.4
						2013-09-15 20:00:00	0.49605	0.4
						2013-09-15 21:00:00	0.495807	0.4
						2013-09-15 22:00:00	0.495686	0.4
						2013-09-15 23:00:00	0.495442	0.4
						2013-09-16	0.49532	0.4
						2013-09-16 01:00:00	0.494955	0.4
						2013-09-16 02:00:00	0.494466	0.4
						2013-09-16 03:00:00	0.494222	0.4
						2013-09-16 04:00:00	0.493977	0.4
						2013-09-16 05:00:00	0.493732	0.4
						2013-09-16 06:00:00	0.493487	0.4
						2013-09-16 07:00:00	0.493242	0.5
						2013-09-16 08:00:00	0.492873	0.5
						2013-09-16 09:00:00	0.492627	0.4
						2013-09-16 10:00:00	0.492381	0.4
						2013-09-16 11:00:00	0.492258	0.4
						2013-09-16 12:00:00	0.492135	0.4
						2013-09-16 13:00:00	0.491888	0.4
						2013-09-16 14:00:00	0.491888	0.4
						2013-09-16 15:00:00	0.491765	0.5
						2013-09-16 16:00:00	0.491518	0.4
						2013-09-16 17:00:00	0.491394	0.4
						2013-09-16 18:00:00	0.49127	0.4
						2013-09-16 19:00:00	0.491147	0.4
						2013-09-16 20:00:00	0.490899	0.4
						2013-09-16 21:00:00	0.490651	0.5
						2013-09-16 22:00:00	0.490527	0.4
						2013-09-16 23:00:00	0.490279	0.4
						2013-09-17	0.490031	0.4
						2013-09-17 01:00:00	0.489782	0.5
						2013-09-17 02:00:00	0.489533	0.4
						2013-09-17 03:00:00	0.489284	0.4
						2013-09-17 04:00:00	0.48891	0.4
						2013-09-17 05:00:00	0.487155	0.4
						2013-09-17 06:00:00	0.485894	0.5
						2013-09-17 07:00:00	0.485261	0.4
						2013-09-17 08:00:00	0.484372	0.4
						2013-09-17 09:00:00	0.483735	0.4
						2013-09-17 10:00:00	0.483352	0.4
						2013-09-17 11:00:00	0.483096	0.4
						2013-09-17 12:00:00	0.482968	0.4
						2013-09-17 13:00:00	0.482455	0.4
						2013-09-17 14:00:00	0.482327	0.4
						2013-09-17 15:00:00	0.482069	0.5
						2013-09-17 16:00:00	0.481812	0.4
						2013-09-17 17:00:00	0.481555	0.4
						2013-09-17 18:00:00	0.481297	0.4
						2013-09-17 19:00:00	0.481038	0.5
						2013-09-17 20:00:00	0.480521	0.4
						2013-09-17 21:00:00	0.480132	0.4
						2013-09-17 22:00:00	0.479742	0.4
						2013-09-17 23:00:00	0.479482	0.5
						2013-09-18	0.479222	0.4
						2013-09-18 01:00:00	0.478831	0.4
						2013-09-18 02:00:00	0.478439	0.4
						2013-09-18 03:00:00	0.477915	0.5
						2013-09-18 04:00:00	0.477784	0.4
						2013-09-18 05:00:00	0.47857	0.4
						2013-09-18 06:00:00	0.478177	0.4
						2013-09-18 07:00:00	0.477784	0.4
						2013-09-18 08:00:00	0.477653	0.4
						2013-09-18 09:00:00	0.477521	0.4
						2013-09-18 10:00:00	0.47739	0.5
						2013-09-18 11:00:00	0.477127	0.5
						2013-09-18 12:00:00	0.476864	0.4
						2013-09-18 13:00:00	0.476468	0.4
						2013-09-18 14:00:00	0.476204	0.4
						2013-09-18 15:00:00	0.475807	0.4
						2013-09-18 16:00:00	0.475409	0.4
						2013-09-18 17:00:00	0.475011	0.5
						2013-09-18 18:00:00	0.474745	0.4
						2013-09-18 19:00:00	0.474212	0.4
						2013-09-18 20:00:00	0.473811	0.4
						2013-09-18 21:00:00	0.473543	0.4
						2013-09-18 22:00:00	0.473543	0.4
						2013-09-18 23:00:00	0.473276	0.4
						2013-09-19	0.472873	0.4
						2013-09-19 01:00:00	0.472739	0.4
						2013-09-19 02:00:00	0.472739	0.4
						2013-09-19 03:00:00	0.472604	0.4
						2013-09-19 04:00:00	0.472335	0.4
						2013-09-19 05:00:00	0.472065	0.4
						2013-09-19 06:00:00	0.471795	0.4
						2013-09-19 07:00:00	0.471254	0.4
						2013-09-19 08:00:00	0.470848	0.4
						2013-09-19 09:00:00	0.47044	0.4
						2013-09-19 10:00:00	0.470032	0.4
						2013-09-19 11:00:00	0.469486	0.4
						2013-09-19 12:00:00	0.468802	0.4
						2013-09-19 13:00:00	0.468115	0.4
						2013-09-19 14:00:00	0.467702	0.4
						2013-09-19 15:00:00	0.467426	0.4
						2013-09-19 16:00:00	0.467011	0.4
						2013-09-19 17:00:00	0.466596	0.4
						2013-09-19 18:00:00	0.46604	0.4
						2013-09-19 19:00:00	0.465622	0.4
						2013-09-19 20:00:00	0.465344	0.4
						2013-09-19 21:00:00	0.464924	0.4
						2013-09-19 22:00:00	0.464644	0.4
						2013-09-19 23:00:00	0.464364	0.4
						2013-09-20	0.464083	0.4
						2013-09-20 01:00:00	0.463239	0.4
						2013-09-20 02:00:00	0.462532	0.4
						2013-09-20 03:00:00	0.462248	0.4
						2013-09-20 04:00:00	0.461822	0.4
						2013-09-20 05:00:00	0.46111	0.4
						2013-09-20 06:00:00	0.460539	0.4
						2013-09-20 07:00:00	0.460109	0.4
						2013-09-20 08:00:00	0.459678	0.4
						2013-09-20 09:00:00	0.458958	0.4
						2013-09-20 10:00:00	0.458525	0.4
						2013-09-20 11:00:00	0.458235	0.4
						2013-09-20 12:00:00	0.457219	0.4
						2013-09-20 13:00:00	0.456343	0.4
						2013-09-20 14:00:00	0.455463	0.4
						2013-09-20 15:00:00	0.454726	0.4
						2013-09-20 16:00:00	0.453987	0.4
						2013-09-20 17:00:00	0.453245	0.4
						2013-09-20 18:00:00	0.45235	0.4
						2013-09-20 19:00:00	0.451151	0.4
						2013-09-20 20:00:00	0.450548	0.4
						2013-09-20 21:00:00	0.449943	0.4
						2013-09-20 22:00:00	0.449337	0.4
						2013-09-20 23:00:00	0.448881	0.4
						2013-09-21	0.448271	0.4
						2013-09-21 01:00:00	0.447659	0.4
						2013-09-21 02:00:00	0.447044	0.4
						2013-09-21 03:00:00	0.446428	0.4
						2013-09-21 04:00:00	0.445501	0.4
						2013-09-21 05:00:00	0.444412	0.4
						2013-09-21 06:00:00	0.443317	0.4
						2013-09-21 07:00:00	0.4419	0.4
						2013-09-21 08:00:00	0.440472	0.4
						2013-09-21 09:00:00	0.438391	0.4
						2013-09-21 10:00:00	0.436448	0.4
						2013-09-21 11:00:00	0.434157	0.4
						2013-09-21 12:00:00	0.431503	0.4
						2013-09-21 13:00:00	0.429489	0.4
						2013-09-21 14:00:00	0.427794	0.4
						2013-09-21 15:00:00	0.426255	0.4
						2013-09-21 16:00:00	0.424877	0.4
						2013-09-21 17:00:00	0.423663	0.4
						2013-09-21 18:00:00	0.422617	0.4
						2013-09-21 19:00:00	0.421564	0.4
						2013-09-21 20:00:00	0.420683	0.4
						2013-09-21 21:00:00	0.419975	0.4
						2013-09-21 22:00:00	0.419087	0.4
						2013-09-21 23:00:00	0.418016	0.4
						2013-09-22	0.416758	0.4
						2013-09-22 01:00:00	0.41513	0.4
						2013-09-22 02:00:00	0.413488	0.4
						2013-09-22 03:00:00	0.411832	0.4
						2013-09-22 04:00:00	0.409417	0.4
						2013-09-22 05:00:00	0.406783	0.4
						2013-09-22 06:00:00	0.404115	0.4
						2013-09-22 07:00:00	0.401022	0.4
						2013-09-22 08:00:00	0.397686	0.4
						2013-09-22 09:00:00	0.394095	0.4
						2013-09-22 10:00:00	0.390443	0.4
						2013-09-22 11:00:00	0.387145	0.4
						2013-09-22 12:00:00	0.384218	0.4
						2013-09-22 13:00:00	0.381677	0.4
						2013-09-22 14:00:00	0.379324	0.4
						2013-09-22 15:00:00	0.37738	0.4
						2013-09-22 16:00:00	0.375419	0.4
						2013-09-22 17:00:00	0.373882	0.4
						2013-09-22 18:00:00	0.372336	0.4
						2013-09-22 19:00:00	0.370779	0.4
						2013-09-22 20:00:00	0.369436	0.4
						2013-09-22 21:00:00	0.368085	0.4
						2013-09-22 22:00:00	0.366727	0.4
						2013-09-22 23:00:00	0.365589	0.4
						2013-09-23	0.364217	0.4
						2013-09-23 01:00:00	0.362375	0.4
						2013-09-23 02:00:00	0.360751	0.4
						2013-09-23 03:00:00	0.358883	0.4
						2013-09-23 04:00:00	0.357236	0.4
						2013-09-23 05:00:00	0.355579	0.4
						2013-09-23 06:00:00	0.353432	0.4
						2013-09-23 07:00:00	0.351024	0.4
						2013-09-23 08:00:00	0.348594	0.4
						2013-09-23 09:00:00	0.345647	0.4
						2013-09-23 10:00:00	0.342667	0.4
						2013-09-23 11:00:00	0.339652	0.4
						2013-09-23 12:00:00	0.336348	0.4
						2013-09-23 13:00:00	0.333003	0.4
						2013-09-23 14:00:00	0.329878	0.4
						2013-09-23 15:00:00	0.326983	0.4
						2013-09-23 16:00:00	0.324325	0.4
						2013-09-23 17:00:00	0.322181	0.4
						2013-09-23 18:00:00	0.32002	0.4
						2013-09-23 19:00:00	0.318116	0.4
						2013-09-23 20:00:00	0.316475	0.4
						2013-09-23 21:00:00	0.314824	0.4
						2013-09-23 22:00:00	0.313163	0.4
						2013-09-23 23:00:00	0.311215	0.4
						2013-09-24	0.308972	0.4
						2013-09-24 01:00:00	0.306428	0.4
						2013-09-24 02:00:00	0.303291	0.4
						2013-09-24 03:00:00	0.300121	0.4
						2013-09-24 04:00:00	0.296333	0.4
						2013-09-24 05:00:00	0.291906	0.4
						2013-09-24 06:00:00	0.286813	0.4
						2013-09-24 07:00:00	0.281947	0.3
						2013-09-24 08:00:00	0.276697	0.3
						2013-09-24 09:00:00	0.271682	0.3
						2013-09-24 10:00:00	0.266592	0.3
						2013-09-24 11:00:00	0.262402	0.3
						2013-09-24 12:00:00	0.258818	0.3
						2013-09-24 13:00:00	0.255198	0.4
						2013-09-24 14:00:00	0.25221	0.4
						2013-09-24 15:00:00	0.249533	0.4
						2013-09-24 16:00:00	0.246836	0.4
						2013-09-24 17:00:00	0.245141	0.4
						2013-09-24 18:00:00	0.243097	0.4
						2013-09-24 19:00:00	0.241385	0.4
						2013-09-24 20:00:00	0.24001	0.4
						2013-09-24 21:00:00	0.238285	0.4
						2013-09-24 22:00:00	0.236551	0.4
						2013-09-24 23:00:00	0.234461	0.4
						2013-09-25	0.232359	0.3
						2013-09-25 01:00:00	0.22954	0.3
						2013-09-25 02:00:00	0.227056	0.3
						2013-09-25 03:00:00	0.224558	0.3
						2013-09-25 04:00:00	0.222403	0.3
						2013-09-25 05:00:00	0.219875	0.3
						2013-09-25 06:00:00	0.217696	0.3
						2013-09-25 07:00:00	0.215505	0.3
						2013-09-25 08:00:00	0.213303	0.3
						2013-09-25 09:00:00	0.211459	0.3
						2013-09-25 10:00:00	0.209607	0.3
						2013-09-25 11:00:00	0.207746	0.3
						2013-09-25 12:00:00	0.206252	0.3
						2013-09-25 13:00:00	0.204753	0.3
						2013-09-25 14:00:00	0.204001	0.4
						2013-09-25 15:00:00	0.203248	0.4
						2013-09-25 16:00:00	0.202116	0.4
						2013-09-25 17:00:00	0.20136	0.4
						2013-09-25 18:00:00	0.200981	0.4
						2013-09-25 19:00:00	0.200602	0.4
						2013-09-25 20:00:00	0.200223	0.4
						2013-09-25 21:00:00	0.199843	0.4
						2013-09-25 22:00:00	0.199463	0.4
						2013-09-25 23:00:00	0.199463	0.4
						2013-09-26	0.199083	0.4
						2013-09-26 01:00:00	0.198703	0.4
						2013-09-26 02:00:00	0.198322	0.4
						2013-09-26 03:00:00	0.19794	0.4
						2013-09-26 04:00:00	0.19794	0.4
						2013-09-26 05:00:00	0.197559	0.4
						2013-09-26 06:00:00	0.197177	0.4
						2013-09-26 07:00:00	0.196794	0.4
						2013-09-26 08:00:00	0.196794	0.4
						2013-09-26 09:00:00	0.196412	0.4
						2013-09-26 10:00:00	0.196029	0.4
						2013-09-26 11:00:00	0.195646	0.4
						2013-09-26 12:00:00	0.195262	0.4
						2013-09-26 13:00:00	0.195262	0.4
						2013-09-26 14:00:00	0.194878	0.4
						2013-09-26 15:00:00	0.194494	0.4
						2013-09-26 16:00:00	0.194494	0.4
						2013-09-26 17:00:00	0.194109	0.4
						2013-09-26 18:00:00	0.194109	0.4
						2013-09-26 19:00:00	0.194109	0.4
						2013-09-26 20:00:00	0.193724	0.4
						2013-09-26 21:00:00	0.194109	0.4
						2013-09-26 22:00:00	0.193724	0.4
						2013-09-26 23:00:00	0.193724	0.4
						2013-09-27	0.193724	0.4
						2013-09-27 01:00:00	0.193724	0.4
						2013-09-27 02:00:00	0.193724	0.4
						2013-09-27 03:00:00	0.193339	0.4
						2013-09-27 04:00:00	0.193339	0.4
						2013-09-27 05:00:00	0.192953	0.4
						2013-09-27 06:00:00	0.192567	0.4
						2013-09-27 07:00:00	0.191795	0.4
						2013-09-27 08:00:00	0.19102	0.4
						2013-09-27 09:00:00	0.189857	0.4
						2013-09-27 10:00:00	0.18869	0.3
						2013-09-27 11:00:00	0.187129	0.3
						2013-09-27 12:00:00	0.185563	0.3
						2013-09-27 13:00:00	0.183992	0.3
						2013-09-27 14:00:00	0.182415	0.3
						2013-09-27 15:00:00	0.181229	0.3
						2013-09-27 16:00:00	0.18004	0.3
						2013-09-27 17:00:00	0.178847	0.3
						2013-09-27 18:00:00	0.178449	0.3
						2013-09-27 19:00:00	0.177652	0.3
						2013-09-27 20:00:00	0.176853	0.3
						2013-09-27 21:00:00	0.176454	0.3
						2013-09-27 22:00:00	0.175653	0.3
						2013-09-27 23:00:00	0.174851	0.3
						2013-09-28	0.173645	0.3
						2013-09-28 01:00:00	0.172436	0.3
						2013-09-28 02:00:00	0.171224	0.3
						2013-09-28 03:00:00	0.17001	0.3
						2013-09-28 04:00:00	0.168791	0.3
						2013-09-28 05:00:00	0.16757	0.3
						2013-09-28 06:00:00	0.165937	0.3
						2013-09-28 07:00:00	0.164709	0.3
						2013-09-28 08:00:00	0.163477	0.3
						2013-09-28 09:00:00	0.162242	0.3
						2013-09-28 10:00:00	0.161417	0.3
						2013-09-28 11:00:00	0.160591	0.3
						2013-09-28 12:00:00	0.160177	0.3
						2013-09-28 13:00:00	0.159763	0.3
						2013-09-28 14:00:00	0.159763	0.3
						2013-09-28 15:00:00	0.159349	0.3
						2013-09-28 16:00:00	0.159349	0.3
						2013-09-28 17:00:00	0.159349	0.3
						2013-09-28 18:00:00	0.159349	0.3
						2013-09-28 19:00:00	0.159349	0.3
						2013-09-28 20:00:00	0.159349	0.3
						2013-09-28 21:00:00	0.159349	0.3
						2013-09-28 22:00:00	0.159349	0.3
						2013-09-28 23:00:00	0.159349	0.3
						2013-09-29	0.159349	0.3
						2013-09-29 01:00:00	0.158934	0.3
						2013-09-29 02:00:00	0.158934	0.3
						2013-09-29 03:00:00	0.158934	0.3
						2013-09-29 04:00:00	0.158519	0.3
						2013-09-29 05:00:00	0.158103	0.3
						2013-09-29 06:00:00	0.157687	0.3
						2013-09-29 07:00:00	0.157271	0.3
						2013-09-29 08:00:00	0.156855	0.3
						2013-09-29 09:00:00	0.156438	0.3
						2013-09-29 10:00:00	0.156021	0.3
						2013-09-29 11:00:00	0.155603	0.3
						2013-09-29 12:00:00	0.155185	0.3
						2013-09-29 13:00:00	0.154767	0.3
						2013-09-29 14:00:00	0.154767	0.3
						2013-09-29 15:00:00	0.154348	0.3
						2013-09-29 16:00:00	0.154348	0.3
						2013-09-29 17:00:00	0.154348	0.3
						2013-09-29 18:00:00	0.154348	0.3
						2013-09-29 19:00:00	0.153929	0.3
						2013-09-29 20:00:00	0.15351	0.3
						2013-09-29 21:00:00	0.15309	0.3
						2013-09-29 22:00:00	0.15225	0.3
						2013-09-29 23:00:00	0.151408	0.3
						2013-09-30	0.150564	0.3
						2013-09-30 01:00:00	0.149297	0.3
						2013-09-30 02:00:00	0.14845	0.2
						2013-09-30 03:00:00	0.147177	0.2
						2013-09-30 04:00:00	0.145901	0.2
						2013-09-30 05:00:00	0.144621	0.2
						2013-09-30 06:00:00	0.143766	0.2
						2013-09-30 07:00:00	0.14291	0.2
						2013-09-30 08:00:00	0.142053	0.2
						2013-09-30 09:00:00	0.141194	0.2
						2013-09-30 10:00:00	0.139902	0.2
						2013-09-30 11:00:00	0.139471	0.2
						2013-09-30 12:00:00	0.138608	0.2
						2013-09-30 13:00:00	0.138175	0.2
						2013-09-30 14:00:00	0.138175	0.2
						2013-09-30 15:00:00	0.137743	0.2
						2013-09-30 16:00:00	0.137743	0.2
						2013-09-30 17:00:00	0.137743	0.2
						2013-09-30 18:00:00	0.137743	0.2
						2013-09-30 19:00:00	0.137743	0.2
						2013-09-30 20:00:00	0.13731	0.2
						2013-09-30 21:00:00	0.136877	0.2
						2013-09-30 22:00:00	0.136009	0.2
						2013-09-30 23:00:00	0.13514	0.1
						2013-10-01	0.134269	0.1
						2013-10-01 01:00:00	0.133397	0.1
						2013-10-01 02:00:00	0.13296	0.1
						2013-10-01 03:00:00	0.132086	0.1
						2013-10-01 04:00:00	0.131648	0.1
						2013-10-01 05:00:00	0.13121	0.1
						2013-10-01 06:00:00	0.130772	0.1
						2013-10-01 07:00:00	0.130333	0.1
						2013-10-01 08:00:00	0.130333	0.1
						2013-10-01 09:00:00	0.129894	0.1
						2013-10-01 10:00:00	0.129454	0.1
						2013-10-01 11:00:00	0.129014	0.1
						2013-10-01 12:00:00	0.129014	0.1
						2013-10-01 13:00:00	0.128574	0.1
						2013-10-01 14:00:00	0.128574	0.1
						2013-10-01 15:00:00	0.128574	0.1
						2013-10-01 16:00:00	0.128574	0.1
						2013-10-01 17:00:00	0.128574	0.1
						2013-10-01 18:00:00	0.128574	0.1
[truncated: 8,021 more rows]

## Sheet: Atmospheric2013-2014
	2013-2014 season			2013-2014 season
date	Air temp. (°C)	Wind speed (m/s)		date	Snow depth, m
2013-07-11 09:00:00	1.52976	3.53365		2013-07-11 12:00:00	-0.023
2013-07-11 10:00:00	1.40521	4.08911		2013-07-12 12:00:00	-0.023
2013-07-11 11:00:00	2.02083	4.46825		2013-07-13 12:00:00	-0.023
2013-07-11 12:00:00	2.55868	5.09586		2013-07-14 12:00:00	-0.023
2013-07-11 13:00:00	2.74896	4.91897		2013-07-15 12:00:00	-0.023
2013-07-11 14:00:00	2.54861	4.43965		2013-07-16 12:00:00	-0.022
2013-07-11 15:00:00	2.59201	5.23189		2013-07-17 12:00:00	-0.023
2013-07-11 16:00:00	2.01528	5.58754		2013-07-18 12:00:00	-0.023
2013-07-11 17:00:00	2.13924	6.62718		2013-07-19 12:00:00	-0.021
2013-07-11 18:00:00	2.33299	6.93072		2013-07-20 12:00:00	-0.022
2013-07-11 19:00:00	1.96076	6.14095		2013-07-21 12:00:00	-0.023
2013-07-11 20:00:00	3.90313	6.0366		2013-07-22 12:00:00	-0.023
2013-07-11 21:00:00	4.61007	5.84916		2013-07-23 12:00:00	-0.021
2013-07-11 22:00:00	4.79236	5.93657		2013-07-24 12:00:00	-0.023
2013-07-11 23:00:00	3.77917	5.82836		2013-07-25 12:00:00	-0.017
2013-07-12	2.59132	5.46742		2013-07-26 12:00:00	-0.022
2013-07-12 01:00:00	2.81319	5.12058		2013-07-27 12:00:00	-0.019
2013-07-12 02:00:00	2.63785	4.6073		2013-07-28 12:00:00	-0.014
2013-07-12 03:00:00	3.12257	4.30497		2013-07-29 12:00:00	-0.021
2013-07-12 04:00:00	3.27222	3.93469		2013-07-30 12:00:00	-0.008
2013-07-12 05:00:00	1.7125	3.9753		2013-07-31 12:00:00	-0.003
2013-07-12 06:00:00	3.14479	4.54592		2013-08-01 12:00:00	-0.018
2013-07-12 07:00:00	2.61424	4.59502		2013-08-02 12:00:00	-0.019
2013-07-12 08:00:00	2.10972	4.94363		2013-08-03 12:00:00	-0.014
2013-07-12 09:00:00	1.99583	4.96008		2013-08-04 12:00:00	-0.016
2013-07-12 10:00:00	3.16458	4.86557		2013-08-05 12:00:00	-0.015
2013-07-12 11:00:00	2.71597	4.67281		2013-08-06 12:00:00	-0.02
2013-07-12 12:00:00	1.48611	5.90326		2013-08-07 12:00:00	-0.017
2013-07-12 13:00:00	3.15243	4.3376		2013-08-08 12:00:00	-0.014
2013-07-12 14:00:00	3.94062	3.13841		2013-08-09 12:00:00	-0.015
2013-07-12 15:00:00	2.19583	2.51263		2013-08-10 12:00:00	-0.013
2013-07-12 16:00:00	1.80278	2.57263		2013-08-11 12:00:00	-0.008
2013-07-12 17:00:00	2.03854	2.10159		2013-08-12 12:00:00	-0.022
2013-07-12 18:00:00	2.33194	2.80496		2013-08-13 12:00:00	0.001
2013-07-12 19:00:00	1.30729	2.56463		2013-08-14 12:00:00	-0.002
2013-07-12 20:00:00	2.09687	2.40472		2013-08-15 12:00:00	0.015
2013-07-12 21:00:00	2.35208	2.14939		2013-08-16 12:00:00	-0.002
2013-07-12 22:00:00	2.68993	2.02992		2013-08-17 12:00:00	0.006
2013-07-12 23:00:00	2.33055	1.68815		2013-08-18 12:00:00	0.007
2013-07-13	1.63715	2.10557		2013-08-19 12:00:00	0.007
2013-07-13 01:00:00	2.37222	2.20918		2013-08-20 12:00:00	0.01
2013-07-13 02:00:00	1.68958	2.0976		2013-08-21 12:00:00	0.004
2013-07-13 03:00:00	0.292361	2.33684		2013-08-22 12:00:00	-0.002
2013-07-13 04:00:00	0.863889	2.2331		2013-08-23 12:00:00	0.002
2013-07-13 05:00:00	0.783681	2.18526		2013-08-24 12:00:00	0.015
2013-07-13 06:00:00	1.72882	2.43269		2013-08-25 12:00:00	-0.004
2013-07-13 07:00:00	1.94757	2.74482		2013-08-26 12:00:00	-0.007
2013-07-13 08:00:00	1.45625	3.06198		2013-08-27 12:00:00	0.008
2013-07-13 09:00:00	1.57674	3.27937		2013-08-28 12:00:00	0.002
2013-07-13 10:00:00	0.707639	3.93063		2013-08-29 12:00:00	-0.005
2013-07-13 11:00:00	1.65799	4.21123		2013-08-30 12:00:00	0.021
2013-07-13 12:00:00	1.07639	3.72786		2013-08-31 12:00:00	0.003
2013-07-13 13:00:00	1.18021	5.05881		2013-09-01 12:00:00	0.002
2013-07-13 14:00:00	1.82187	5.22777		2013-09-02 12:00:00	0.008
2013-07-13 15:00:00	2.56007	4.93952		2013-09-03 12:00:00	0.002
2013-07-13 16:00:00	4.44965	8.06879		2013-09-04 12:00:00	-0.002
2013-07-13 17:00:00	5.65174	8.06019		2013-09-05 12:00:00	-0.018
2013-07-13 18:00:00	5.51215	9.43035		2013-09-06 12:00:00	0.007
2013-07-13 19:00:00	5.17778	9.62875		2013-09-07 12:00:00	-0.003
2013-07-13 20:00:00	4.17153	9.56254		2013-09-08 12:00:00	-0.019
2013-07-13 21:00:00	3.50451	9.16688		2013-09-09 12:00:00	0.002
2013-07-13 22:00:00	3.35382	8.49175		2013-09-10 12:00:00	0.001
2013-07-13 23:00:00	1.17951	7.19745		2013-09-11 12:00:00	0.006
2013-07-14	0.654861	6.96876		2013-09-12 12:00:00	0.01
2013-07-14 01:00:00	0.897569	7.04913		2013-09-13 12:00:00	0.009
2013-07-14 02:00:00	1.25556	6.5347		2013-09-14 12:00:00	0.003
2013-07-14 03:00:00	0.997569	5.60827		2013-09-15 12:00:00	0
2013-07-14 04:00:00	0.673264	5.3971		2013-09-16 12:00:00	0.002
2013-07-14 05:00:00	0.881944	5.93657		2013-09-17 12:00:00	0.003
2013-07-14 06:00:00	0.637847	6.63139		2013-09-18 12:00:00	0
2013-07-14 07:00:00	1.00868	5.29793		2013-09-19 12:00:00	0.003
2013-07-14 08:00:00	0.818056	6.14095		2013-09-20 12:00:00	0.004
2013-07-14 09:00:00	1.37222	5.90742		2013-09-21 12:00:00	-0.003
2013-07-14 10:00:00	1.22083	7.15504		2013-09-22 12:00:00	0.013
2013-07-14 11:00:00	2.70174	5.39297		2013-09-23 12:00:00	0.015
2013-07-14 12:00:00	3.16007	5.10822		2013-09-24 12:00:00	0.016
2013-07-14 13:00:00	2.13264	6.16184		2013-09-25 12:00:00	0.01
2013-07-14 14:00:00	2.45	6.9899		2013-09-26 12:00:00	0.007
2013-07-14 15:00:00	1.99896	6.88848		2013-09-27 12:00:00	-0.002
2013-07-14 16:00:00	2.23299	6.08667		2013-09-28 12:00:00	0.013
2013-07-14 17:00:00	2.15417	5.32684		2013-09-29 12:00:00	0.007
2013-07-14 18:00:00	1.93785	5.5171		2013-09-30 12:00:00	0.015
2013-07-14 19:00:00	3.6743	6.04912		2013-10-01 12:00:00	0.012
2013-07-14 20:00:00	2.29062	5.73692		2013-10-02 12:00:00	0.009
2013-07-14 21:00:00	1.775	6.25383		2013-10-03 12:00:00	-0.002
2013-07-14 22:00:00	2.25139	6.15766		2013-10-04 12:00:00	0.015
2013-07-14 23:00:00	2.35972	5.45087		2013-10-05 12:00:00	0.016
2013-07-15	2.28819	4.66052		2013-10-06 12:00:00	0.011
2013-07-15 01:00:00	1.92986	4.55819		2013-10-07 12:00:00	0.016
2013-07-15 02:00:00	1.49896	4.72198		2013-10-08 12:00:00	0.01
2013-07-15 03:00:00	2.33924	4.86557		2013-10-09 12:00:00	0.006
2013-07-15 04:00:00	2.38403	4.38657		2013-10-10 12:00:00	0.006
2013-07-15 05:00:00	1.6	4.98886		2013-10-11 12:00:00	0.016
2013-07-15 06:00:00	1.95243	5.36403		2013-10-12 12:00:00	0.025
2013-07-15 07:00:00	3.50625	4.46825		2013-10-13 12:00:00	0.032
2013-07-15 08:00:00	3.63958	4.58683		2013-10-14 12:00:00	0.027
2013-07-15 09:00:00	3.21354	4.75478		2013-10-15 12:00:00	0.066
2013-07-15 10:00:00	2.98576	4.64005		2013-10-16 12:00:00	0.066
2013-07-15 11:00:00	2.76597	4.43148		2013-10-17 12:00:00	0.057
2013-07-15 12:00:00	1.59792	4.63595		2013-10-18 12:00:00	0.066
2013-07-15 13:00:00	1.68333	4.42332		2013-10-19 12:00:00	0.068
2013-07-15 14:00:00	1.96875	3.97124		2013-10-20 12:00:00	0.066
2013-07-15 15:00:00	1.60139	4.14201		2013-10-21 12:00:00	0.069
2013-07-15 16:00:00	0.859375	3.96311		2013-10-22 12:00:00	0.072
2013-07-15 17:00:00	2.42153	4.55001		2013-10-23 12:00:00	0.067
2013-07-15 18:00:00	2.76736	5.19477		2013-10-24 12:00:00	0.078
2013-07-15 19:00:00	2.8	5.54196		2013-10-25 12:00:00	0.063
2013-07-15 20:00:00	2.58889	4.86147		2013-10-26 12:00:00	0.078
2013-07-15 21:00:00	1.6743	4.39473		2013-10-27 12:00:00	0.082
2013-07-15 22:00:00	0.589931	3.85352		2013-10-28 12:00:00	0.089
2013-07-15 23:00:00	0.712153	4.30497		2013-10-29 12:00:00	0.095
2013-07-16	1.2441	3.82513		2013-10-30 12:00:00	0.097
2013-07-16 01:00:00	0.930555	2.87317		2013-10-31 12:00:00	0.092
2013-07-16 02:00:00	0.948611	3.57003		2013-11-01 12:00:00	0.079
2013-07-16 03:00:00	0.653472	3.65498		2013-11-02 12:00:00	0.089
2013-07-16 04:00:00	0.467014	3.99155		2013-11-03 12:00:00	0.08
2013-07-16 05:00:00	0.471875	4.82863		2013-11-04 12:00:00	0.092
2013-07-16 06:00:00	1.21181	5.52953		2013-11-05 12:00:00	0.098
2013-07-16 07:00:00	1.50799	5.24427		2013-11-06 12:00:00	0.097
2013-07-16 08:00:00	1.01736	5.6456		2013-11-07 12:00:00	0.089
2013-07-16 09:00:00	1.34236	8.26264		2013-11-08 12:00:00	0.075
2013-07-16 10:00:00	2.26042	8.00001		2013-11-09 12:00:00	0.078
2013-07-16 11:00:00	1.72465	8.50041		2013-11-10 12:00:00	0.084
2013-07-16 12:00:00	1.88924	8.54808		2013-11-11 12:00:00	0.082
2013-07-16 13:00:00	1.17743	9.95654		2013-11-12 12:00:00	0.091
2013-07-16 14:00:00	1.41285	10.5956		2013-11-13 12:00:00	0.081
2013-07-16 15:00:00	2.36736	10.7983		2013-11-14 12:00:00	0.096
2013-07-16 16:00:00	2.14201	11.0561		2013-11-15 12:00:00	0.086
2013-07-16 17:00:00	2.075	12.3932		2013-11-16 12:00:00	0.107
2013-07-16 18:00:00	3.69653	13.3859		2013-11-17 12:00:00	0.103
2013-07-16 19:00:00	3.5309	13.4859		2013-11-18 12:00:00	0.074
2013-07-16 20:00:00	2.74444	11.0335		2013-11-19 12:00:00	0.081
2013-07-16 21:00:00	1.40556	8.59578		2013-11-20 12:00:00	0.093
2013-07-16 22:00:00	1.04722	7.53347		2013-11-21 12:00:00	0.064
2013-07-16 23:00:00	2.28889	7.31209		2013-11-22 12:00:00	0.051
2013-07-17	1.80243	6.89692		2013-11-23 12:00:00	0.064
2013-07-17 01:00:00	0.486111	6.44654		2013-11-24 12:00:00	0.047
2013-07-17 02:00:00	0.497917	6.56832		2013-11-25 12:00:00	0.082
2013-07-17 03:00:00	0.450347	6.23709		2013-11-26 12:00:00	0.07
2013-07-17 04:00:00	0.318055	6.5389		2013-11-27 12:00:00	0.074
2013-07-17 05:00:00	0.66875	6.41718		2013-11-28 12:00:00	0.059
2013-07-17 06:00:00	0.607292	5.05881		2013-11-29 12:00:00	0.078
2013-07-17 07:00:00	1.64167	4.65643		2013-11-30 12:00:00	0.056
2013-07-17 08:00:00	1.71806	4.2153		2013-12-01 12:00:00	0.067
2013-07-17 09:00:00	2.14653	4.47642		2013-12-02 12:00:00	0.069
2013-07-17 10:00:00	1.57812	6.32499		2013-12-03 12:00:00	0.058
2013-07-17 11:00:00	2.37535	7.61454		2013-12-04 12:00:00	0.059
2013-07-17 12:00:00	2.92674	6.73663		2013-12-05 12:00:00	0.057
2013-07-17 13:00:00	2.90069	8.13765		2013-12-06 12:00:00	0.059
2013-07-17 14:00:00	3.39028	8.27127		2013-12-07 12:00:00	0.06
2013-07-17 15:00:00	1.5375	8.24107		2013-12-08 12:00:00	0.075
2013-07-17 16:00:00	1.99097	6.74085		2013-12-09 12:00:00	0.07
2013-07-17 17:00:00	2.7625	7.2866		2013-12-10 12:00:00	0.051
2013-07-17 18:00:00	3.15382	8.00001		2013-12-11 12:00:00	0.055
2013-07-17 19:00:00	3.23646	6.6903		2013-12-12 12:00:00	0.069
2013-07-17 20:00:00	3	6.18274		2013-12-13 12:00:00	0.086
2013-07-17 21:00:00	2.92465	5.8658		2013-12-14 12:00:00	0.068
2013-07-17 22:00:00	3.21389	5.46329		2013-12-15 12:00:00	0.067
2013-07-17 23:00:00	2.80451	5.00531		2013-12-16 12:00:00	0.072
2013-07-18	2.20868	6.01158		2013-12-17 12:00:00	0.069
2013-07-18 01:00:00	1.86111	5.83668		2013-12-18 12:00:00	0.068
2013-07-18 02:00:00	2.39132	5.67464		2013-12-19 12:00:00	0.07
2013-07-18 03:00:00	2.80174	4.80811		2013-12-20 12:00:00	0.076
2013-07-18 04:00:00	1.36424	5.3971		2013-12-21 12:00:00	0.054
2013-07-18 05:00:00	2.90972	4.64005		2013-12-22 12:00:00	0.042
2013-07-18 06:00:00	2.34618	4.57865		2013-12-23 12:00:00	0.052
2013-07-18 07:00:00	2.50521	4.32944		2013-12-24 12:00:00	0.067
2013-07-18 08:00:00	2.12986	5.48398		2013-12-25 12:00:00	0.059
2013-07-18 09:00:00	1.85799	6.14513		2013-12-26 12:00:00	0.049
2013-07-18 10:00:00	2.05486	7.35461		2013-12-27 12:00:00	0.071
2013-07-18 11:00:00	2.24063	8.39222		2013-12-28 12:00:00	0.079
2013-07-18 12:00:00	4.00417	8.24107		2013-12-29 12:00:00	0.087
2013-07-18 13:00:00	3.67257	9.10121		2013-12-30 12:00:00	0.071
2013-07-18 14:00:00	3.29479	8.80004		2013-12-31 12:00:00	0.077
2013-07-18 15:00:00	4.44132	7.93131		2014-01-01 12:00:00	0.056
2013-07-18 16:00:00	4.8184	7.47805		2014-01-02 12:00:00	0.066
2013-07-18 17:00:00	5.37569	7.81555		2014-01-03 12:00:00	0.071
2013-07-18 18:00:00	3.15764	8.58711		2014-01-04 12:00:00	0.082
2013-07-18 19:00:00	2.11979	7.84983		2014-01-05 12:00:00	0.062
2013-07-18 20:00:00	1.5934	7.76845		2014-01-06 12:00:00	0.04
2013-07-18 21:00:00	1.90556	7.67008		2014-01-07 12:00:00	0.087
2013-07-18 22:00:00	2.27639	7.58466		2014-01-08 12:00:00	0.076
2013-07-18 23:00:00	3.08333	6.24546		2014-01-09 12:00:00	0.083
2013-07-19	3.75382	5.3599		2014-01-10 12:00:00	0.066
2013-07-19 01:00:00	3.22396	4.59093		2014-01-11 12:00:00	0.073
2013-07-19 02:00:00	1.68646	5.83668		2014-01-12 12:00:00	0.059
2013-07-19 03:00:00	2.02743	6.84626		2014-01-13 12:00:00	0.051
2013-07-19 04:00:00	1.6566	7.02374		2014-01-14 12:00:00	0.062
2013-07-19 05:00:00	1.83819	6.84204		2014-01-15 12:00:00	0.065
2013-07-19 06:00:00	1.7625	7.27386		2014-01-16 12:00:00	0.095
2013-07-19 07:00:00	2.81528	6.99836		2014-01-17 12:00:00	0.093
2013-07-19 08:00:00	5.07014	6.59354		2014-01-18 12:00:00	0.088
2013-07-19 09:00:00	5.45208	7.13384		2014-01-19 12:00:00	0.091
2013-07-19 10:00:00	6.01007	8.3706		2014-01-20 12:00:00	0.089
2013-07-19 11:00:00	5.86771	7.21442		2014-01-21 12:00:00	0.09
2013-07-19 12:00:00	6.25451	7.18472		2014-01-22 12:00:00	0.091
2013-07-19 13:00:00	5.59618	8.14195		2014-01-23 12:00:00	0.105
2013-07-19 14:00:00	5.2684	7.542		2014-01-24 12:00:00	0.095
2013-07-19 15:00:00	4.69479	7.13384		2014-01-25 12:00:00	0.082
2013-07-19 16:00:00	3.85278	7.09995		2014-01-26 12:00:00	0.087
2013-07-19 17:00:00	5.47361	7.49936		2014-01-27 12:00:00	0.098
2013-07-19 18:00:00	5.33646	6.83361		2014-01-28 12:00:00	0.095
2013-07-19 19:00:00	1.51701	5.72031		2014-01-29 12:00:00	0.121
2013-07-19 20:00:00	3.67014	6.45913		2014-01-30 12:00:00	0.099
2013-07-19 21:00:00	4.5	7.40566		2014-01-31 12:00:00	0.098
2013-07-19 22:00:00	3.87743	6.46333		2014-02-01 12:00:00	0.106
2013-07-19 23:00:00	4.47431	4.94774		2014-02-02 12:00:00	0.112
2013-07-20	3.23264	3.94281		2014-02-03 12:00:00	0.093
2013-07-20 01:00:00	2.63056	3.70761		2014-02-04 12:00:00	0.088
2013-07-20 02:00:00	2.76875	3.60643		2014-02-05 12:00:00	0.074
2013-07-20 03:00:00	2.59965	3.54577		2014-02-06 12:00:00	0.092
2013-07-20 04:00:00	2.44687	3.45689		2014-02-07 12:00:00	0.056
2013-07-20 05:00:00	2.04132	4.73018		2014-02-08 12:00:00	0.083
2013-07-20 06:00:00	1.75729	5.4426		2014-02-09 12:00:00	0.089
2013-07-20 07:00:00	2.4934	4.98475		2014-02-10 12:00:00	0.089
2013-07-20 08:00:00	2.08021	6.37526		2014-02-11 12:00:00	0.092
2013-07-20 09:00:00	2.55938	6.06581		2014-02-12 12:00:00	0.093
2013-07-20 10:00:00	3.48333	5.58754		2014-02-13 12:00:00	0.095
2013-07-20 11:00:00	3.83785	5.65804		2014-02-14 12:00:00	0.098
2013-07-20 12:00:00	3.47222	6.14095		2014-02-15 12:00:00	0.108
2013-07-20 13:00:00	2.86944	7.01951		2014-02-16 12:00:00	0.106
2013-07-20 14:00:00	3.72986	7.57613		2014-02-17 12:00:00	0.103
2013-07-20 15:00:00	3.17222	8.31876		2014-02-18 12:00:00	0.089
2013-07-20 16:00:00	3.12465	8.3274		2014-02-19 12:00:00	0.106
2013-07-20 17:00:00	2.53333	8.95698		2014-02-20 12:00:00	0.101
2013-07-20 18:00:00	2.49271	8.31444		2014-02-21 12:00:00	0.11
2013-07-20 19:00:00	2.81701	7.59747		2014-02-22 12:00:00	0.099
2013-07-20 20:00:00	2.13611	7.02797		2014-02-23 12:00:00	0.125
2013-07-20 21:00:00	1.57986	6.48851		2014-02-24 12:00:00	0.107
2013-07-20 22:00:00	1.85868	5.9574		2014-02-25 12:00:00	0.123
2013-07-20 23:00:00	1.28958	5.37643		2014-02-26 12:00:00	0.106
2013-07-21	1.23924	4.4274		2014-02-27 12:00:00	0.106
2013-07-21 01:00:00	1.76285	2.95748		2014-02-28 12:00:00	0.12
2013-07-21 02:00:00	0.891319	2.94142		2014-03-01 12:00:00	0.093
2013-07-21 03:00:00	0.483333	3.25922		2014-03-02 12:00:00	0.09
2013-07-21 04:00:00	0.663889	4.61958		2014-03-03 12:00:00	0.114
2013-07-21 05:00:00	2.67639	3.96311		2014-03-04 12:00:00	0.121
2013-07-21 06:00:00	2.53715	4.57865		2014-03-05 12:00:00	0.126
2013-07-21 07:00:00	1.61285	5.89493		2014-03-06 12:00:00	0.108
2013-07-21 08:00:00	2.34236	4.98886		2014-03-07 12:00:00	0.061
2013-07-21 09:00:00	2.73333	5.00531		2014-03-08 12:00:00	0.061
2013-07-21 10:00:00	2.06667	5.30619		2014-03-09 12:00:00	0.064
2013-07-21 11:00:00	2.86597	5.50054		2014-03-10 12:00:00	0.061
2013-07-21 12:00:00	2.87986	6.00741		2014-03-11 12:00:00	0.062
2013-07-21 13:00:00	2.91632	6.31661		2014-03-12 12:00:00	0.07
2013-07-21 14:00:00	3.06528	6.34593		2014-03-13 12:00:00	0.058
2013-07-21 15:00:00	2.4125	6.55571		2014-03-14 12:00:00	0.066
2013-07-21 16:00:00	2.3816	6.40041		2014-03-15 12:00:00	0.067
2013-07-21 17:00:00	2.55938	6.35012		2014-03-16 12:00:00	0.073
2013-07-21 18:00:00	2.51667	5.98657		2014-03-17 12:00:00	0.058
2013-07-21 19:00:00	2.23333	5.74938		2014-03-18 12:00:00	0.057
2013-07-21 20:00:00	1.57569	5.86996		2014-03-19 12:00:00	0.053
2013-07-21 21:00:00	1.32917	5.70785		2014-03-20 12:00:00	0.069
2013-07-21 22:00:00	2.20833	4.92719		2014-03-21 12:00:00	0.063
2013-07-21 23:00:00	2.31111	4.03219		2014-03-22 12:00:00	0.051
2013-07-22	2.60694	3.38019		2014-03-23 12:00:00	0.063
2013-07-22 01:00:00	2.63646	2.23709		2014-03-24 12:00:00	0.049
2013-07-22 02:00:00	2.94583	2.62466		2014-03-25 12:00:00	0.06
2013-07-22 03:00:00	2.53299	2.68072		2014-03-26 12:00:00	0.069
2013-07-22 04:00:00	1.87361	3.14243		2014-03-27 12:00:00	0.07
2013-07-22 05:00:00	1.70069	3.4367		2014-03-28 12:00:00	0.051
2013-07-22 06:00:00	2.31771	3.09013		2014-03-29 12:00:00	0.058
2013-07-22 07:00:00	1.62465	3.85352		2014-03-30 12:00:00	0.05
2013-07-22 08:00:00	2.65729	3.38826		2014-03-31 12:00:00	0.078
2013-07-22 09:00:00	2.36215	4.02406		2014-04-01 12:00:00	0.069
2013-07-22 10:00:00	3.39757	3.58216		2014-04-02 12:00:00	0.076
2013-07-22 11:00:00	3.57292	3.85758		2014-04-03 12:00:00	0.05
2013-07-22 12:00:00	3.29896	4.09725		2014-04-04 12:00:00	0.045
2013-07-22 13:00:00	2.82292	3.96718		2014-04-05 12:00:00	0.074
2013-07-22 14:00:00	2.82222	4.66462		2014-04-06 12:00:00	0.055
2013-07-22 15:00:00	3.48854	5.22777		2014-04-07 12:00:00	0.03
2013-07-22 16:00:00	3.36111	5.07528		2014-04-08 12:00:00	0.032
2013-07-22 17:00:00	3.44306	5.33924		2014-04-09 12:00:00	0.036
2013-07-22 18:00:00	2.81632	5.16591		2014-04-10 12:00:00	0.045
2013-07-22 19:00:00	2.47604	4.70149		2014-04-11 12:00:00	0.061
2013-07-22 20:00:00	2.59514	2.35281		2014-04-12 12:00:00	0.057
2013-07-22 21:00:00	2.05729	2.20519		2014-04-13 12:00:00	0.033
2013-07-22 22:00:00	1.86354	1.05895		2014-04-14 12:00:00	0.038
2013-07-22 23:00:00	1.6875	0.52724		2014-04-15 12:00:00	0.055
2013-07-23	0.711111	-0.24108		2014-04-16 12:00:00	0.052
2013-07-23 01:00:00	0.201736	-0.76415		2014-04-17 12:00:00	0.08
2013-07-23 02:00:00	0.507986	-0.12374		2014-04-18 12:00:00	0.045
2013-07-23 03:00:00	0.682639	0.49187		2014-04-19 12:00:00	0.019
2013-07-23 04:00:00	1.78889	0.47615		2014-04-20 12:00:00	-0.001
2013-07-23 05:00:00	0.623958	1.84698		2014-04-21 12:00:00	0.032
2013-07-23 06:00:00	0.75868	3.75217		2014-04-22 12:00:00	0.026
2013-07-23 07:00:00	0.947569	4.882		2014-04-23 12:00:00	0.024
2013-07-23 08:00:00	1.01597	5.30206		2014-04-24 12:00:00	0.002
2013-07-23 09:00:00	2.42847	6.15349		2014-04-25 12:00:00	0.016
2013-07-23 10:00:00	1.69861	7.33335		2014-04-26 12:00:00	0.012
2013-07-23 11:00:00	3.07812	7.98713		2014-04-27 12:00:00	0.027
2013-07-23 12:00:00	2.98194	9.06621		2014-04-28 12:00:00	0.024
2013-07-23 13:00:00	2.94479	9.27651		2014-04-29 12:00:00	0.049
2013-07-23 14:00:00	2.68472	9.47437		2014-04-30 12:00:00	0.082
2013-07-23 15:00:00	2.3625	9.12747		2014-05-01 12:00:00	0.117
2013-07-23 16:00:00	2.91424	8.83053		2014-05-02 12:00:00	0.134
2013-07-23 17:00:00	2.6184	9.9832		2014-05-03 12:00:00	0.075
2013-07-23 18:00:00	2.95208	9.6155		2014-05-04 12:00:00	0.054
2013-07-23 19:00:00	2.04132	9.54489		2014-05-05 12:00:00	0.104
2013-07-23 20:00:00	1.34514	8.13334		2014-05-06 12:00:00	0.043
2013-07-23 21:00:00	0.980208	6.12842		2014-05-07 12:00:00	0.043
2013-07-23 22:00:00	0.340278	6.27893		2014-05-08 12:00:00	0.039
2013-07-23 23:00:00	0.623264	5.78678		2014-05-09 12:00:00	0.047
2013-07-24	0.976736	5.71616		2014-05-10 12:00:00	0.062
2013-07-24 01:00:00	1.46562	4.75478		2014-05-11 12:00:00	0.041
2013-07-24 02:00:00	1.21875	4.17458		2014-05-12 12:00:00	0.063
2013-07-24 03:00:00	0.707986	3.30759		2014-05-13 12:00:00	0.107
2013-07-24 04:00:00	1.11736	5.55024
2013-07-24 05:00:00	0.717708	7.083
2013-07-24 06:00:00	0.765625	8.66958
2013-07-24 07:00:00	1.52153	8.51774
2013-07-24 08:00:00	1.51007	7.5292
2013-07-24 09:00:00	1.35382	7.22715
2013-07-24 10:00:00	1.62778	8.21951
2013-07-24 11:00:00	2.26458	9.20633
2013-07-24 12:00:00	1.90556	10.0989
2013-07-24 13:00:00	1.78924	10.8524
2013-07-24 14:00:00	1.55556	12.3932
2013-07-24 15:00:00	1.8566	12.2119
2013-07-24 16:00:00	1.44965	12.4118
2013-07-24 17:00:00	0.886458	14.3953
2013-07-24 18:00:00	1.26285	14.4342
2013-07-24 19:00:00	1.94097	13.9504
2013-07-24 20:00:00	2.61944	11.7042
2013-07-24 21:00:00	2.20972	10.1301
2013-07-24 22:00:00	2.90764	10.4654
2013-07-24 23:00:00	4.67708	11.1605
2013-07-25	5.09236	11.4248
2013-07-25 01:00:00	4.65555	11.1515
2013-07-25 02:00:00	3.65694	10.5102
2013-07-25 03:00:00	4.1684	10.5282
2013-07-25 04:00:00	4.27882	11.1696
2013-07-25 05:00:00	4.10694	11.879
2013-07-25 06:00:00	4.8809	11.9435
2013-07-25 07:00:00	4.0066	10.2863
2013-07-25 08:00:00	4.10104	9.84115
2013-07-25 09:00:00	4.90313	9.75698
2013-07-25 10:00:00	4.4191	9.71273
2013-07-25 11:00:00	3.50382	4.62367
2013-07-25 12:00:00	1.85243	4.37024
2013-07-25 13:00:00	2.4066	4.77529
2013-07-25 14:00:00	3.90104	4.6933
2013-07-25 15:00:00	3.51597	4.882
2013-07-25 16:00:00	3.51875	4.52548
2013-07-25 17:00:00	3.31424	4.47234
2013-07-25 18:00:00	2.75764	4.4846
2013-07-25 19:00:00	1.84722	5.2938
2013-07-25 20:00:00	1.51389	5.19065
2013-07-25 21:00:00	1.60174	5.00943
2013-07-25 22:00:00	0.446528	5.03
2013-07-25 23:00:00	1.06944	4.70149
2013-07-26	0.811458	4.4274
2013-07-26 01:00:00	1.49063	3.11024
2013-07-26 02:00:00	1.45278	3.13036
2013-07-26 03:00:00	1.16389	3.49728
2013-07-26 04:00:00	1.10243	3.98342
2013-07-26 05:00:00	1.26736	3.32372
2013-07-26 06:00:00	1.14097	3.62666
2013-07-26 07:00:00	1.02118	3.81297
2013-07-26 08:00:00	0.577778	4.17865
2013-07-26 09:00:00	0.919444	4.57456
2013-07-26 10:00:00	0.886806	5.87412
2013-07-26 11:00:00	2.46007	4.77118
2013-07-26 12:00:00	2.21979	5.20714
2013-07-26 13:00:00	2.52188	4.94363
2013-07-26 14:00:00	0.846181	6.70715
2013-07-26 15:00:00	1.13507	8.42249
2013-07-26 16:00:00	1.39132	8.93516
2013-07-26 17:00:00	1.54444	9.08808
2013-07-26 18:00:00	2.52674	7.40992
2013-07-26 19:00:00	1.72292	6.46333
2013-07-26 20:00:00	1.5625	6.14095
2013-07-26 21:00:00	0.568403	6.82095
2013-07-26 22:00:00	1.09792	6.4088
2013-07-26 23:00:00	1.10938	6.32499
2013-07-27	1.9441	6.00324
2013-07-27 01:00:00	1.97986	5.47156
2013-07-27 02:00:00	1.12639	5.51296
2013-07-27 03:00:00	1.13681	5.25252
2013-07-27 04:00:00	0.408681	5.05469
2013-07-27 05:00:00	0.621528	5.34337
2013-07-27 06:00:00	1.09549	5.75769
2013-07-27 07:00:00	2.54514	4.09725
2013-07-27 08:00:00	2.56354	4.35392
2013-07-27 09:00:00	3.69201	5.56267
2013-07-27 10:00:00	5.80347	5.42605
2013-07-27 11:00:00	5.6566	5.3847
2013-07-27 12:00:00	5.27639	4.93541
2013-07-27 13:00:00	4.75417	5.36816
2013-07-27 14:00:00	4.16111	5.72861
2013-07-27 15:00:00	3.7066	5.76185
2013-07-27 16:00:00	3.65417	5.52125
2013-07-27 17:00:00	2.51736	6.14513
2013-07-27 18:00:00	2.17257	7.07877
2013-07-27 19:00:00	1.77674	6.5305
2013-07-27 20:00:00	1.33403	5.30206
2013-07-27 21:00:00	0.376389	5.84084
2013-07-27 22:00:00	1.075	5.07939
2013-07-27 23:00:00	1.72639	4.94363
2013-07-28	3.41875	4.21123
2013-07-28 01:00:00	3.27118	5.08351
2013-07-28 02:00:00	3.3618	5.61656
2013-07-28 03:00:00	4.03993	5.33511
2013-07-28 04:00:00	4.90278	5.55439
2013-07-28 05:00:00	5.22674	5.92408
2013-07-28 06:00:00	4.88854	6.22455
2013-07-28 07:00:00	4.71319	6.14931
2013-07-28 08:00:00	4.18438	6.70715
2013-07-28 09:00:00	4.73889	7.13808
2013-07-28 10:00:00	5.68993	6.5347
2013-07-28 11:00:00	4.25417	3.43266
2013-07-28 12:00:00	4.73368	3.23907
2013-07-28 13:00:00	5.82882	3.44477
2013-07-28 14:00:00	5.55347	3.73191
2013-07-28 15:00:00	3.68125	4.45599
2013-07-28 16:00:00	3.35069	4.84094
2013-07-28 17:00:00	3.90868	4.804
2013-07-28 18:00:00	3.99861	4.76298
2013-07-28 19:00:00	3.90104	4.4029
2013-07-28 20:00:00	4.10347	4.09318
2013-07-28 21:00:00	3.79514	3.69142
2013-07-28 22:00:00	4.24097	2.94543
2013-07-28 23:00:00	3.33958	2.20918
2013-07-29	2.43472	1.54143
2013-07-29 01:00:00	1.69653	1.37511
2013-07-29 02:00:00	1.59965	0.25629
2013-07-29 03:00:00	1.1125	0.42115
2013-07-29 04:00:00	1.15278	0.70424
2013-07-29 05:00:00	1.10868	2.25703
2013-07-29 06:00:00	0.892014	3.46092
2013-07-29 07:00:00	0.632986	4.15015
2013-07-29 08:00:00	1.05486	4.37841
2013-07-29 09:00:00	1.61667	4.32536
2013-07-29 10:00:00	1.28576	5.35577
2013-07-29 11:00:00	2.25833	4.96008
2013-07-29 12:00:00	3.11771	4.84094
2013-07-29 13:00:00	3.07535	5.08351
2013-07-29 14:00:00	4.12396	5.52953
2013-07-29 15:00:00	5.69479	5.40537
2013-07-29 16:00:00	6.31979	5.04646
2013-07-29 17:00:00	6.5316	4.91076
2013-07-29 18:00:00	6.27049	4.97241
2013-07-29 19:00:00	5.21736	4.5541
2013-07-29 20:00:00	3.85521	4.19901
2013-07-29 21:00:00	3.4934	4.18272
2013-07-29 22:00:00	4.04618	3.62666
2013-07-29 23:00:00	2.13125	3.65094
2013-07-30	1.12326	2.00206
2013-07-30 01:00:00	2.49549	0.27591
2013-07-30 02:00:00	2.44618	0.00544
2013-07-30 03:00:00	2.27222	0.68456
2013-07-30 04:00:00	1.53125	1.8152
2013-07-30 05:00:00	1.02639	2.81298
2013-07-30 06:00:00	1.05417	1.73577
2013-07-30 07:00:00	0.665278	2.97355
2013-07-30 08:00:00	0.282292	3.80891
2013-07-30 09:00:00	1.07118	4.56638
2013-07-30 10:00:00	1.40764	5.25665
2013-07-30 11:00:00	1.21528	6.55571
2013-07-30 12:00:00	2.6125	6.12007
2013-07-30 13:00:00	2.82361	6.32917
2013-07-30 14:00:00	3.20694	6.0825
2013-07-30 15:00:00	3.48472	6.1911
2013-07-30 16:00:00	2.69306	6.5389
2013-07-30 17:00:00	2.42535	6.34593
2013-07-30 18:00:00	4.27118	4.73838
2013-07-30 19:00:00	3.48924	4.46008
2013-07-30 20:00:00	2.84514	4.37841
2013-07-30 21:00:00	2.66493	4.64414
2013-07-30 22:00:00	5.43264	3.70356
2013-07-30 23:00:00	5.06319	3.65498
2013-07-31	5.87188	3.50132
2013-07-31 01:00:00	4.90903	3.36405
2013-07-31 02:00:00	6.17951	2.99766
2013-07-31 03:00:00	7.01111	2.65268
2013-07-31 04:00:00	7.37292	2.34083
2013-07-31 05:00:00	6.75174	2.42869
2013-07-31 06:00:00	7.75104	2.82903
2013-07-31 07:00:00	6.74375	3.07002
2013-07-31 08:00:00	6.97882	3.38019
2013-07-31 09:00:00	6.76701	3.68332
2013-07-31 10:00:00	6.31285	4.02406
2013-07-31 11:00:00	5.3743	5.22364
2013-07-31 12:00:00	5.39236	6.22873
2013-07-31 13:00:00	7.19965	6.27056
2013-07-31 14:00:00	8.98125	4.53365
2013-07-31 15:00:00	10.5288	3.42862
2013-07-31 16:00:00	11.2465	3.67117
2013-07-31 17:00:00	10.9385	3.37615
2013-07-31 18:00:00	10.4129	3.08208
2013-07-31 19:00:00	9.48576	3.2431
2013-07-31 20:00:00	8.19549	3.66308
2013-07-31 21:00:00	6.01944	4.27235
2013-07-31 22:00:00	2.95625	4.39882
2013-07-31 23:00:00	1.81181	3.76433
2013-08-01	0.868055	1.9225
2013-08-01 01:00:00	2.42951	1.482
2013-08-01 02:00:00	1.80868	0.91301
2013-08-01 03:00:00	1.59792	1.4622
2013-08-01 04:00:00	1.53403	2.7328
2013-08-01 05:00:00	0.780555	3.29549
2013-08-01 06:00:00	1.36354	3.38826
2013-08-01 07:00:00	1.43611	4.70969
2013-08-01 08:00:00	1.2316	6.37945
2013-08-01 09:00:00	1.33229	7.25687
2013-08-01 10:00:00	1.68681	8.06019
2013-08-01 11:00:00	1.10243	9.65525
2013-08-01 12:00:00	0.991667	9.50081
2013-08-01 13:00:00	0.869444	10.197
2013-08-01 14:00:00	1.05313	10.8118
2013-08-01 15:00:00	1.13819	11.0607
2013-08-01 16:00:00	1.50347	11.0335
2013-08-01 17:00:00	2.23056	11.0833
2013-08-01 18:00:00	3.02292	10.7938
2013-08-01 19:00:00	2.12812	10.6226
2013-08-01 20:00:00	0.984028	8.13765
2013-08-01 21:00:00	0.826736	8.3879
2013-08-01 22:00:00	0.777431	7.9356
2013-08-01 23:00:00	0.753819	7.23989
2013-08-02	0.613889	6.60195
2013-08-02 01:00:00	0.552083	5.95323
2013-08-02 02:00:00	0.530208	5.24427
2013-08-02 03:00:00	0.315625	5.19477
2013-08-02 04:00:00	0.901389	5.12882
2013-08-02 05:00:00	0.991667	5.59169
2013-08-02 06:00:00	0.957986	6.5347
2013-08-02 07:00:00	0.975347	7.6658
2013-08-02 08:00:00	0.890278	9.21509
2013-08-02 09:00:00	1.57465	8.62616
2013-08-02 10:00:00	1.74306	9.00502
2013-08-02 11:00:00	1.51875	10.7216
2013-08-02 12:00:00	1.97569	10.7216
2013-08-02 13:00:00	2.89236	11.4156
2013-08-02 14:00:00	3.10556	11.0652
2013-08-02 15:00:00	2.59618	11.2606
2013-08-02 16:00:00	2.25833	11.6582
2013-08-02 17:00:00	1.63194	10.9836
2013-08-02 18:00:00	1.68472	10.3489
2013-08-02 19:00:00	1.65764	8.98754
2013-08-02 20:00:00	1.35486	7.86697
2013-08-02 21:00:00	0.718403	8.23676
2013-08-02 22:00:00	1.37708	6.3208
2013-08-02 23:00:00	1.33507	6.24546
2013-08-03	1.15903	5.3971
2013-08-03 01:00:00	1.55451	5.36816
2013-08-03 02:00:00	0.844792	5.48812
2013-08-03 03:00:00	0.701042	5.80341
2013-08-03 04:00:00	0.890278	5.47156
2013-08-03 05:00:00	1.96528	5.30619
2013-08-03 06:00:00	2.39861	4.63595
2013-08-03 07:00:00	1.69861	4.75888
2013-08-03 08:00:00	1.90347	5.09586
2013-08-03 09:00:00	2.91007	5.24427
2013-08-03 10:00:00	2.47187	5.5834
2013-08-03 11:00:00	2.4441	5.92408
2013-08-03 12:00:00	2.16076	5.53367
2013-08-03 13:00:00	3.24965	5.50468
2013-08-03 14:00:00	3.50868	6.29568
2013-08-03 15:00:00	4.11667	6.56832
2013-08-03 16:00:00	4.5934	6.47172
2013-08-03 17:00:00	3.98715	6.5179
2013-08-03 18:00:00	5.03333	6.81673
2013-08-03 19:00:00	4.96493	6.26638
2013-08-03 20:00:00	4.27153	5.84084
2013-08-03 21:00:00	2.99896	5.10822
2013-08-03 22:00:00	3.27674	4.85326
2013-08-03 23:00:00	2.24688	4.43557
2013-08-04	2.86701	3.72381
2013-08-04 01:00:00	2.92326	2.94142
2013-08-04 02:00:00	2.37569	3.01775
2013-08-04 03:00:00	1.84757	3.04991
2013-08-04 04:00:00	2.70868	3.67117
2013-08-04 05:00:00	4.01319	3.74002
2013-08-04 06:00:00	2.95451	4.04845
2013-08-04 07:00:00	2.69097	4.6933
2013-08-04 08:00:00	2.83438	4.75068
2013-08-04 09:00:00	2.34236	5.5171
2013-08-04 10:00:00	3.35035	6.05746
2013-08-04 11:00:00	1.87187	7.3206
2013-08-04 12:00:00	4.43611	7.0449
2013-08-04 13:00:00	5.54514	7.083
2013-08-04 14:00:00	6.06493	7.2866
2013-08-04 15:00:00	7.18264	6.55571
2013-08-04 16:00:00	7.45764	6.4088
2013-08-04 17:00:00	6.9191	6.12842
2013-08-04 18:00:00	6.18472	5.94907
2013-08-04 19:00:00	5.77465	5.49226
2013-08-04 20:00:00	4.99201	4.84915
2013-08-04 21:00:00	3.61007	4.48051
2013-08-04 22:00:00	1.56146	4.16643
2013-08-04 23:00:00	1.60417	3.39229
2013-08-05	0.7875	2.86113
2013-08-05 01:00:00	0.986458	2.20918
2013-08-05 02:00:00	0.564583	2.21715
2013-08-05 03:00:00	0.70243	1.93841
2013-08-05 04:00:00	1.22257	1.2446
2013-08-05 05:00:00	1.01007	1.88672
2013-08-05 06:00:00	0.813889	3.91845
2013-08-05 07:00:00	0.99375	4.51321
2013-08-05 08:00:00	1.04514	5.22364
2013-08-05 09:00:00	1.16389	7.3291
2013-08-05 10:00:00	2.70139	7.06607
2013-08-05 11:00:00	2.81493	7.77273
2013-08-05 12:00:00	2.61354	9.02686
2013-08-05 13:00:00	2.00833	9.7437
2013-08-05 14:00:00	1.94549	10.4026
2013-08-05 15:00:00	1.85174	11.3062
2013-08-05 16:00:00	1.84132	11.4522
2013-08-05 17:00:00	2.48715	11.4065
2013-08-05 18:00:00	2.22292	11.7547
2013-08-05 19:00:00	1.5125	10.6856
2013-08-05 20:00:00	1.07049	9.27651
2013-08-05 21:00:00	0.481597	9.84558
2013-08-05 22:00:00	0.545139	7.67008
2013-08-05 23:00:00	0.800347	6.16602
2013-08-06	0.58125	4.56638
2013-08-06 01:00:00	0.363889	4.65643
2013-08-06 02:00:00	0.494097	5.04646
2013-08-06 03:00:00	0.376389	4.76298
2013-08-06 04:00:00	0.32118	4.81221
2013-08-06 05:00:00	0.550347	5.45915
2013-08-06 06:00:00	0.972917	7.96995
2013-08-06 07:00:00	0.44618	9.30725
2013-08-06 08:00:00	0.721875	10.6676
2013-08-06 09:00:00	0.720486	13.0732
2013-08-06 10:00:00	1.84167	12.4724
2013-08-06 11:00:00	1.70625	12.9977
2013-08-06 12:00:00	1.87778	13.7822
2013-08-06 13:00:00	2.30104	12.8799
2013-08-06 14:00:00	2.97222	11.4613
2013-08-06 15:00:00	1.3059	13.5479
2013-08-06 16:00:00	1.2066	13.2151
2013-08-06 17:00:00	1.8941	12.4678
2013-08-06 18:00:00	3.78542	11.1469
2013-08-06 19:00:00	3.54479	11.0425
2013-08-06 20:00:00	2.88611	11.0969
2013-08-06 21:00:00	2.07326	10.7892
2013-08-06 22:00:00	1.2684	9.00938
2013-08-06 23:00:00	1.6934	8.15918
2013-08-07	1.39618	7.30785
2013-08-07 01:00:00	1.53264	7.91844
2013-08-07 02:00:00	2.49236	8.70869
2013-08-07 03:00:00	1.75625	8.49608
2013-08-07 04:00:00	1.84132	8.75653
2013-08-07 05:00:00	2.07187	9.10996
2013-08-07 06:00:00	1.38611	10.1167
2013-08-07 07:00:00	1.90243	11.37
2013-08-07 08:00:00	2.18958	13.6625
2013-08-07 09:00:00	1.80139	14.0467
2013-08-07 10:00:00	1.43889	13.2815
2013-08-07 11:00:00	1.12813	15.3981
2013-08-07 12:00:00	2.47465	14.5511
2013-08-07 13:00:00	2.58854	14.1578
2013-08-07 14:00:00	2.47014	13.9311
2013-08-07 15:00:00	3.33507	10.9565
2013-08-07 16:00:00	3.42708	11.3791
2013-08-07 17:00:00	2.5934	10.3668
2013-08-07 18:00:00	3.18542	9.40395
2013-08-07 19:00:00	3.21146	9.91213
2013-08-07 20:00:00	4.16181	9.04435
2013-08-07 21:00:00	5.0441	10.5866
2013-08-07 22:00:00	4.04514	11.1242
2013-08-07 23:00:00	3.90729	11.1923
2013-08-08	4.8125	10.9565
2013-08-08 01:00:00	2.7559	10.0455
2013-08-08 02:00:00	5.26215	9.87663
2013-08-08 03:00:00	4.47326	8.95698
2013-08-08 04:00:00	2.94097	8.47443
2013-08-08 05:00:00	3.23854	8.78263
2013-08-08 06:00:00	5.19167	9.17565
2013-08-08 07:00:00	5.88438	8.73043
2013-08-08 08:00:00	5.87847	8.54374
2013-08-08 09:00:00	6.98819	8.06019
2013-08-08 10:00:00	7.23646	7.8584
2013-08-08 11:00:00	7.80799	7.77701
2013-08-08 12:00:00	8.02153	7.98283
2013-08-08 13:00:00	8.23472	7.57613
2013-08-08 14:00:00	6.81354	6.87581
2013-08-08 15:00:00	6.76562	6.9899
2013-08-08 16:00:00	6.03542	7.89699
2013-08-08 17:00:00	4.91875	9.35118
2013-08-08 18:00:00	7.61424	10.6361
2013-08-08 19:00:00	7.68056	10.0143
2013-08-08 20:00:00	6.03437	9.46116
2013-08-08 21:00:00	6.38438	8.71739
2013-08-08 22:00:00	4.73854	8.22382
2013-08-08 23:00:00	2.82222	7.39715
2013-08-09	2.64062	6.86315
2013-08-09 01:00:00	2.71146	6.27056
2013-08-09 02:00:00	2.96458	5.3475
2013-08-09 03:00:00	2.94722	4.6892
2013-08-09 04:00:00	1.17535	4.27643
2013-08-09 05:00:00	3.25174	4.94363
2013-08-09 06:00:00	3.62847	5.56682
2013-08-09 07:00:00	4.23993	6.20364
2013-08-09 08:00:00	3.92292	7.64444
2013-08-09 09:00:00	2.38507	9.80569
2013-08-09 10:00:00	4.80764	8.87846
2013-08-09 11:00:00	5.01736	8.20227
2013-08-09 12:00:00	5.47951	8.41384
2013-08-09 13:00:00	5.11389	8.29717
2013-08-09 14:00:00	4.26736	8.90462
2013-08-09 15:00:00	3.48472	7.90986
2013-08-09 16:00:00	2.76701	7.58039
2013-08-09 17:00:00	2.36215	7.16352
2013-08-09 18:00:00	2.47951	7.56759
2013-08-09 19:00:00	1.36979	7.50789
2013-08-09 20:00:00	2.11493	8.14626
2013-08-09 21:00:00	1.64896	7.12961
2013-08-09 22:00:00	1.5493	6.22455
2013-08-09 23:00:00	1.1559	4.73428
2013-08-10	1.12187	3.51748
2013-08-10 01:00:00	0.972222	3.15853
2013-08-10 02:00:00	1.96875	2.72479
2013-08-10 03:00:00	2.13958	3.05393
2013-08-10 04:00:00	1.55451	3.57003
2013-08-10 05:00:00	1.17083	4.56228
2013-08-10 06:00:00	1.37639	6.19946
2013-08-10 07:00:00	0.651042	8.25833
2013-08-10 08:00:00	0.777431	9.13623
2013-08-10 09:00:00	0.717708	10.6991
2013-08-10 10:00:00	1.5309	10.9972
2013-08-10 11:00:00	2.59444	11.8974
2013-08-10 12:00:00	3.15625	11.9297
2013-08-10 13:00:00	2.79167	11.9989
2013-08-10 14:00:00	2.74549	12.059
2013-08-10 15:00:00	1.34583	13.6434
2013-08-10 16:00:00	1.88056	12.7719
2013-08-10 17:00:00	1.15451	12.8752
2013-08-10 18:00:00	0.979514	13.8542
2013-08-10 19:00:00	1.00486	13.0637
2013-08-10 20:00:00	0.338889	13.5288
2013-08-10 21:00:00	0.928819	11.1515
2013-08-10 22:00:00	1.08403	9.56695
2013-08-10 23:00:00	0.621181	7.61027
2013-08-11	1.21389	7.38864
2013-08-11 01:00:00	0.956597	7.36311
2013-08-11 02:00:00	0.496528	8.74783
2013-08-11 03:00:00	0.443055	7.90986
2013-08-11 04:00:00	0.363889	8.41384
2013-08-11 05:00:00	0.539583	8.03869
2013-08-11 06:00:00	0.929861	8.39222
2013-08-11 07:00:00	0.860764	9.07058
2013-08-11 08:00:00	1.34722	10.6406
2013-08-11 09:00:00	1.56597	11.0652
2013-08-11 10:00:00	1.75451	10.5417
2013-08-11 11:00:00	1.59757	12.1516
2013-08-11 12:00:00	1.88021	14.1481
2013-08-11 13:00:00	1.90035	15.873
2013-08-11 14:00:00	2.27569	13.272
2013-08-11 15:00:00	1.3191	12.3652
2013-08-11 16:00:00	1.65868	12.3559
2013-08-11 17:00:00	0.783681	11.5757
2013-08-11 18:00:00	1.36389	11.5528
2013-08-11 19:00:00	1.97083	11.6491
2013-08-11 20:00:00	1.4066	12.2676
2013-08-11 21:00:00	1.54444	11.4019
2013-08-11 22:00:00	0.72743	10.7802
2013-08-11 23:00:00	1.50104	9.23702
2013-08-12	1.67257	9.45676
2013-08-12 01:00:00	1.27569	7.87984
2013-08-12 02:00:00	1.74236	5.9699
2013-08-12 03:00:00	1.94687	4.74248
2013-08-12 04:00:00	1.19479	4.37433
2013-08-12 05:00:00	0.865625	5.40124
2013-08-12 06:00:00	0.917708	6.4046
2013-08-12 07:00:00	0.589583	8.36196
2013-08-12 08:00:00	3.01562	7.07877
2013-08-12 09:00:00	1.87639	7.02797
2013-08-12 10:00:00	1.09062	8.10751
2013-08-12 11:00:00	1.3809	10.2282
2013-08-12 12:00:00	3.69861	8.28422
2013-08-12 13:00:00	3.67569	7.70428
2013-08-12 14:00:00	3.0316	8.07739
2013-08-12 15:00:00	3.60938	8.7
2013-08-12 16:00:00	3.18021	8.31012
2013-08-12 17:00:00	4.05868	7.84983
2013-08-12 18:00:00	4.96042	7.63163
2013-08-12 19:00:00	5.17222	8.29285
2013-08-12 20:00:00	3.70208	8.56976
2013-08-12 21:00:00	3.49826	8.53074
2013-08-12 22:00:00	1.85139	6.57672
2013-08-12 23:00:00	1.82986	4.13387
2013-08-13	2.18646	3.23102
2013-08-13 01:00:00	3.79514	2.38076
2013-08-13 02:00:00	2.39097	2.90126
2013-08-13 03:00:00	2.32431	2.56063
2013-08-13 04:00:00	1.32847	2.88521
2013-08-13 05:00:00	1.65799	4.92719
2013-08-13 06:00:00	1.25833	7.01528
2013-08-13 07:00:00	1.36875	10.09
2013-08-13 08:00:00	2.6684	10.6991
2013-08-13 09:00:00	7.84618	10.7802
2013-08-13 10:00:00	7.44271	9.86332
2013-08-13 11:00:00	6.89722	9.69504
2013-08-13 12:00:00	6.84653	10.197
2013-08-13 13:00:00	7.93819	10.1657
2013-08-13 14:00:00	9.33056	9.34679
2013-08-13 15:00:00	10.0281	8.91771
2013-08-13 16:00:00	9.53333	8.49608
2013-08-13 17:00:00	8.03924	8.03869
2013-08-13 18:00:00	7.11979	6.97721
2013-08-13 19:00:00	7.15243	6.68609
2013-08-13 20:00:00	5.83299	6.5095
2013-08-13 21:00:00	5.72049	5.99074
2013-08-13 22:00:00	4.57847	5.68294
2013-08-13 23:00:00	4.11181	5.05469
2013-08-14	4.17326	4.59911
2013-08-14 01:00:00	5.59618	3.8373
2013-08-14 02:00:00	5.32674	3.7927
2013-08-14 03:00:00	2.06736	3.27131
2013-08-14 04:00:00	1.94792	3.17061
2013-08-14 05:00:00	1.77118	2.13744
2013-08-14 06:00:00	1.38194	3.76027
2013-08-14 07:00:00	0.904167	5.88245
2013-08-14 08:00:00	2.40174	6.13678
2013-08-14 09:00:00	4.22708	6.01575
2013-08-14 10:00:00	3.63889	5.93241
2013-08-14 11:00:00	3.55556	4.83683
2013-08-14 12:00:00	1.82118	5.19889
2013-08-14 13:00:00	0.997569	5.87412
2013-08-14 14:00:00	1.52778	6.5053
2013-08-14 15:00:00	2.17674	6.62297
2013-08-14 16:00:00	1.33507	4.37433
2013-08-14 17:00:00	0.635069	3.93063
2013-08-14 18:00:00	2.47187	4.26012
2013-08-14 19:00:00	3.07917	4.43148
2013-08-14 20:00:00	2.42743	4.32536
2013-08-14 21:00:00	2.30486	4.41923
2013-08-14 22:00:00	2.21667	4.08098
2013-08-14 23:00:00	1.47361	3.50132
2013-08-15	1.29618	3.42055
2013-08-15 01:00:00	0.201736	3.27534
2013-08-15 02:00:00	0.329167	3.09013
2013-08-15 03:00:00	0.400347	3.04991
2013-08-15 04:00:00	0.431944	3.10622
2013-08-15 05:00:00	0.438542	3.45689
2013-08-15 06:00:00	0.359375	3.32775
2013-08-15 07:00:00	0.278819	3.35598
2013-08-15 08:00:00	0.582986	3.52961
2013-08-15 09:00:00	1.17951	3.6307
2013-08-15 10:00:00	2.33646	3.88598
2013-08-15 11:00:00	2.05	3.8941
2013-08-15 12:00:00	2.88333	5.10822
2013-08-15 13:00:00	5.17049	5.03
2013-08-15 14:00:00	5.26875	4.04032
2013-08-15 15:00:00	5.83785	3.54577
2013-08-15 16:00:00	7.07361	2.9856
2013-08-15 17:00:00	8.47708	2.51263
2013-08-15 18:00:00	8.90035	1.9225
2013-08-15 19:00:00	7.64236	1.43844
2013-08-15 20:00:00	7.92222	1.31181
2013-08-15 21:00:00	7.40937	1.3395
2013-08-15 22:00:00	8.36771	1.48993
2013-08-15 23:00:00	7.38993	1.13397
2013-08-16	6.09687	1.09448
2013-08-16 01:00:00	5.64687	1.09053
2013-08-16 02:00:00	6.33576	0.68849
2013-08-16 03:00:00	6.33819	0.51545
2013-08-16 04:00:00	4.63819	0.60194
2013-08-16 05:00:00	6.46805	0.93272
2013-08-16 06:00:00	6.78403	0.78692
2013-08-16 07:00:00	5.64896	0.51938
2013-08-16 08:00:00	4.60799	0.94849
2013-08-16 09:00:00	5.12812	1.4622
2013-08-16 10:00:00	4.79931	1.31181
2013-08-16 11:00:00	5.41215	1.33159
2013-08-16 12:00:00	6.69201	1.60882
2013-08-16 13:00:00	4.97708	1.37907
2013-08-16 14:00:00	5.25833	0.99582
2013-08-16 15:00:00	4.11597	1.59296
2013-08-16 16:00:00	3.88889	1.89467
2013-08-16 17:00:00	3.33819	1.91455
2013-08-16 18:00:00	4.02951	1.46616
2013-08-16 19:00:00	4.42257	1.76357
2013-08-16 20:00:00	4.79826	1.58503
2013-08-16 21:00:00	5.24965	1.39886
2013-08-16 22:00:00	4.12083	1.52558
2013-08-16 23:00:00	3.75833	1.97421
2013-08-17	2.4566	2.014
2013-08-17 01:00:00	1.54097	1.28413
2013-08-17 02:00:00	2.12326	1.60089
2013-08-17 03:00:00	2.57847	1.62865
2013-08-17 04:00:00	4.12569	1.51369
2013-08-17 05:00:00	5.28819	1.75165
2013-08-17 06:00:00	3.73993	1.72387
2013-08-17 07:00:00	2.55938	1.77151
2013-08-17 08:00:00	3.47465	2.13345
2013-08-17 09:00:00	3.85139	2.269
2013-08-17 10:00:00	2.86875	1.92648
2013-08-17 11:00:00	1.87639	2.08167
2013-08-17 12:00:00	1.23403	1.86685
2013-08-17 13:00:00	1.98611	2.48864
2013-08-17 14:00:00	1.9316	2.61265
2013-08-17 15:00:00	1.89965	2.55263
2013-08-17 16:00:00	1.62326	2.50863
2013-08-17 17:00:00	1.58194	2.75284
2013-08-17 18:00:00	0.874653	3.07404
2013-08-17 19:00:00	1.18646	2.59264
2013-08-17 20:00:00	1.27951	2.26501
2013-08-17 21:00:00	1.4691	2.24906
2013-08-17 22:00:00	1.25035	2.23709
2013-08-17 23:00:00	1.01701	2.11752
2013-08-18	1.25035	1.26436
2013-08-18 01:00:00	1.4691	1.26831
2013-08-18 02:00:00	1.18403	0.89724
2013-08-18 03:00:00	1.91875	0.70424
2013-08-18 04:00:00	2.27708	0.39366
2013-08-18 05:00:00	1.03438	0.38581
2013-08-18 06:00:00	1.22292	0.93666
2013-08-18 07:00:00	1.48368	2.10955
2013-08-18 08:00:00	0.897222	2.72879
2013-08-18 09:00:00	2.23403	3.34388
2013-08-18 10:00:00	2.18819	3.63879
2013-08-18 11:00:00	2.20243	3.93875
2013-08-18 12:00:00	2.03056	4.10539
2013-08-18 13:00:00	2.05764	4.52548
2013-08-18 14:00:00	2.32604	5.21539
2013-08-18 15:00:00	1.81319	5.46329
2013-08-18 16:00:00	1.45347	5.46742
2013-08-18 17:00:00	1.80868	5.07116
2013-08-18 18:00:00	1.91181	4.08911
2013-08-18 19:00:00	1.15104	3.93063
2013-08-18 20:00:00	0.817708	3.89815
2013-08-18 21:00:00	1.075	3.95093
2013-08-18 22:00:00	0.936111	3.52152
2013-08-18 23:00:00	1.45868	3.05795
2013-08-19	1.80174	2.52863
2013-08-19 01:00:00	1.66076	2.00206
2013-08-19 02:00:00	1.25833	2.39673
2013-08-19 03:00:00	1.17118	2.44068
2013-08-19 04:00:00	0.935417	2.46066
2013-08-19 05:00:00	1.14792	1.79931
2013-08-19 06:00:00	1.6941	2.77288
2013-08-19 07:00:00	1.17951	3.40844
2013-08-19 08:00:00	0.488194	3.76433
2013-08-19 09:00:00	1.21736	3.81702
2013-08-19 10:00:00	0.621181	4.32128
2013-08-19 11:00:00	0.802431	5.65389
2013-08-19 12:00:00	2.73299	6.23291
2013-08-19 13:00:00	0.850694	6.39203
2013-08-19 14:00:00	1.69931	8.56542
2013-08-19 15:00:00	2.12535	7.00682
2013-08-19 16:00:00	1.71771	7.57186
2013-08-19 17:00:00	1.44444	7.29935
2013-08-19 18:00:00	2.14757	7.90128
2013-08-19 19:00:00	2.68924	7.42694
2013-08-19 20:00:00	0.844792	5.85332
2013-08-19 21:00:00	1.67951	5.53781
2013-08-19 22:00:00	3.04514	5.04646
2013-08-19 23:00:00	1.83611	4.53365
2013-08-20	1.9566	4.29274
2013-08-20 01:00:00	1.61701	4.37433
2013-08-20 02:00:00	2.67882	3.98749
2013-08-20 03:00:00	1.87431	3.75622
2013-08-20 04:00:00	1.16354	3.63879
2013-08-20 05:00:00	0.263542	3.56194
2013-08-20 06:00:00	1.1625	3.37212
2013-08-20 07:00:00	1.64965	3.58216
2013-08-20 08:00:00	1.69931	3.42055
2013-08-20 09:00:00	4.14271	2.50064
2013-08-20 10:00:00	5.44861	2.18127
2013-08-20 11:00:00	6.55417	2.56463
2013-08-20 12:00:00	6.44306	2.65268
2013-08-20 13:00:00	6.74583	2.56063
2013-08-20 14:00:00	7.09097	2.67671
2013-08-20 15:00:00	7.29965	2.88922
2013-08-20 16:00:00	6.16215	3.49728
2013-08-20 17:00:00	5.99062	3.37615
2013-08-20 18:00:00	4.44896	3.44073
2013-08-20 19:00:00	2.53715	3.14243
2013-08-20 20:00:00	2.14271	2.86915
2013-08-20 21:00:00	2.17847	2.45267
2013-08-20 22:00:00	2.03507	1.9941
2013-08-20 23:00:00	1.92604	1.5771
2013-08-21	1.1066	1.42261
2013-08-21 01:00:00	0.751042	1.0629
2013-08-21 02:00:00	1.59653	1.00371
2013-08-21 03:00:00	1.87743	0.72392
2013-08-21 04:00:00	1.18264	0.28768
2013-08-21 05:00:00	1.73646	0.57442
2013-08-21 06:00:00	2.25417	0.63341
2013-08-21 07:00:00	2.54167	0.48401
2013-08-21 08:00:00	2.61146	0.76722
2013-08-21 09:00:00	3.04896	0.8263
2013-08-21 10:00:00	2.83125	0.76722
2013-08-21 11:00:00	2.82465	0.71211
2013-08-21 12:00:00	2.36354	1.06685
2013-08-21 13:00:00	2.36667	1.81917
2013-08-21 14:00:00	4.22431	1.8589
2013-08-21 15:00:00	4.93854	1.84698
2013-08-21 16:00:00	6.60035	1.97023
2013-08-21 17:00:00	6.79375	1.94636
2013-08-21 18:00:00	6.39687	2.10557
2013-08-21 19:00:00	4.46215	2.58463
2013-08-21 20:00:00	3.07049	2.20519
2013-08-21 21:00:00	5.04722	1.27622
2013-08-21 22:00:00	3.8191	1.09448
2013-08-21 23:00:00	3.89826	1.4622
2013-08-22	3.87222	1.09448
2013-08-22 01:00:00	1.94479	0.79873
2013-08-22 02:00:00	2.41111	0.28768
2013-08-22 03:00:00	4.93958	-0.20979
2013-08-22 04:00:00	3.01076	-0.66161
2013-08-22 05:00:00	1.92569	-1.02858
2013-08-22 06:00:00	4.12708	-0.41614
2013-08-22 07:00:00	4.68056	-0.57697
2013-08-22 08:00:00	4.47014	-0.55941
2013-08-22 09:00:00	5.60417	-0.46183
2013-08-22 10:00:00	5.74826	-0.13156
2013-08-22 11:00:00	5.79826	0.02111
2013-08-22 12:00:00	5.28333	0.26414
2013-08-22 13:00:00	5.30694	0.34262
2013-08-22 14:00:00	4.84792	0.62948
2013-08-22 15:00:00	4.325	0.92089
2013-08-22 16:00:00	5.30069	0.7751
2013-08-22 17:00:00	5.73993	0.81449
2013-08-22 18:00:00	5.15104	0.70817
2013-08-22 19:00:00	4.42188	0.57835
2013-08-22 20:00:00	3.02396	0.24845
2013-08-22 21:00:00	2.18785	-0.2958
2013-08-22 22:00:00	1.30104	-2.38896
2013-08-22 23:00:00	2.47535	-3.6934
2013-08-23	2.17396	-3.49062
2013-08-23 01:00:00	2.02847	-3.74659
2013-08-23 02:00:00	2.26389	-3.29084
2013-08-23 03:00:00	2.33333	-3.55116
2013-08-23 04:00:00	2.30764	-3.5554
2013-08-23 05:00:00	1.80625	-2.88867
2013-08-23 06:00:00	2.45312	-1.59478
2013-08-23 07:00:00	1.82465	0.02894
2013-08-23 08:00:00	1.65938	1.19322
2013-08-23 09:00:00	1.31736	1.07474
2013-08-23 10:00:00	1.26528	1.63658
2013-08-23 11:00:00	1.44132	2.45666
2013-08-23 12:00:00	1.95868	2.15736
2013-08-23 13:00:00	1.7375	3.96718
2013-08-23 14:00:00	2.60625	2.74482
2013-08-23 15:00:00	2.13715	2.28097
2013-08-23 16:00:00	2.79375	1.8748
2013-08-23 17:00:00	1.98576	1.80328
2013-08-23 18:00:00	1.58125	1.62865
2013-08-23 19:00:00	1.40208	2.17729
2013-08-23 20:00:00	3.33611	4.73838
2013-08-23 21:00:00	4.77674	6.64821
2013-08-23 22:00:00	5.62465	6.6398
2013-08-23 23:00:00	3.97014	7.01528
2013-08-24	2.89688	5.23189
2013-08-24 01:00:00	7.92465	6.78721
2013-08-24 02:00:00	7.45	6.94339
2013-08-24 03:00:00	6.0941	6.76192
2013-08-24 04:00:00	3.99306	7.0449
2013-08-24 05:00:00	2.34896	6.74085
2013-08-24 06:00:00	6.66042	6.36688
2013-08-24 07:00:00	5.54861	5.03
2013-08-24 08:00:00	4.4684	3.33178
2013-08-24 09:00:00	4.78785	3.09415
2013-08-24 10:00:00	3.96042	3.60238
2013-08-24 11:00:00	3.90069	4.35392
2013-08-24 12:00:00	3.34306	4.27235
2013-08-24 13:00:00	4.25972	4.62776
2013-08-24 14:00:00	4.12257	4.29681
2013-08-24 15:00:00	3.86389	3.93875
2013-08-24 16:00:00	3.43854	3.4892
2013-08-24 17:00:00	4.28333	3.40844
2013-08-24 18:00:00	4.19201	3.12231
2013-08-24 19:00:00	2.84618	2.45267
2013-08-24 20:00:00	2.13229	1.86685
2013-08-24 21:00:00	1.76771	0.91695
2013-08-24 22:00:00	1.69757	0.85783
2013-08-24 23:00:00	1.75035	0.66488
2013-08-25	2.30139	-0.44465
2013-08-25 01:00:00	2.43403	-1.06828
2013-08-25 02:00:00	1.53333	-1.36298
2013-08-25 03:00:00	1.48924	-1.16669
2013-08-25 04:00:00	0.752778	-1.18497
2013-08-25 05:00:00	1.86389	-1.40105
2013-08-25 06:00:00	1.07361	-0.91764
2013-08-25 07:00:00	0.72743	-0.73257
2013-08-25 08:00:00	1.7316	1.85095
2013-08-25 09:00:00	0.954514	3.74407
2013-08-25 10:00:00	1.18403	3.66308
2013-08-25 11:00:00	2.17014	2.45267
2013-08-25 12:00:00	1.87986	2.56463
2013-08-25 13:00:00	1.53993	3.23505
2013-08-25 14:00:00	1.43611	3.25116
2013-08-25 15:00:00	1.64965	4.02812
2013-08-25 16:00:00	1.97986	3.78054
2013-08-25 17:00:00	1.39722	3.99155
2013-08-25 18:00:00	1.67813	3.94687
2013-08-25 19:00:00	1.80903	3.47304
2013-08-25 20:00:00	1.42986	2.50064
2013-08-25 21:00:00	2.19896	0.02502
2013-08-25 22:00:00	1.47674	-1.12663
2013-08-25 23:00:00	1.56285	-1.92555
2013-08-26	1.12187	-2.25548
2013-08-26 01:00:00	2.22049	-2.24503
2013-08-26 02:00:00	1.89444	-2.68316
2013-08-26 03:00:00	1.88958	-2.96937
2013-08-26 04:00:00	1.61806	-3.26268
2013-08-26 05:00:00	1.84861	-2.98868
2013-08-26 06:00:00	0.544097	-0.82805
2013-08-26 07:00:00	0.317708	2.75284
2013-08-26 08:00:00	1.04514	1.84301
2013-08-26 09:00:00	0.582639	2.04982
2013-08-26 10:00:00	0.513542	2.46865
2013-08-26 11:00:00	0.738889	2.62866
2013-08-26 12:00:00	1.32049	2.57263
2013-08-26 13:00:00	1.33611	2.64067
2013-08-26 14:00:00	1.46493	2.88521
2013-08-26 15:00:00	0.985417	3.32775
2013-08-26 16:00:00	1.62951	3.17061
2013-08-26 17:00:00	1.44444	2.80496
2013-08-26 18:00:00	1.47708	2.7328
2013-08-26 19:00:00	1.05174	2.45666
2013-08-26 20:00:00	0.730903	2.07371
2013-08-26 21:00:00	0.834722	1.26436
2013-08-26 22:00:00	0.520833	0.9761
2013-08-26 23:00:00	0.582986	0.71604
2013-08-27	1.0809	-0.13939
2013-08-27 01:00:00	1.42604	-0.31925
2013-08-27 02:00:00	1.00937	-0.0298
2013-08-27 03:00:00	1.17083	-0.2958
2013-08-27 04:00:00	0.929514	-0.23717
2013-08-27 05:00:00	0.713542	-0.112
2013-08-27 06:00:00	0.475694	0.17001
2013-08-27 07:00:00	0.276736	1.15766
2013-08-27 08:00:00	0.351042	2.26501
2013-08-27 09:00:00	0.610417	3.33582
2013-08-27 10:00:00	0.642361	3.76433
2013-08-27 11:00:00	1.40278	3.50536
2013-08-27 12:00:00	1.40868	3.29953
2013-08-27 13:00:00	1.87569	3.52556
2013-08-27 14:00:00	2.10347	3.1022
2013-08-27 15:00:00	1.9184	2.82903
2013-08-27 16:00:00	2.54062	2.55663
2013-08-27 17:00:00	3.30035	2.56463
2013-08-27 18:00:00	2.63681	2.50863
2013-08-27 19:00:00	2.45799	2.6687
2013-08-27 20:00:00	4.27396	2.41271
2013-08-27 21:00:00	3.55417	2.4247
2013-08-27 22:00:00	4.39896	2.10955
2013-08-27 23:00:00	2.78333	1.86685
2013-08-28	2.25451	1.28808
2013-08-28 01:00:00	2.77292	1.29204
2013-08-28 02:00:00	1.44965	1.09843
2013-08-28 03:00:00	1.3184	0.91695
2013-08-28 04:00:00	1.11667	0.71604
2013-08-28 05:00:00	2.60417	0.96426
2013-08-28 06:00:00	2.47743	0.9761
2013-08-28 07:00:00	1.19931	0.93272
2013-08-28 08:00:00	1.32535	1.06685
2013-08-28 09:00:00	2.15347	1.32368
2013-08-28 10:00:00	3.39167	1.28018
2013-08-28 11:00:00	3.41076	1.3039
2013-08-28 12:00:00	3.54514	1.3395
2013-08-28 13:00:00	2.86597	1.51369
2013-08-28 14:00:00	2.88368	1.42657
2013-08-28 15:00:00	2.87986	1.34346
2013-08-28 16:00:00	3.30556	1.21693
2013-08-28 17:00:00	3.21736	1.02344
2013-08-28 18:00:00	3.61354	0.83812
2013-08-28 19:00:00	3.53264	0.57835
2013-08-28 20:00:00	3.70104	0.46044
2013-08-28 21:00:00	3.68576	0.3701
2013-08-28 22:00:00	3.38437	0.29553
2013-08-28 23:00:00	3.46215	0.26414
2013-08-29	3.47882	0.27983
2013-08-29 01:00:00	3.43854	0.44865
2013-08-29 02:00:00	3.49514	0.40544
2013-08-29 03:00:00	2.07153	0.32692
2013-08-29 04:00:00	1.83785	0.12297
2013-08-29 05:00:00	1.50764	0.00544
2013-08-29 06:00:00	1.98403	-0.04154
2013-08-29 07:00:00	2.11319	0.03286
2013-08-29 08:00:00	2.24028	0.17786
2013-08-29 09:00:00	2.37083	0.54296
2013-08-29 10:00:00	3.25521	0.94455
2013-08-29 11:00:00	3.24931	1.06685
2013-08-29 12:00:00	4.05278	1.00371
2013-08-29 13:00:00	4.48438	0.88147
2013-08-29 14:00:00	4.63333	1.09448
2013-08-29 15:00:00	5.23264	1.07474
2013-08-29 16:00:00	5.58472	0.96426
2013-08-29 17:00:00	5.55729	1.16161
2013-08-29 18:00:00	5.63299	0.79085
2013-08-29 19:00:00	4.86389	0.52331
2013-08-29 20:00:00	4.47326	0.16609
2013-08-29 21:00:00	4.04861	-0.05329
2013-08-29 22:00:00	3.08611	-0.20588
2013-08-29 23:00:00	2.44583	-0.77818
2013-08-30	2.26979	-0.662
2013-08-30 01:00:00	2.05417	-0.74855
2013-08-30 02:00:00	1.68333	-0.72166
2013-08-30 03:00:00	0.543403	-1.25961
2013-08-30 04:00:00	0.344097	-1.3991
2013-08-30 05:00:00	0.618403	-1.17641
2013-08-30 06:00:00	1.24306	-0.89077
2013-08-30 07:00:00	0.702083	-0.47315
2013-08-30 08:00:00	0.666667	1.24064
2013-08-30 09:00:00	0.945139	0.67669
2013-08-30 10:00:00	0.963889	0.70817
2013-08-30 11:00:00	0.84375	1.11817
2013-08-30 12:00:00	1.24931	1.07079
2013-08-30 13:00:00	2.08785	1.49785
2013-08-30 14:00:00	3.60312	2.13744
2013-08-30 15:00:00	4.2691	2.24108
2013-08-30 16:00:00	4.47604	2.16932
2013-08-30 17:00:00	3.92396	2.3089
2013-08-30 18:00:00	3.87153	2.0538
2013-08-30 19:00:00	3.4434	1.97023
2013-08-30 20:00:00	3.60938	1.63658
2013-08-30 21:00:00	3.85451	1.54936
2013-08-30 22:00:00	2.66944	1.37115
2013-08-30 23:00:00	3.13819	1.29204
2013-08-31	2.7059	1.29204
2013-08-31 01:00:00	3.74722	1.14976
2013-08-31 02:00:00	3.48021	1.18532
2013-08-31 03:00:00	3.90903	1.07079
2013-08-31 04:00:00	3.25208	1.00371
2013-08-31 05:00:00	2.84826	0.81843
2013-08-31 06:00:00	1.06632	0.93272
2013-08-31 07:00:00	2.55868	1.81122
2013-08-31 08:00:00	2.49306	1.71593
2013-08-31 09:00:00	4.23403	1.28018
2013-08-31 10:00:00	4.225	2.01798
2013-08-31 11:00:00	4.93299	1.9225
2013-08-31 12:00:00	5.37118	1.75959
2013-08-31 13:00:00	5.1816	1.75165
2013-08-31 14:00:00	5.48889	1.74768
2013-08-31 15:00:00	5.29375	1.63261
2013-08-31 16:00:00	5.48507	1.41073
2013-08-31 17:00:00	4.86701	1.23669
2013-08-31 18:00:00	4.40521	1.05106
2013-08-31 19:00:00	3.68403	0.71211
2013-08-31 20:00:00	2.73715	0.57835
2013-08-31 21:00:00	3.02708	-0.20979
2013-08-31 22:00:00	0.972222	-0.87519
2013-08-31 23:00:00	2.15313	-1.68014
2013-09-01	1.65938	-1.19974
2013-09-01 01:00:00	1.24063	-1.06983
2013-09-01 02:00:00	1.02674	-0.81286
2013-09-01 03:00:00	1.81458	-1.08073
2013-09-01 04:00:00	1.19132	-0.82727
2013-09-01 05:00:00	0.838194	-0.84441
2013-09-01 06:00:00	1.18924	-0.61481
2013-09-01 07:00:00	0.947917	0.02111
2013-09-01 08:00:00	1.13611	0.38974
2013-09-01 09:00:00	1.29306	0.8933
2013-09-01 10:00:00	1.69861	1.4424
2013-09-01 11:00:00	1.82847	1.93046
2013-09-01 12:00:00	1.28056	2.36479
2013-09-01 13:00:00	0.603472	2.83705
2013-09-01 14:00:00	0.731944	2.86514
2013-09-01 15:00:00	1.31354	2.92937
2013-09-01 16:00:00	2.14688	2.26501
2013-09-01 17:00:00	1.86389	1.99808
2013-09-01 18:00:00	1.43993	1.10632
2013-09-01 19:00:00	0.992708	0.44865
2013-09-01 20:00:00	1.52396	0.35048
2013-09-01 21:00:00	2.33021	0.57442
2013-09-01 22:00:00	1.28021	0.74754
2013-09-01 23:00:00	1.3191	1.23274
2013-09-02	0.770486	1.56521
2013-09-02 01:00:00	1.03125	0.81843
2013-09-02 02:00:00	3.52778	0.56655
2013-09-02 03:00:00	2.40104	0.20923
2013-09-02 04:00:00	2.03056	0.32692
2013-09-02 05:00:00	2.65104	0.48794
2013-09-02 06:00:00	2.58299	0.60194
2013-09-02 07:00:00	0.788194	0.52724
2013-09-02 08:00:00	1.14688	0.48008
2013-09-02 09:00:00	1.16181	0.19354
2013-09-02 10:00:00	1.03021	0.89724
2013-09-02 11:00:00	2.77292	2.81298
2013-09-02 12:00:00	4.38993	3.25519
2013-09-02 13:00:00	3.53229	2.96953
2013-09-02 14:00:00	3.28785	2.91331
2013-09-02 15:00:00	4.76667	3.23907
2013-09-02 16:00:00	4.02292	2.4247
2013-09-02 17:00:00	2.72431	1.47408
2013-09-02 18:00:00	4.35382	1.68021
2013-09-02 19:00:00	4.92014	2.70475
2013-09-02 20:00:00	5.24271	2.92134
2013-09-02 21:00:00	5.12118	1.10632
2013-09-02 22:00:00	2.65139	0.84994
2013-09-02 23:00:00	2.68958	0.33085
2013-09-03	2.13264	0.57442
2013-09-03 01:00:00	1.47326	0.43294
2013-09-03 02:00:00	2.33438	0.08771
2013-09-03 03:00:00	1.43611	-0.29971
2013-09-03 04:00:00	2.2809	-0.44113
2013-09-03 05:00:00	3.13993	-0.58165
2013-09-03 06:00:00	4.75417	-0.24498
2013-09-03 07:00:00	4.84861	-0.37786
2013-09-03 08:00:00	5.69028	0.21707
2013-09-03 09:00:00	5.62604	0.97215
2013-09-03 10:00:00	5.95451	1.29204
2013-09-03 11:00:00	6.20694	1.2446
2013-09-03 12:00:00	5.98472	1.31577
2013-09-03 13:00:00	5.94167	1.80328
2013-09-03 14:00:00	6.50104	2.10159
2013-09-03 15:00:00	6.17604	2.17729
2013-09-03 16:00:00	5.51736	2.68072
2013-09-03 17:00:00	5.93785	2.27299
2013-09-03 18:00:00	6.1868	1.74371
2013-09-03 19:00:00	6.53125	1.35928
2013-09-03 20:00:00	5.52951	1.25645
2013-09-03 21:00:00	5.23993	1.27227
2013-09-03 22:00:00	4.80972	1.09843
2013-09-03 23:00:00	4.75451	0.79479
2013-09-04	4.24097	0.68456
2013-09-04 01:00:00	1.67535	0.68456
2013-09-04 02:00:00	0.869444	0.60981
2013-09-04 03:00:00	0.504514	0.35833
2013-09-04 04:00:00	0.572917	0.04853
2013-09-04 05:00:00	1.12986	-0.03371
2013-09-04 06:00:00	1.21632	0.16609
2013-09-04 07:00:00	0.38368	0.28768
2013-09-04 08:00:00	0.511458	1.35533
2013-09-04 09:00:00	3.57708	1.55728
2013-09-04 10:00:00	3.92639	2.01798
2013-09-04 11:00:00	2.2184	1.62468
2013-09-04 12:00:00	2.05208	2.08964
2013-09-04 13:00:00	2.38889	2.31289
2013-09-04 14:00:00	1.00799	2.47265
2013-09-04 15:00:00	1.06424	2.18526
2013-09-04 16:00:00	0.378472	2.3568
2013-09-04 17:00:00	0.509722	2.23709
2013-09-04 18:00:00	1.1566	1.98216
2013-09-04 19:00:00	2.64792	1.41073
2013-09-04 20:00:00	0.978819	0.97215
2013-09-04 21:00:00	0.501736	0.84994
2013-09-04 22:00:00	1.14132	0.55083
2013-09-04 23:00:00	1.40104	0.75935
2013-09-05	1.00903	-0.24889
2013-09-05 01:00:00	1.87292	-1.29459
2013-09-05 02:00:00	2.96007	-0.52663
2013-09-05 03:00:00	1.74201	-0.56175
2013-09-05 04:00:00	1.94896	-0.68306
2013-09-05 05:00:00	2.26736	-1.05582
2013-09-05 06:00:00	2.04861	-1.5812
2013-09-05 07:00:00	2.56146	-0.37395
2013-09-05 08:00:00	1.94375	1.07079
2013-09-05 09:00:00	0.909028	1.05106
2013-09-05 10:00:00	1.73056	1.62865
2013-09-05 11:00:00	0.851389	3.65094
2013-09-05 12:00:00	1.68681	2.83304
2013-09-05 13:00:00	2.55417	2.59264
2013-09-05 14:00:00	2.8316	2.57263
2013-09-05 15:00:00	3.87639	2.04584
2013-09-05 16:00:00	5.39826	1.95432
2013-09-05 17:00:00	5.14375	2.27299
2013-09-05 18:00:00	4.36111	1.43844
2013-09-05 19:00:00	3.12222	0.78692
2013-09-05 20:00:00	2.75486	0.09946
2013-09-05 21:00:00	1.69861	-0.46612
2013-09-05 22:00:00	1.77535	-1.01224
2013-09-05 23:00:00	1.50764	-2.03635
2013-09-06	1.68021	-2.54286
2013-09-06 01:00:00	1.43333	-3.18667
2013-09-06 02:00:00	1.26285	-3.41697
2013-09-06 03:00:00	0.935069	-3.93656
2013-09-06 04:00:00	1.46424	-3.43085
2013-09-06 05:00:00	0.778472	-2.58616
2013-09-06 06:00:00	1.60799	-1.99026
2013-09-06 07:00:00	2.89236	-1.83292
2013-09-06 08:00:00	2.25694	-1.51715
2013-09-06 09:00:00	2.3809	-1.23434
2013-09-06 10:00:00	2.85174	-0.78207
2013-09-06 11:00:00	3.1059	-0.57346
2013-09-06 12:00:00	4.41146	-0.31534
2013-09-06 13:00:00	6.21944	-0.26453
2013-09-06 14:00:00	5.83681	-0.54224
2013-09-06 15:00:00	6.01667	-0.57697
2013-09-06 16:00:00	5.9566	-0.39895
2013-09-06 17:00:00	3.75208	-0.45636
2013-09-06 18:00:00	3.8066	-0.80779
2013-09-06 19:00:00	4.21875	-0.79181
2013-09-06 20:00:00	4.20486	-0.90245
2013-09-06 21:00:00	5.68611	-1.2219
2013-09-06 22:00:00	5.36944	-1.45386
2013-09-06 23:00:00	5.42083	-1.58741
2013-09-07	5.83194	-1.78873
2013-09-07 01:00:00	5.36667	-1.76701
2013-09-07 02:00:00	4.64479	-1.75887
2013-09-07 03:00:00	3.81458	-1.78446
2013-09-07 04:00:00	2.99618	-1.96198
2013-09-07 05:00:00	3.14688	-1.96159
2013-09-07 06:00:00	2.85278	-2.0011
2013-09-07 07:00:00	3.30833	-1.88758
2013-09-07 08:00:00	3.11493	-1.66578
2013-09-07 09:00:00	2.40347	-1.33189
2013-09-07 10:00:00	3.07847	-1.07878
2013-09-07 11:00:00	3.26076	-0.78948
2013-09-07 12:00:00	3.65521	-0.82844
2013-09-07 13:00:00	3.34687	-0.75596
2013-09-07 14:00:00	3.25347	-0.86389
2013-09-07 15:00:00	3.31771	-1.02508
2013-09-07 16:00:00	3.21146	-0.9811
2013-09-07 17:00:00	2.88229	-1.2495
2013-09-07 18:00:00	2.35694	-1.43367
2013-09-07 19:00:00	2.37917	-1.70419
2013-09-07 20:00:00	1.49306	-2.36536
2013-09-07 21:00:00	0.869792	-3.26577
2013-09-07 22:00:00	1.05868	-3.36799
2013-09-07 23:00:00	0.8875	-3.20519
2013-09-08	1.10104	-3.3271
2013-09-08 01:00:00	1.50729	-5.40131
2013-09-08 02:00:00	1.88611	-5.78061
2013-09-08 03:00:00	0.720486	-5.90039
2013-09-08 04:00:00	1.29896	-5.8249
2013-09-08 05:00:00	1.44618	-6.86686
2013-09-08 06:00:00	1.96597	-6.74455
2013-09-08 07:00:00	1.59931	-4.54624
2013-09-08 08:00:00	0.894444	-2.92343
2013-09-08 09:00:00	0.949306	-2.62674
2013-09-08 10:00:00	0.559722	-1.61379
2013-09-08 11:00:00	0.660764	-0.31534
2013-09-08 12:00:00	0.709722	0.18178
2013-09-08 13:00:00	3.00035	0.27983
2013-09-08 14:00:00	2.02222	1.45032
2013-09-08 15:00:00	2.17743	2.92937
2013-09-08 16:00:00	2.75868	2.36878
2013-09-08 17:00:00	5.20937	1.73974
2013-09-08 18:00:00	5.43889	0.91695
2013-09-08 19:00:00	4.35382	0.38974
2013-09-08 20:00:00	4.28542	-0.0572
2013-09-08 21:00:00	1.16979	-0.20588
2013-09-08 22:00:00	0.913542	-0.28799
2013-09-08 23:00:00	1.62153	-0.41536
2013-09-09	2.41667	-0.01805
2013-09-09 01:00:00	2.71424	-0.0846
2013-09-09 02:00:00	2.06424	-0.27235
2013-09-09 03:00:00	2.09479	-0.44972
2013-09-09 04:00:00	2.62743	-0.31144
2013-09-09 05:00:00	2.04236	-0.22543
2013-09-09 06:00:00	1.67674	-0.32316
2013-09-09 07:00:00	1.79271	0.53117
2013-09-09 08:00:00	2.4309	1.03133
2013-09-09 09:00:00	3.28889	1.51766
2013-09-09 10:00:00	4.53229	3.13036
2013-09-09 11:00:00	3.11944	3.85352
2013-09-09 12:00:00	3.99236	1.99012
2013-09-09 13:00:00	2.54514	3.98749
2013-09-09 14:00:00	3.7309	3.31565
2013-09-09 15:00:00	2.80799	3.89815
2013-09-09 16:00:00	3.31458	3.5579
2013-09-09 17:00:00	4.86632	3.17866
2013-09-09 18:00:00	4.58194	2.47265
2013-09-09 19:00:00	2.29132	1.31972
2013-09-09 20:00:00	1.38958	0.46829
2013-09-09 21:00:00	1.42014	-0.01805
2013-09-09 22:00:00	1.13889	-0.01414
2013-09-09 23:00:00	1.41319	-0.39114
2013-09-10	1.13854	-0.747
2013-09-10 01:00:00	1.51667	-0.74778
2013-09-10 02:00:00	2.85139	-0.67877
2013-09-10 03:00:00	1.67917	-1.61263
2013-09-10 04:00:00	2.00174	-1.99646
2013-09-10 05:00:00	1.65799	-1.58197
2013-09-10 06:00:00	1.58958	-2.83074
2013-09-10 07:00:00	1.88333	-2.31701
2013-09-10 08:00:00	1.93993	0.04853
2013-09-10 09:00:00	2.92188	1.05895
2013-09-10 10:00:00	4.17222	1.33159
2013-09-10 11:00:00	4.34201	2.28097
2013-09-10 12:00:00	4.7934	2.04186
2013-09-10 13:00:00	6.1875	1.34346
2013-09-10 14:00:00	5.375	1.15766
2013-09-10 15:00:00	4.87917	0.95243
2013-09-10 16:00:00	5.23368	0.44079
2013-09-10 17:00:00	5.0743	0.06028
2013-09-10 18:00:00	4.88889	-0.57697
2013-09-10 19:00:00	4.14826	-1.43367
2013-09-10 20:00:00	4.32951	-1.87944
2013-09-10 21:00:00	3.41597	-1.88874
2013-09-10 22:00:00	4.00972	-2.08438
2013-09-10 23:00:00	3.49167	-2.24426
2013-09-11	3.32049	-2.33635
2013-09-11 01:00:00	4.8566	-2.41951
2013-09-11 02:00:00	2.91354	-2.29689
2013-09-11 03:00:00	4.87396	-2.09406
2013-09-11 04:00:00	4.52535	-2.48603
2013-09-11 05:00:00	4.55139	-2.56722
2013-09-11 06:00:00	3.6125	-2.26516
2013-09-11 07:00:00	3.29618	-2.24774
2013-09-11 08:00:00	2.8566	-2.15601
2013-09-11 09:00:00	1.86458	-2.14633
2013-09-11 10:00:00	2.35764	-2.04836
2013-09-11 11:00:00	2.53646	-1.6654
2013-09-11 12:00:00	2.92708	-1.33811
2013-09-11 13:00:00	2.63542	-1.26078
2013-09-11 14:00:00	2.91111	-0.83234
2013-09-11 15:00:00	3.37882	-0.52507
2013-09-11 16:00:00	3.51076	-0.54458
2013-09-11 17:00:00	3.96736	-0.72439
2013-09-11 18:00:00	3.11632	-0.86934
2013-09-11 19:00:00	3.49201	-0.97137
2013-09-11 20:00:00	3.94097	-1.28526
2013-09-11 21:00:00	4.57917	-1.67936
2013-09-11 22:00:00	2.76979	-2.34989
2013-09-11 23:00:00	1.0441	-4.0167
2013-09-12	1.12292	-5.03557
2013-09-12 01:00:00	1.44514	-3.48599
2013-09-12 02:00:00	1.01458	-2.92111
2013-09-12 03:00:00	3.22778	-1.09901
2013-09-12 04:00:00	3.72292	-1.14063
2013-09-12 05:00:00	3.71979	-1.13519
2013-09-12 06:00:00	4.22049	-1.08384
2013-09-12 07:00:00	3.90903	-1.08539
2013-09-12 08:00:00	4.39306	-1.08812
2013-09-12 09:00:00	4.08715	-1.19546
2013-09-12 10:00:00	4.62847	-1.06244
2013-09-12 11:00:00	4.81528	-0.68345
2013-09-12 12:00:00	4.0809	-0.46105
2013-09-12 13:00:00	4.56979	-0.54419
2013-09-12 14:00:00	5.4184	-0.77428
2013-09-12 15:00:00	4.89549	-0.78753
2013-09-12 16:00:00	4.74514	-0.90829
2013-09-12 17:00:00	4.65937	-0.92932
2013-09-12 18:00:00	4.40104	-0.99667
2013-09-12 19:00:00	4.17118	-1.18497
2013-09-12 20:00:00	3.59201	-1.46668
2013-09-12 21:00:00	2.37569	-1.66035
2013-09-12 22:00:00	2.37396	-1.76081
2013-09-12 23:00:00	1.31389	-1.94919
2013-09-13	1.46771	-1.86393
2013-09-13 01:00:00	1.12292	-2.05301
2013-09-13 02:00:00	0.465278	-2.76701
2013-09-13 03:00:00	0.968403	-3.06935
2013-09-13 04:00:00	0.697917	-3.36606
2013-09-13 05:00:00	0.875347	-3.41157
2013-09-13 06:00:00	1.07951	-3.1751
2013-09-13 07:00:00	0.584722	-2.91184
2013-09-13 08:00:00	0.868055	-2.32203
2013-09-13 09:00:00	0.750347	-1.93292
2013-09-13 10:00:00	0.580556	-1.4628
2013-09-13 11:00:00	1.13576	-1.18691
2013-09-13 12:00:00	1.07222	-0.63704
2013-09-13 13:00:00	1.70035	-0.26844
2013-09-13 14:00:00	1.39167	-0.30362
2013-09-13 15:00:00	2.89028	-0.38216
2013-09-13 16:00:00	3.57396	-0.57814
2013-09-13 17:00:00	3.44167	-0.6971
2013-09-13 18:00:00	3.21111	-0.64796
2013-09-13 19:00:00	3.08333	-1.18652
2013-09-13 20:00:00	2.79062	-1.52919
2013-09-13 21:00:00	2.79444	-1.63242
2013-09-13 22:00:00	1.51597	-2.18388
2013-09-13 23:00:00	0.695139	-2.37271
2013-09-14	1.80208	-2.61863
2013-09-14 01:00:00	1.93125	-2.68239
2013-09-14 02:00:00	1.08194	-3.24069
2013-09-14 03:00:00	0.558681	-3.62595
2013-09-14 04:00:00	1.09757	-2.97671
2013-09-14 05:00:00	1.31285	-3.17703
2013-09-14 06:00:00	1.11528	-3.39961
2013-09-14 07:00:00	1.26805	-2.93231
2013-09-14 08:00:00	0.774305	-2.43847
2013-09-14 09:00:00	1.2559	-0.56136
2013-09-14 10:00:00	1.78507	-0.98616
2013-09-14 11:00:00	0.464583	-0.27626
2013-09-14 12:00:00	1.0559	-0.19024
2013-09-14 13:00:00	3.35278	0.5351
2013-09-14 14:00:00	4.15833	0.57835
2013-09-14 15:00:00	2.90451	1.03133
2013-09-14 16:00:00	4.01285	1.21693
2013-09-14 17:00:00	4.10139	0.73179
2013-09-14 18:00:00	6.38438	-0.35442
2013-09-14 19:00:00	6.25903	-0.63431
2013-09-14 20:00:00	4.76042	-0.90479
2013-09-14 21:00:00	2.58055	-1.09823
2013-09-14 22:00:00	1.77049	-1.11379
2013-09-14 23:00:00	0.742361	-1.38784
2013-09-15	1.35833	-1.53928
2013-09-15 01:00:00	1.25451	-1.97631
2013-09-15 02:00:00	1.84792	-2.63215
2013-09-15 03:00:00	1.16042	-2.67891
2013-09-15 04:00:00	1.48993	-2.58693
2013-09-15 05:00:00	1.1941	-2.12813
2013-09-15 06:00:00	1.75278	-1.66229
2013-09-15 07:00:00	2.16319	-0.86
2013-09-15 08:00:00	1.91354	-0.72712
2013-09-15 09:00:00	1.42361	-0.29971
2013-09-15 10:00:00	1.07569	1.06685
2013-09-15 11:00:00	2.40382	1.10238
2013-09-15 12:00:00	2.85938	0.90512
2013-09-15 13:00:00	4.77674	0.65701
2013-09-15 14:00:00	5.37188	0.41723
2013-09-15 15:00:00	5.17257	0.34655
2013-09-15 16:00:00	3.76493	0.10338
2013-09-15 17:00:00	2.84549	-0.09634
2013-09-15 18:00:00	1.02569	-0.28017
2013-09-15 19:00:00	1.12743	-0.75791
2013-09-15 20:00:00	1.74063	-1.02975
2013-09-15 21:00:00	0.933681	-0.68969
2013-09-15 22:00:00	1.4059	-0.95307
2013-09-15 23:00:00	1.51111	1.15371
2013-09-16	1.25035	0.62554
2013-09-16 01:00:00	3.95035	0.18178
2013-09-16 02:00:00	4.17361	0.36225
2013-09-16 03:00:00	3.61632	0.25629
2013-09-16 04:00:00	1.71285	0.21315
2013-09-16 05:00:00	2.49132	0.11514
2013-09-16 06:00:00	1.72812	0.45651
2013-09-16 07:00:00	3.20382	0.14649
2013-09-16 08:00:00	3.85625	0.75541
2013-09-16 09:00:00	2.74028	1.56125
2013-09-16 10:00:00	1.61285	2.37277
2013-09-16 11:00:00	0.999305	3.05393
2013-09-16 12:00:00	3.84861	4.56228
2013-09-16 13:00:00	6.15243	4.10945
2013-09-16 14:00:00	5.10833	3.23102
2013-09-16 15:00:00	4.48403	1.08264
2013-09-16 16:00:00	5.1625	0.28376
2013-09-16 17:00:00	5.00347	-0.04546
2013-09-16 18:00:00	4.56701	-0.40559
2013-09-16 19:00:00	4.97396	-0.64211
2013-09-16 20:00:00	4.05278	-0.82493
2013-09-16 21:00:00	2.08438	-1.18885
2013-09-16 22:00:00	2.74896	-1.56606
2013-09-16 23:00:00	2.40278	-1.56761
2013-09-17	3.70625	-1.41736
2013-09-17 01:00:00	4.00833	-1.50473
2013-09-17 02:00:00	2.92569	-1.71505
2013-09-17 03:00:00	1.90174	-2.25703
2013-09-17 04:00:00	1.32222	-2.4868
2013-09-17 05:00:00	1.03542	-2.80448
2013-09-17 06:00:00	2.08611	-3.22641
2013-09-17 07:00:00	1.71007	-3.39537
2013-09-17 08:00:00	2.29861	-1.65259
2013-09-17 09:00:00	3.60556	-0.26844
2013-09-17 10:00:00	4.40903	0.60981
2013-09-17 11:00:00	4.50417	0.92089
2013-09-17 12:00:00	5.15694	1.83903
2013-09-17 13:00:00	3.44062	2.02594
2013-09-17 14:00:00	5.57361	1.63261
2013-09-17 15:00:00	5.26667	1.46616
2013-09-17 16:00:00	4.57812	0.71998
2013-09-17 17:00:00	5.23819	0.58621
2013-09-17 18:00:00	5.03125	0.50366
2013-09-17 19:00:00	2.63958	0.04461
2013-09-17 20:00:00	3.85417	-0.15112
2013-09-17 21:00:00	5.19792	-0.3427
2013-09-17 22:00:00	3.37431	-0.38528
2013-09-17 23:00:00	1.75972	-0.63392
2013-09-18	2.60764	-0.5559
2013-09-18 01:00:00	1.72569	-1.13946
2013-09-18 02:00:00	1.56944	-1.50745
2013-09-18 03:00:00	1.80451	-1.03987
2013-09-18 04:00:00	2.1743	-2.53436
2013-09-18 05:00:00	6.08229	-1.93292
2013-09-18 06:00:00	6.12847	-1.62699
2013-09-18 07:00:00	5.05729	-2.02551
2013-09-18 08:00:00	1.46667	-2.97478
2013-09-18 09:00:00	2.44271	-1.23395
2013-09-18 10:00:00	4.00521	-0.73335
2013-09-18 11:00:00	5.21736	-0.95424
2013-09-18 12:00:00	5.91424	-1.14452
2013-09-18 13:00:00	6.72014	-1.34161
2013-09-18 14:00:00	7.63715	-1.6588
2013-09-18 15:00:00	6.98125	-1.63785
2013-09-18 16:00:00	6.17222	-1.96469
2013-09-18 17:00:00	4.31944	-2.01544
2013-09-18 18:00:00	4.83056	-2.12619
2013-09-18 19:00:00	4.47118	-2.30811
2013-09-18 20:00:00	3.51319	-2.54054
2013-09-18 21:00:00	4.26319	-2.47366
2013-09-18 22:00:00	5.8875	-2.9242
2013-09-18 23:00:00	5.68715	-3.31669
2013-09-19	5.31424	-3.36876
2013-09-19 01:00:00	5.28854	-3.5473
2013-09-19 02:00:00	5.98125	-3.56156
2013-09-19 03:00:00	5.82326	-3.31244
2013-09-19 04:00:00	5.39236	-3.47173
2013-09-19 05:00:00	3.94896	-3.26499
2013-09-19 06:00:00	4.07361	-3.14693
2013-09-19 07:00:00	5.39757	-3.08325
2013-09-19 08:00:00	5.67361	-3.00528
2013-09-19 09:00:00	6.40764	-2.74653
2013-09-19 10:00:00	7.39236	-1.87711
2013-09-19 11:00:00	8.04618	-1.47406
2013-09-19 12:00:00	5.84375	-1.11535
2013-09-19 13:00:00	4.83264	-1.55985
2013-09-19 14:00:00	5.00278	-1.78756
2013-09-19 15:00:00	5.46319	-2.03906
2013-09-19 16:00:00	6.17222	-2.0987
2013-09-19 17:00:00	6.83785	-2.47598
2013-09-19 18:00:00	5.8875	-2.95431
2013-09-19 19:00:00	5.41076	-3.28853
2013-09-19 20:00:00	5.76979	-3.36182
2013-09-19 21:00:00	4.71528	-3.49178
2013-09-19 22:00:00	2.71597	-3.49409
2013-09-19 23:00:00	3.32708	-3.23027
2013-09-20	2.06979	-2.97169
2013-09-20 01:00:00	3.36007	-2.4926
2013-09-20 02:00:00	4.28021	-2.28373
2013-09-20 03:00:00	5.10555	-2.38432
2013-09-20 04:00:00	4.7434	-2.8852
2013-09-20 05:00:00	4.68056	-2.94003
2013-09-20 06:00:00	5.13368	-3.52725
2013-09-20 07:00:00	2.6625	-3.60243
2013-09-20 08:00:00	1.17917	-2.64336
2013-09-20 09:00:00	1.9809	-2.67737
2013-09-20 10:00:00	2.32292	-1.19507
2013-09-20 11:00:00	4.47778	-1.1943
2013-09-20 12:00:00	2.92813	-0.56292
2013-09-20 13:00:00	4.00035	-0.50243
2013-09-20 14:00:00	3.53681	-0.45909
2013-09-20 15:00:00	3.08472	-0.86155
2013-09-20 16:00:00	2.43785	-1.02469
2013-09-20 17:00:00	2.04549	-1.39017
2013-09-20 18:00:00	1.80903	-2.27986
2013-09-20 19:00:00	2.27604	-4.82884
2013-09-20 20:00:00	3.37917	-6.01172
2013-09-20 21:00:00	2.91181	-6.64618
2013-09-20 22:00:00	2.78993	-6.43911
2013-09-20 23:00:00	1.99722	-7.11238
2013-09-21	2.15382	-7.08226
2013-09-21 01:00:00	1.94792	-7.35577
2013-09-21 02:00:00	2.24861	-7.53398
2013-09-21 03:00:00	3.11736	-7.67981
2013-09-21 04:00:00	2.83125	-7.43384
2013-09-21 05:00:00	2.21806	-7.80636
2013-09-21 06:00:00	1.86319	-7.82495
2013-09-21 07:00:00	2.44757	-7.17804
2013-09-21 08:00:00	1.85868	-6.38398
2013-09-21 09:00:00	0.64375	-5.00516
2013-09-21 10:00:00	0.519792	-2.8458
2013-09-21 11:00:00	0.567361	-1.83021
2013-09-21 12:00:00	1.61076	-2.20672
2013-09-21 13:00:00	1.70312	-1.87401
2013-09-21 14:00:00	1.74931	-1.75693
2013-09-21 15:00:00	0.852778	-1.92362
2013-09-21 16:00:00	1.51458	-2.02473
2013-09-21 17:00:00	1.30868	-1.90502
2013-09-21 18:00:00	1.42639	-3.76971
2013-09-21 19:00:00	2.35451	-6.17046
2013-09-21 20:00:00	3.05	-6.8221
2013-09-21 21:00:00	3.26111	-7.36813
2013-09-21 22:00:00	2.55729	-7.43268
2013-09-21 23:00:00	2.90972	-7.49222
2013-09-22	2.69167	-7.77888
2013-09-22 01:00:00	2.50104	-7.74095
2013-09-22 02:00:00	2.4059	-7.89735
2013-09-22 03:00:00	2.16319	-7.99999
2013-09-22 04:00:00	2.47778	-8.10733
2013-09-22 05:00:00	2.99097	-8.20115
2013-09-22 06:00:00	2.33229	-8.52595
2013-09-22 07:00:00	1.53542	-7.88535
2013-09-22 08:00:00	1.26979	-6.80358
2013-09-22 09:00:00	1.51562	-5.99246
2013-09-22 10:00:00	1.78785	-4.72797
2013-09-22 11:00:00	2.00694	-4.39761
2013-09-22 12:00:00	2.09097	-4.23086
2013-09-22 13:00:00	3.6625	-4.60361
2013-09-22 14:00:00	3.70382	-4.7734
2013-09-22 15:00:00	2.76805	-4.54432
2013-09-22 16:00:00	2.03889	-4.23125
2013-09-22 17:00:00	2.00243	-3.98588
2013-09-22 18:00:00	1.79514	-3.90227
2013-09-22 19:00:00	1.5191	-4.01169
2013-09-22 20:00:00	2.33576	-4.60053
2013-09-22 21:00:00	2.94201	-5.02595
2013-09-22 22:00:00	2.50625	-4.94125
2013-09-22 23:00:00	1.75556	-4.79804
2013-09-23	1.73472	-4.30172
2013-09-23 01:00:00	1.38437	-4.70256
2013-09-23 02:00:00	1.69757	-5.05482
2013-09-23 03:00:00	1.96528	-5.19842
2013-09-23 04:00:00	2.61806	-5.15299
2013-09-23 05:00:00	2.46528	-5.96742
2013-09-23 06:00:00	2.63056	-6.41096
2013-09-23 07:00:00	3.74201	-6.96181
2013-09-23 08:00:00	2.83438	-5.34356
2013-09-23 09:00:00	2.1059	-4.27553
2013-09-23 10:00:00	2.43438	-3.36914
2013-09-23 11:00:00	2.56042	-3.49448
2013-09-23 12:00:00	2.5684	-2.50923
2013-09-23 13:00:00	1.90174	-1.86587
2013-09-23 14:00:00	1.56354	-1.88641
2013-09-23 15:00:00	1.96944	-1.94958
2013-09-23 16:00:00	1.68299	-1.99607
2013-09-23 17:00:00	1.28819	-2.5533
2013-09-23 18:00:00	1.51771	-3.48368
2013-09-23 19:00:00	1.25868	-4.35756
2013-09-23 20:00:00	0.82118	-5.55918
2013-09-23 21:00:00	1.54722	-5.44636
2013-09-23 22:00:00	1.82986	-5.88344
2013-09-23 23:00:00	1.81528	-6.79162
2013-09-24	1.65868	-6.92321
2013-09-24 01:00:00	1.27535	-8.28182
2013-09-24 02:00:00	1.15729	-7.92988
2013-09-24 03:00:00	1.91181	-7.27114
2013-09-24 04:00:00	0.952083	-5.74209
2013-09-24 05:00:00	0.948958	-5.4248
2013-09-24 06:00:00	1.11389	-5.40555
2013-09-24 07:00:00	1.08993	-4.7707
2013-09-24 08:00:00	2.43438	-4.28439
2013-09-24 09:00:00	2.52326	-3.75507
2013-09-24 10:00:00	3.13333	-3.28081
2013-09-24 11:00:00	2.71632	-2.78941
2013-09-24 12:00:00	3.10521	-2.22646
2013-09-24 13:00:00	4.18403	-1.75034
2013-09-24 14:00:00	3.37569	-1.00562
2013-09-24 15:00:00	2.85799	-2.11032
2013-09-24 16:00:00	3.15521	-2.40095
2013-09-24 17:00:00	2.83681	-2.34447
2013-09-24 18:00:00	2.68924	-2.54286
2013-09-24 19:00:00	1.51111	-3.66835
2013-09-24 20:00:00	2.96424	-5.73247
2013-09-24 21:00:00	2.39965	-5.97551
2013-09-24 22:00:00	2.12535	-5.72861
2013-09-24 23:00:00	0.5625	-5.40901
2013-09-25	0.715625	-4.86079
2013-09-25 01:00:00	0.248958	-5.05867
2013-09-25 02:00:00	0.229514	-4.41263
2013-09-25 03:00:00	0.277083	-3.90458
2013-09-25 04:00:00	0.399305	-4.02209
2013-09-25 05:00:00	0.369792	-3.30241
2013-09-25 06:00:00	0.697569	-3.17008
2013-09-25 07:00:00	1.07812	-2.7473
2013-09-25 08:00:00	0.870139	-2.18581
2013-09-25 09:00:00	0.650694	-1.85734
2013-09-25 10:00:00	0.809375	-1.50784
2013-09-25 11:00:00	0.433333	-0.9153
2013-09-25 12:00:00	0.799653	0.01328
2013-09-25 13:00:00	1.46215	0.81843
2013-09-25 14:00:00	4.34062	0.92878
2013-09-25 15:00:00	4.15139	0.86965
2013-09-25 16:00:00	2.15	-0.26453
2013-09-25 17:00:00	1.64305	-0.57658
2013-09-25 18:00:00	1.29618	-0.85844
2013-09-25 19:00:00	0.889236	-0.16286
2013-09-25 20:00:00	2.85729	-0.26062
2013-09-25 21:00:00	0.895486	-0.35833
2013-09-25 22:00:00	2.71319	-0.17068
2013-09-25 23:00:00	2.35035	-0.17851
2013-09-26	2.57535	-0.19806
2013-09-26 01:00:00	1.8691	-0.39583
2013-09-26 02:00:00	1.90104	-0.45675
2013-09-26 03:00:00	0.730903	-0.60038
2013-09-26 04:00:00	0.640278	-0.72244
2013-09-26 05:00:00	1.12813	-0.701
2013-09-26 06:00:00	2.21285	-0.10026
2013-09-26 07:00:00	1.80972	-0.57424
2013-09-26 08:00:00	1	-0.54887
2013-09-26 09:00:00	1.60069	-0.28017
2013-09-26 10:00:00	1.48507	-0.03371
2013-09-26 11:00:00	1.15208	0.22491
2013-09-26 12:00:00	0.53125	0.55869
2013-09-26 13:00:00	1.62847	0.50366
2013-09-26 14:00:00	1.35764	0.3544
2013-09-26 15:00:00	2.00729	0.3387
2013-09-26 16:00:00	1.83507	0.05636
2013-09-26 17:00:00	1.60486	-0.29189
2013-09-26 18:00:00	1.14549	-0.64328
2013-09-26 19:00:00	1.45451	-1.30158
2013-09-26 20:00:00	1.10521	-2.10258
2013-09-26 21:00:00	2.18438	-3.16545
2013-09-26 22:00:00	0.777083	-3.00335
2013-09-26 23:00:00	0.70243	-2.41023
2013-09-27	0.718055	-2.86975
2013-09-27 01:00:00	0.759028	-3.56156
2013-09-27 02:00:00	0.251042	-4.35833
2013-09-27 03:00:00	1.26215	-4.26129
2013-09-27 04:00:00	0.750694	-5.12565
2013-09-27 05:00:00	1.725	-4.73182
2013-09-27 06:00:00	2.55972	-4.92277
2013-09-27 07:00:00	1.31007	-5.1861
2013-09-27 08:00:00	1	-6.041
2013-09-27 09:00:00	1.00243	-2.67041
2013-09-27 10:00:00	1.11944	-0.91296
2013-09-27 11:00:00	0.377431	1.99012
2013-09-27 12:00:00	0.74375	2.34083
2013-09-27 13:00:00	0.268403	3.90221
2013-09-27 14:00:00	0.697917	3.52556
2013-09-27 15:00:00	0.666667	3.33985
2013-09-27 16:00:00	0.376389	3.26728
2013-09-27 17:00:00	0.853472	1.28413
2013-09-27 18:00:00	1.6684	-1.58391
2013-09-27 19:00:00	3.48819	-3.06549
2013-09-27 20:00:00	4.31493	-3.78089
2013-09-27 21:00:00	3.1434	-4.09644
2013-09-27 22:00:00	2.2934	-4.32714
2013-09-27 23:00:00	2.08854	-4.30788
2013-09-28	2.65764	-3.83099
2013-09-28 01:00:00	2.11042	-3.81172
2013-09-28 02:00:00	2.60903	-4.37682
2013-09-28 03:00:00	2.46806	-4.72104
2013-09-28 04:00:00	3.34167	-3.55
2013-09-28 05:00:00	1.66944	-2.84078
2013-09-28 06:00:00	1.27917	-2.8852
2013-09-28 07:00:00	1.04688	-2.91184
2013-09-28 08:00:00	0.933681	-2.40366
2013-09-28 09:00:00	0.692361	-1.85037
2013-09-28 10:00:00	2.10035	-1.51055
2013-09-28 11:00:00	2.53785	-1.36725
2013-09-28 12:00:00	3.18542	-1.15891
2013-09-28 13:00:00	2.99132	-0.93672
2013-09-28 14:00:00	3.59653	-0.99978
2013-09-28 15:00:00	2.89965	-1.10329
2013-09-28 16:00:00	2.70174	-1.17408
2013-09-28 17:00:00	2.03611	-1.36725
2013-09-28 18:00:00	2.08542	-1.85773
2013-09-28 19:00:00	0.936458	-1.96585
2013-09-28 20:00:00	1.04514	-2.28528
2013-09-28 21:00:00	1.91458	-2.90296
2013-09-28 22:00:00	1.46354	-3.39884
2013-09-28 23:00:00	1.6434	-3.57275
2013-09-29	1.88437	-3.54152
2013-09-29 01:00:00	2.03819	-3.69571
2013-09-29 02:00:00	2.08125	-3.65177
2013-09-29 03:00:00	1.99931	-3.6803
2013-09-29 04:00:00	1.85451	-4.11416
2013-09-29 05:00:00	2.16875	-4.05869
2013-09-29 06:00:00	2.42118	-4.09605
2013-09-29 07:00:00	1.95938	-4.19581
2013-09-29 08:00:00	1.40139	-3.77125
2013-09-29 09:00:00	2.75	-3.62864
2013-09-29 10:00:00	2.91285	-3.35989
2013-09-29 11:00:00	2.89931	-3.18899
2013-09-29 12:00:00	2.48438	-3.10795
2013-09-29 13:00:00	1.77222	-2.77705
2013-09-29 14:00:00	2.48854	-2.64916
2013-09-29 15:00:00	2.52986	-3.03307
2013-09-29 16:00:00	1.70174	-3.13111
2013-09-29 17:00:00	1.32361	-4.54124
2013-09-29 18:00:00	1.47847	-5.65506
2013-09-29 19:00:00	2.80868	-6.25563
2013-09-29 20:00:00	1.88576	-6.32616
2013-09-29 21:00:00	2.00868	-6.89349
2013-09-29 22:00:00	2.15139	-7.05678
2013-09-29 23:00:00	2.25278	-7.25801
2013-09-30	3.16285	-6.81785
2013-09-30 01:00:00	2.31076	-5.96819
2013-09-30 02:00:00	1.91806	-6.59951
2013-09-30 03:00:00	1.86979	-6.59219
2013-09-30 04:00:00	2.50868	-6.21478
2013-09-30 05:00:00	2.06528	-6.55015
2013-09-30 06:00:00	2.10139	-6.54167
2013-09-30 07:00:00	1.93785	-6.92282
2013-09-30 08:00:00	2.02049	-6.62227
2013-09-30 09:00:00	1.67674	-5.3066
2013-09-30 10:00:00	1.87014	-3.61091
2013-09-30 11:00:00	3.25243	-2.64027
2013-09-30 12:00:00	3.04896	-2.7276
2013-09-30 13:00:00	1.85174	-1.53307
2013-09-30 14:00:00	1.51076	-1.40105
2013-09-30 15:00:00	3.09444	-2.25626
2013-09-30 16:00:00	1.83924	-2.31701
2013-09-30 17:00:00	0.964236	-3.95698
2013-09-30 18:00:00	0.967014	-6.33927
2013-09-30 19:00:00	2.16736	-6.8769
2013-09-30 20:00:00	1.18611	-7.94964
2013-09-30 21:00:00	2.06458	-8.20774
2013-09-30 22:00:00	1.77014	-7.51697
2013-09-30 23:00:00	1.54722	-7.21126
2013-10-01	1.65486	-7.30012
2013-10-01 01:00:00	2.21806	-7.40872
2013-10-01 02:00:00	1.60799	-8.18099
2013-10-01 03:00:00	1.37257	-7.18886
2013-10-01 04:00:00	1.20278	-6.34351
2013-10-01 05:00:00	1.275	-6.28415
2013-10-01 06:00:00	1.56979	-7.08651
2013-10-01 07:00:00	1.98021	-6.07298
2013-10-01 08:00:00	1.30764	-6.18934
2013-10-01 09:00:00	0.923264	-6.07991
2013-10-01 10:00:00	1.59792	-4.61555
2013-10-01 11:00:00	1.78715	-3.91614
2013-10-01 12:00:00	1.24896	-3.25998
2013-10-01 13:00:00	1.68924	-2.12426
2013-10-01 14:00:00	1.25521	-1.55597
2013-10-01 15:00:00	0.906597	-1.01808
2013-10-01 16:00:00	1.02951	-2.63022
2013-10-01 17:00:00	2.1566	-2.96899
2013-10-01 18:00:00	1.79757	-5.06213
2013-10-01 19:00:00	1.26701	-6.03792
2013-10-01 20:00:00	1.10417	-6.22287
2013-10-01 21:00:00	0.749653	-6.16969
2013-10-01 22:00:00	0.755208	-6.77966
2013-10-01 23:00:00	1.07639	-7.90858
2013-10-02	1.33229	-6.33772
2013-10-02 01:00:00	1.77326	-7.2951
2013-10-02 02:00:00	0.758333	-7.32099
2013-10-02 03:00:00	0.909722	-8.17091
2013-10-02 04:00:00	0.716667	-7.91129
2013-10-02 05:00:00	0.786806	-8.14726
2013-10-02 06:00:00	1.21632	-9.21889
2013-10-02 07:00:00	1.50833	-8.24691
2013-10-02 08:00:00	1.16111	-7.91013
2013-10-02 09:00:00	1.25243	-8.30509
2013-10-02 10:00:00	1.73333	-5.28696
2013-10-02 11:00:00	1.72674	-5.93005
2013-10-02 12:00:00	1.9441	-4.60438
2013-10-02 13:00:00	0.708681	-3.88455
2013-10-02 14:00:00	0.417361	-3.33019
[truncated: 6,475 more rows]
